# Supplementary material for: The Impact of Cand1 in Prostate Cancer
Source: MDPI journal article supplement (doi:10.3390/cancers12020428), 2020-02-12
Supplement: s1 [file s1]

Tabelle1

GSE16560

|                              |                            |                  |
|------------------------------|----------------------------|------------------|
| <b>n</b>                     | total                      | 281              |
|                              | with Cand1 expression data | 280              |
| <b>Age, years</b>            | Mean                       | 74,0             |
|                              | SD                         | 7,2              |
|                              | Median                     | 74,0             |
|                              | Q25                        | 69,0             |
|                              | Q75                        | 79,0             |
|                              | Min                        | 51,0             |
|                              | Max                        | 91,0             |
| <b>Gleason Score</b>         | Mean                       | 7,2              |
|                              | SD                         | 1,1              |
|                              | Median                     | 7,0              |
|                              | Q25                        | 6,0              |
|                              | Q75                        | 8,0              |
|                              | Min                        | 6,0              |
|                              | Max                        | 10,0             |
| <b>Follow-up, months</b>     | Mean                       | 102,1            |
|                              | SD                         | 56,4             |
|                              | Median                     | 100,0            |
|                              | Q25                        | 52,0             |
|                              | Q75                        | 149,0            |
|                              | Min                        | 6,0              |
|                              | Max                        | 274,0            |
| <b>Survival event</b>        | Type                       | Overall survival |
|                              | Events, number             | 206              |
|                              | Events, % of total n       | 73,3             |
| <b>log2 Cand1 expression</b> | Mean                       | 12,3             |
|                              | SD                         | 0,5              |
|                              | Median                     | 12,4             |
|                              | Q25                        | 12,2             |
|                              | Q75                        | 12,6             |
|                              | Min                        | 9,9              |
|                              | Max                        | 13,1             |
|                              | Stratification threshold   | 12,56            |
| <b>n, Cand1 strata</b>       | Cand1 <sup>lo</sup>        | 187              |
|                              | Cand1 <sup>hi</sup>        | 93               |
|                              | NA                         | 1                |

Tabelle1

| <b>GSE70768</b>                   | <b>GSE70769</b>                   | <b>GSE40272</b>       |
|-----------------------------------|-----------------------------------|-----------------------|
| 112                               | 93                                | 87                    |
| 111                               | 92                                | 86                    |
| 60,5                              | NA                                | 61,0                  |
| 6,6                               |                                   | 7,1                   |
| 62,0                              |                                   | 62,0                  |
| 56,0                              |                                   | 57,0                  |
| 65,0                              |                                   | 65,0                  |
| 41,0                              |                                   | 43,0                  |
| 73,0                              |                                   | 73,0                  |
| 6,9                               | 7,0                               | NA                    |
| 0,5                               | 0,9                               |                       |
| 7,0                               | 7,0                               |                       |
| 7,0                               | 7,0                               |                       |
| 7,0                               | 7,0                               |                       |
| 6,0                               | 5,0                               |                       |
| 9,0                               | 10,0                              |                       |
| 35,6                              | 78,9                              | 35,6                  |
| 17,1                              | 21,0                              | 25,6                  |
| 34,0                              | 79,6                              | 32,4                  |
| 21,0                              | 67,9                              | 16,0                  |
| 50,8                              | 92,2                              | 59,0                  |
| 2,0                               | 1,8                               | 0,0                   |
| 66,8                              | 122,3                             | 91,8                  |
| Biochemical relapse-free survival | Biochemical relapse-free survival | Disease-free survival |
| 19                                | 45                                | 86                    |
| 17,0                              | 48,4                              | 100,0                 |
| 8,2                               | 8,6                               | -0,8                  |
| 0,3                               | 0,2                               | 0,8                   |
| 8,2                               | 8,6                               | -0,8                  |
| 8,0                               | 8,5                               | -1,1                  |
| 8,4                               | 8,8                               | -0,4                  |
| 7,6                               | 8,0                               | -4,2                  |
| 8,8                               | 9,2                               | 3,6                   |
| 8,26                              | 8,70                              | -0,79                 |
| 67                                | 64                                | 44                    |
| 44                                | 28                                | 42                    |
| 1                                 | 1                                 | 1                     |
