# Supplementary material for: The Impact of Cand1 in Prostate Cancer
Source: MDPI journal article supplement (doi:10.3390/cancers12020428), 2020-02-12
Supplement: s1 [file s1]

Supplementary\_table\_S2

| Study    | Probe ID  | Entrez Gene ID | Gene Symbol |
|----------|-----------|----------------|-------------|
| GSE16560 | DAP3_4247 | 4751           | NEK2        |
| GSE16560 | DAP1_1286 | 8357           | HIST1H3H    |
| GSE16560 | DAP4_0822 | 3781           | KCNN2       |
| GSE16560 | DAP1_2789 | 55832          | CAND1       |
| GSE16560 | DAP1_4872 | 10615          | SPAG5       |
| GSE16560 | DAP1_1629 | 4001           | LMNB1       |
| GSE16560 | DAP4_5741 | 7153           | TOP2A       |
| GSE16560 | DAP3_3833 | 23397          | NCAPH       |
| GSE16560 | DAP3_4041 | 332            | BIRC5       |
| GSE16560 | DAP1_4061 | 1033           | CDKN3       |
| GSE16560 | DAP4_2995 | 3110           | HLXB9       |
| GSE16560 | DAP1_5683 | 5999           | RGS4        |
| GSE16560 | DAP1_4207 | 547            | KIF1A       |
| GSE16560 | DAP1_3670 | 11065          | UBE2C       |
| GSE16560 | DAP4_4256 | 10609          | SC65        |
| GSE16560 | DAP1_2729 | 6241           | RRM2        |
| GSE16560 | DAP4_3996 | 9232           | PTTG1       |
| GSE16560 | DAP2_3709 | 51053          | GMNN        |
| GSE16560 | DAP2_3992 | 1063           | CENPF       |
| GSE16560 | DAP3_2180 | 1719           | DHFR        |
| GSE16560 | DAP1_5047 | 1397           | CRIP2       |
| GSE16560 | DAP1_2811 | 9319           | TRIP13      |
| GSE16560 | DAP1_4002 | 891            | CCNB1       |
| GSE16560 | DAP4_5736 | 5387           | PMS2L3      |
| GSE16560 | DAP3_6035 | 51203          | NUSAP1      |
| GSE16560 | DAP4_5055 | 9768           | KIAA0101    |
| GSE16560 | DAP3_1787 | 4173           | MCM4        |
| GSE16560 | DAP1_2954 | 4950           | OCLN        |
| GSE16560 | DAP3_0240 | 3092           | HIP1        |
| GSE16560 | DAP4_5744 | 5707           | PSMD1       |
| GSE16560 | DAP4_1493 | 11130          | ZWINT       |
| GSE16560 | DAP1_0021 | 2146           | EZH2        |
| GSE16560 | DAP1_4305 | 3251           | HPRT1       |
| GSE16560 | DAP1_2136 | 9787           | DLG7        |
| GSE16560 | DAP2_3314 | 4085           | MAD2L1      |
| GSE16560 | DAP3_4902 | 10499          | NCOA2       |
| GSE16560 | DAP1_2721 | 2961           | GTF2E2      |
| GSE16560 | DAP3_3377 | 9791           | PTDSS1      |
| GSE16560 | DAP3_0270 | 2176           | FANCC       |
| GSE16560 | DAP3_1711 | 9735           | KNTC1       |
| GSE16560 | DAP3_1685 | 56967          | C14orf132   |
| GSE16560 | DAP3_3105 | 4217           | MAP3K5      |
| GSE16560 | DAP3_1740 | 7323           | UBE2D3      |
| GSE16560 | DAP3_3526 | 3013           | HIST1H2AD   |
| GSE16560 | DAP1_4068 | 7083           | TK1         |
| GSE16560 | DAP3_2174 | 10987          | COPS5       |
| GSE16560 | DAP3_4872 | 8667           | EIF3S3      |
| GSE16560 | DAP1_3693 | 483            | ATP1B3      |
| GSE16560 | DAP4_3280 | 7341           | SUMO1       |
| GSE16560 | DAP2_0885 | 2305           | FOXM1       |
| GSE16560 | DAP3_4248 | 4947           | OAZ2        |

# Supplementary\_table\_S2

|          |           |        |           |
|----------|-----------|--------|-----------|
| GSE16560 | DAP1_5291 | 1287   | COL4A5    |
| GSE16560 | DAP1_1044 | 10797  | MTHFD2    |
| GSE40272 | X21134    | 3043   | HBB       |
| GSE40272 | X31415    | 6401   | SELE      |
| GSE40272 | X19928    | 6716   | SRD5A2    |
| GSE40272 | X3112     | 6943   | TCF21     |
| GSE40272 | X24202    | 712    | C1QA      |
| GSE40272 | X35880    | 5067   | CNTN3     |
| GSE40272 | X30188    | 33     | ACADL     |
| GSE40272 | X26593    | 64123  | ELTD1     |
| GSE40272 | X34760    | 1113   | CHGA      |
| GSE40272 | X38453    | 9560   | CCL4L1    |
| GSE40272 | X33581    | 6581   | SLC22A3   |
| GSE40272 | X40266    | 126    | ADH1C     |
| GSE40272 | X29965    | 3671   | ISLR      |
| GSE40272 | X40568    | 2953   | GSTT2     |
| GSE40272 | X30185    | 1359   | CPA3      |
| GSE40272 | X31671    | 221400 | TDRD6     |
| GSE40272 | X22881    | 64123  | ELTD1     |
| GSE40272 | X8792     | 6566   | SLC16A1   |
| GSE40272 | X37427    | 140458 | ASB5      |
| GSE40272 | X29823    | 130271 | PLEKHH2   |
| GSE40272 | X17314    | 55303  | GIMAP4    |
| GSE40272 | X40954    | 155060 | LOC155060 |
| GSE40272 | X29222    | 92344  | GORAB     |
| GSE40272 | X35939    | 157381 | LOC157381 |
| GSE40272 | X7398     | 285889 | LOC285889 |
| GSE40272 | X36981    | 3003   | GZMK      |
| GSE40272 | X18190    | 2359   | FPR3      |
| GSE40272 | X41619    | 283383 | GPR133    |
| GSE40272 | X35702    | 400944 | LOC400944 |
| GSE40272 | X20897    | 6713   | SQLE      |
| GSE40272 | X17377    | 85028  | SNHG12    |
| GSE40272 | X12500    | 256236 | NAPSB     |
| GSE40272 | X32789    | 222236 | NAPEPLD   |
| GSE40272 | X18193    | 60492  | CCDC90B   |
| GSE40272 | X10442    | 284033 | LOC284033 |
| GSE40272 | X13583    | 84289  | ING5      |
| GSE40272 | X16810    | 2139   | EYA2      |
| GSE40272 | X7360     | 3925   | STMN1     |
| GSE40272 | X12886    | 27018  | NGFRAP1   |
| GSE40272 | X20621    | 2953   | GSTT2     |
| GSE40272 | X44054    | 3638   | INSIG1    |
| GSE40272 | X37110    | 25805  | BAMBI     |
| GSE40272 | X13265    | 133923 | ZNF474    |
| GSE40272 | X7210     | 84306  | PDCD2L    |
| GSE40272 | X2730     | 1434   | CSE1L     |
| GSE40272 | X36616    | 83596  | BCL2L12   |
| GSE40272 | X29110    | 84889  | SLC7A3    |
| GSE40272 | X40224    | 11104  | KATNA1    |
| GSE40272 | X27134    | 4060   | LUM       |
| GSE40272 | X8662     | 8334   | HIST1H2AC |
| GSE40272 | X9267     | 1300   | COL10A1   |

# Supplementary\_table\_S2

|          |        |        |           |
|----------|--------|--------|-----------|
| GSE40272 | X32818 | 22849  | CPEB3     |
| GSE40272 | X28738 | 894    | CCND2     |
| GSE40272 | X12091 | 4709   | NDUFB3    |
| GSE40272 | X35742 | 51184  | GPN3      |
| GSE40272 | X19295 | 51510  | CHMP5     |
| GSE40272 | X40698 | 51192  | CKLF      |
| GSE40272 | X19479 | 65985  | AACS      |
| GSE40272 | X20891 | 11232  | POLG2     |
| GSE40272 | X41871 | 25900  | IFFO1     |
| GSE40272 | X37239 | 388753 | C1orf31   |
| GSE40272 | X3456  | 158586 | ZXDB      |
| GSE40272 | X35915 | 7283   | TUBG1     |
| GSE40272 | X14111 | 54567  | DLL4      |
| GSE40272 | X44309 | 81611  | ANP32E    |
| GSE40272 | X29220 | 55778  | ZNF839    |
| GSE40272 | X31101 | 5445   | PON2      |
| GSE40272 | X17970 | 221656 | KDM1B     |
| GSE40272 | X33226 | 85015  | USP45     |
| GSE40272 | X5886  | 7485   | WRB       |
| GSE40272 | X28046 | 11274  | USP18     |
| GSE40272 | X24516 | 375033 | PEAR1     |
| GSE40272 | X43247 | 51338  | MS4A4A    |
| GSE40272 | X39586 | 55832  | CAND1     |
| GSE40272 | X40836 | 6908   | TBP       |
| GSE40272 | X30817 | 3976   | LIF       |
| GSE40272 | X24147 | 825    | CAPN3     |
| GSE40272 | X26884 | 26785  | SNORD63   |
| GSE40272 | X29441 | 8089   | YEATS4    |
| GSE40272 | X40420 | 283747 | TCEB1P2   |
| GSE40272 | X25570 | 57584  | ARHGAP21  |
| GSE40272 | X1904  | 5889   | RAD51C    |
| GSE40272 | X40423 | 10063  | COX17     |
| GSE40272 | X26438 | 169200 | TMEM64    |
| GSE40272 | X22069 | 23317  | DNAJC13   |
| GSE40272 | X40271 | 55353  | LAPTM4B   |
| GSE40272 | X32526 | 285343 | C3orf23   |
| GSE40272 | X29918 | 51097  | SCCPDH    |
| GSE40272 | X26207 | 80263  | TRIM45    |
| GSE40272 | X34262 | 10741  | RBBP9     |
| GSE40272 | X33081 | 7556   | ZNF10     |
| GSE40272 | X19311 | 83468  | GLT8D2    |
| GSE40272 | X29677 | 117155 | CATSPER2  |
| GSE40272 | X37402 | 389166 | LOC389166 |
| GSE40272 | X41149 | 85459  | KIAA1731  |
| GSE40272 | X30968 | 23382  | AHCYL2    |
| GSE40272 | X40859 | 6637   | SNRPG     |
| GSE40272 | X41708 | 81625  | GALIG     |
| GSE40272 | X1489  | 8624   | PSMG1     |
| GSE40272 | X38617 | 64968  | MRPS6     |
| GSE40272 | X44340 | 79657  | RPAP3     |
| GSE40272 | X173   | 6307   | SC4MOL    |
| GSE40272 | X29844 | 51575  | ESF1      |
| GSE40272 | X25959 | 55012  | PPP2R3C   |

# Supplementary\_table\_S2

|          |        |        |           |
|----------|--------|--------|-----------|
| GSE40272 | X29046 | 51559  | NT5DC3    |
| GSE40272 | X40394 | 92597  | MOBK1A    |
| GSE40272 | X20855 | 57213  | SPRYD7    |
| GSE40272 | X35874 | 55773  | TBC1D23   |
| GSE40272 | X29376 | 54898  | ELOVL2    |
| GSE40272 | X24504 | 7626   | ZNF75D    |
| GSE40272 | X36643 | 55112  | WDR60     |
| GSE40272 | X36087 | 3682   | ITGAE     |
| GSE40272 | X41286 | 1960   | EGR3      |
| GSE40272 | X32877 | 3251   | HPRT1     |
| GSE40272 | X32874 | 6908   | TBP       |
| GSE40272 | X39494 | 83940  | TATDN1    |
| GSE40272 | X32268 | 154141 | MBOAT1    |
| GSE40272 | X24853 | 1073   | CFL2      |
| GSE40272 | X35059 | 6476   | SI        |
| GSE40272 | X33254 | 10038  | PARP2     |
| GSE40272 | X16268 | 282679 | AQP11     |
| GSE40272 | X3550  | 22948  | CCT5      |
| GSE40272 | X33721 | 285961 | SEPT7L    |
| GSE40272 | X36532 | 51406  | NOL7      |
| GSE40272 | X23402 | 390551 | LOC390551 |
| GSE40272 | X29165 | 3251   | HPRT1     |
| GSE40272 | X22875 | 23554  | TSPAN12   |
| GSE40272 | X31665 | 27031  | NPHP3     |
| GSE40272 | X36353 | 79135  | APOO      |
| GSE40272 | X10398 | 339804 | C2orf74   |
| GSE40272 | X18406 | 29781  | NCAPH2    |
| GSE40272 | X25541 | 28978  | TMEM14A   |
| GSE40272 | X30186 | 150094 | SIK1      |
| GSE40272 | X36708 | 115106 | HAUS1     |
| GSE40272 | X35988 | 134492 | NUDCD2    |
| GSE40272 | X32869 | 51635  | DHRS7     |
| GSE40272 | X34571 | 92126  | DSEL      |
| GSE40272 | X21388 | 148646 | C1orf188  |
| GSE40272 | X38728 | 6362   | CCL18     |
| GSE40272 | X14688 | 286410 | ATP11C    |
| GSE40272 | X41049 | 10782  | ZNF274    |
| GSE40272 | X14645 | 152189 | CMTM8     |
| GSE40272 | X44134 | 157317 | CYCSP55   |
| GSE40272 | X23239 | 11164  | NUDT5     |
| GSE40272 | X29644 | 3958   | LGALS3    |
| GSE40272 | X29316 | 90850  | ZNF598    |
| GSE40272 | X38719 | 254778 | C8orf46   |
| GSE40272 | X32277 | 126669 | SHE       |
| GSE40272 | X37903 | 113510 | HELQ      |
| GSE40272 | X21951 | 5217   | PFN2      |
| GSE40272 | X21480 | 1278   | COL1A2    |
| GSE40272 | X20274 | 104    | ADARB1    |
| GSE40272 | X40813 | 55253  | TYW1      |
| GSE40272 | X3464  | 51388  | NIP7      |
| GSE40272 | X15562 | 11193  | WBP4      |
| GSE40272 | X14433 | 131076 | CCDC58    |
| GSE40272 | X25446 | 54460  | MRPS21    |

# Supplementary\_table\_S2

|          |        |                 |
|----------|--------|-----------------|
| GSE40272 | X29448 | 5411 PNN        |
| GSE40272 | X33861 | 151556 GPR155   |
| GSE40272 | X39583 | 55860 ACTR10    |
| GSE40272 | X28319 | 115353 LRRC42   |
| GSE40272 | X29536 | 7694 ZNF135     |
| GSE40272 | X3376  | 79693 YRDC      |
| GSE40272 | X42803 | 10512 SEMA3C    |
| GSE40272 | X39564 | 51136 RNFT1     |
| GSE40272 | X40470 | 4706 NDUFAB1    |
| GSE40272 | X18236 | 1407 CRY1       |
| GSE40272 | X19166 | 4986 OPRK1      |
| GSE40272 | X16773 | 84233 TMEM126A  |
| GSE40272 | X25801 | 83943 IMMP2L    |
| GSE40272 | X25971 | 9908 G3BP2      |
| GSE40272 | X22106 | 55599 RNPC3     |
| GSE40272 | X30308 | 144811 LACC1    |
| GSE40272 | X3949  | 26504 CNNM4     |
| GSE40272 | X5227  | 91409 CCDC74B   |
| GSE40272 | X33994 | 90557 CCDC74A   |
| GSE40272 | X26712 | 9510 ADAMTS1    |
| GSE40272 | X4435  | 254428 SLC41A1  |
| GSE40272 | X23507 | 80006 C5orf44   |
| GSE40272 | X19966 | 55863 TMEM126B  |
| GSE40272 | X4445  | 1848 DUSP6      |
| GSE40272 | X10725 | 51023 MRPS18C   |
| GSE40272 | X42213 | 120 ADD3        |
| GSE40272 | X31896 | 2043 EPHA4      |
| GSE40272 | X5848  | 8803 SUCLA2     |
| GSE40272 | X29050 | 25829 TMEM184B  |
| GSE40272 | X40379 | 9912 ARHGAP44   |
| GSE40272 | X40359 | 22903 BTBD3     |
| GSE40272 | X28314 | 5732 PTGER2     |
| GSE40272 | X4182  | 56145 PCDHA3    |
| GSE40272 | X19707 | 2222 FDFT1      |
| GSE40272 | X33626 | 121260 SLC15A4  |
| GSE40272 | X21332 | 120376 C11orf93 |
| GSE40272 | X39695 | 54802 TRIT1     |
| GSE40272 | X11166 | 64216 TFB2M     |
| GSE40272 | X17616 | 10438 C1D       |
| GSE40272 | X23435 | 91452 ACBD5     |
| GSE40272 | X37356 | 122809 SOCS4    |
| GSE40272 | X39945 | 84693 MCEE      |
| GSE40272 | X12414 | 115426 UHRF2    |
| GSE40272 | X44239 | 64770 CCDC14    |
| GSE40272 | X36586 | 3251 HPRT1      |
| GSE40272 | X31535 | 10438 C1D       |
| GSE40272 | X8963  | 96459 FNIP1     |
| GSE40272 | X25728 | 1728 NQO1       |
| GSE40272 | X40583 | 51194 IPO11     |
| GSE40272 | X12610 | 3015 H2AFZ      |
| GSE40272 | X42072 | 65981 CAPRIN2   |
| GSE40272 | X33890 | 10287 RGS19     |
| GSE40272 | X38636 | 1466 CSRP2      |

# Supplementary\_table\_S2

|          |        |        |               |
|----------|--------|--------|---------------|
| GSE40272 | X11573 | 5110   | PCMT1         |
| GSE40272 | X28389 | 25994  | HIGD1A        |
| GSE40272 | X9366  | 22833  | KIAA0894      |
| GSE40272 | X10702 | 390    | RND3          |
| GSE40272 | X40625 | 9731   | CEP104        |
| GSE40272 | X39880 | 60493  | FASTKD5       |
| GSE40272 | X43095 | 6047   | RNF4          |
| GSE40272 | X15157 | 9652   | TTC37         |
| GSE40272 | X17311 | 5552   | SRGN          |
| GSE40272 | X17256 | 51362  | CDC40         |
| GSE40272 | X17065 | 441198 | LOC441198     |
| GSE40272 | X39319 | 1955   | MEGF9         |
| GSE40272 | X17196 | 23294  | ANKS1A        |
| GSE40272 | X7720  | 25842  | ASF1A         |
| GSE40272 | X43184 | 6596   | HLTF          |
| GSE40272 | X31512 | 203523 | ZNF449        |
| GSE40272 | X27512 | 64788  | LMF1          |
| GSE40272 | X4320  | 7360   | UGP2          |
| GSE40272 | X9434  | 840    | CASP7         |
| GSE40272 | X3666  | 23450  | SF3B3         |
| GSE40272 | X10253 | 27107  | ZBTB11        |
| GSE40272 | X42199 | 65062  | TMEM237       |
| GSE40272 | X28965 | 9873   | FCHSD2        |
| GSE40272 | X8590  | 25840  | METTL7A       |
| GSE40272 | X15394 | 8894   | EIF2S2        |
| GSE40272 | X33613 | 284412 | LOC284412     |
| GSE40272 | X28904 | 129531 | MITD1         |
| GSE40272 | X35389 | 54850  | FBXL12        |
| GSE40272 | X16944 | 51186  | WBP5          |
| GSE40272 | X44198 | 55027  | HEATR3        |
| GSE40272 | X41958 | 222161 | DKFZP586I1420 |
| GSE40272 | X35382 | 6453   | ITSN1         |
| GSE40272 | X9111  | 54977  | SLC25A38      |
| GSE40272 | X38471 | 10159  | ATP6AP2       |
| GSE40272 | X11112 | 55683  | KIAA1310      |
| GSE40272 | X18536 | 55746  | NUP133        |
| GSE40272 | X27640 | 5189   | PEX1          |
| GSE40272 | X34830 | 55148  | UBR7          |
| GSE40272 | X2970  | 81034  | SLC25A32      |
| GSE40272 | X37229 | 10561  | IFI44         |
| GSE40272 | X17687 | 55814  | BDP1          |
| GSE40272 | X33194 | 85440  | DOCK7         |
| GSE40272 | X17769 | 708    | C1QBP         |
| GSE40272 | X23417 | 9267   | CYTH1         |
| GSE40272 | X37761 | 91272  | BOD1          |
| GSE40272 | X25723 | 5283   | PIGH          |
| GSE40272 | X39180 | 5230   | PGK1          |
| GSE40272 | X17997 | 51096  | UTP18         |
| GSE40272 | X22101 | 8569   | MKNK1         |
| GSE40272 | X3636  | 84276  | NICN1         |
| GSE40272 | X41314 | 10462  | CLEC10A       |
| GSE40272 | X22862 | 10447  | FAM3C         |
| GSE40272 | X40217 | 1738   | DLD           |

# Supplementary\_table\_S2

|          |        |                     |
|----------|--------|---------------------|
| GSE40272 | X35085 | 48 ACO1             |
| GSE40272 | X7534  | 11266 DUSP12        |
| GSE40272 | X30173 | 64135 IFIH1         |
| GSE40272 | X22105 | 346990 H2AFZP2      |
| GSE40272 | X21968 | 6789 STK4           |
| GSE40272 | X14831 | 55629 PNRC2         |
| GSE40272 | X44341 | 285812 LOC285812    |
| GSE40272 | X20134 | 146880 LOC146880    |
| GSE40272 | X20903 | 55823 VPS11         |
| GSE40272 | X32717 | 135114 HINT3        |
| GSE40272 | X13410 | 10935 PRDX3         |
| GSE40272 | X24727 | 55276 PGM2          |
| GSE40272 | X42233 | 64786 TBC1D15       |
| GSE40272 | X40244 | 51426 POLK          |
| GSE40272 | X41732 | 2744 GLS            |
| GSE40272 | X23040 | 57584 ARHGAP21      |
| GSE40272 | X40817 | 57826 RAP2C         |
| GSE40272 | X2464  | 55907 CMAS          |
| GSE40272 | X18872 | 93487 MAPK1IP1L     |
| GSE40272 | X26282 | 25966 C2CD2         |
| GSE40272 | X32414 | 10440 TIMM17A       |
| GSE40272 | X31303 | 5718 PSMD12         |
| GSE40272 | X17423 | 54414 SIAE          |
| GSE40272 | X30092 | 6389 SDHA           |
| GSE40272 | X25105 | 51522 TMEM14C       |
| GSE40272 | X40063 | 51020 HDDC2         |
| GSE40272 | X22746 | 8505 PARG           |
| GSE40272 | X2346  | 9917 FAM20B         |
| GSE40272 | X4460  | 28972 SPCS1         |
| GSE40272 | X3386  | 7813 EVI5           |
| GSE40272 | X8033  | 6310 ATXN1          |
| GSE40272 | X24736 | 56967 C14orf132     |
| GSE40272 | X32904 | 83440 ADPGK         |
| GSE40272 | X34537 | 119016 AGAP4        |
| GSE40272 | X30821 | 157567 ANKRD46      |
| GSE40272 | X34114 | 51053 GMNN          |
| GSE40272 | X11501 | 25869 DKFZP564M1416 |
| GSE40272 | X3838  | 66036 MTMR9         |
| GSE40272 | X32610 | 1808 DPYSL2         |
| GSE40272 | X15638 | 51669 TMEM66        |
| GSE40272 | X34455 | 2857 GPR34          |
| GSE40272 | X39779 | 25909 AHCTF1        |
| GSE40272 | X31985 | 9079 LDB2           |
| GSE40272 | X14393 | 51315 KRCC1         |
| GSE40272 | X3147  | 55353 LAPTM4B       |
| GSE40272 | X8209  | 10857 PGRMC1        |
| GSE40272 | X40527 | 64333 ARHGAP9       |
| GSE40272 | X39008 | 27258 LSM3          |
| GSE40272 | X5843  | 29097 CNIH4         |
| GSE40272 | X43414 | 483 ATP1B3          |
| GSE40272 | X33817 | 51022 GLRX2         |
| GSE40272 | X2376  | 10434 LYPLA1        |
| GSE40272 | X34943 | 583 BBS2            |

# Supplementary\_table\_S2

|          |        |        |           |
|----------|--------|--------|-----------|
| GSE40272 | X11264 | 143684 | FAM76B    |
| GSE40272 | X42922 | 4152   | MBD1      |
| GSE40272 | X32631 | 51103  | NDUFAF1   |
| GSE40272 | X39919 | 171586 | ABHD3     |
| GSE40272 | X40416 | 8925   | HERC1     |
| GSE40272 | X2161  | 3091   | HIF1A     |
| GSE40272 | X42809 | 90806  | ANGEL2    |
| GSE40272 | X34674 | 34     | ACADM     |
| GSE40272 | X33191 | 51065  | RPS27L    |
| GSE40272 | X39390 | 11098  | PRSS23    |
| GSE40272 | X16327 | 6726   | SRP9      |
| GSE40272 | X31344 | 57533  | TBC1D14   |
| GSE40272 | X23008 | 55848  | C9orf46   |
| GSE40272 | X35716 | 60561  | RINT1     |
| GSE40272 | X5909  | 85403  | EAF1      |
| GSE40272 | X2501  | 257039 | LOC257039 |
| GSE40272 | X21004 | 51121  | RPL26L1   |
| GSE40272 | X21679 | 5868   | RAB5A     |
| GSE40272 | X5877  | 4189   | DNAJB9    |
| GSE40272 | X37484 | 81176  | OR7E126P  |
| GSE40272 | X31741 | 38     | ACAT1     |
| GSE40272 | X7545  | 134492 | NUDCD2    |
| GSE40272 | X44536 | 534    | ATP6V1G2  |
| GSE40272 | X31027 | 5281   | PIGF      |
| GSE40272 | X22791 | 64983  | MRPL32    |
| GSE40272 | X4766  | 57185  | NIPAL3    |
| GSE40272 | X8964  | 10484  | SEC23A    |
| GSE40272 | X27459 | 29103  | DNAJC15   |
| GSE40272 | X35886 | 5156   | PDGFRA    |
| GSE40272 | X3070  | 7159   | TP53BP2   |
| GSE40272 | X32757 | 4820   | NKTR      |
| GSE40272 | X39147 | 146443 | LOC146443 |
| GSE40272 | X15522 | 1102   | RCBTB2    |
| GSE40272 | X35888 | 83608  | C18orf21  |
| GSE40272 | X18957 | 567    | B2M       |
| GSE40272 | X37556 | 286053 | NSMCE2    |
| GSE40272 | X31562 | 134266 | GRPEL2    |
| GSE40272 | X26406 | 6814   | STXBP3    |
| GSE40272 | X8965  | 23421  | ITGB3BP   |
| GSE40272 | X43959 | 1491   | CTH       |
| GSE40272 | X20202 | 10057  | ABCC5     |
| GSE40272 | X21453 | 56945  | MRPS22    |
| GSE40272 | X38282 | 54955  | C1orf109  |
| GSE40272 | X3368  | 51626  | DYNC2LI1  |
| GSE40272 | X33000 | 440248 | HERC2P9   |
| GSE40272 | X25773 | 26273  | FBXO3     |
| GSE40272 | X41243 | 84216  | TMEM117   |
| GSE40272 | X16361 | 11342  | RNF13     |
| GSE40272 | X22399 | 123606 | NIPA1     |
| GSE40272 | X43002 | 254887 | ZDHHC23   |
| GSE40272 | X12984 | 5934   | RBL2      |
| GSE40272 | X33080 | 54916  | C14orf101 |
| GSE40272 | X12212 | 10989  | IMMT      |



# Supplementary\_table\_S2

|          |        |        |            |
|----------|--------|--------|------------|
| GSE40272 | X36509 | 59342  | SCPEP1     |
| GSE40272 | X3903  | 7342   | UBP1       |
| GSE40272 | X31374 | 51003  | MED31      |
| GSE40272 | X41485 | 55454  | CSGALNACT2 |
| GSE40272 | X18378 | 84617  | TUBB6      |
| GSE40272 | X31174 | 10487  | CAP1       |
| GSE40272 | X22225 | 22920  | KIFAP3     |
| GSE40272 | X39597 | 4677   | NARS       |
| GSE40272 | X35436 | 1601   | DAB2       |
| GSE40272 | X4621  | 515    | ATP5F1     |
| GSE40272 | X27082 | 8195   | MKKS       |
| GSE40272 | X23186 | 9532   | BAG2       |
| GSE40272 | X17645 | 64965  | MRPS9      |
| GSE40272 | X25204 | 60496  | AASDHPPT   |
| GSE40272 | X32914 | 8509   | NDST2      |
| GSE40272 | X5882  | 23379  | KIAA0947   |
| GSE40272 | X1901  | 286044 | LOC286044  |
| GSE40272 | X35665 | 11328  | FKBP9      |
| GSE40272 | X29167 | 567    | B2M        |
| GSE40272 | X29096 | 10010  | TANK       |
| GSE40272 | X36681 | 8976   | WASL       |
| GSE40272 | X32137 | 6611   | SMS        |
| GSE40272 | X33393 | 57579  | FAM135A    |
| GSE40272 | X33781 | 51649  | MRPS23     |
| GSE40272 | X35910 | 481    | ATP1B1     |
| GSE40272 | X10917 | 11120  | BTN2A1     |
| GSE40272 | X36871 | 51175  | TUBE1      |
| GSE40272 | X43001 | 23291  | FBXW11     |
| GSE40272 | X35385 | 8669   | EIF3J      |
| GSE40272 | X3755  | 23512  | SUZ12      |
| GSE40272 | X35102 | 137886 | UBXN2B     |
| GSE40272 | X23652 | 7319   | UBE2A      |
| GSE40272 | X40545 | 3845   | KRAS       |
| GSE40272 | X4298  | 3376   | IARS       |
| GSE40272 | X11616 | 23141  | ANKLE2     |
| GSE40272 | X44330 | 8613   | PPAP2B     |
| GSE40272 | X42912 | 64782  | AEN        |
| GSE40272 | X16451 | 2058   | EPRS       |
| GSE40272 | X16016 | 56647  | BCCIP      |
| GSE40272 | X36440 | 4817   | NIT1       |
| GSE40272 | X36646 | 9252   | RPS6KA5    |
| GSE40272 | X20780 | 55625  | ZDHHC7     |
| GSE40272 | X29916 | 27122  | DKK3       |
| GSE40272 | X41551 | 64116  | SLC39A8    |
| GSE40272 | X2580  | 81533  | ITFG1      |
| GSE40272 | X10684 | 10253  | SPRY2      |
| GSE40272 | X28881 | 147007 | TMEM199    |
| GSE40272 | X16225 | 4179   | CD46       |
| GSE40272 | X29335 | 84946  | LTV1       |
| GSE40272 | X44171 | 91050  | CCDC149    |
| GSE40272 | X17384 | 55709  | KBTBD4     |
| GSE40272 | X9078  | 7884   | SLBP       |
| GSE40272 | X38774 | 8813   | DPM1       |

# Supplementary\_table\_S2

|          |        |        |          |
|----------|--------|--------|----------|
| GSE40272 | X2753  | 84661  | DPY30    |
| GSE40272 | X26933 | 26589  | MRPL46   |
| GSE40272 | X33712 | 25936  | NSL1     |
| GSE40272 | X9255  | 6399   | TRAPPC2  |
| GSE40272 | X37228 | 55783  | FTSJD1   |
| GSE40272 | X40097 | 29107  | NXT1     |
| GSE40272 | X7015  | 9315   | C5orf13  |
| GSE40272 | X28966 | 10682  | EBP      |
| GSE40272 | X7641  | 10247  | HRSP12   |
| GSE40272 | X2797  | 64065  | PERP     |
| GSE40272 | X42716 | 51729  | WBP11    |
| GSE40272 | X12852 | 23636  | NUP62    |
| GSE40272 | X25344 | 128486 | FITM2    |
| GSE40272 | X21748 | 439965 | FAM35B2  |
| GSE40272 | X23440 | 57003  | CCDC47   |
| GSE40272 | X4617  | 7150   | TOP1     |
| GSE40272 | X15807 | 51729  | WBP11    |
| GSE40272 | X21579 | 63876  | PKNOX2   |
| GSE40272 | X43976 | 64601  | VPS16    |
| GSE40272 | X29162 | 567    | B2M      |
| GSE40272 | X21269 | 51569  | UFM1     |
| GSE40272 | X32968 | 55177  | FAM82A2  |
| GSE40272 | X18604 | 25938  | HEATR5A  |
| GSE40272 | X36239 | 55257  | C20orf20 |
| GSE40272 | X40219 | 378    | ARF4     |
| GSE40272 | X30667 | 222521 | C6orf224 |
| GSE40272 | X20079 | 515    | ATP5F1   |
| GSE40272 | X34795 | 51501  | C11orf73 |
| GSE40272 | X37079 | 10981  | RAB32    |
| GSE40272 | X38018 | 119032 | C10orf32 |
| GSE40272 | X40316 | 55854  | ZC3H15   |
| GSE40272 | X42814 | 55596  | ZCCHC8   |
| GSE40272 | X42070 | 8935   | SKAP2    |
| GSE40272 | X41348 | 83940  | TATDN1   |
| GSE40272 | X28329 | 960    | CD44     |
| GSE40272 | X28123 | 4708   | NDUFB2   |
| GSE40272 | X37400 | 1185   | CLCN6    |
| GSE40272 | X34816 | 2034   | EPAS1    |
| GSE40272 | X14566 | 11261  | CHP      |
| GSE40272 | X13602 | 5527   | PPP2R5C  |
| GSE40272 | X32227 | 154865 | IQUB     |
| GSE40272 | X32999 | 4565   | MT-TI    |
| GSE40272 | X39211 | 839    | CASP6    |
| GSE40272 | X13877 | 7126   | TNFAIP1  |
| GSE40272 | X42362 | 9869   | SETDB1   |
| GSE40272 | X29508 | 51444  | RNF138   |
| GSE40272 | X33210 | 2926   | GRSF1    |
| GSE40272 | X39819 | 10436  | EMG1     |
| GSE40272 | X30907 | 55625  | ZDHHC7   |
| GSE40272 | X28450 | 55752  | SEPT11   |
| GSE40272 | X7920  | 81558  | FAM117A  |
| GSE40272 | X44361 | 84447  | SYVN1    |
| GSE40272 | X23306 | 27316  | RBMX     |

# Supplementary\_table\_S2

|          |        |        |           |
|----------|--------|--------|-----------|
| GSE40272 | X16894 | 39     | ACAT2     |
| GSE40272 | X35398 | 84319  | C3orf26   |
| GSE40272 | X4593  | 2961   | GTF2E2    |
| GSE40272 | X17972 | 50999  | TMED5     |
| GSE40272 | X3575  | 54733  | SLC35F2   |
| GSE40272 | X6843  | 665    | BNIP3L    |
| GSE40272 | X24332 | 6637   | SNRPG     |
| GSE40272 | X30963 | 571    | BACH1     |
| GSE40272 | X26751 | 285622 | NBPF22P   |
| GSE40272 | X12497 | 10542  | HBXIP     |
| GSE40272 | X15087 | 57667  | KIAA1546  |
| GSE40272 | X22921 | 84908  | FAM136A   |
| GSE40272 | X40494 | 201965 | RWDD4     |
| GSE40272 | X28152 | 51606  | ATP6V1H   |
| GSE40272 | X39210 | 4092   | SMAD7     |
| GSE40272 | X32018 | 88523  | LOC88523  |
| GSE40272 | X41555 | 5805   | PTS       |
| GSE40272 | X37845 | 143884 | CWF19L2   |
| GSE40272 | X9621  | 85457  | KIAA1737  |
| GSE40272 | X42625 | 54101  | RIPK4     |
| GSE40272 | X43415 | 152559 | PAQR3     |
| GSE40272 | X22320 | 80349  | WDR61     |
| GSE40272 | X16015 | 55002  | TMCO3     |
| GSE40272 | X18239 | 51754  | TMEM8B    |
| GSE40272 | X28908 | 57498  | KIDINS220 |
| GSE40272 | X42757 | 85364  | ZCCHC3    |
| GSE40272 | X10327 | 114876 | OSBPL1A   |
| GSE40272 | X32894 | 9557   | CHD1L     |
| GSE40272 | X1205  | 5621   | PRNP      |
| GSE40272 | X40950 | 10810  | WASF3     |
| GSE40272 | X27698 | 10549  | PRDX4     |
| GSE40272 | X30962 | 54800  | KLHL24    |
| GSE40272 | X38207 | 10286  | BCAS2     |
| GSE40272 | X18366 | 9588   | PRDX6     |
| GSE40272 | X13897 | 7307   | U2AF1     |
| GSE40272 | X16452 | 22900  | CARD8     |
| GSE40272 | X31076 | 7465   | WEE1      |
| GSE40272 | X3411  | 9861   | PSMD6     |
| GSE40272 | X29307 | 567    | B2M       |
| GSE40272 | X40337 | 84311  | MRPL45    |
| GSE40272 | X35865 | 83700  | JAM3      |
| GSE40272 | X7011  | 440567 | UQCRHL    |
| GSE40272 | X16561 | 9553   | MRPL33    |
| GSE40272 | X32637 | 51335  | NGRN      |
| GSE40272 | X5045  | 4564   | MT-TH     |
| GSE40272 | X36388 | 57245  | FLJ20209  |
| GSE40272 | X40307 | 3150   | HMGN1     |
| GSE40272 | X17271 | 10153  | CEBPZ     |
| GSE40272 | X16179 | 283768 | GOLGA8G   |
| GSE40272 | X16084 | 8777   | MPDZ      |
| GSE40272 | X5091  | 64431  | ACTR6     |
| GSE40272 | X44112 | 57560  | IFT80     |
| GSE40272 | X31238 | 27020  | NPTN      |

# Supplementary\_table\_S2

|          |        |        |          |
|----------|--------|--------|----------|
| GSE40272 | X25342 | 79726  | WDR59    |
| GSE40272 | X3454  | 8653   | DDX3Y    |
| GSE40272 | X24099 | 221178 | SPATA13  |
| GSE40272 | X30511 | 11157  | LSM6     |
| GSE40272 | X19157 | 5048   | PAFAH1B1 |
| GSE40272 | X12716 | 140468 | COX11P1  |
| GSE40272 | X22873 | 10150  | MBNL2    |
| GSE40272 | X11371 | 10048  | RANBP9   |
| GSE40272 | X25703 | 55251  | PCMTD2   |
| GSE40272 | X40824 | 5311   | PKD2     |
| GSE40272 | X28448 | 56984  | PSMG2    |
| GSE40272 | X39800 | 51192  | CKLF     |
| GSE40272 | X23655 | 27309  | ZNF330   |
| GSE40272 | X40241 | 203547 | VMA21    |
| GSE40272 | X40802 | 84146  | ZNF644   |
| GSE40272 | X38217 | 79073  | TMEM109  |
| GSE40272 | X39093 | 55204  | GOLPH3L  |
| GSE40272 | X4271  | 57494  | RIMKLB   |
| GSE40272 | X39551 | 6905   | TBCE     |
| GSE40272 | X25769 | 836    | CASP3    |
| GSE40272 | X31121 | 4724   | NDUFS4   |
| GSE40272 | X10790 | 9589   | WTAP     |
| GSE40272 | X25776 | 51300  | TIMMDC1  |
| GSE40272 | X29182 | 9520   | NPEPPS   |
| GSE40272 | X25507 | 55032  | SLC35A5  |
| GSE40272 | X36502 | 3491   | CYR61    |
| GSE40272 | X16337 | 9020   | MAP3K14  |
| GSE40272 | X7284  | 1478   | CSTF2    |
| GSE40272 | X11723 | 10447  | FAM3C    |
| GSE40272 | X8015  | 84833  | USMG5    |
| GSE40272 | X21938 | 84932  | RAB2B    |
| GSE40272 | X8743  | 10342  | TFG      |
| GSE40272 | X43601 | 7913   | DEK      |
| GSE40272 | X1254  | 2005   | ELK4     |
| GSE40272 | X22683 | 83941  | TM2D1    |
| GSE40272 | X30131 | 27235  | COQ2     |
| GSE40272 | X28142 | 5716   | PSMD10   |
| GSE40272 | X40303 | 567    | B2M      |
| GSE40272 | X1816  | 1739   | DLG1     |
| GSE40272 | X25608 | 29058  | C20orf30 |
| GSE40272 | X18869 | 9693   | RAPGEF2  |
| GSE40272 | X10922 | 84317  | CCDC115  |
| GSE40272 | X5406  | 123803 | NTAN1    |
| GSE40272 | X9472  | 56995  | TULP4    |
| GSE40272 | X18249 | 8767   | RIPK2    |
| GSE40272 | X38412 | 29968  | PSAT1    |
| GSE40272 | X21496 | 64216  | TFB2M    |
| GSE40272 | X13671 | 549    | AUH      |
| GSE40272 | X15567 | 599    | BCL2L2   |
| GSE40272 | X11114 | 6189   | RPS3A    |
| GSE40272 | X901   | 4289   | MKLN1    |
| GSE40272 | X26290 | 18     | ABAT     |
| GSE40272 | X28535 | 8087   | FXR1     |

# Supplementary\_table\_S2

|          |        |        |           |
|----------|--------|--------|-----------|
| GSE40272 | X8023  | 6678   | SPARC     |
| GSE40272 | X16745 | 90693  | CCDC126   |
| GSE40272 | X40417 | 26521  | TIMM8B    |
| GSE40272 | X44230 | 202018 | TAPT1     |
| GSE40272 | X25273 | 79868  | ALG13     |
| GSE40272 | X7889  | 10920  | COPS8     |
| GSE40272 | X17217 | 1353   | COX11     |
| GSE40272 | X18199 | 8443   | GNPAT     |
| GSE40272 | X28177 | 23678  | SGK3      |
| GSE40272 | X41448 | 57037  | ANKMY2    |
| GSE40272 | X19890 | 5504   | PPP1R2    |
| GSE40272 | X19056 | 81609  | SNX27     |
| GSE40272 | X36846 | 220793 | FUNDC2P1  |
| GSE40272 | X22790 | 5901   | RAN       |
| GSE40272 | X20368 | 51603  | METT13    |
| GSE40272 | X41771 | 51218  | GLRX5     |
| GSE40272 | X1903  | 259282 | BOD1L     |
| GSE40272 | X15578 | 4670   | HNRNPM    |
| GSE40272 | X34308 | 27248  | ERLEC1    |
| GSE40272 | X39568 | 4568   | MT-L2     |
| GSE40272 | X42798 | 81037  | CLPTM1L   |
| GSE40272 | X13586 | 9639   | ARHGEF10  |
| GSE40272 | X39317 | 8850   | KAT2B     |
| GSE40272 | X35941 | 29970  | SCHIP1    |
| GSE40272 | X15905 | 26056  | RAB11FIP5 |
| GSE40272 | X31229 | 389203 | C4orf52   |
| GSE40272 | X1645  | 339287 | MSL1      |
| GSE40272 | X9250  | 94121  | SYTL4     |
| GSE40272 | X26091 | 5393   | EXOSC9    |
| GSE40272 | X33413 | 6908   | TBP       |
| GSE40272 | X32483 | 567    | B2M       |
| GSE40272 | X20273 | 9589   | WTAP      |
| GSE40272 | X6263  | 7419   | VDAC3     |
| GSE40272 | X17866 | 285148 | IAH1      |
| GSE40272 | X37827 | 9854   | C2CD2L    |
| GSE40272 | X12538 | 6605   | SMARCE1   |
| GSE40272 | X41596 | 57092  | PCNP      |
| GSE40272 | X15329 | 8930   | MBD4      |
| GSE40272 | X32954 | 54625  | PARP14    |
| GSE40272 | X44224 | 5515   | PPP2CA    |
| GSE40272 | X6159  | 54537  | FAM35A    |
| GSE40272 | X25712 | 2186   | BPTF      |
| GSE40272 | X33133 | 665    | BNIP3L    |
| GSE40272 | X30210 | 81689  | ISCA1     |
| GSE40272 | X32842 | 23189  | KANK1     |
| GSE40272 | X43960 | 159090 | FAM122B   |
| GSE40272 | X25925 | 139341 | FUNDC1    |
| GSE40272 | X35611 | 23411  | SIRT1     |
| GSE40272 | X7209  | 81606  | LBH       |
| GSE40272 | X39896 | 56930  | LOC56930  |
| GSE40272 | X36591 | 567    | B2M       |
| GSE40272 | X26328 | 27154  | BRPF3     |
| GSE40272 | X43381 | 123803 | NTAN1     |

# Supplementary\_table\_S2

|          |        |        |           |
|----------|--------|--------|-----------|
| GSE40272 | X30001 | 144348 | ZNF664    |
| GSE40272 | X33438 | 3320   | HSP90AA1  |
| GSE40272 | X37923 | 10049  | DNAJB6    |
| GSE40272 | X14311 | 80145  | THOC7     |
| GSE40272 | X36683 | 163126 | EID2      |
| GSE40272 | X1973  | 51201  | ZDHHC2    |
| GSE40272 | X4756  | 196446 | C12orf28  |
| GSE40272 | X10546 | 219854 | TMEM218   |
| GSE40272 | X1474  | 115426 | UHRF2     |
| GSE40272 | X6060  | 23133  | PHF8      |
| GSE40272 | X31787 | 83604  | TMEM47    |
| GSE40272 | X23926 | 80311  | KLHL15    |
| GSE40272 | X32069 | 29081  | METTL5    |
| GSE40272 | X39629 | 6227   | RPS21     |
| GSE40272 | X39200 | 64778  | FNDCC3B   |
| GSE40272 | X42065 | 84640  | USP38     |
| GSE40272 | X32704 | 55323  | LARP6     |
| GSE40272 | X5804  | 84312  | BRMS1L    |
| GSE40272 | X22876 | 25850  | ZNF345    |
| GSE40272 | X35607 | 1955   | MEGF9     |
| GSE40272 | X33231 | 55967  | NDUFA12   |
| GSE40272 | X20867 | 57045  | TWSG1     |
| GSE40272 | X44092 | 10973  | ASCC3     |
| GSE40272 | X39375 | 567    | B2M       |
| GSE40272 | X31951 | 567    | B2M       |
| GSE40272 | X14827 | 10063  | COX17     |
| GSE40272 | X36675 | 114790 | STK11IP   |
| GSE40272 | X42642 | 28998  | MRPL13    |
| GSE40272 | X5521  | 25923  | ATL3      |
| GSE40272 | X39699 | 7026   | NR2F2     |
| GSE40272 | X30525 | 5889   | RAD51C    |
| GSE40272 | X19469 | 283768 | GOLGA8G   |
| GSE40272 | X36582 | 54505  | DHX29     |
| GSE40272 | X36665 | 51765  | MST4      |
| GSE40272 | X22060 | 1371   | CPOX      |
| GSE40272 | X37109 | 23067  | SETD1B    |
| GSE40272 | X42074 | 284058 | KIAA1267  |
| GSE40272 | X36234 | 8812   | CCNK      |
| GSE40272 | X24840 | 63933  | CCDC90A   |
| GSE40272 | X36543 | 136319 | MTPN      |
| GSE40272 | X11076 | 6883   | TAF12     |
| GSE40272 | X10330 | 80010  | RMI1      |
| GSE40272 | X21130 | 92140  | MTDH      |
| GSE40272 | X38085 | 9324   | HMG3      |
| GSE40272 | X29481 | 83695  | C12orf32  |
| GSE40272 | X40341 | 329    | BIRC2     |
| GSE40272 | X25468 | 55717  | WDR11     |
| GSE40272 | X14901 | 4122   | MAN2A2    |
| GSE40272 | X21021 | 29093  | MRPL22    |
| GSE40272 | X18052 | 23511  | NUP188    |
| GSE40272 | X29133 | 5683   | PSMA2     |
| GSE40272 | X27130 | 9861   | PSMD6     |
| GSE40272 | X41434 | 114135 | LOC114135 |

# Supplementary\_table\_S2

|          |        |        |           |
|----------|--------|--------|-----------|
| GSE40272 | X15041 | 4528   | MTIF2     |
| GSE40272 | X35649 | 1635   | DCTD      |
| GSE40272 | X35242 | 1112   | FOXN3     |
| GSE40272 | X40631 | 55970  | GNG12     |
| GSE40272 | X38800 | 80298  | MTERFD3   |
| GSE40272 | X25047 | 54700  | RRN3      |
| GSE40272 | X37641 | 390948 | LOC390948 |
| GSE40272 | X29715 | 11282  | MGAT4B    |
| GSE40272 | X28360 | 5464   | PPA1      |
| GSE40272 | X7985  | 10969  | EBNA1BP2  |
| GSE40272 | X24745 | 10116  | FEM1B     |
| GSE40272 | X39381 | 10772  | SRSF10    |
| GSE40272 | X25042 | 79837  | PIP4K2C   |
| GSE40272 | X39173 | 128989 | C22orf25  |
| GSE40272 | X25722 | 30851  | TAX1BP3   |
| GSE40272 | X43923 | 283489 | ZNF828    |
| GSE40272 | X33818 | 53371  | NUP54     |
| GSE40272 | X42254 | 55218  | EXD2      |
| GSE40272 | X6177  | 51639  | SF3B14    |
| GSE40272 | X15082 | 57162  | PELI1     |
| GSE40272 | X20082 | 114971 | PTPMT1    |
| GSE40272 | X28330 | 1027   | CDKN1B    |
| GSE40272 | X15038 | 51292  | GMPR2     |
| GSE40272 | X28628 | 205428 | C3orf58   |
| GSE40272 | X6191  | 7417   | VDAC2     |
| GSE40272 | X43585 | 8675   | STX16     |
| GSE40272 | X23880 | 60592  | SCOC      |
| GSE40272 | X25660 | 1432   | MAPK14    |
| GSE40272 | X10140 | 26063  | DECR2     |
| GSE40272 | X13338 | 151445 | LOC151445 |
| GSE40272 | X17826 | 3251   | HPRT1     |
| GSE40272 | X37358 | 29978  | UBQLN2    |
| GSE40272 | X33841 | 130916 | MTERFD2   |
| GSE40272 | X21713 | 64215  | DNAJC1    |
| GSE40272 | X40053 | 10449  | ACAA2     |
| GSE40272 | X30965 | 9637   | FEZ2      |
| GSE40272 | X36024 | 5111   | PCNA      |
| GSE40272 | X15893 | 7411   | VBP1      |
| GSE40272 | X40190 | 79863  | RBFA      |
| GSE40272 | X26038 | 51660  | BRP44L    |
| GSE40272 | X38436 | 4052   | LTBP1     |
| GSE40272 | X40385 | 58486  | ZBED5     |
| GSE40272 | X27150 | 26053  | AUTS2     |
| GSE40272 | X8663  | 55120  | FANCL     |
| GSE40272 | X40432 | 10092  | ARPC5     |
| GSE40272 | X38624 | 8453   | CUL2      |
| GSE40272 | X31111 | 6477   | SIAH1     |
| GSE40272 | X14029 | 5682   | PSMA1     |
| GSE40272 | X19351 | 79139  | DERL1     |
| GSE40272 | X38568 | 55253  | TYW1      |
| GSE40272 | X25970 | 64219  | PJA1      |
| GSE40272 | X41054 | 51199  | NIN       |
| GSE40272 | X38497 | 444    | ASPH      |

# Supplementary\_table\_S2

|          |        |        |           |
|----------|--------|--------|-----------|
| GSE40272 | X36909 | 26994  | RNF11     |
| GSE40272 | X3264  | 8943   | AP3D1     |
| GSE40272 | X26460 | 25934  | NIPSNAP3A |
| GSE40272 | X13130 | 401029 | LOC401029 |
| GSE40272 | X33470 | 26273  | FBXO3     |
| GSE40272 | X22466 | 51735  | RAPGEF6   |
| GSE40272 | X39018 | 9821   | RB1CC1    |
| GSE40272 | X22856 | 9553   | MRPL33    |
| GSE40272 | X9555  | 291    | SLC25A4   |
| GSE40272 | X16927 | 55915  | LANCL2    |
| GSE40272 | X14913 | 1675   | CFD       |
| GSE40272 | X11810 | 10927  | SPIN1     |
| GSE40272 | X24737 | 5332   | PLCB4     |
| GSE40272 | X14836 | 10632  | ATP5L     |
| GSE40272 | X43758 | 8835   | SOCS2     |
| GSE40272 | X3577  | 56647  | BCCIP     |
| GSE40272 | X30930 | 988    | CDC5L     |
| GSE40272 | X24835 | 5827   | PXMP2     |
| GSE40272 | X40453 | 9100   | USP10     |
| GSE40272 | X42275 | 51258  | MRPL51    |
| GSE40272 | X30597 | 4664   | NAB1      |
| GSE40272 | X17577 | 1399   | CRKL      |
| GSE40272 | X14988 | 57179  | KIAA1191  |
| GSE40272 | X32411 | 440026 | TMEM41B   |
| GSE40272 | X9319  | 1783   | DYNC1LI2  |
| GSE40272 | X16251 | 158358 | KIAA2026  |
| GSE40272 | X21891 | 388962 | BOLA3     |
| GSE40272 | X12615 | 664    | BNIP3     |
| GSE40272 | X19763 | 374969 | CCDC23    |
| GSE40272 | X16210 | 114224 | PRO2852   |
| GSE40272 | X38072 | 54872  | PIGG      |
| GSE40272 | X16641 | 51719  | CAB39     |
| GSE40272 | X38662 | 27336  | HTATSF1   |
| GSE40272 | X21781 | 2990   | GUSB      |
| GSE40272 | X44089 | 528    | ATP6V1C1  |
| GSE40272 | X27500 | 439983 | CTGLF2    |
| GSE40272 | X30293 | 51026  | GOLT1B    |
| GSE40272 | X25471 | 2      | A2M       |
| GSE40272 | X40343 | 55795  | PCID2     |
| GSE40272 | X24347 | 158427 | TSTD2     |
| GSE40272 | X8996  | 6392   | SDHD      |
| GSE40272 | X42435 | 2274   | FHL2      |
| GSE40272 | X28568 | 23168  | RTF1      |
| GSE40272 | X23852 | 6297   | SALL2     |
| GSE40272 | X22869 | 5062   | PAK2      |
| GSE40272 | X40091 | 145567 | TTC7B     |
| GSE40272 | X17115 | 57209  | ZNF248    |
| GSE40272 | X5907  | 515    | ATP5F1    |
| GSE40272 | X3238  | 90411  | MCFD2     |
| GSE40272 | X34922 | 7170   | TPM3      |
| GSE40272 | X32265 | 90488  | C12orf23  |
| GSE40272 | X27368 | 28957  | MRPS28    |
| GSE40272 | X29555 | 137695 | TMEM68    |



# Supplementary\_table\_S2

|          |        |        |           |
|----------|--------|--------|-----------|
| GSE40272 | X21709 | 54927  | CHCHD3    |
| GSE40272 | X26457 | 800    | CALD1     |
| GSE40272 | X43591 | 5828   | PEX2      |
| GSE40272 | X36908 | 140461 | ASB8      |
| GSE40272 | X33360 | 3475   | IFRD1     |
| GSE40272 | X19457 | 1051   | CEBPB     |
| GSE40272 | X38994 | 4694   | NDUFA1    |
| GSE40272 | X14263 | 144438 | LOC144438 |
| GSE40272 | X2574  | 29116  | MYLIP     |
| GSE40272 | X11686 | 10971  | YWHAQ     |
| GSE40272 | X19771 | 55075  | UACA      |
| GSE40272 | X25033 | 10092  | ARPC5     |
| GSE40272 | X37735 | 55508  | SLC35E3   |
| GSE40272 | X27408 | 7763   | ZFAND5    |
| GSE40272 | X10199 | 5431   | POLR2B    |
| GSE40272 | X27219 | 80315  | CPEB4     |
| GSE40272 | X38335 | 23258  | DENND5A   |
| GSE40272 | X1832  | 65982  | ZSCAN18   |
| GSE40272 | X12557 | 51633  | OTUD6B    |
| GSE40272 | X21494 | 171546 | SPTSSA    |
| GSE40272 | X35811 | 10434  | LYPLA1    |
| GSE40272 | X32879 | 567    | B2M       |
| GSE40272 | X27704 | 6845   | VAMP7     |
| GSE40272 | X31206 | 8674   | VAMP4     |
| GSE40272 | X17559 | 22     | ABCB7     |
| GSE40272 | X4417  | 4190   | MDH1      |
| GSE40272 | X32070 | 81689  | ISCA1     |
| GSE40272 | X26699 | 23256  | SCFD1     |
| GSE40272 | X6682  | 81566  | CSRNP2    |
| GSE40272 | X16837 | 8050   | PDHX      |
| GSE40272 | X25536 | 9709   | HERPUD1   |
| GSE40272 | X13211 | 155061 | ZNF746    |
| GSE40272 | X21301 | 7286   | TUFT1     |
| GSE40272 | X7146  | 54726  | OTUD4     |
| GSE40272 | X22745 | 79901  | CYBRD1    |
| GSE40272 | X42512 | 80853  | JHDM1D    |
| GSE40272 | X40573 | 85369  | FAM40A    |
| GSE40272 | X31366 | 26258  | PLDN      |
| GSE40272 | X5313  | 9223   | MAGI1     |
| GSE40272 | X23562 | 4698   | NDUFA5    |
| GSE40272 | X36730 | 567    | B2M       |
| GSE40272 | X19035 | 23014  | FBXO21    |
| GSE40272 | X9389  | 7073   | TIAL1     |
| GSE40272 | X43434 | 9403   | SEP15     |
| GSE40272 | X33719 | 84078  | KBTBD7    |
| GSE40272 | X40557 | 153396 | TMEM161B  |
| GSE40272 | X38285 | 253769 | WDR27     |
| GSE40272 | X30146 | 54617  | INO80     |
| GSE40272 | X24742 | 23158  | TBC1D9    |
| GSE40272 | X19857 | 84987  | C12orf62  |
| GSE40272 | X7104  | 545    | ATR       |
| GSE40272 | X36628 | 1831   | TSC22D3   |
| GSE40272 | X20249 | 1347   | COX7A2    |

# Supplementary\_table\_S2

|          |        |        |          |
|----------|--------|--------|----------|
| GSE40272 | X6055  | 55727  | BTBD7    |
| GSE40272 | X17320 | 4780   | NFE2L2   |
| GSE40272 | X7219  | 23621  | BACE1    |
| GSE40272 | X23623 | 10049  | DNAJB6   |
| GSE40272 | X42674 | 8543   | LMO4     |
| GSE40272 | X1486  | 3148   | HMGB2    |
| GSE40272 | X13113 | 84572  | GNPTG    |
| GSE40272 | X34580 | 8727   | CTNNAL1  |
| GSE40272 | X30040 | 27244  | SESN1    |
| GSE40272 | X24098 | 9559   | VPS26A   |
| GSE40272 | X41169 | 3843   | IPO5     |
| GSE40272 | X20290 | 6880   | TAF9     |
| GSE40272 | X44270 | 4522   | MTHFD1   |
| GSE40272 | X39491 | 2339   | FNTA     |
| GSE40272 | X4053  | 10808  | HSPH1    |
| GSE40272 | X30311 | 55312  | RFK      |
| GSE40272 | X13895 | 56983  | POGLUT1  |
| GSE40272 | X23433 | 4750   | NEK1     |
| GSE40272 | X11929 | 79612  | NAA16    |
| GSE40272 | X19938 | 4891   | SLC11A2  |
| GSE40272 | X18321 | 151903 | CCDC12   |
| GSE40272 | X30940 | 5376   | PMP22    |
| GSE40272 | X14588 | 54942  | FAM206A  |
| GSE40272 | X9891  | 84919  | PPP1R15B |
| GSE40272 | X11248 | 3032   | HADHB    |
| GSE40272 | X4479  | 286472 | RAC1P4   |
| GSE40272 | X9520  | 51031  | GLOD4    |
| GSE40272 | X42033 | 1655   | DDX5     |
| GSE40272 | X32755 | 26985  | AP3M1    |
| GSE40272 | X12979 | 130355 | C2orf76  |
| GSE40272 | X4762  | 11044  | PAPD7    |
| GSE40272 | X40612 | 55744  | C7orf44  |
| GSE40272 | X39314 | 27430  | MAT2B    |
| GSE40272 | X29244 | 10730  | YME1L1   |
| GSE40272 | X34422 | 3336   | HSPE1    |
| GSE40272 | X31667 | 10190  | TXNDC9   |
| GSE40272 | X14296 | 6281   | S100A10  |
| GSE40272 | X14509 | 200030 | NBPF11   |
| GSE40272 | X11067 | 9354   | UBE4A    |
| GSE40272 | X5609  | 9039   | UBA3     |
| GSE40272 | X14291 | 10664  | CTCF     |
| GSE40272 | X38567 | 908    | CCT6A    |
| GSE40272 | X17020 | 4047   | LSS      |
| GSE40272 | X22107 | 57092  | PCNP     |
| GSE40272 | X31293 | 11142  | PKIG     |
| GSE40272 | X35470 | 6100   | RP9      |
| GSE40272 | X17101 | 567    | B2M      |
| GSE40272 | X8483  | 5214   | PFKP     |
| GSE40272 | X23931 | 6773   | STAT2    |
| GSE40272 | X37607 | 79717  | PPCS     |
| GSE40272 | X31410 | 10560  | SLC19A2  |
| GSE40272 | X23327 | 10099  | TSPAN3   |
| GSE40272 | X18108 | 1039   | CDR2     |

# Supplementary\_table\_S2

|          |        |        |           |
|----------|--------|--------|-----------|
| GSE40272 | X3373  | 5425   | POLD2     |
| GSE40272 | X41345 | 440709 | LOC440709 |
| GSE40272 | X13041 | 64745  | METTTL17  |
| GSE40272 | X6836  | 4615   | MYD88     |
| GSE40272 | X22848 | 9793   | CKAP5     |
| GSE40272 | X3291  | 11168  | PSIP1     |
| GSE40272 | X15755 | 7307   | U2AF1     |
| GSE40272 | X38772 | 22908  | SACM1L    |
| GSE40272 | X35381 | 55149  | MTPAP     |
| GSE40272 | X43733 | 3981   | LIG4      |
| GSE40272 | X36469 | 4905   | NSF       |
| GSE40272 | X15245 | 567    | B2M       |
| GSE40272 | X31023 | 567    | B2M       |
| GSE40272 | X36839 | 56160  | NDNL2     |
| GSE40272 | X35981 | 29079  | MED4      |
| GSE40272 | X42167 | 202459 | OSTCL     |
| GSE40272 | X1523  | 23484  | LEPROTL1  |
| GSE40272 | X30095 | 567    | B2M       |
| GSE40272 | X17456 | 6856   | SYPL1     |
| GSE40272 | X26446 | 29097  | CNIH4     |
| GSE40272 | X20906 | 10175  | CNIH      |
| GSE40272 | X31316 | 440066 | LOC440066 |
| GSE40272 | X33365 | 5861   | RAB1A     |
| GSE40272 | X21397 | 871    | SERPINH1  |
| GSE40272 | X27639 | 3685   | ITGAV     |
| GSE40272 | X17124 | 283232 | TMEM80    |
| GSE40272 | X24841 | 8895   | CPNE3     |
| GSE40272 | X3855  | 128    | ADH5      |
| GSE40272 | X23691 | 25853  | DCAF12    |
| GSE40272 | X17009 | 3655   | ITGA6     |
| GSE40272 | X23061 | 50804  | MYEF2     |
| GSE40272 | X24363 | 8204   | NRIP1     |
| GSE40272 | X20443 | 392487 | LOC392487 |
| GSE40272 | X43039 | 51258  | MRPL51    |
| GSE40272 | X20634 | 8678   | BECN1     |
| GSE40272 | X37206 | 128    | ADH5      |
| GSE40272 | X24608 | 133619 | PRRC1     |
| GSE40272 | X3549  | 830    | CAPZA2    |
| GSE40272 | X23568 | 57570  | TRMT5     |
| GSE40272 | X31059 | 23760  | PITPNB    |
| GSE40272 | X13606 | 440026 | TMEM41B   |
| GSE40272 | X31776 | 64089  | SNX16     |
| GSE40272 | X4609  | 10180  | RBM6      |
| GSE40272 | X28722 | 2782   | GNB1      |
| GSE40272 | X2905  | 7257   | TSNAX     |
| GSE40272 | X31172 | 65991  | FUNDC2    |
| GSE40272 | X16676 | 23067  | SETD1B    |
| GSE40272 | X6624  | 79886  | C9orf82   |
| GSE40272 | X42184 | 11171  | STRAP     |
| GSE40272 | X12134 | 11258  | DCTN3     |
| GSE40272 | X38833 | 9943   | OXSRI     |
| GSE40272 | X38957 | 22950  | SLC4A1AP  |
| GSE40272 | X36785 | 83930  | STARD3NL  |

# Supplementary\_table\_S2

|          |        |        |             |
|----------|--------|--------|-------------|
| GSE40272 | X42813 | 55030  | FBXO34      |
| GSE40272 | X10166 | 79188  | TMEM43      |
| GSE40272 | X4614  | 51015  | ISOC1       |
| GSE40272 | X3552  | 58515  | SELK        |
| GSE40272 | X31060 | 25959  | KANK2       |
| GSE40272 | X24480 | 64769  | MEAF6       |
| GSE40272 | X14519 | 54495  | TMX3        |
| GSE40272 | X22005 | 127687 | C1orf122    |
| GSE40272 | X33284 | 58493  | C9orf80     |
| GSE40272 | X14840 | 51307  | FAM53C      |
| GSE40272 | X37245 | 64860  | ARMCX5      |
| GSE40272 | X37459 | 6744   | SSFA2       |
| GSE40272 | X20266 | 51256  | TBC1D7      |
| GSE40272 | X2990  | 57492  | ARID1B      |
| GSE40272 | X34832 | 79145  | CHCHD7      |
| GSE40272 | X42068 | 9562   | MINPP1      |
| GSE40272 | X1830  | 3949   | LDLR        |
| GSE40272 | X26704 | 6787   | NEK4        |
| GSE40272 | X37613 | 55857  | PLK1S1      |
| GSE40272 | X28517 | 29929  | ALG6        |
| GSE40272 | X22015 | 150275 | CCDC117     |
| GSE40272 | X26270 | 10671  | DCTN6       |
| GSE40272 | X33397 | 23045  | FRYL        |
| GSE40272 | X35455 | 56683  | C21orf59    |
| GSE40272 | X22824 | 25926  | NOL11       |
| GSE40272 | X15261 | 145553 | MDP1        |
| GSE40272 | X7100  | 130814 | PQLC3       |
| GSE40272 | X31139 | 84084  | RAB6C       |
| GSE40272 | X10548 | 4952   | OCRL        |
| GSE40272 | X39042 | 10432  | RBM14       |
| GSE40272 | X3268  | 115416 | C7orf30     |
| GSE40272 | X21195 | 83891  | SNX25       |
| GSE40272 | X29504 | 29880  | ALG5        |
| GSE40272 | X7943  | 3150   | HMGN1       |
| GSE40272 | X41417 | 10933  | MORF4L1     |
| GSE40272 | X2092  | 84248  | FYTTD1      |
| GSE40272 | X39726 | 440702 | LOC440702   |
| GSE40272 | X43819 | 51142  | CHCHD2      |
| GSE40272 | X15804 | 116829 | N4BP2L2-IT1 |
| GSE40272 | X17300 | 22828  | SCAF8       |
| GSE40272 | X38593 | 10376  | TUBA1B      |
| GSE40272 | X26869 | 91754  | NEK9        |
| GSE40272 | X3517  | 8892   | EIF2B2      |
| GSE40272 | X10875 | 5236   | PGM1        |
| GSE40272 | X19510 | 283377 | SPRYD4      |
| GSE40272 | X25816 | 22948  | CCT5        |
| GSE40272 | X30176 | 23515  | MORC3       |
| GSE40272 | X38284 | 9819   | TSC22D2     |
| GSE40272 | X975   | 6788   | STK3        |
| GSE40272 | X24851 | 5500   | PPP1CB      |
| GSE40272 | X11000 | 55193  | PBRM1       |
| GSE40272 | X11851 | 23201  | FAM168A     |
| GSE40272 | X40245 | 84128  | WDR75       |

# Supplementary\_table\_S2

|          |        |        |          |
|----------|--------|--------|----------|
| GSE40272 | X27352 | 6772   | STAT1    |
| GSE40272 | X34610 | 2040   | STOM     |
| GSE40272 | X27635 | 5532   | PPP3CB   |
| GSE40272 | X9260  | 4697   | NDUFA4   |
| GSE40272 | X11687 | 7388   | UQCRH    |
| GSE40272 | X36872 | 54529  | ASNSD1   |
| GSE40272 | X40649 | 8440   | NCK2     |
| GSE40272 | X9020  | 6840   | SVIL     |
| GSE40272 | X38447 | 567    | B2M      |
| GSE40272 | X38694 | 1660   | DHX9     |
| GSE40272 | X39980 | 23016  | EXOSC7   |
| GSE40272 | X35581 | 7105   | TSPAN6   |
| GSE40272 | X43653 | 123169 | LEO1     |
| GSE40272 | X9266  | 847    | CAT      |
| GSE40272 | X9894  | 22928  | SEPHS2   |
| GSE40272 | X35824 | 54148  | MRPL39   |
| GSE40272 | X35683 | 27018  | NGFRAP1  |
| GSE40272 | X39393 | 10559  | SLC35A1  |
| GSE40272 | X22216 | 3490   | IGFBP7   |
| GSE40272 | X32044 | 23514  | KIAA0146 |
| GSE40272 | X30414 | 4292   | MLH1     |
| GSE40272 | X32871 | 81542  | TMX1     |
| GSE40272 | X35849 | 6902   | TBCA     |
| GSE40272 | X22158 | 4236   | MFAP1    |
| GSE40272 | X32828 | 51239  | ANKRD39  |
| GSE40272 | X19997 | 54780  | NSMCE4A  |
| GSE40272 | X14627 | 5162   | PDHB     |
| GSE40272 | X27320 | 64940  | STAG3L4  |
| GSE40272 | X13052 | 51626  | DYNC2LI1 |
| GSE40272 | X38003 | 55610  | CCDC132  |
| GSE40272 | X11432 | 91694  | LONRF1   |
| GSE40272 | X8738  | 22909  | FAN1     |
| GSE40272 | X34174 | 9530   | BAG4     |
| GSE40272 | X19474 | 9525   | VPS4B    |
| GSE40272 | X28293 | 9962   | SLC23A2  |
| GSE40272 | X29219 | 55056  | FLJ10038 |
| GSE40272 | X24606 | 4718   | NDUFC2   |
| GSE40272 | X12514 | 47     | ACLY     |
| GSE40272 | X13557 | 51188  | SS18L2   |
| GSE40272 | X36866 | 84259  | DCUN1D5  |
| GSE40272 | X14121 | 546    | ATRX     |
| GSE40272 | X34888 | 26521  | TIMM8B   |
| GSE40272 | X10726 | 7388   | UQCRH    |
| GSE40272 | X5593  | 6731   | SRP72    |
| GSE40272 | X34570 | 54861  | SNRK     |
| GSE40272 | X23526 | 10558  | SPTLC1   |
| GSE40272 | X29485 | 2631   | GBAS     |
| GSE40272 | X29418 | 5604   | MAP2K1   |
| GSE40272 | X13355 | 51650  | MRPS33   |
| GSE40272 | X39467 | 23048  | FNBP1    |
| GSE40272 | X22680 | 388962 | BOLA3    |
| GSE40272 | X30964 | 5911   | RAP2A    |
| GSE40272 | X33036 | 9842   | PLEKHM1  |

# Supplementary\_table\_S2

|          |        |                 |
|----------|--------|-----------------|
| GSE40272 | X42473 | 9913 SUPT7L     |
| GSE40272 | X27589 | 372 ARCN1       |
| GSE40272 | X10612 | 64853 AIDA      |
| GSE40272 | X19596 | 4628 MYH10      |
| GSE40272 | X35782 | 81892 SLIRP     |
| GSE40272 | X19535 | 7048 TGFB2      |
| GSE40272 | X39514 | 60 ACTB         |
| GSE40272 | X33225 | 84365 MKI67IP   |
| GSE40272 | X26178 | 51759 C9orf78   |
| GSE40272 | X33030 | 54543 TOMM7     |
| GSE40272 | X28031 | 56650 CLDND1    |
| GSE40272 | X39764 | 219654 ZCCHC24  |
| GSE40272 | X3002  | 81561 C2orf31   |
| GSE40272 | X40252 | 514 ATP5E       |
| GSE40272 | X13395 | 5223 PGAM1      |
| GSE40272 | X37553 | 131544 CRYBG3   |
| GSE40272 | X44344 | 79876 UBA5      |
| GSE40272 | X16081 | 7078 TIMP3      |
| GSE40272 | X8034  | 6643 SNX2       |
| GSE40272 | X3338  | 54948 MRPL16    |
| GSE40272 | X10342 | 7205 TRIP6      |
| GSE40272 | X43176 | 6059 ABCE1      |
| GSE40272 | X24623 | 5824 PEX19      |
| GSE40272 | X24731 | 149371 EXOC8    |
| GSE40272 | X11486 | 51637 C14orf166 |
| GSE40272 | X26928 | 3182 HNRNPAB    |
| GSE40272 | X24531 | 65220 NADK      |
| GSE40272 | X36224 | 27258 LSM3      |
| GSE40272 | X13916 | 60 ACTB         |
| GSE40272 | X35346 | 10286 BCAS2     |
| GSE40272 | X27068 | 9968 MED12      |
| GSE40272 | X5010  | 8883 NAE1       |
| GSE40272 | X17676 | 1477 CSTF1      |
| GSE40272 | X24082 | 285362 SUMF1    |
| GSE40272 | X16494 | 36 ACADSB       |
| GSE40272 | X24646 | 5870 RAB6A      |
| GSE40272 | X26324 | 79612 NAA16     |
| GSE40272 | X341   | 10651 MTX2      |
| GSE40272 | X39342 | 4502 MT2A       |
| GSE40272 | X27383 | 84991 RBM17     |
| GSE40272 | X35525 | 26263 FBXO22    |
| GSE40272 | X38146 | 8883 NAE1       |
| GSE40272 | X7965  | 7431 VIM        |
| GSE40272 | X24176 | 64397 ZFP106    |
| GSE40272 | X39470 | 51029 PPPDE1    |
| GSE40272 | X11269 | 961 CD47        |
| GSE40272 | X36511 | 9765 ZFYVE16    |
| GSE40272 | X40421 | 5756 TWF1       |
| GSE40272 | X8221  | 9252 RPS6KA5    |
| GSE40272 | X18397 | 253832 ZDHHC20  |
| GSE40272 | X30596 | 27247 NFU1      |
| GSE40272 | X34582 | 3263 HPX        |
| GSE40272 | X16912 | 441531 PGAM4    |

# Supplementary\_table\_S2

|          |        |        |           |
|----------|--------|--------|-----------|
| GSE40272 | X41742 | 9126   | SMC3      |
| GSE40272 | X43141 | 10044  | SH2D3C    |
| GSE40272 | X7241  | 81552  | VOPP1     |
| GSE40272 | X26480 | 83452  | RAB33B    |
| GSE40272 | X41266 | 145815 | MGC18216  |
| GSE40272 | X32929 | 286170 | LOC286170 |
| GSE40272 | X3096  | 23076  | RRP1B     |
| GSE40272 | X14317 | 567    | B2M       |
| GSE40272 | X39893 | 27236  | ARFIP1    |
| GSE40272 | X7336  | 60     | ACTB      |
| GSE40272 | X24442 | 24145  | PANX1     |
| GSE40272 | X13001 | 11334  | TUSC2     |
| GSE40272 | X2203  | 54534  | MRPL50    |
| GSE40272 | X21780 | 175    | AGA       |
| GSE40272 | X34143 | 54662  | TBC1D13   |
| GSE40272 | X16400 | 85365  | ALG2      |
| GSE40272 | X39590 | 23350  | U2SURP    |
| GSE40272 | X25770 | 85021  | REPS1     |
| GSE40272 | X18675 | 23548  | TTC33     |
| GSE40272 | X19965 | 5412   | UBL3      |
| GSE40272 | X35675 | 57496  | MKL2      |
| GSE40272 | X33625 | 10725  | NFAT5     |
| GSE40272 | X42626 | 55334  | SLC39A9   |
| GSE40272 | X38286 | 26092  | TOR1AIP1  |
| GSE40272 | X7835  | 81892  | SLIRP     |
| GSE40272 | X24943 | 23787  | MTCH1     |
| GSE40272 | X29424 | 389599 | STRADBP1  |
| GSE40272 | X18532 | 1385   | CREB1     |
| GSE40272 | X20341 | 64963  | MRPS11    |
| GSE40272 | X39842 | 5052   | PRDX1     |
| GSE40272 | X34938 | 96764  | TGS1      |
| GSE40272 | X36738 | 10477  | UBE2E3    |
| GSE40272 | X16143 | 51510  | CHMP5     |
| GSE40272 | X43078 | 56943  | ENY2      |
| GSE40272 | X16592 | 6500   | SKP1      |
| GSE40272 | X40514 | 51390  | AIG1      |
| GSE40272 | X4600  | 22934  | RPIA      |
| GSE40272 | X38185 | 6742   | SSBP1     |
| GSE40272 | X30284 | 201965 | RWDD4     |
| GSE40272 | X11726 | 360132 | FKBP9L    |
| GSE40272 | X31057 | 10767  | HBS1L     |
| GSE40272 | X22302 | 11157  | LSM6      |
| GSE40272 | X42710 | 23588  | KLHDC2    |
| GSE40272 | X28426 | 4707   | NDUFB1    |
| GSE40272 | X3359  | 55229  | PANK4     |
| GSE40272 | X35397 | 81614  | NIPA2     |
| GSE40272 | X15422 | 51517  | NCKIPSD   |
| GSE40272 | X31370 | 10507  | SEMA4D    |
| GSE40272 | X27319 | 63933  | CCDC90A   |
| GSE40272 | X35062 | 8545   | CGGBP1    |
| GSE40272 | X4017  | 10558  | SPTLC1    |
| GSE40272 | X36425 | 2730   | GCLM      |
| GSE40272 | X35012 | 23141  | ANKLE2    |

# Supplementary\_table\_S2

|          |        |        |           |
|----------|--------|--------|-----------|
| GSE40272 | X19214 | 8562   | DENR      |
| GSE40272 | X29342 | 3293   | HSD17B3   |
| GSE40272 | X41007 | 23479  | ISCU      |
| GSE40272 | X43238 | 10376  | TUBA1B    |
| GSE40272 | X26231 | 79680  | C22orf29  |
| GSE40272 | X13587 | 171546 | SPTSSA    |
| GSE40272 | X20782 | 22938  | SNW1      |
| GSE40272 | X21150 | 119504 | ANAPC16   |
| GSE40272 | X29309 | 6185   | RPN2      |
| GSE40272 | X9262  | 3312   | HSPA8     |
| GSE40272 | X29575 | 5716   | PSMD10    |
| GSE40272 | X20096 | 6342   | SCP2      |
| GSE40272 | X34679 | 23140  | ZZEF1     |
| GSE40272 | X13394 | 5937   | RBMS1     |
| GSE40272 | X39490 | 84992  | PIGY      |
| GSE40272 | X32488 | 567    | B2M       |
| GSE40272 | X18072 | 56658  | TRIM39    |
| GSE40272 | X42879 | 5683   | PSMA2     |
| GSE40272 | X16390 | 26130  | GAPVD1    |
| GSE40272 | X20910 | 4724   | NDUFS4    |
| GSE40272 | X22882 | 6934   | TCF7L2    |
| GSE40272 | X36915 | 9669   | EIF5B     |
| GSE40272 | X42271 | 9877   | ZC3H11A   |
| GSE40272 | X7384  | 11325  | DDX42     |
| GSE40272 | X37519 | 567    | B2M       |
| GSE40272 | X28295 | 2475   | MTOR      |
| GSE40272 | X21511 | 6880   | TAF9      |
| GSE40272 | X14899 | 6427   | SRSF2     |
| GSE40272 | X31890 | 2729   | GCLC      |
| GSE40272 | X24175 | 57583  | TMEM181   |
| GSE40272 | X38235 | 23095  | KIF1B     |
| GSE40272 | X24728 | 55841  | WWC3      |
| GSE40272 | X37343 | 81565  | NDEL1     |
| GSE40272 | X19727 | 5501   | PPP1CC    |
| GSE40272 | X29173 | 6230   | RPS25     |
| GSE40272 | X27406 | 54906  | C10orf18  |
| GSE40272 | X29558 | 339290 | LOC339290 |
| GSE40272 | X18707 | 29964  | PRICKLE4  |
| GSE40272 | X25674 | 92906  | HNRPLL    |
| GSE40272 | X31872 | 127018 | LYPLAL1   |
| GSE40272 | X43918 | 5436   | POLR2G    |
| GSE40272 | X3393  | 4141   | MARS      |
| GSE40272 | X32127 | 64981  | MRPL34    |
| GSE40272 | X38390 | 10457  | GPNMB     |
| GSE40272 | X19682 | 403    | ARL3      |
| GSE40272 | X22530 | 8874   | ARHGEF7   |
| GSE40272 | X16338 | 9775   | EIF4A3    |
| GSE40272 | X22753 | 91298  | C12orf29  |
| GSE40272 | X31046 | 57002  | C7orf36   |
| GSE40272 | X28520 | 55749  | CCAR1     |
| GSE40272 | X16608 | 84191  | FAM96A    |
| GSE40272 | X7383  | 10006  | ABI1      |
| GSE40272 | X33332 | 8574   | AKR7A2    |



# Supplementary\_table\_S2

|          |        |        |               |
|----------|--------|--------|---------------|
| GSE40272 | X21330 | 79745  | CLIP4         |
| GSE40272 | X43302 | 23358  | USP24         |
| GSE40272 | X31314 | 5631   | PRPS1         |
| GSE40272 | X1689  | 5781   | PTPN11        |
| GSE40272 | X23858 | 150472 | CBWD2         |
| GSE40272 | X5290  | 5908   | RAP1B         |
| GSE40272 | X10995 | 128866 | CHMP4B        |
| GSE40272 | X761   | 8655   | DYNLL1        |
| GSE40272 | X4499  | 26275  | HIBCH         |
| GSE40272 | X36467 | 27342  | RABGEF1       |
| GSE40272 | X26639 | 5906   | RAP1A         |
| GSE40272 | X14191 | 51626  | DYNC2LI1      |
| GSE40272 | X40104 | 2959   | GTF2B         |
| GSE40272 | X29680 | 57108  | SETD8P1       |
| GSE40272 | X28035 | 60313  | GPBP1L1       |
| GSE40272 | X27117 | 5687   | PSMA6         |
| GSE40272 | X30250 | 8520   | HAT1          |
| GSE40272 | X11249 | 55184  | C20orf12      |
| GSE40272 | X11533 | 567    | B2M           |
| GSE40272 | X6483  | 11215  | AKAP11        |
| GSE40272 | X44153 | 567    | B2M           |
| GSE40272 | X7858  | 134553 | C5orf24       |
| GSE40272 | X25731 | 123811 | FOPNL         |
| GSE40272 | X28041 | 54537  | FAM35A        |
| GSE40272 | X11024 | 11345  | GABARAPL2     |
| GSE40272 | X4193  | 8805   | TRIM24        |
| GSE40272 | X32996 | 91272  | BOD1          |
| GSE40272 | X26659 | 23478  | SEC11A        |
| GSE40272 | X10028 | 2098   | ESD           |
| GSE40272 | X36674 | 64776  | C11orf1       |
| GSE40272 | X32986 | 79685  | SAP30L        |
| GSE40272 | X33292 | 23326  | USP22         |
| GSE40272 | X5548  | 441155 | LOC441155     |
| GSE40272 | X37926 | 3688   | ITGB1         |
| GSE40272 | X35669 | 908    | CCT6A         |
| GSE40272 | X11476 | 7321   | UBE2D1        |
| GSE40272 | X5203  | 26101  | DKFZP564M1462 |
| GSE40272 | X32790 | 29994  | BAZ2B         |
| GSE40272 | X36162 | 90462  | ZNF605        |
| GSE40272 | X42848 | 8802   | SUCLG1        |
| GSE40272 | X11999 | 93621  | MRFAP1        |
| GSE40272 | X43305 | 10289  | EIF1B         |
| GSE40272 | X18283 | 80227  | PAAF1         |
| GSE40272 | X21795 | 54940  | OCIAD1        |
| GSE40272 | X5247  | 57515  | SERINC1       |
| GSE40272 | X38499 | 688    | KLF5          |
| GSE40272 | X9001  | 8562   | DENR          |
| GSE40272 | X34377 | 10483  | SEC23B        |
| GSE40272 | X24469 | 8669   | EIF3J         |
| GSE40272 | X36497 | 1793   | DOCK1         |
| GSE40272 | X36352 | 56681  | SAR1A         |
| GSE40272 | X15806 | 5464   | PPA1          |
| GSE40272 | X17753 | 7508   | XPC           |

# Supplementary\_table\_S2

|          |        |        |           |
|----------|--------|--------|-----------|
| GSE40272 | X19152 | 51030  | FAM18B1   |
| GSE40272 | X35068 | 79921  | TCEAL4    |
| GSE40272 | X8065  | 64983  | MRPL32    |
| GSE40272 | X12093 | 51714  | SELT      |
| GSE40272 | X17313 | 5257   | PHKB      |
| GSE40272 | X18115 | 10712  | FAM189B   |
| GSE40272 | X22496 | 84265  | POLR3GL   |
| GSE40272 | X11886 | 55017  | C14orf119 |
| GSE40272 | X18187 | 8872   | CDC123    |
| GSE40272 | X39171 | 6432   | SRSF7     |
| GSE40272 | X15897 | 10210  | TOPORS    |
| GSE40272 | X36197 | 567    | B2M       |
| GSE40272 | X31284 | 51372  | CCDC72    |
| GSE40272 | X34873 | 567    | B2M       |
| GSE40272 | X6302  | 114884 | OSBPL10   |
| GSE40272 | X5597  | 84817  | TXNDC17   |
| GSE40272 | X19956 | 283680 | LOC283680 |
| GSE40272 | X10178 | 8772   | FADD      |
| GSE40272 | X37573 | 152503 | SH3D19    |
| GSE40272 | X40873 | 117143 | TADA1     |
| GSE40272 | X40138 | 29105  | C16orf80  |
| GSE40272 | X7697  | 221154 | EFHA1     |
| GSE40272 | X25196 | 5641   | LGMN      |
| GSE40272 | X30910 | 93622  | LOC93622  |
| GSE40272 | X39911 | 567    | B2M       |
| GSE40272 | X44430 | 51012  | SLMO2     |
| GSE40272 | X35309 | 3189   | HNRNPH3   |
| GSE40272 | X38737 | 51501  | C11orf73  |
| GSE40272 | X40444 | 567    | B2M       |
| GSE40272 | X16642 | 54915  | YTHDF1    |
| GSE40272 | X23208 | 567    | B2M       |
| GSE40272 | X27450 | 567    | B2M       |
| GSE40272 | X6088  | 10951  | CBX1      |
| GSE40272 | X6560  | 1459   | CSNK2A2   |
| GSE40272 | X17121 | 9978   | RBX1      |
| GSE40272 | X41763 | 567    | B2M       |
| GSE40272 | X18609 | 114882 | OSBPL8    |
| GSE40272 | X36225 | 6827   | SUPT4H1   |
| GSE40272 | X35410 | 908    | CCT6A     |
| GSE40272 | X36472 | 84187  | TMEM164   |
| GSE40272 | X33807 | 567    | B2M       |
| GSE40272 | X40127 | 54910  | SEMA4C    |
| GSE40272 | X8844  | 26269  | FBXO8     |
| GSE40272 | X278   | 7336   | UBE2V2    |
| GSE40272 | X25998 | 132    | ADK       |
| GSE40272 | X8144  | 64398  | MPP5      |
| GSE40272 | X18203 | 9326   | ZNHIT3    |
| GSE40272 | X21070 | 51218  | GLRX5     |
| GSE40272 | X25593 | 567    | B2M       |
| GSE40272 | X26500 | 387805 | LOC387805 |
| GSE40272 | X29683 | 9946   | CRYZL1    |
| GSE40272 | X11522 | 25875  | LETMD1    |
| GSE40272 | X40778 | 128240 | APOA1BP   |

# Supplementary\_table\_S2

|          |        |        |           |
|----------|--------|--------|-----------|
| GSE40272 | X27962 | 94101  | ORMDL1    |
| GSE40272 | X35663 | 567    | B2M       |
| GSE40272 | X21825 | 57511  | COG6      |
| GSE40272 | X24769 | 84324  | SARNP     |
| GSE40272 | X2769  | 6873   | TAF2      |
| GSE40272 | X14672 | 5688   | PSMA7     |
| GSE40272 | X21328 | 10952  | SEC61B    |
| GSE40272 | X16118 | 10016  | PDCD6     |
| GSE40272 | X7147  | 3032   | HADHB     |
| GSE40272 | X42102 | 10463  | SLC30A9   |
| GSE40272 | X36737 | 10539  | GLRX3     |
| GSE40272 | X6893  | 567    | B2M       |
| GSE40272 | X26489 | 64951  | MRPS24    |
| GSE40272 | X31956 | 64979  | MRPL36    |
| GSE40272 | X20206 | 3621   | ING1      |
| GSE40272 | X29086 | 6429   | SRSF4     |
| GSE40272 | X12789 | 55435  | AP1AR     |
| GSE40272 | X21956 | 8289   | ARID1A    |
| GSE40272 | X18948 | 5082   | PDCL      |
| GSE40272 | X13681 | 28987  | NOB1      |
| GSE40272 | X38487 | 65018  | PINK1     |
| GSE40272 | X23496 | 3930   | LBR       |
| GSE40272 | X27784 | 51193  | ZNF639    |
| GSE40272 | X43734 | 51143  | DYNC1LI1  |
| GSE40272 | X41784 | 55146  | ZDHC4     |
| GSE40272 | X23622 | 5684   | PSMA3     |
| GSE40272 | X30183 | 79447  | C16orf53  |
| GSE40272 | X30282 | 84061  | MAGT1     |
| GSE40272 | X24403 | 3303   | HSPA1A    |
| GSE40272 | X35481 | 85027  | C5orf62   |
| GSE40272 | X20561 | 54545  | MTMR12    |
| GSE40272 | X2980  | 55699  | IARS2     |
| GSE40272 | X43167 | 121441 | NEDD1     |
| GSE40272 | X5691  | 22978  | NT5C2     |
| GSE40272 | X6370  | 4673   | NAP1L1    |
| GSE40272 | X36427 | 64430  | C14orf135 |
| GSE40272 | X16269 | 51646  | YPEL5     |
| GSE40272 | X33883 | 23353  | SUN1      |
| GSE40272 | X2762  | 6726   | SRP9      |
| GSE40272 | X204   | 1349   | COX7B     |
| GSE40272 | X3685  | 2799   | GNS       |
| GSE40272 | X21109 | 10988  | METAP2    |
| GSE40272 | X42742 | 23644  | EDC4      |
| GSE40272 | X29047 | 8050   | PDHX      |
| GSE40272 | X9772  | 23189  | KANK1     |
| GSE40272 | X38670 | 55326  | AGPAT5    |
| GSE40272 | X35715 | 5747   | PTK2      |
| GSE40272 | X23137 | 56262  | LRRC8A    |
| GSE40272 | X34074 | 51566  | ARMCX3    |
| GSE40272 | X5765  | 11235  | PDCD10    |
| GSE40272 | X7120  | 648    | BMI1      |
| GSE40272 | X41901 | 5516   | PPP2CB    |
| GSE40272 | X44272 | 3094   | HINT1     |

# Supplementary\_table\_S2

|          |        |        |          |
|----------|--------|--------|----------|
| GSE40272 | X37867 | 285148 | IAH1     |
| GSE40272 | X15498 | 1348   | COX7A2P2 |
| GSE40272 | X13928 | 567    | B2M      |
| GSE40272 | X20536 | 25814  | ATXN10   |
| GSE40272 | X24463 | 84942  | WDR73    |
| GSE40272 | X34296 | 23252  | OTUD3    |
| GSE40272 | X21535 | 54902  | TTC19    |
| GSE40272 | X15451 | 23499  | MACF1    |
| GSE40272 | X32962 | 64708  | COPS7B   |
| GSE40272 | X15403 | 153527 | ZMAT2    |
| GSE40272 | X9236  | 51439  | FAM8A1   |
| GSE40272 | X38038 | 4301   | MLLT4    |
| GSE40272 | X42364 | 23047  | PDS5B    |
| GSE40272 | X12654 | 55627  | SMPD4    |
| GSE40272 | X13293 | 54994  | C20orf11 |
| GSE40272 | X17194 | 10130  | PDIA6    |
| GSE40272 | X37227 | 54386  | TERF2IP  |
| GSE40272 | X32145 | 9337   | CNOT8    |
| GSE40272 | X31836 | 51626  | DYNC2LI1 |
| GSE40272 | X28358 | 7416   | VDAC1    |
| GSE40272 | X38650 | 9815   | GIT2     |
| GSE40272 | X40621 | 27230  | SERP1    |
| GSE40272 | X39142 | 2958   | GTF2A2   |
| GSE40272 | X2444  | 9789   | SPCS2    |
| GSE40272 | X28494 | 79644  | SRD5A3   |
| GSE40272 | X28592 | 6950   | TCP1     |
| GSE40272 | X34523 | 23054  | NCOA6    |
| GSE40272 | X28788 | 79837  | PIP4K2C  |
| GSE40272 | X16313 | 567    | B2M      |
| GSE40272 | X29131 | 11260  | XPOT     |
| GSE40272 | X39122 | 9987   | HNRPDL   |
| GSE40272 | X28274 | 9871   | SEC24D   |
| GSE40272 | X21039 | 79811  | SLTM     |
| GSE40272 | X4942  | 6513   | SLC2A1   |
| GSE40272 | X12802 | 2060   | EPS15    |
| GSE40272 | X5887  | 11179  | ZNF277   |
| GSE40272 | X31273 | 84191  | FAM96A   |
| GSE40272 | X30457 | 10487  | CAP1     |
| GSE40272 | X14858 | 2752   | GLUL     |
| GSE40272 | X7399  | 54467  | ANKIB1   |
| GSE40272 | X25292 | 7705   | ZNF146   |
| GSE40272 | X28774 | 567    | B2M      |
| GSE40272 | X44133 | 6741   | SSB      |
| GSE40272 | X37885 | 54469  | ZFAND6   |
| GSE40272 | X8339  | 159    | ADSS     |
| GSE40272 | X15440 | 483    | ATP1B3   |
| GSE40272 | X18927 | 6631   | SNRPC    |
| GSE40272 | X6549  | 84641  | HIATL1   |
| GSE40272 | X25976 | 5160   | PDHA1    |
| GSE40272 | X33802 | 567    | B2M      |
| GSE40272 | X28882 | 23219  | FBXO28   |
| GSE40272 | X20097 | 57001  | ACN9     |
| GSE40272 | X22290 | 63893  | UBE2O    |

# Supplementary\_table\_S2

|          |        |        |           |
|----------|--------|--------|-----------|
| GSE40272 | X18416 | 58515  | SELK      |
| GSE40272 | X27608 | 205327 | C2orf69   |
| GSE40272 | X31287 | 5721   | PSME2     |
| GSE40272 | X6806  | 26036  | ZNF451    |
| GSE40272 | X12092 | 8270   | LAGE3     |
| GSE40272 | X21995 | 998    | CDC42     |
| GSE40272 | X19940 | 7259   | TSPYL1    |
| GSE40272 | X35248 | 5687   | PSMA6     |
| GSE40272 | X32458 | 51136  | RNFT1     |
| GSE40272 | X41351 | 128    | ADH5      |
| GSE40272 | X25391 | 5917   | RARS      |
| GSE40272 | X35298 | 54888  | NSUN2     |
| GSE40272 | X25724 | 55051  | C14orf102 |
| GSE40272 | X42973 | 83636  | C19orf12  |
| GSE40272 | X19209 | 58505  | OSTC      |
| GSE40272 | X35784 | 7381   | UQCRB     |
| GSE40272 | X2289  | 85406  | DNAJC14   |
| GSE40272 | X29885 | 4801   | NFYB      |
| GSE40272 | X9667  | 30968  | STOML2    |
| GSE40272 | X32715 | 6432   | SRSF7     |
| GSE40272 | X13105 | 25874  | BRP44     |
| GSE40272 | X21987 | 3094   | HINT1     |
| GSE40272 | X32415 | 51125  | GOLGA7    |
| GSE40272 | X12042 | 10921  | RNPS1     |
| GSE40272 | X13734 | 94005  | PIGS      |
| GSE40272 | X30844 | 23463  | ICMT      |
| GSE40272 | X16522 | 10237  | SLC35B1   |
| GSE40272 | X41768 | 567    | B2M       |
| GSE40272 | X12049 | 8697   | CDC23     |
| GSE40272 | X27974 | 51808  | PHAX      |
| GSE40272 | X4300  | 150472 | CBWD2     |
| GSE40272 | X6143  | 6301   | SARS      |
| GSE40272 | X28433 | 9282   | MED14     |
| GSE40272 | X21617 | 10713  | USP39     |
| GSE40272 | X29318 | 51389  | RWDD1     |
| GSE40272 | X40450 | 2501   | FTH1P8    |
| GSE40272 | X38587 | 567    | B2M       |
| GSE40272 | X31373 | 473    | RERE      |
| GSE40272 | X22390 | 10241  | CALCOCO2  |
| GSE40272 | X38267 | 23001  | WDFY3     |
| GSE40272 | X29191 | 79036  | C19orf50  |
| GSE40272 | X33392 | 84084  | RAB6C     |
| GSE40272 | X22262 | 23505  | TMEM131   |
| GSE40272 | X28120 | 9107   | MTMR6     |
| GSE40272 | X805   | 7170   | TPM3      |
| GSE40272 | X32279 | 129285 | KLRAQ1    |
| GSE40272 | X42282 | 3417   | IDH1      |
| GSE40272 | X15431 | 488    | ATP2A2    |
| GSE40272 | X25026 | 8887   | TAX1BP1   |
| GSE40272 | X21427 | 3151   | HMG2      |
| GSE40272 | X23919 | 56930  | LOC56930  |
| GSE40272 | X5314  | 9556   | C14orf2   |
| GSE40272 | X35829 | 521    | ATP5I     |

# Supplementary\_table\_S2

|          |        |        |           |
|----------|--------|--------|-----------|
| GSE40272 | X15250 | 23585  | TMEM50A   |
| GSE40272 | X42882 | 3895   | KTN1      |
| GSE40272 | X10488 | 824    | CAPN2     |
| GSE40272 | X13389 | 567    | B2M       |
| GSE40272 | X20251 | 22936  | ELL2      |
| GSE40272 | X27867 | 51187  | RSL24D1   |
| GSE40272 | X21564 | 144871 | LOC144871 |
| GSE40272 | X39193 | 8503   | PIK3R3    |
| GSE40272 | X15435 | 11143  | KAT7      |
| GSE40272 | X43802 | 84255  | SLC37A3   |
| GSE40272 | X8658  | 8533   | COPS3     |
| GSE40272 | X19806 | 8284   | KDM5D     |
| GSE40272 | X8803  | 64801  | ARV1      |
| GSE40272 | X39209 | 375743 | PTAR1     |
| GSE40272 | X6723  | 2958   | GTF2A2    |
| GSE40272 | X4805  | 10987  | COPS5     |
| GSE40272 | X6969  | 51014  | TMED7     |
| GSE40272 | X1271  | 22803  | XRN2      |
| GSE40272 | X18535 | 54949  | SDHAF2    |
| GSE40272 | X6248  | 55327  | LIN7C     |
| GSE40272 | X13743 | 58478  | ENOPH1    |
| GSE40272 | X19798 | 84295  | PHF6      |
| GSE40272 | X30577 | 3181   | HNRNPA2B1 |
| GSE40272 | X3473  | 1345   | COX6C     |
| GSE40272 | X26286 | 8446   | DUSP11    |
| GSE40272 | X36667 | 9867   | PJA2      |
| GSE40272 | X43298 | 55852  | TEX2      |
| GSE40272 | X43503 | 26953  | RANBP6    |
| GSE40272 | X37150 | 439982 | LOC439982 |
| GSE40272 | X42797 | 79086  | C19orf42  |
| GSE40272 | X10073 | 55829  | SELS      |
| GSE40272 | X25965 | 11328  | FKBP9     |
| GSE40272 | X13360 | 51119  | SBDS      |
| GSE40272 | X1239  | 54464  | XRN1      |
| GSE40272 | X44026 | 3858   | KRT10     |
| GSE40272 | X32167 | 4090   | SMAD5     |
| GSE40272 | X28709 | 1982   | EIF4G2    |
| GSE40272 | X22167 | 7982   | ST7       |
| GSE40272 | X32065 | 3187   | HNRNPH1   |
| GSE40272 | X14385 | 694    | BTG1      |
| GSE40272 | X32516 | 23204  | ARL6IP1   |
| GSE40272 | X7972  | 25879  | DCAF13    |
| GSE40272 | X13923 | 567    | B2M       |
| GSE40272 | X28239 | 567    | B2M       |
| GSE40272 | X8671  | 1389   | CREBL2    |
| GSE40272 | X25452 | 6389   | SDHA      |
| GSE40272 | X19797 | 6729   | SRP54     |
| GSE40272 | X26556 | 26355  | FAM162A   |
| GSE40272 | X11243 | 51264  | MRPL27    |
| GSE40272 | X11861 | 9836   | LCMT2     |
| GSE40272 | X40686 | 26133  | TRPC4AP   |
| GSE40272 | X42505 | 9989   | PPP4R1    |
| GSE40272 | X37709 | 8655   | DYNLL1    |

# Supplementary\_table\_S2

|          |        |        |           |
|----------|--------|--------|-----------|
| GSE40272 | X39351 | 6838   | SURF6     |
| GSE40272 | X22170 | 284207 | METRNL    |
| GSE40272 | X22304 | 805    | CALM2     |
| GSE40272 | X9118  | 1345   | COX6C     |
| GSE40272 | X36668 | 10787  | NCKAP1    |
| GSE40272 | X11557 | 57505  | AARS2     |
| GSE40272 | X39099 | 23390  | ZDHHC17   |
| GSE40272 | X43203 | 388345 | LOC388345 |
| GSE40272 | X23585 | 2110   | ETFDH     |
| GSE40272 | X31575 | 3988   | LIPA      |
| GSE40272 | X23810 | 58487  | CREBZF    |
| GSE40272 | X16270 | 54882  | ANKHD1    |
| GSE40272 | X31427 | 84817  | TXNDC17   |
| GSE40272 | X13307 | 390916 | NUDT19    |
| GSE40272 | X9026  | 9581   | PREPL     |
| GSE40272 | X32416 | 55967  | NDUFA12   |
| GSE40272 | X27591 | 57062  | DDX24     |
| GSE40272 | X8394  | 10600  | USP16     |
| GSE40272 | X37691 | 23741  | EID1      |
| GSE40272 | X27525 | 253943 | YTHDF3    |
| GSE40272 | X7037  | 6185   | RPN2      |
| GSE40272 | X32206 | 805    | CALM2     |
| GSE40272 | X28560 | 55163  | PNPO      |
| GSE40272 | X3266  | 5908   | RAP1B     |
| GSE40272 | X26315 | 9895   | TECPR2    |
| GSE40272 | X32532 | 29803  | REPIN1    |
| GSE40272 | X8785  | 10531  | PITRM1    |
| GSE40272 | X27449 | 6389   | SDHA      |
| GSE40272 | X42657 | 9371   | KIF3B     |
| GSE40272 | X18145 | 284672 | PTGES3P   |
| GSE40272 | X41305 | 80829  | ZFP91     |
| GSE40272 | X8836  | 23637  | RABGAP1   |
| GSE40272 | X10921 | 81688  | C6orf62   |
| GSE40272 | X36610 | 9325   | TRIP4     |
| GSE40272 | X36760 | 9184   | BUB3      |
| GSE40272 | X43977 | 10776  | ARPP19    |
| GSE40272 | X3267  | 10473  | HMGNA4    |
| GSE40272 | X38721 | 9443   | MED7      |
| GSE40272 | X32154 | 8559   | PRPF18    |
| GSE40272 | X32508 | 84973  | SNHG7     |
| GSE40272 | X43620 | 567    | B2M       |
| GSE40272 | X41804 | 23412  | COMMD3    |
| GSE40272 | X6904  | 7458   | EIF4H     |
| GSE40272 | X35500 | 8776   | MTMR1     |
| GSE40272 | X21463 | 130535 | KCTD18    |
| GSE40272 | X23747 | 27249  | MMADHC    |
| GSE40272 | X37286 | 29081  | METTL5    |
| GSE40272 | X12918 | 740    | MRPL49    |
| GSE40272 | X1649  | 7511   | XPNPEP1   |
| GSE40272 | X35321 | 1434   | CSE1L     |
| GSE40272 | X41231 | 567    | B2M       |
| GSE40272 | X34541 | 6235   | RPS29     |
| GSE40272 | X19296 | 55837  | EAPP      |

# Supplementary\_table\_S2

|          |        |        |           |
|----------|--------|--------|-----------|
| GSE40272 | X42485 | 663    | BNIP2     |
| GSE40272 | X40058 | 56942  | C16orf61  |
| GSE40272 | X13425 | 8725   | C19orf2   |
| GSE40272 | X16504 | 51105  | PHF20L1   |
| GSE40272 | X30599 | 7803   | PTP4A1    |
| GSE40272 | X38326 | 64784  | CRTC3     |
| GSE40272 | X34735 | 567    | B2M       |
| GSE40272 | X5897  | 23176  | SEPT8     |
| GSE40272 | X40570 | 3275   | PRMT2     |
| GSE40272 | X41244 | 85379  | KIAA1671  |
| GSE40272 | X30777 | 10550  | ARL6IP5   |
| GSE40272 | X18930 | 10073  | SNUPN     |
| GSE40272 | X7024  | 8550   | MAPKAPK5  |
| GSE40272 | X41282 | 54664  | TMEM106B  |
| GSE40272 | X875   | 6780   | STAU1     |
| GSE40272 | X29830 | 10575  | CCT4      |
| GSE40272 | X36433 | 27089  | UQCRQ     |
| GSE40272 | X3944  | 4724   | NDUFS4    |
| GSE40272 | X24845 | 2887   | GRB10     |
| GSE40272 | X8679  | 26272  | FBXO4     |
| GSE40272 | X21377 | 6386   | SDCBP     |
| GSE40272 | X36379 | 1452   | CSNK1A1   |
| GSE40272 | X4186  | 84272  | YIPF4     |
| GSE40272 | X11332 | 9086   | EIF1AY    |
| GSE40272 | X36274 | 10094  | ARPC3     |
| GSE40272 | X7170  | 8295   | TRRAP     |
| GSE40272 | X305   | 10513  | APPBP2    |
| GSE40272 | X42997 | 54832  | VPS13C    |
| GSE40272 | X39521 | 388642 | LOC388642 |
| GSE40272 | X39781 | 51642  | MRPL48    |
| GSE40272 | X40958 | 7324   | UBE2E1    |
| GSE40272 | X25060 | 567    | B2M       |
| GSE40272 | X38952 | 7334   | UBE2N     |
| GSE40272 | X20059 | 1603   | DAD1      |
| GSE40272 | X10197 | 26128  | KIAA1279  |
| GSE40272 | X41070 | 307    | ANXA4     |
| GSE40272 | X30743 | 285636 | C5orf51   |
| GSE40272 | X20372 | 5218   | CDK14     |
| GSE40272 | X15757 | 25926  | NOL11     |
| GSE40272 | X40384 | 10140  | TOB1      |
| GSE40272 | X43572 | 4594   | MUT       |
| GSE40272 | X3830  | 9646   | CTR9      |
| GSE40272 | X27323 | 6730   | SRP68     |
| GSE40272 | X20838 | 51451  | LCMT1     |
| GSE40272 | X22184 | 60     | ACTB      |
| GSE40272 | X41409 | 9533   | POLR1C    |
| GSE40272 | X37307 | 2590   | GALNT2    |
| GSE40272 | X40140 | 79672  | FN3KRP    |
| GSE40272 | X24522 | 567    | B2M       |
| GSE40272 | X18119 | 51466  | EVL       |
| GSE40272 | X39969 | 79081  | C11orf48  |
| GSE40272 | X31018 | 6389   | SDHA      |
| GSE40272 | X16977 | 134510 | UBLCP1    |



# Supplementary\_table\_S2

|          |        |        |           |
|----------|--------|--------|-----------|
| GSE40272 | X32072 | 6950   | TCP1      |
| GSE40272 | X28604 | 10096  | ACTR3     |
| GSE40272 | X26143 | 203068 | TUBB      |
| GSE40272 | X41383 | 10944  | C11orf58  |
| GSE40272 | X32170 | 10899  | JTB       |
| GSE40272 | X31352 | 523    | ATP6V1A   |
| GSE40272 | X2022  | 5134   | PDCD2     |
| GSE40272 | X41092 | 28998  | MRPL13    |
| GSE40272 | X32533 | 8933   | FAM127A   |
| GSE40272 | X2406  | 1349   | COX7B     |
| GSE40272 | X31386 | 4725   | NDUFS5    |
| GSE40272 | X11654 | 10971  | YWHAQ     |
| GSE40272 | X13116 | 23560  | GTPBP4    |
| GSE40272 | X15083 | 10142  | AKAP9     |
| GSE40272 | X36426 | 2885   | GRB2      |
| GSE40272 | X20075 | 5721   | PSME2     |
| GSE40272 | X4579  | 9857   | CEP350    |
| GSE40272 | X25569 | 390956 | LOC390956 |
| GSE40272 | X35706 | 27248  | ERLEC1    |
| GSE40272 | X14997 | 7076   | TIMP1     |
| GSE40272 | X19894 | 81853  | TMEM14B   |
| GSE40272 | X35755 | 23041  | MON2      |
| GSE40272 | X24083 | 51010  | EXOSC3    |
| GSE40272 | X29522 | 84186  | ZCCHC7    |
| GSE40272 | X37526 | 7458   | EIF4H     |
| GSE40272 | X37798 | 4702   | NDUFA8    |
| GSE40272 | X42077 | 80267  | EDEM3     |
| GSE40272 | X44522 | 9883   | POM121    |
| GSE40272 | X36278 | 2224   | FDPS      |
| GSE40272 | X30668 | 2332   | FMR1      |
| GSE40272 | X35006 | 124808 | CCDC43    |
| GSE40272 | X33647 | 5925   | RB1       |
| GSE40272 | X2274  | 10618  | TGOLN2    |
| GSE40272 | X14436 | 59286  | UBL5      |
| GSE40272 | X27526 | 26959  | HBP1      |
| GSE40272 | X30580 | 56252  | YLPM1     |
| GSE40272 | X22612 | 79157  | MFSD11    |
| GSE40272 | X16752 | 64110  | MAGEF1    |
| GSE40272 | X40270 | 9296   | ATP6V1F   |
| GSE40272 | X28556 | 153830 | RNF145    |
| GSE40272 | X36778 | 3183   | HNRNPC    |
| GSE40272 | X17705 | 51009  | DERL2     |
| GSE40272 | X29048 | 8408   | ULK1      |
| GSE40272 | X15753 | 51807  | TUBA8     |
| GSE40272 | X39562 | 10447  | FAM3C     |
| GSE40272 | X16226 | 4853   | NOTCH2    |
| GSE40272 | X17489 | 84892  | C3orf39   |
| GSE40272 | X25048 | 55862  | ECHDC1    |
| GSE40272 | X31800 | 54989  | ZNF770    |
| GSE40272 | X26573 | 54925  | ZNF434    |
| GSE40272 | X27968 | 92305  | TMEM129   |
| GSE40272 | X20076 | 7534   | YWHAZ     |
| GSE40272 | X37882 | 9584   | RBM39     |

# Supplementary\_table\_S2

|          |        |        |           |
|----------|--------|--------|-----------|
| GSE40272 | X42193 | 11112  | HIBADH    |
| GSE40272 | X42410 | 10413  | YAP1      |
| GSE40272 | X36206 | 79176  | FBXL15    |
| GSE40272 | X12829 | 6227   | RPS21     |
| GSE40272 | X25101 | 2739   | GLO1      |
| GSE40272 | X2983  | 26268  | FBXO9     |
| GSE40272 | X8365  | 8726   | EED       |
| GSE40272 | X36838 | 170622 | COMMD6    |
| GSE40272 | X8215  | 754    | PTTG1IP   |
| GSE40272 | X20049 | 90843  | TCEAL8    |
| GSE40272 | X13160 | 51019  | CCDC53    |
| GSE40272 | X900   | 25912  | C1orf43   |
| GSE40272 | X41115 | 57599  | WDR48     |
| GSE40272 | X23947 | 23451  | SF3B1     |
| GSE40272 | X9650  | 81545  | FBXO38    |
| GSE40272 | X18141 | 5786   | PTPRA     |
| GSE40272 | X16142 | 3190   | HNRNPK    |
| GSE40272 | X36834 | 51634  | RBMX2     |
| GSE40272 | X23244 | 23271  | CAMSAP2   |
| GSE40272 | X27625 | 9728   | SECISBP2L |
| GSE40272 | X6847  | 8661   | EIF3A     |
| GSE40272 | X22721 | 51455  | REV1      |
| GSE40272 | X5633  | 83707  | TRPT1     |
| GSE40272 | X11983 | 51399  | TRAPPC4   |
| GSE40272 | X5584  | 25814  | ATXN10    |
| GSE40272 | X28607 | 342125 | TMC3      |
| GSE40272 | X33682 | 254225 | RNF169    |
| GSE40272 | X20352 | 84191  | FAM96A    |
| GSE40272 | X5434  | 9117   | SEC22C    |
| GSE40272 | X10717 | 56910  | STARD7    |
| GSE40272 | X29395 | 51699  | VPS29     |
| GSE40272 | X28991 | 54439  | RBM27     |
| GSE40272 | X38090 | 10966  | RAB40B    |
| GSE40272 | X13278 | 8454   | CUL1      |
| GSE40272 | X26916 | 6389   | SDHA      |
| GSE40272 | X37431 | 84181  | CHD6      |
| GSE40272 | X25354 | 10980  | COPS6     |
| GSE40272 | X5395  | 23344  | ESYT1     |
| GSE40272 | X1480  | 150580 | LOC150580 |
| GSE40272 | X4262  | 6418   | SET       |
| GSE40272 | X12603 | 6389   | SDHA      |
| GSE40272 | X42251 | 26146  | TRAF3IP1  |
| GSE40272 | X6007  | 57129  | MRPL47    |
| GSE40272 | X37096 | 56339  | METTTL3   |
| GSE40272 | X6872  | 5987   | TRIM27    |
| GSE40272 | X5188  | 6767   | ST13      |
| GSE40272 | X14387 | 1315   | COPB1     |
| GSE40272 | X28245 | 4267   | CD99      |
| GSE40272 | X39972 | 285172 | FAM126B   |
| GSE40272 | X42995 | 55330  | CNO       |
| GSE40272 | X8216  | 7982   | ST7       |
| GSE40272 | X9888  | 55958  | KLHL9     |
| GSE40272 | X19356 | 54880  | BCOR      |

# Supplementary\_table\_S2

|          |        |          |           |
|----------|--------|----------|-----------|
| GSE40272 | X38399 | 26175    | C14orf109 |
| GSE40272 | X20395 | 292      | SLC25A5   |
| GSE40272 | X28853 | 51123    | ZNF706    |
| GSE40272 | X27256 | 23341    | DNAJC16   |
| GSE40272 | X29285 | 25798    | BRI3      |
| GSE40272 | X31292 | 7533     | YWHAH     |
| GSE40272 | X33420 | 5861     | RAB1A     |
| GSE40272 | X32882 | 146053   | RPS3AP47  |
| GSE40272 | X31893 | 8826     | IQGAP1    |
| GSE40272 | X20001 | 3550     | IK        |
| GSE40272 | X6701  | 375113   | PPIAL3    |
| GSE40272 | X29674 | 6902     | TBCA      |
| GSE40272 | X31975 | 8724     | SNX3      |
| GSE40272 | X43426 | 10975    | UQCR11    |
| GSE40272 | X30064 | 441561   | LOC441561 |
| GSE40272 | X24065 | 51780    | KDM3B     |
| GSE40272 | X37001 | 509      | ATP5C1    |
| GSE40272 | X40399 | 56254    | RNF20     |
| GSE40272 | X38597 | 51441    | YTHDF2    |
| GSE40272 | X37143 | 56270    | WDR45L    |
| GSE40272 | X2195  | 51474    | LIMA1     |
| GSE40272 | X34936 | 64841    | GNPNAT1   |
| GSE40272 | X39910 | 6389     | SDHA      |
| GSE40272 | X19327 | 442589   | LOC442589 |
| GSE40272 | X31304 | 60682    | SMAP1     |
| GSE40272 | X39194 | 9061     | PAPSS1    |
| GSE40272 | X44323 | 5440     | POLR2K    |
| GSE40272 | X21024 | 56674    | TMEM9B    |
| GSE40272 | X21622 | 51290    | ERGIC2    |
| GSE40272 | X18796 | 113402   | SFT2D1    |
| GSE40272 | X37668 | 84888    | SPPL2A    |
| GSE40272 | X22087 | 4259     | MGST3     |
| GSE40272 | X38946 | 9950     | GOLGA5    |
| GSE40272 | X33415 | 60       | ACTB      |
| GSE40272 | X20006 | 10632    | ATP5L     |
| GSE40272 | X43935 | 9791     | PTDSS1    |
| GSE40272 | X14891 | 23658    | LSM5      |
| GSE40272 | X10815 | 51691    | NAA38     |
| GSE40272 | X27238 | 64924    | SLC30A5   |
| GSE40272 | X14750 | 8334     | HIST1H2AC |
| GSE40272 | X40128 | 55364    | IMPACT    |
| GSE40272 | X6805  | 1964     | EIF1AX    |
| GSE40272 | X6720  | 5511     | PPP1R8    |
| GSE40272 | X24722 | 9991     | ROD1      |
| GSE40272 | X13458 | 8565     | YARS      |
| GSE40272 | X7052  | 9167     | COX7A2L   |
| GSE40272 | X11297 | 5,00E+03 | ORC4      |
| GSE40272 | X31532 | 2970     | GTF2IP1   |
| GSE40272 | X26749 | 441542   | LOC441542 |
| GSE40272 | X36168 | 60485    | SAV1      |
| GSE40272 | X10038 | 27238    | GPKOW     |
| GSE40272 | X30214 | 989      | SEPT7     |
| GSE40272 | X34479 | 8481     | OFD1      |

# Supplementary\_table\_S2

|          |        |        |           |
|----------|--------|--------|-----------|
| GSE40272 | X27921 | 5478   | PPIA      |
| GSE40272 | X32620 | 6464   | SHC1      |
| GSE40272 | X2909  | 4048   | LTA4H     |
| GSE40272 | X15794 | 539    | ATP5O     |
| GSE40272 | X2413  | 25980  | C20orf4   |
| GSE40272 | X31097 | 64343  | AZI2      |
| GSE40272 | X37404 | 63931  | MRPS14    |
| GSE40272 | X27586 | 9741   | LAPTM4A   |
| GSE40272 | X12207 | 79018  | C17orf39  |
| GSE40272 | X20490 | 6993   | DYNLT1    |
| GSE40272 | X24648 | 389156 | RPL21P39  |
| GSE40272 | X24346 | 8763   | CD164     |
| GSE40272 | X17710 | 6675   | UAP1      |
| GSE40272 | X17608 | 59343  | SENP2     |
| GSE40272 | X10799 | 9782   | MATR3     |
| GSE40272 | X11119 | 54458  | PRR13     |
| GSE40272 | X32886 | 7114   | TMSB4X    |
| GSE40272 | X1839  | 5756   | TWF1      |
| GSE40272 | X25059 | 6389   | SDHA      |
| GSE40272 | X19290 | 4830   | NME1      |
| GSE40272 | X11681 | 83955  | NACAP1    |
| GSE40272 | X20033 | 390498 | LOC390498 |
| GSE40272 | X6028  | 64072  | CDH23     |
| GSE40272 | X13133 | 25977  | NECAP1    |
| GSE40272 | X14269 | 3927   | LASP1     |
| GSE40272 | X42040 | 10531  | PITRM1    |
| GSE40272 | X42278 | 10951  | CBX1      |
| GSE40272 | X39097 | 8939   | FUBP3     |
| GSE40272 | X21883 | 6389   | SDHA      |
| GSE40272 | X27817 | 6917   | TCEA1     |
| GSE40272 | X2760  | 5832   | ALDH18A1  |
| GSE40272 | X44408 | 55707  | NECAP2    |
| GSE40272 | X35244 | 3329   | HSPD1     |
| GSE40272 | X43213 | 3476   | IGBP1     |
| GSE40272 | X2416  | 51566  | ARMCX3    |
| GSE40272 | X43280 | 6391   | SDHC      |
| GSE40272 | X21001 | 55437  | STRADB    |
| GSE40272 | X44004 | 2971   | GTF3A     |
| GSE40272 | X28459 | 254225 | RNF169    |
| GSE40272 | X41135 | 23389  | MED13L    |
| GSE40272 | X30745 | 10617  | STAMPB    |
| GSE40272 | X36475 | 3920   | LAMP2     |
| GSE40272 | X14466 | 440577 | LOC440577 |
| GSE40272 | X31543 | 57561  | ARRDC3    |
| GSE40272 | X38543 | 7155   | TOP2B     |
| GSE40272 | X33090 | 5128   | CDK17     |
| GSE40272 | X39585 | 54918  | CMTM6     |
| GSE40272 | X12070 | 6389   | SDHA      |
| GSE40272 | X12096 | 3476   | IGBP1     |
| GSE40272 | X8694  | 9794   | MAML1     |
| GSE40272 | X19509 | 26235  | FBXL4     |
| GSE40272 | X1292  | 26065  | LSM14A    |
| GSE40272 | X39443 | 23077  | MYCBP2    |

# Supplementary\_table\_S2

|          |        |        |           |
|----------|--------|--------|-----------|
| GSE40272 | X17589 | 7251   | TSG101    |
| GSE40272 | X15122 | 23673  | STX12     |
| GSE40272 | X8457  | 2342   | FNTB      |
| GSE40272 | X37980 | 56947  | MFF       |
| GSE40272 | X39100 | 26060  | APPL1     |
| GSE40272 | X18173 | 6185   | RPN2      |
| GSE40272 | X8417  | 10797  | MTHFD2    |
| GSE40272 | X30939 | 5007   | OSBP      |
| GSE40272 | X40548 | 55100  | WDR70     |
| GSE40272 | X41117 | 10217  | CTDSPL    |
| GSE40272 | X20828 | 6118   | RPA2      |
| GSE40272 | X31031 | 7386   | UQCRFS1   |
| GSE40272 | X8237  | 3281   | HSBP1     |
| GSE40272 | X27432 | 83787  | ARMC10    |
| GSE40272 | X42347 | 4077   | NBR1      |
| GSE40272 | X11864 | 8455   | ATRN      |
| GSE40272 | X33289 | 442133 | LOC442133 |
| GSE40272 | X18900 | 7405   | UVRAG     |
| GSE40272 | X31754 | 3020   | H3F3A     |
| GSE40272 | X36505 | 1665   | DHX15     |
| GSE40272 | X20549 | 80777  | CYB5B     |
| GSE40272 | X26944 | 54874  | FNBP1L    |
| GSE40272 | X44431 | 10284  | SAP18     |
| GSE40272 | X28460 | 2802   | GOLGA3    |
| GSE40272 | X22832 | 6434   | TRA2B     |
| GSE40272 | X28554 | 9236   | CCPG1     |
| GSE40272 | X43886 | 1738   | DLD       |
| GSE40272 | X30975 | 23568  | ARL2BP    |
| GSE40272 | X23940 | 134505 | LOC134505 |
| GSE40272 | X12665 | 900    | CCNG1     |
| GSE40272 | X27819 | 4299   | AFF1      |
| GSE40272 | X5191  | 539    | ATP5O     |
| GSE40272 | X13896 | 5930   | RBBP6     |
| GSE40272 | X42047 | 23379  | KIAA0947  |
| GSE40272 | X12284 | 23270  | TSPYL4    |
| GSE40272 | X42297 | 7534   | YWHAZ     |
| GSE40272 | X29685 | 23013  | SPEN      |
| GSE40272 | X42714 | 22826  | DNAJC8    |
| GSE40272 | X31138 | 6635   | SNRPE     |
| GSE40272 | X5330  | 533    | ATP6V0B   |
| GSE40272 | X28428 | 11143  | KAT7      |
| GSE40272 | X17512 | 94239  | H2AFV     |
| GSE40272 | X40492 | 6164   | RPL34     |
| GSE40272 | X37097 | 11152  | WDR45     |
| GSE40272 | X29943 | 79718  | TBL1XR1   |
| GSE40272 | X27427 | 1431   | CS        |
| GSE40272 | X3492  | 5441   | POLR2L    |
| GSE40272 | X41193 | 829    | CAPZA1    |
| GSE40272 | X7082  | 2504   | FTH1P12   |
| GSE40272 | X44163 | 1974   | EIF4A2    |
| GSE40272 | X30767 | 6651   | SON       |
| GSE40272 | X7083  | 440525 | LOC440525 |
| GSE40272 | X27810 | 9748   | SLK       |

# Supplementary\_table\_S2

|          |        |        |           |
|----------|--------|--------|-----------|
| GSE40272 | X5151  | 57504  | MTA3      |
| GSE40272 | X25046 | 285086 | LOC285086 |
| GSE40272 | X23512 | 6309   | SC5DL     |
| GSE40272 | X39517 | 6185   | RPN2      |
| GSE40272 | X21711 | 3324   | HSP90AA2  |
| GSE40272 | X36593 | 23399  | CTDNEP1   |
| GSE40272 | X16121 | 51246  | SHISA5    |
| GSE40272 | X30002 | 1859   | DYRK1A    |
| GSE40272 | X33020 | 6389   | SDHA      |
| GSE40272 | X17381 | 2926   | GRSF1     |
| GSE40272 | X37786 | 51651  | PTRH2     |
| GSE40272 | X30630 | 6389   | SDHA      |
| GSE40272 | X8889  | 6389   | SDHA      |
| GSE40272 | X15944 | 8899   | PRPF4B    |
| GSE40272 | X38083 | 10890  | RAB10     |
| GSE40272 | X43310 | 51699  | VPS29     |
| GSE40272 | X37634 | 26292  | MYCBP     |
| GSE40272 | X42433 | 9491   | PSMF1     |
| GSE40272 | X19958 | 51542  | VPS54     |
| GSE40272 | X19493 | 6389   | SDHA      |
| GSE40272 | X8865  | 1595   | CYP51A1   |
| GSE40272 | X7942  | 51119  | SBDS      |
| GSE40272 | X40616 | 55486  | PARL      |
| GSE40272 | X20543 | 8720   | MBTPS1    |
| GSE40272 | X32866 | 152137 | CCDC50    |
| GSE40272 | X5307  | 5814   | PURB      |
| GSE40272 | X40105 | 55651  | NHP2      |
| GSE40272 | X4860  | 23118  | TAB2      |
| GSE40272 | X18222 | 7417   | VDAC2     |
| GSE40272 | X39733 | 23326  | USP22     |
| GSE40272 | X17694 | 80145  | THOC7     |
| GSE40272 | X21135 | 54497  | HEATR5B   |
| GSE40272 | X6157  | 400452 | LOC400452 |
| GSE40272 | X17801 | 51693  | TRAPPC2L  |
| GSE40272 | X37840 | 6897   | TARS      |
| GSE40272 | X39387 | 57804  | POLD4     |
| GSE40272 | X42274 | 440866 | LOC440866 |
| GSE40272 | X6667  | 9552   | SPAG7     |
| GSE40272 | X7007  | 51081  | MRPS7     |
| GSE40272 | X28042 | 29121  | CLEC2D    |
| GSE40272 | X35814 | 10054  | UBA2      |
| GSE40272 | X14610 | 23386  | NUDCD3    |
| GSE40272 | X27815 | 64756  | ATPAF1    |
| GSE40272 | X38000 | 65117  | RSRC2     |
| GSE40272 | X24411 | 4700   | NDUFA6    |
| GSE40272 | X26450 | 119504 | ANAPC16   |
| GSE40272 | X27136 | 7514   | XPO1      |
| GSE40272 | X40431 | 84893  | FBXO18    |
| GSE40272 | X10048 | 498    | ATP5A1    |
| GSE40272 | X31874 | 84661  | DPY30     |
| GSE40272 | X14471 | 9446   | GSTO1     |
| GSE40272 | X22938 | 51493  | C22orf28  |
| GSE40272 | X25364 | 29979  | UBQLN1    |

# Supplementary\_table\_S2

|          |        |        |           |
|----------|--------|--------|-----------|
| GSE40272 | X35625 | 2107   | ETF1      |
| GSE40272 | X16321 | 26520  | TIMM9     |
| GSE40272 | X23673 | 64083  | GOLPH3    |
| GSE40272 | X23715 | 10694  | CCT8      |
| GSE40272 | X2272  | 25793  | FBXO7     |
| GSE40272 | X20371 | 4848   | CNOT2     |
| GSE40272 | X36810 | 9512   | PMPCB     |
| GSE40272 | X4530  | 221154 | EFHA1     |
| GSE40272 | X19037 | 6117   | RPA1      |
| GSE40272 | X44168 | 388532 | RPL21P131 |
| GSE40272 | X1444  | 7323   | UBE2D3    |
| GSE40272 | X16380 | 223    | ALDH9A1   |
| GSE40272 | X31028 | 5757   | PTMA      |
| GSE40272 | X6479  | 54543  | TOMM7     |
| GSE40272 | X28922 | 55197  | RPRD1A    |
| GSE40272 | X37311 | 79602  | ADIPOR2   |
| GSE40272 | X34522 | 10277  | UBE4B     |
| GSE40272 | X19909 | 55039  | TRMT12    |
| GSE40272 | X38633 | 4831   | NME2      |
| GSE40272 | X26962 | 10641  | NPRL2     |
| GSE40272 | X18678 | 10120  | ACTR1B    |
| GSE40272 | X36196 | 6389   | SDHA      |
| GSE40272 | X18579 | 10959  | TMED2     |
| GSE40272 | X26810 | 122704 | MRPL52    |
| GSE40272 | X38599 | 10728  | PTGES3    |
| GSE40272 | X12545 | 79893  | GGNBP2    |
| GSE40272 | X21930 | 4904   | YBX1      |
| GSE40272 | X42384 | 8992   | ATP6V0E1  |
| GSE40272 | X20823 | 29117  | BRD7      |
| GSE40272 | X29890 | 5202   | PFDN2     |
| GSE40272 | X31684 | 50854  | C6orf48   |
| GSE40272 | X25333 | 4717   | NDUFC1    |
| GSE40272 | X5044  | 1781   | DYNC1I2   |
| GSE40272 | X22586 | 3098   | HK1       |
| GSE40272 | X43367 | 55272  | IMP3      |
| GSE40272 | X44284 | 5538   | PPT1      |
| GSE40272 | X20168 | 60488  | MRPS35    |
| GSE40272 | X8897  | 5706   | PSMC6     |
| GSE40272 | X43091 | 2339   | FNTA      |
| GSE40272 | X22743 | 9874   | TLK1      |
| GSE40272 | X41993 | 51247  | PAIP2     |
| GSE40272 | X26262 | 7764   | ZNF217    |
| GSE40272 | X24967 | 60     | ACTB      |
| GSE40272 | X35658 | 6389   | SDHA      |
| GSE40272 | X36729 | 6389   | SDHA      |
| GSE40272 | X516   | 376    | ARF2      |
| GSE40272 | X34173 | 442441 | LOC442441 |
| GSE40272 | X6335  | 439953 | LOC439953 |
| GSE40272 | X10074 | 51199  | NIN       |
| GSE40272 | X28544 | 8813   | DPM1      |
| GSE40272 | X34029 | 57169  | ZNFX1     |
| GSE40272 | X5260  | 29074  | MRPL18    |
| GSE40272 | X44207 | 6613   | SUMO2     |

# Supplementary\_table\_S2

|          |        |                  |
|----------|--------|------------------|
| GSE40272 | X15434 | 4738 NEDD8       |
| GSE40272 | X19076 | 10552 ARPC1A     |
| GSE40272 | X27620 | 84280 BTBD10     |
| GSE40272 | X17636 | 6389 SDHA        |
| GSE40272 | X41951 | 64689 GORASP1    |
| GSE40272 | X18169 | 6389 SDHA        |
| GSE40272 | X21183 | 11017 SNRNP27    |
| GSE40272 | X17741 | 5686 PSMA5       |
| GSE40272 | X20586 | 6647 SOD1        |
| GSE40272 | X22970 | 2130 EWSR1       |
| GSE40272 | X9232  | 51082 POLR1D     |
| GSE40272 | X37099 | 9296 ATP6V1F     |
| GSE40272 | X6943  | 4077 NBR1        |
| GSE40272 | X27719 | 51255 RNF181     |
| GSE40272 | X3652  | 6709 SPTAN1      |
| GSE40272 | X44413 | 29979 UBQLN1     |
| GSE40272 | X23365 | 51255 RNF181     |
| GSE40272 | X27098 | 10197 PSME3      |
| GSE40272 | X1439  | 57095 PITHD1     |
| GSE40272 | X37676 | 2071 ERCC3       |
| GSE40272 | X40876 | 26985 AP3M1      |
| GSE40272 | X8832  | 1997 ELF1        |
| GSE40272 | X26606 | 582 BBS1         |
| GSE40272 | X38069 | 27068 PPA2       |
| GSE40272 | X40975 | 114883 OSBPL9    |
| GSE40272 | X17665 | 6138 RPL15       |
| GSE40272 | X32464 | 2497 FTH1P2      |
| GSE40272 | X31163 | 6389 SDHA        |
| GSE40272 | X8139  | 23191 CYFIP1     |
| GSE40272 | X30607 | 9939 RBM8A       |
| GSE40272 | X17071 | 8683 SRSF9       |
| GSE40272 | X30458 | 4673 NAP1L1      |
| GSE40272 | X39379 | 1998 ELF2        |
| GSE40272 | X39489 | 4299 AFF1        |
| GSE40272 | X35747 | 1540 CYLD        |
| GSE40272 | X42361 | 9276 COPB2       |
| GSE40272 | X17296 | 55577 NAGK       |
| GSE40272 | X20026 | 6389 SDHA        |
| GSE40272 | X15450 | 10724 MGEA5      |
| GSE40272 | X35055 | 5701 PSMC2       |
| GSE40272 | X40047 | 119358 SNRNP2P1  |
| GSE40272 | X6155  | 150928 PTMAP5    |
| GSE40272 | X15720 | 55505 NOP10      |
| GSE40272 | X22647 | 84945 ABHD13     |
| GSE40272 | X15805 | 539 ATP5O        |
| GSE40272 | X34684 | 442060 LOC442060 |
| GSE40272 | X37342 | 51185 CRBN       |
| GSE40272 | X36595 | 2547 XRCC6       |
| GSE40272 | X5873  | 3185 HNRNPF      |
| GSE40272 | X26549 | 7528 YY1         |
| GSE40272 | X8610  | 54940 OCIAD1     |
| GSE40272 | X40057 | 51667 NUB1       |
| GSE40272 | X25626 | 4701 NDUFA7      |



# Supplementary\_table\_S2

|          |              |           |              |
|----------|--------------|-----------|--------------|
| GSE40272 | X33814       | 6222      | RPS18        |
| GSE40272 | X15863       | 6144      | RPL21        |
| GSE40272 | X38329       | 29110     | TBK1         |
| GSE40272 | X35009       | 9419      | CRIP1        |
| GSE40272 | X24160       | 5584      | PRKCI        |
| GSE40272 | X29287       | 391532    | LOC391532    |
| GSE40272 | X40443       | 6389      | SDHA         |
| GSE40272 | X31594       | 9698      | PUM1         |
| GSE40272 | X9830        | 2503      | FTH1P11      |
| GSE40272 | X37282       | 150472    | CBWD2        |
| GSE40272 | X38798       | 51100     | SH3GLB1      |
| GSE40272 | X37728       | 79665     | DHX40        |
| GSE70768 | ILMN_1739161 | 8611      | PPAP2A       |
| GSE70768 | ILMN_1720114 | 51053     | GMNN         |
| GSE70768 | ILMN_1663575 | 256227    | MGC87042     |
| GSE70768 | ILMN_1661593 | 51030     | FAM18B       |
| GSE70768 | ILMN_1733094 | 26872     | STEAP1       |
| GSE70768 | ILMN_1677607 | 6309      | SC5DL        |
| GSE70768 | ILMN_1659415 | 8649      | MAP2K1IP1    |
| GSE70768 | ILMN_1708416 | 23204     | ARL6IP1      |
| GSE70768 | ILMN_1757074 | 2790      | GNG10        |
| GSE70768 | ILMN_1724139 | 114908    | TMEM123      |
| GSE70768 | ILMN_3239610 | 100133565 | LOC100133565 |
| GSE70768 | ILMN_1768050 | 60592     | SCOC         |
| GSE70768 | ILMN_2340565 | 27032     | ATP2C1       |
| GSE70768 | ILMN_1702177 | 2739      | GLO1         |
| GSE70768 | ILMN_1736888 | 51128     | SAR1B        |
| GSE70768 | ILMN_1661895 | 51050     | PI15         |
| GSE70768 | ILMN_1708627 | 653226    | LOC653226    |
| GSE70768 | ILMN_2228873 | 83930     | STARD3NL     |
| GSE70768 | ILMN_1810759 | 27249     | C2orf25      |
| GSE70768 | ILMN_2094905 | 51397     | COMMD10      |
| GSE70768 | ILMN_1703337 | 441763    | LOC441763    |
| GSE70768 | ILMN_1745076 | 9685      | CLINT1       |
| GSE70768 | ILMN_2333594 | 6613      | SUMO2        |
| GSE70768 | ILMN_2343278 | 8611      | PPAP2A       |
| GSE70768 | ILMN_2333367 | 2280      | FKBP1A       |
| GSE70768 | ILMN_2334760 | 51566     | ARMCX3       |
| GSE70768 | ILMN_1772743 | 10026     | PIGK         |
| GSE70768 | ILMN_2225318 | 6611      | SMS          |
| GSE70768 | ILMN_2094166 | 51510     | CHMP5        |
| GSE70768 | ILMN_1741176 | 25978     | CHMP2B       |
| GSE70768 | ILMN_2041293 | 6713      | SQLE         |
| GSE70768 | ILMN_1792689 | 8334      | HIST1H2AC    |
| GSE70768 | ILMN_1723884 | 378       | ARF4         |
| GSE70768 | ILMN_2307740 | 4179      | CD46         |
| GSE70768 | ILMN_1790315 | 79846     | C7orf63      |
| GSE70768 | ILMN_1764168 | 6814      | STXBP3       |
| GSE70768 | ILMN_1682316 | 51592     | TRIM33       |
| GSE70768 | ILMN_1798657 | 79718     | TBL1XR1      |
| GSE70768 | ILMN_1691097 | 3320      | HSP90AA1     |
| GSE70768 | ILMN_1784753 | 51247     | PAIP2        |
| GSE70768 | ILMN_1793474 | 3638      | INSIG1       |

# Supplementary\_table\_S2

|          |              |        |           |
|----------|--------------|--------|-----------|
| GSE70768 | ILMN_3200921 | 642590 | LOC642590 |
| GSE70768 | ILMN_2279635 | 1982   | EIF4G2    |
| GSE70768 | ILMN_1731640 | 286527 | MGC39900  |
| GSE70768 | ILMN_1694305 | 6611   | SMS       |
| GSE70768 | ILMN_1680781 | 64430  | C14orf135 |
| GSE70768 | ILMN_1685636 | 3781   | KCNN2     |
| GSE70768 | ILMN_1770653 | 114569 | MAL2      |
| GSE70768 | ILMN_1724376 | 27248  | C2orf30   |
| GSE70768 | ILMN_1696432 | 3417   | IDH1      |
| GSE70768 | ILMN_1857915 | 401397 | LOC401397 |
| GSE70768 | ILMN_1674522 | 25994  | HIGD1A    |
| GSE70768 | ILMN_1734895 | 113402 | SFT2D1    |
| GSE70768 | ILMN_1699476 | 6120   | RPE       |
| GSE70768 | ILMN_3198367 | 646347 | LOC646347 |
| GSE70768 | ILMN_1720422 | 9908   | G3BP2     |
| GSE70768 | ILMN_1785191 | 28978  | TMEM14A   |
| GSE70768 | ILMN_1782609 | 10735  | STAG2     |
| GSE70768 | ILMN_2357272 | 9774   | BCLAF1    |
| GSE70768 | ILMN_2395974 | 10935  | PRDX3     |
| GSE70768 | ILMN_2352077 | 9365   | KL        |
| GSE70768 | ILMN_2381753 | 9908   | G3BP2     |
| GSE70768 | ILMN_1692177 | 8848   | TSC22D1   |
| GSE70768 | ILMN_1653871 | 10135  | NAMPT     |
| GSE70768 | ILMN_2180885 | 80157  | FLJ21511  |
| GSE70768 | ILMN_1672405 | 51014  | TMED7     |
| GSE70768 | ILMN_2383435 | 5716   | PSMD10    |
| GSE70768 | ILMN_2394296 | 51128  | SAR1B     |
| GSE70768 | ILMN_1677396 | 54602  | NDFIP2    |
| GSE70768 | ILMN_1786532 | 10175  | CNIH      |
| GSE70768 | ILMN_1787567 | 8848   | TSC22D1   |
| GSE70768 | ILMN_2360705 | 2181   | ACSL3     |
| GSE70768 | ILMN_1772946 | 29966  | STRN3     |
| GSE70768 | ILMN_2353033 | 8939   | FUBP3     |
| GSE70768 | ILMN_1701681 | 90701  | SEC11C    |
| GSE70768 | ILMN_2395969 | 10935  | PRDX3     |
| GSE70768 | ILMN_3177285 | 10236  | HNRNPR    |
| GSE70768 | ILMN_1751234 | 29071  | C1GALT1C1 |
| GSE70768 | ILMN_2368971 | 5718   | PSMD12    |
| GSE70768 | ILMN_1781761 | 22875  | ENPP4     |
| GSE70768 | ILMN_2224444 | 83891  | SNX25     |
| GSE70768 | ILMN_2090558 | 27249  | C2orf25   |
| GSE70768 | ILMN_2410742 | 221037 | JMJD1C    |
| GSE70768 | ILMN_1807994 | 57092  | PCNP      |
| GSE70768 | ILMN_1763265 | 57132  | CHMP1B    |
| GSE70768 | ILMN_2105308 | 8813   | DPM1      |
| GSE70768 | ILMN_1706817 | 27230  | SERP1     |
| GSE70768 | ILMN_2111918 | 64430  | C14orf135 |
| GSE70768 | ILMN_1776102 | 5716   | PSMD10    |
| GSE70768 | ILMN_1787657 | 9069   | CLDN12    |
| GSE70768 | ILMN_1732534 | 51510  | CHMP5     |
| GSE70768 | ILMN_2119945 | 4709   | NDUFB3    |
| GSE70768 | ILMN_1711766 | 6500   | SKP1A     |
| GSE70768 | ILMN_1744647 | 55832  | CAND1     |

# Supplementary\_table\_S2

|          |              |           |              |
|----------|--------------|-----------|--------------|
| GSE70768 | ILMN_3251440 | 5286      | PIK3C2A      |
| GSE70768 | ILMN_1800220 | 51133     | KCTD3        |
| GSE70768 | ILMN_1708130 | 26298     | EHF          |
| GSE70768 | ILMN_1773117 | 54880     | BCOR         |
| GSE70768 | ILMN_1699112 | 1315      | COPB1        |
| GSE70768 | ILMN_2325574 | 113201    | CASC4        |
| GSE70768 | ILMN_1722522 | 905       | CCNT2        |
| GSE70768 | ILMN_3249578 | 100132394 | LOC100132394 |
| GSE70768 | ILMN_2099594 | 6726      | SRP9         |
| GSE70768 | ILMN_1761721 | 55737     | VPS35        |
| GSE70768 | ILMN_2131880 | 84661     | DPY30        |
| GSE70768 | ILMN_1741477 | 4089      | SMAD4        |
| GSE70768 | ILMN_1757287 | 5597      | MAPK6        |
| GSE70768 | ILMN_1735347 | 84693     | MCEE         |
| GSE70768 | ILMN_3243011 | 641844    | LOC641844    |
| GSE70768 | ILMN_1670821 | 246126    | CYorf15A     |
| GSE70768 | ILMN_2225608 | 57579     | FAM135A      |
| GSE70768 | ILMN_2413259 | 122809    | SOCS4        |
| GSE70768 | ILMN_2174369 | 60481     | ELOVL5       |
| GSE70768 | ILMN_1662129 | 5955      | RCN2         |
| GSE70768 | ILMN_1763404 | 653226    | LOC653226    |
| GSE70768 | ILMN_1659786 | 54482     | CCDC76       |
| GSE70768 | ILMN_1681249 | 55605     | KIF21A       |
| GSE70768 | ILMN_1690690 | 11196     | SEC23IP      |
| GSE70768 | ILMN_1751956 | 4259      | MGST3        |
| GSE70768 | ILMN_1776005 | 58505     | OSTC         |
| GSE70768 | ILMN_1748926 | 84928     | TMEM209      |
| GSE70768 | ILMN_1717337 | 64844     | 7-Mar        |
| GSE70768 | ILMN_2344298 | 261729    | STEAP2       |
| GSE70768 | ILMN_1734833 | 4683      | NBN          |
| GSE70768 | ILMN_1676296 | 8611      | PPAP2A       |
| GSE70768 | ILMN_1751120 | 8365      | HIST1H4H     |
| GSE70768 | ILMN_1784333 | 9728      | SECISBP2L    |
| GSE70768 | ILMN_1713143 | 11222     | MRPL3        |
| GSE70768 | ILMN_1656682 | 51582     | AZIN1        |
| GSE70768 | ILMN_1672366 | 84992     | PIGY         |
| GSE70768 | ILMN_1720996 | 6558      | SLC12A2      |
| GSE70768 | ILMN_1661799 | 25994     | HIGD1A       |
| GSE70768 | ILMN_1669881 | 27075     | TSPAN13      |
| GSE70768 | ILMN_2234758 | 6727      | SRP14        |
| GSE70768 | ILMN_1814770 | 131034    | CPNE4        |
| GSE70768 | ILMN_1738736 | 8723      | SNX4         |
| GSE70768 | ILMN_1705629 | 26872     | STEAP1       |
| GSE70768 | ILMN_1743299 | 5828      | PXMP3        |
| GSE70768 | ILMN_1655316 | 5706      | PSMC6        |
| GSE70768 | ILMN_2388466 | 7072      | TIA1         |
| GSE70768 | ILMN_1711516 | 523       | ATP6V1A      |
| GSE70768 | ILMN_2162328 | 5805      | PTS          |
| GSE70768 | ILMN_1759983 | 1810      | DR1          |
| GSE70768 | ILMN_1709043 | 55848     | C9orf46      |
| GSE70768 | ILMN_1751708 | 9445      | ITM2B        |
| GSE70768 | ILMN_2330267 | 6059      | ABCE1        |
| GSE70768 | ILMN_1763147 | 4712      | NDUFB6       |

# Supplementary\_table\_S2

|          |              |           |              |
|----------|--------------|-----------|--------------|
| GSE70768 | ILMN_2408645 | 653566    | LOC653566    |
| GSE70768 | ILMN_3256004 | 100130003 | LOC100130003 |
| GSE70768 | ILMN_1785071 | 6414      | SEPP1        |
| GSE70768 | ILMN_1781952 | 4257      | MGST1        |
| GSE70768 | ILMN_2176955 | 8065      | CUL5         |
| GSE70768 | ILMN_2306565 | 10651     | MTX2         |
| GSE70768 | ILMN_1683562 | 6637      | SNRPG        |
| GSE70768 | ILMN_1710326 | 56650     | CLDND1       |
| GSE70768 | ILMN_1738632 | 5573      | PRKAR1A      |
| GSE70768 | ILMN_1672006 | 6741      | SSB          |
| GSE70768 | ILMN_1766024 | 11235     | PDCD10       |
| GSE70768 | ILMN_3244248 | 645203    | TMEM14D      |
| GSE70768 | ILMN_1801928 | 7534      | YWHAZ        |
| GSE70768 | ILMN_1651496 | 3017      | HIST1H2BD    |
| GSE70768 | ILMN_1660890 | 33        | ACADL        |
| GSE70768 | ILMN_1691570 | 29081     | METTTL5      |
| GSE70768 | ILMN_1772929 | 522       | ATP5J        |
| GSE70768 | ILMN_1735461 | 9188      | DDX21        |
| GSE70768 | ILMN_2367020 | 23480     | SEC61G       |
| GSE70768 | ILMN_1673820 | 6596      | HLTF         |
| GSE70768 | ILMN_2083469 | 8660      | IRS2         |
| GSE70768 | ILMN_2352563 | 56650     | CLDND1       |
| GSE70768 | ILMN_1727813 | 25874     | BRP44        |
| GSE70768 | ILMN_1748291 | 163859    | C1orf55      |
| GSE70768 | ILMN_2134110 | 58515     | SELK         |
| GSE70768 | ILMN_1731612 | 51377     | UCHL5        |
| GSE70768 | ILMN_1761981 | 84191     | FAM96A       |
| GSE70768 | ILMN_1701696 | 644863    | LOC644863    |
| GSE70768 | ILMN_1739497 | 404672    | GTF2H5       |
| GSE70768 | ILMN_2194448 | 201595    | STT3B        |
| GSE70768 | ILMN_1806634 | 23530     | NNT          |
| GSE70768 | ILMN_3237850 | 285636    | C5orf51      |
| GSE70768 | ILMN_1770378 | 10393     | ANAPC10      |
| GSE70768 | ILMN_1659753 | 3920      | LAMP2        |
| GSE70768 | ILMN_1814573 | 55783     | FTSJD1       |
| GSE70768 | ILMN_1700915 | 648       | BMI1         |
| GSE70768 | ILMN_2340259 | 5142      | PDE4B        |
| GSE70768 | ILMN_3243945 | 440145    | C13orf37     |
| GSE70768 | ILMN_1666156 | 9643      | MORF4L2      |
| GSE70768 | ILMN_1776297 | 2803      | GOLGA4       |
| GSE70768 | ILMN_1729175 | 26273     | FBXO3        |
| GSE70768 | ILMN_2151056 | 119032    | C10orf32     |
| GSE70768 | ILMN_1732071 | 8349      | HIST2H2BE    |
| GSE70768 | ILMN_1766851 | 55863     | TMEM126B     |
| GSE70768 | ILMN_1698001 | 4690      | NCK1         |
| GSE70768 | ILMN_1732398 | 4246      | SCGB2A1      |
| GSE70768 | ILMN_2220184 | 2673      | GFPT1        |
| GSE70768 | ILMN_2330112 | 10175     | CNIH         |
| GSE70768 | ILMN_2217809 | 84233     | TMEM126A     |
| GSE70768 | ILMN_1737462 | 55074     | OXR1         |
| GSE70768 | ILMN_1761519 | 1982      | EIF4G2       |
| GSE70768 | ILMN_1749297 | 86        | ACTL6A       |
| GSE70768 | ILMN_1767837 | 51026     | GOLT1B       |

# Supplementary\_table\_S2

|          |              |                        |
|----------|--------------|------------------------|
| GSE70768 | ILMN_1679727 | 1195 CLK1              |
| GSE70768 | ILMN_3246409 | 3187 HNRNPH1           |
| GSE70768 | ILMN_2169439 | 3685 ITGAV             |
| GSE70768 | ILMN_3251545 | 51510 CHMP5            |
| GSE70768 | ILMN_1690524 | 6845 VAMP7             |
| GSE70768 | ILMN_1671158 | 28998 MRPL13           |
| GSE70768 | ILMN_2378048 | 3190 HNRPK             |
| GSE70768 | ILMN_2324157 | 9039 UBA3              |
| GSE70768 | ILMN_1788462 | 262 AMD1               |
| GSE70768 | ILMN_1777663 | 7155 TOP2B             |
| GSE70768 | ILMN_2348093 | 522 ATP5J              |
| GSE70768 | ILMN_1652024 | 1456 CSNK1G3           |
| GSE70768 | ILMN_1756928 | 6252 RTN1              |
| GSE70768 | ILMN_2381758 | 9908 G3BP2             |
| GSE70768 | ILMN_2369924 | 4712 NDUFB6            |
| GSE70768 | ILMN_1684042 | 10282 BET1             |
| GSE70768 | ILMN_1698487 | 6392 SDHD              |
| GSE70768 | ILMN_3236481 | 100129086 LOC100129086 |
| GSE70768 | ILMN_1733356 | 25843 PREI3            |
| GSE70768 | ILMN_1780382 | 653566 LOC653566       |
| GSE70768 | ILMN_1722811 | 1027 CDKN1B            |
| GSE70768 | ILMN_1750394 | 25800 SLC39A6          |
| GSE70768 | ILMN_1798705 | 892 CCNC               |
| GSE70768 | ILMN_1764087 | 6856 SYPL1             |
| GSE70768 | ILMN_1807455 | 51635 DHRS7            |
| GSE70768 | ILMN_2090123 | 54505 DHX29            |
| GSE70768 | ILMN_2313851 | 114883 OSBPL9          |
| GSE70768 | ILMN_1758543 | 10175 CNIH             |
| GSE70768 | ILMN_1760338 | 643357 LOC643357       |
| GSE70768 | ILMN_1673282 | 3920 LAMP2             |
| GSE70768 | ILMN_3229859 | 25843 MOBKL3           |
| GSE70768 | ILMN_2351611 | 29979 UBQLN1           |
| GSE70768 | ILMN_1672124 | 51313 C4orf18          |
| GSE70768 | ILMN_1719032 | 27258 LSM3             |
| GSE70768 | ILMN_1805344 | 1655 DDX5              |
| GSE70768 | ILMN_1773576 | 8895 CPNE3             |
| GSE70768 | ILMN_1760087 | 1811 SLC26A3           |
| GSE70768 | ILMN_2390338 | 10477 UBE2E3           |
| GSE70768 | ILMN_1765409 | 8027 STAM              |
| GSE70768 | ILMN_1772278 | 85461 TANC1            |
| GSE70768 | ILMN_1807397 | 4711 NDUFB5            |
| GSE70768 | ILMN_2290618 | 9117 SEC22C            |
| GSE70768 | ILMN_2377174 | 6856 SYPL1             |
| GSE70768 | ILMN_1792508 | 9528 TMEM59            |
| GSE70768 | ILMN_1800602 | 25801 GCA              |
| GSE70768 | ILMN_1654939 | 10959 TMED2            |
| GSE70768 | ILMN_2076940 | 64769 C1orf149         |
| GSE70768 | ILMN_1756417 | 353322 ANKRD37         |
| GSE70768 | ILMN_1809101 | 261729 STEAP2          |
| GSE70768 | ILMN_1737283 | 286527 MGC39900        |
| GSE70768 | ILMN_1756999 | 5934 RBL2              |
| GSE70768 | ILMN_1742887 | 645058 LOC645058       |
| GSE70768 | ILMN_1764970 | 221037 JMJD1C          |

# Supplementary\_table\_S2

|          |              |        |           |
|----------|--------------|--------|-----------|
| GSE70768 | ILMN_1712748 | 51527  | C14orf129 |
| GSE70768 | ILMN_3193306 | 26175  | C14orf109 |
| GSE70768 | ILMN_1783684 | 648695 | LOC648695 |
| GSE70768 | ILMN_1667430 | 8560   | DEGS1     |
| GSE70768 | ILMN_1732489 | 84068  | SLC10A7   |
| GSE70768 | ILMN_2402416 | 10049  | DNAJB6    |
| GSE70768 | ILMN_1807710 | 3094   | HINT1     |
| GSE70768 | ILMN_1777261 | 10447  | FAM3C     |
| GSE70768 | ILMN_1731194 | 11171  | STRAP     |
| GSE70768 | ILMN_2175131 | 51522  | TMEM14C   |
| GSE70768 | ILMN_1755303 | 7764   | ZNF217    |
| GSE70768 | ILMN_1753719 | 2958   | GTF2A2    |
| GSE70768 | ILMN_1751492 | 51030  | FAM18B    |
| GSE70768 | ILMN_1717765 | 55190  | NUDT11    |
| GSE70768 | ILMN_1672191 | 515    | ATP5F1    |
| GSE70768 | ILMN_1813491 | 10558  | SPTLC1    |
| GSE70768 | ILMN_2142117 | 127018 | LYPLAL1   |
| GSE70768 | ILMN_1798588 | 6596   | HLTF      |
| GSE70768 | ILMN_1695423 | 928    | CD9       |
| GSE70768 | ILMN_1667994 | 262    | AMD1      |
| GSE70768 | ILMN_2354140 | 51126  | NAT5      |
| GSE70768 | ILMN_2351309 | 7073   | TIAL1     |
| GSE70768 | ILMN_1769319 | 7555   | CNBP      |
| GSE70768 | ILMN_3187771 | 55449  | C14orf167 |
| GSE70768 | ILMN_1708502 | 27125  | AFF4      |
| GSE70768 | ILMN_1666096 | 2181   | ACSL3     |
| GSE70768 | ILMN_1657857 | 51522  | TMEM14C   |
| GSE70768 | ILMN_1787026 | 23480  | SEC61G    |
| GSE70768 | ILMN_2062112 | 55854  | ZC3H15    |
| GSE70768 | ILMN_1754600 | 54874  | FBNP1L    |
| GSE70768 | ILMN_1696568 | 27032  | ATP2C1    |
| GSE70768 | ILMN_2220518 | 10542  | HBXIP     |
| GSE70768 | ILMN_2224486 | 57415  | C3orf14   |
| GSE70768 | ILMN_1791483 | 5144   | PDE4D     |
| GSE70768 | ILMN_1711878 | 58478  | ENOPH1    |
| GSE70768 | ILMN_1730433 | 23607  | CD2AP     |
| GSE70768 | ILMN_1677824 | 5867   | RAB4A     |
| GSE70768 | ILMN_1652128 | 55788  | LMBRD1    |
| GSE70768 | ILMN_2368773 | 10447  | FAM3C     |
| GSE70768 | ILMN_1664466 | 55958  | KLHL9     |
| GSE70768 | ILMN_1656129 | 57181  | SLC39A10  |
| GSE70768 | ILMN_1766981 | 25972  | UNC50     |
| GSE70768 | ILMN_2375879 | 7422   | VEGFA     |
| GSE70768 | ILMN_1656913 | 4190   | MDH1      |
| GSE70768 | ILMN_3290211 | 644761 | LOC644761 |
| GSE70768 | ILMN_1803775 | 3336   | HSPE1     |
| GSE70768 | ILMN_1669633 | 52     | ACP1      |
| GSE70768 | ILMN_2072140 | 91408  | BTF3L4    |
| GSE70768 | ILMN_1706094 | 25831  | HECTD1    |
| GSE70768 | ILMN_2184184 | 301    | ANXA1     |
| GSE70768 | ILMN_1655422 | 6139   | RPL17     |
| GSE70768 | ILMN_1703697 | 10314  | LANCL1    |
| GSE70768 | ILMN_1815051 | 8539   | API5      |

# Supplementary\_table\_S2

|          |              |                        |
|----------|--------------|------------------------|
| GSE70768 | ILMN_2409395 | 892 CCNC               |
| GSE70768 | ILMN_3260070 | 100128266 LOC100128266 |
| GSE70768 | ILMN_3272603 | 58516 FAM60A           |
| GSE70768 | ILMN_1657949 | 6009 RHEB              |
| GSE70768 | ILMN_2052598 | 83787 ARMC10           |
| GSE70768 | ILMN_1716071 | 152559 PAQR3           |
| GSE70768 | ILMN_2091347 | 3417 IDH1              |
| GSE70768 | ILMN_1812478 | 9326 ZNHIT3            |
| GSE70768 | ILMN_1803279 | 50999 TMED5            |
| GSE70768 | ILMN_1703791 | 310 ANXA7              |
| GSE70768 | ILMN_1750373 | 3730 KAL1              |
| GSE70768 | ILMN_1792587 | 9525 VPS4B             |
| GSE70768 | ILMN_1756525 | 27252 KLHL20           |
| GSE70768 | ILMN_1673543 | 55276 PGM2             |
| GSE70768 | ILMN_1704369 | 51474 LIMA1            |
| GSE70768 | ILMN_2362245 | 3188 HNRNPH2           |
| GSE70768 | ILMN_3244607 | 150864 FAM117B         |
| GSE70768 | ILMN_1773935 | 55858 TMEM165          |
| GSE70768 | ILMN_1801767 | 171586 ABHD3           |
| GSE70768 | ILMN_1798886 | 11051 NUDT21           |
| GSE70768 | ILMN_1665049 | 80208 SPG11            |
| GSE70768 | ILMN_1655329 | 55781 RIOK2            |
| GSE70768 | ILMN_1693259 | 10015 PDCD6IP          |
| GSE70768 | ILMN_1695386 | 5889 RAD51C            |
| GSE70768 | ILMN_1749009 | 25996 REXO2            |
| GSE70768 | ILMN_2045729 | 55759 WDR12            |
| GSE70768 | ILMN_2378100 | 26234 FBXL5            |
| GSE70768 | ILMN_1775573 | 286148 DPY19L4         |
| GSE70768 | ILMN_1703720 | 51639 SF3B14           |
| GSE70768 | ILMN_1658992 | 8813 DPM1              |
| GSE70768 | ILMN_1719518 | 378 ARF4               |
| GSE70768 | ILMN_1748591 | 4953 ODC1              |
| GSE70768 | ILMN_1727361 | 23592 LEMD3            |
| GSE70768 | ILMN_1796458 | 11345 GABARAPL2        |
| GSE70768 | ILMN_1725105 | 9521 EEF1E1            |
| GSE70768 | ILMN_1744023 | 145815 MGC18216        |
| GSE70768 | ILMN_1759453 | 7381 UQCRB             |
| GSE70768 | ILMN_2125374 | 55907 CMAS             |
| GSE70768 | ILMN_1678922 | 26091 HERC4            |
| GSE70768 | ILMN_1775448 | 5217 PFN2              |
| GSE70768 | ILMN_1679796 | 9804 TOMM20            |
| GSE70768 | ILMN_1730888 | 340252 ZNF680          |
| GSE70768 | ILMN_1682935 | 127018 LYPLAL1         |
| GSE70768 | ILMN_3247578 | 2195 FAT1              |
| GSE70768 | ILMN_1758623 | 3017 HIST1H2BD         |
| GSE70768 | ILMN_1708841 | 64083 GOLPH3           |
| GSE70768 | ILMN_1783333 | 56942 C16orf61         |
| GSE70768 | ILMN_1665280 | 28972 SPCS1            |
| GSE70768 | ILMN_2330861 | 10051 SMC4             |
| GSE70768 | ILMN_2143566 | 25800 SLC39A6          |
| GSE70768 | ILMN_1742230 | 11177 BAZ1A            |
| GSE70768 | ILMN_1726239 | 6902 TBCA              |
| GSE70768 | ILMN_1678766 | 6993 DYNLT1            |

# Supplementary\_table\_S2

|          |              |        |                  |
|----------|--------------|--------|------------------|
| GSE70768 | ILMN_2206554 | 80255  | SLC35F5          |
| GSE70768 | ILMN_1761456 | 79868  | ALG13            |
| GSE70768 | ILMN_1666384 | 151579 | LOC151579        |
| GSE70768 | ILMN_2191929 | 54942  | C9orf6           |
| GSE70768 | ILMN_2307455 | 7319   | UBE2A            |
| GSE70768 | ILMN_1788160 | 3799   | KIF5B            |
| GSE70768 | ILMN_1677440 | 10159  | ATP6AP2          |
| GSE70768 | ILMN_1746494 | 2339   | FNTA             |
| GSE70768 | ILMN_1670970 | 5530   | PPP3CA           |
| GSE70768 | ILMN_1807633 | 10247  | HRSP12           |
| GSE70768 | ILMN_1730611 | 57142  | RTN4             |
| GSE70768 | ILMN_1665887 | 80349  | WDR61            |
| GSE70768 | ILMN_1797082 | 23161  | SNX13            |
| GSE70768 | ILMN_1753342 | 6303   | SAT1             |
| GSE70768 | ILMN_2187487 | 54497  | HEATR5B          |
| GSE70768 | ILMN_2108339 | 55623  | THUMPD1          |
| GSE70768 | ILMN_1741976 | 56916  | SMARCAD1         |
| GSE70768 | ILMN_2168314 | 5238   | PGM3             |
| GSE70768 | ILMN_1713901 | 11015  | KDEL3            |
| GSE70768 | ILMN_3239621 | 11017  | SNRNP27          |
| GSE70768 | ILMN_1754839 | 1665   | DHX15            |
| GSE70768 | ILMN_2166865 | 56943  | ENY2             |
| GSE70768 | ILMN_1790909 | 4780   | NFE2L2           |
| GSE70768 | ILMN_2407082 | 9403   | Selenoprotein 15 |
| GSE70768 | ILMN_1765060 | 55030  | FBXO34           |
| GSE70768 | ILMN_1696494 | 54918  | CMTM6            |
| GSE70768 | ILMN_1681340 | 51668  | C1orf41          |
| GSE70768 | ILMN_2328776 | 51765  | MST4             |
| GSE70768 | ILMN_1723212 | 6428   | SFRS3            |
| GSE70768 | ILMN_2312275 | 6729   | SRP54            |
| GSE70768 | ILMN_1693668 | 23063  | KIAA0261         |
| GSE70768 | ILMN_1738346 | 221154 | EFHA1            |
| GSE70768 | ILMN_1736054 | 10923  | SUB1             |
| GSE70768 | ILMN_1662846 | 26996  | GPR160           |
| GSE70768 | ILMN_3251560 | 153339 | TMEM167A         |
| GSE70768 | ILMN_2343010 | 388962 | BOLA3            |
| GSE70768 | ILMN_1798346 | 57614  | KIAA1468         |
| GSE70769 | ILMN_1760849 | 81831  | NETO2            |
| GSE70769 | ILMN_1763641 | 80110  | ZNF614           |
| GSE70769 | ILMN_1808590 | 2982   | GUCY1A3          |
| GSE70769 | ILMN_1729142 | 201161 | CENPV            |
| GSE70769 | ILMN_1714737 | 25842  | ASF1A            |
| GSE70769 | ILMN_1724139 | 114908 | TMEM123          |
| GSE70769 | ILMN_1715886 | 29883  | CNOT7            |
| GSE70769 | ILMN_2409395 | 892    | CCNC             |
| GSE70769 | ILMN_1703408 | 7976   | FZD3             |
| GSE70769 | ILMN_3246608 | 201161 | CENPV            |
| GSE70769 | ILMN_1662846 | 26996  | GPR160           |
| GSE70769 | ILMN_1784946 | 23595  | ORC3L            |
| GSE70769 | ILMN_1662049 | 55326  | AGPAT5           |
| GSE70769 | ILMN_1670172 | 55339  | WDR33            |
| GSE70769 | ILMN_1656134 | 29883  | CNOT7            |
| GSE70769 | ILMN_1654441 | 4942   | OAT              |



# Supplementary\_table\_S2

|          |              |        |           |
|----------|--------------|--------|-----------|
| GSE70769 | ILMN_1811330 | 54463  | FAM134B   |
| GSE70769 | ILMN_1774823 | 6164   | RPL34     |
| GSE70769 | ILMN_1736054 | 10923  | SUB1      |
| GSE70769 | ILMN_1744647 | 55832  | CAND1     |
| GSE70769 | ILMN_1675542 | 729148 | LOC729148 |
| GSE70769 | ILMN_3272603 | 58516  | FAM60A    |
| GSE70769 | ILMN_1810176 | 6885   | MAP3K7    |
| GSE70769 | ILMN_1758214 | 57038  | RARS2     |
| GSE70769 | ILMN_2325347 | 8706   | B3GALNT1  |
| GSE70769 | ILMN_2090558 | 27249  | C2orf25   |
| GSE70769 | ILMN_1781097 | 23190  | UBXN4     |
| GSE70769 | ILMN_2352563 | 56650  | CLDND1    |
| GSE70769 | ILMN_1712748 | 51527  | C14orf129 |
| GSE70769 | ILMN_3188984 | 441951 | C20orf199 |
| GSE70769 | ILMN_1777564 | 4085   | MAD2L1    |
| GSE70769 | ILMN_1757384 | 5901   | RAN       |
| GSE70769 | ILMN_1736510 | 3344   | FOXN2     |
| GSE70769 | ILMN_2255310 | 6210   | RPS15A    |
| GSE70769 | ILMN_1676423 | 892    | CCNC      |
| GSE70769 | ILMN_1767747 | 3066   | HDAC2     |
| GSE70769 | ILMN_3229859 | 25843  | MOBKL3    |
| GSE70769 | ILMN_1722156 | 112611 | RWDD2A    |
| GSE70769 | ILMN_1710326 | 56650  | CLDND1    |
| GSE70769 | ILMN_1697024 | 730432 | LOC730432 |
| GSE70769 | ILMN_1812776 | 23219  | FBXO28    |
| GSE70769 | ILMN_1707551 | 125061 | AFMID     |
| GSE70769 | ILMN_1723212 | 6428   | SFRS3     |
| GSE70769 | ILMN_1703132 | 57226  | LYRM2     |
| GSE70769 | ILMN_1669881 | 27075  | TSPAN13   |
| GSE70769 | ILMN_1800573 | 6227   | RPS21     |
| GSE70769 | ILMN_1774028 | 9650   | MTFR1     |
| GSE70769 | ILMN_1810759 | 27249  | C2orf25   |
| GSE70769 | ILMN_2045911 | 23219  | FBXO28    |
| GSE70769 | ILMN_1676448 | 57590  | WDFY1     |
| GSE70769 | ILMN_1652024 | 1456   | CSNK1G3   |
| GSE70769 | ILMN_2283597 | 54463  | FAM134B   |
| GSE70769 | ILMN_3307930 | 5901   | RAN       |
| GSE70769 | ILMN_1678766 | 6993   | DYNLT1    |
| GSE70769 | ILMN_1657470 | 253943 | YTHDF3    |
| GSE70769 | ILMN_2361570 | 57231  | SNX14     |
| GSE70769 | ILMN_1729033 | 6133   | RPL9      |
| GSE70769 | ILMN_2206554 | 80255  | SLC35F5   |
| GSE70769 | ILMN_2380566 | 6477   | SIAH1     |
| GSE70769 | ILMN_1726421 | 51108  | METTTL9   |
| GSE70769 | ILMN_1810719 | 54165  | DCUN1D1   |
| GSE70769 | ILMN_2224031 | 1070   | CETN3     |
| GSE70769 | ILMN_2330267 | 6059   | ABCE1     |
| GSE70769 | ILMN_1722522 | 905    | CCNT2     |
| GSE70769 | ILMN_1759359 | 91408  | BTF3L4    |
| GSE70769 | ILMN_2197519 | 199692 | ZNF627    |
| GSE70769 | ILMN_3306168 | 25843  | MOBKL3    |
| GSE70769 | ILMN_1670420 | 10988  | METAP2    |
| GSE70769 | ILMN_1676846 | 6059   | ABCE1     |

# Supplementary\_table\_S2

|          |              |           |              |
|----------|--------------|-----------|--------------|
| GSE70769 | ILMN_1727618 | 137682    | C8orf38      |
| GSE70769 | ILMN_1703330 | 56929     | FEM1C        |
| GSE70769 | ILMN_1680673 | 221294    | NT5DC1       |
| GSE70769 | ILMN_3280847 | 651697    | LOC651697    |
| GSE70769 | ILMN_1768050 | 60592     | SCOC         |
| GSE70769 | ILMN_1677404 | 5911      | RAP2A        |
| GSE70769 | ILMN_1796119 | 221302    | ZUFSP        |
| GSE70769 | ILMN_1752631 | 8545      | CGGBP1       |
| GSE70769 | ILMN_3237679 | 375743    | PTAR1        |
| GSE70769 | ILMN_3251451 | 51003     | MED31        |
| GSE70769 | ILMN_2148847 | 55122     | AKIRIN2      |
| GSE70769 | ILMN_3260070 | 100128266 | LOC100128266 |
| GSE70769 | ILMN_1759983 | 1810      | DR1          |

Supplementary\_table\_S2

| log2 Fold Regulation | raw p value | pFDR        |
|----------------------|-------------|-------------|
| 0,655081364          | 1,39E-06    | 7,10E-04    |
| 0,584318901          | 3,99E-07    | 3,12E-04    |
| 0,579356564          | 3,03E-04    | 0,017754718 |
| 0,57544362           | 1,03E-44    | 6,33E-41    |
| 0,547970214          | 3,22E-04    | 0,01850288  |
| 0,546921971          | 3,78E-07    | 3,12E-04    |
| 0,545838652          | 7,92E-05    | 0,008446266 |
| 0,53083549           | 2,74E-05    | 0,004310263 |
| 0,502608246          | 6,70E-04    | 0,025419647 |
| 0,472393767          | 2,50E-04    | 0,016404092 |
| 0,466812144          | 4,02E-04    | 0,020074913 |
| 0,464885861          | 1,68E-05    | 0,003556422 |
| 0,462411017          | 4,76E-04    | 0,021996983 |
| 0,459707895          | 3,96E-04    | 0,019953431 |
| 0,456861595          | 5,69E-04    | 0,023754937 |
| 0,454960037          | 3,86E-04    | 0,019743686 |
| 0,454309125          | 5,62E-04    | 0,023754937 |
| 0,4442706            | 1,19E-04    | 0,010414504 |
| 0,429672819          | 2,41E-04    | 0,016141477 |
| 0,426477488          | 5,01E-05    | 0,006837753 |
| 0,426219309          | 4,15E-04    | 0,020260029 |
| 0,42369559           | 5,24E-05    | 0,006996009 |
| 0,42057271           | 6,13E-04    | 0,02457455  |
| 0,413129205          | 3,68E-04    | 0,019484281 |
| 0,397893163          | 4,97E-04    | 0,02252774  |
| 0,389550342          | 3,01E-04    | 0,017754718 |
| 0,385410845          | 1,75E-04    | 0,013625307 |
| 0,379634294          | 2,11E-04    | 0,015539329 |
| 0,374610431          | 2,78E-04    | 0,017124331 |
| 0,374198723          | 5,75E-07    | 3,93E-04    |
| 0,371650854          | 0,00177202  | 0,045872284 |
| 0,371384624          | 6,24E-05    | 0,007669316 |
| 0,369491691          | 7,94E-06    | 0,0021285   |
| 0,367950664          | 1,70E-04    | 0,013572549 |
| 0,365651774          | 0,001547933 | 0,043229542 |
| 0,362919901          | 5,50E-06    | 0,001989516 |
| 0,361470301          | 0,001209035 | 0,036773826 |
| 0,353278132          | 8,06E-04    | 0,028120878 |
| 0,34971767           | 6,43E-06    | 0,002080867 |
| 0,347193376          | 2,23E-05    | 0,003906778 |
| 0,346251509          | 5,84E-05    | 0,007469598 |
| 0,344346501          | 3,61E-06    | 0,00147672  |
| 0,34371744           | 1,32E-05    | 0,003119137 |
| 0,34343741           | 7,42E-04    | 0,026489678 |
| 0,340622736          | 0,001935976 | 0,048748505 |
| 0,336191708          | 2,65E-05    | 0,004287068 |
| 0,333961819          | 3,25E-04    | 0,01850288  |
| 0,333132655          | 7,28E-05    | 0,008136516 |
| 0,33259502           | 1,09E-06    | 6,10E-04    |
| 0,330985567          | 0,001966213 | 0,04910737  |
| 0,326610891          | 2,60E-04    | 0,016840112 |

# Supplementary\_table\_S2

|             |             |             |
|-------------|-------------|-------------|
| 0,326349261 | 7,97E-05    | 0,008446266 |
| 0,326037606 | 0,001336677 | 0,038922004 |
| 2,418834038 | 3,24E-05    | 0,001970335 |
| 1,999079281 | 6,04E-04    | 0,012577491 |
| 1,94256871  | 0,001748884 | 0,024708788 |
| 1,922714588 | 3,94E-04    | 0,009664799 |
| 1,876413319 | 0,003383417 | 0,037943333 |
| 1,85812685  | 6,35E-04    | 0,013011861 |
| 1,790998943 | 0,001528166 | 0,022752499 |
| 1,593718288 | 0,001398883 | 0,021539802 |
| 1,577251057 | 0,001106995 | 0,018771646 |
| 1,558190275 | 4,15E-04    | 0,009972409 |
| 1,537597252 | 0,002316394 | 0,029701048 |
| 1,524669133 | 7,68E-04    | 0,014679326 |
| 1,471566596 | 0,003761196 | 0,040343791 |
| 1,431093023 | 8,84E-05    | 0,003654516 |
| 1,424524313 | 0,004597575 | 0,045621381 |
| 1,386573467 | 1,11E-04    | 0,004246399 |
| 1,381240486 | 0,002820966 | 0,033717389 |
| 1,320206131 | 4,22E-04    | 0,010048386 |
| 1,303082981 | 0,001477142 | 0,022274557 |
| 1,296180233 | 9,37E-04    | 0,016823018 |
| 1,262317125 | 0,004584898 | 0,045536162 |
| 1,244621564 | 1,76E-04    | 0,005735638 |
| 1,237441332 | 4,75E-04    | 0,01080474  |
| 1,210907505 | 0,002934518 | 0,03465408  |
| 1,19370296  | 0,002901126 | 0,034405688 |
| 1,189481501 | 0,001737696 | 0,024611739 |
| 1,189145877 | 0,001288367 | 0,020548027 |
| 1,182904334 | 0,002159213 | 0,028346591 |
| 1,182203488 | 0,00142177  | 0,021774239 |
| 1,176485729 | 6,09E-06    | 7,36E-04    |
| 1,176455603 | 7,07E-04    | 0,013892214 |
| 1,164625264 | 9,98E-04    | 0,017438748 |
| 1,16015222  | 4,92E-06    | 6,45E-04    |
| 1,157241543 | 3,34E-06    | 5,13E-04    |
| 1,156983615 | 0,004335127 | 0,044125511 |
| 1,152156977 | 3,20E-06    | 5,04E-04    |
| 1,126926533 | 0,003765934 | 0,04036327  |
| 1,125509514 | 0,001465351 | 0,022178925 |
| 1,120261628 | 0,001405738 | 0,02158469  |
| 1,119303383 | 0,003051426 | 0,035516784 |
| 1,115824524 | 7,41E-07    | 2,31E-04    |
| 1,108016913 | 0,004302625 | 0,044022306 |
| 1,10527537  | 0,002977879 | 0,034907008 |
| 1,102866808 | 5,66E-05    | 0,002769913 |
| 1,099254228 | 1,07E-06    | 2,71E-04    |
| 1,08872833  | 1,04E-04    | 0,004094156 |
| 1,082545455 | 0,003912477 | 0,041484741 |
| 1,081031712 | 1,37E-05    | 0,001164149 |
| 1,068864165 | 5,59E-06    | 7,01E-04    |
| 1,063328224 | 6,77E-05    | 0,003106515 |
| 1,056602537 | 0,002750472 | 0,033139581 |

# Supplementary\_table\_S2

|             |             |             |
|-------------|-------------|-------------|
| 1,051269556 | 5,75E-04    | 0,012208884 |
| 1,043084567 | 1,49E-04    | 0,005197203 |
| 1,037211945 | 3,96E-07    | 1,59E-04    |
| 1,0347426   | 3,88E-08    | 5,53E-05    |
| 1,034658034 | 1,70E-08    | 3,99E-05    |
| 1,033089323 | 0,001649699 | 0,02377568  |
| 1,030550211 | 3,09E-05    | 0,001926224 |
| 1,029939746 | 0,002359629 | 0,030056421 |
| 1,024249471 | 0,003046853 | 0,03550066  |
| 1,019031184 | 1,69E-06    | 3,54E-04    |
| 1,016922833 | 2,31E-04    | 0,006834019 |
| 1,015362051 | 6,26E-06    | 7,50E-04    |
| 1,010721459 | 3,96E-04    | 0,00969337  |
| 1,010551797 | 0,004155193 | 0,04322552  |
| 1,0097574   | 1,35E-04    | 0,004874403 |
| 1,009510571 | 1,60E-05    | 0,001271126 |
| 1,007606765 | 6,12E-05    | 0,002934596 |
| 1,007147992 | 0,001265121 | 0,020273251 |
| 1,001641121 | 2,58E-05    | 0,00173298  |
| 1,001598309 | 4,34E-04    | 0,010215739 |
| 0,99967389  | 0,003011692 | 0,035183003 |
| 0,99857611  | 2,70E-04    | 0,007602377 |
| 0,997704545 | 3,75E-12    | 1,67E-07    |
| 0,995406977 | 0,00461544  | 0,045669692 |
| 0,99429334  | 0,001168274 | 0,019338557 |
| 0,993884249 | 0,00374398  | 0,040227758 |
| 0,99367759  | 1,82E-04    | 0,005856129 |
| 0,992984144 | 5,52E-04    | 0,01197575  |
| 0,986332452 | 5,42E-06    | 6,87E-04    |
| 0,982867865 | 4,85E-07    | 1,80E-04    |
| 0,98066649  | 4,88E-04    | 0,011028096 |
| 0,976872093 | 3,84E-06    | 5,58E-04    |
| 0,976770613 | 4,00E-04    | 0,009757706 |
| 0,976629493 | 2,08E-06    | 3,84E-04    |
| 0,975559197 | 8,61E-05    | 0,003611058 |
| 0,974804968 | 1,65E-06    | 3,53E-04    |
| 0,974424947 | 1,96E-05    | 0,001474572 |
| 0,971721987 | 0,004942268 | 0,047806381 |
| 0,97114482  | 1,88E-06    | 3,66E-04    |
| 0,969188161 | 0,001509387 | 0,022592118 |
| 0,968891121 | 7,41E-04    | 0,014343636 |
| 0,968801797 | 0,003477565 | 0,03851823  |
| 0,96680444  | 8,26E-04    | 0,01538217  |
| 0,965330867 | 0,00156966  | 0,023120972 |
| 0,964357294 | 5,20E-07    | 1,87E-04    |
| 0,962972516 | 1,31E-05    | 0,001132287 |
| 0,96070666  | 6,94E-05    | 0,003163102 |
| 0,960684461 | 0,005245561 | 0,049682812 |
| 0,960534355 | 4,69E-08    | 5,81E-05    |
| 0,960385307 | 5,13E-04    | 0,011433521 |
| 0,9525074   | 6,77E-06    | 7,79E-04    |
| 0,950587738 | 0,001218412 | 0,019839004 |
| 0,950429175 | 5,98E-06    | 7,30E-04    |

# Supplementary\_table\_S2

|             |             |             |
|-------------|-------------|-------------|
| 0,948874736 | 6,40E-05    | 0,003012578 |
| 0,946059725 | 4,73E-09    | 1,91E-05    |
| 0,944592495 | 1,96E-04    | 0,006131281 |
| 0,944330338 | 2,39E-08    | 5,07E-05    |
| 0,942703488 | 0,001525018 | 0,022734408 |
| 0,938603594 | 3,31E-05    | 0,001989127 |
| 0,937939218 | 0,002505192 | 0,03127558  |
| 0,937413848 | 1,03E-04    | 0,00409329  |
| 0,936861522 | 0,003867219 | 0,041102541 |
| 0,93435148  | 0,001255575 | 0,020212623 |
| 0,933589323 | 4,28E-04    | 0,01014071  |
| 0,930272199 | 5,20E-06    | 6,68E-04    |
| 0,93002907  | 2,51E-04    | 0,007246812 |
| 0,927874736 | 9,03E-05    | 0,003700939 |
| 0,927552326 | 0,004204435 | 0,043475742 |
| 0,926221459 | 5,44E-04    | 0,011865083 |
| 0,92554334  | 0,003548508 | 0,038941796 |
| 0,923957717 | 1,05E-04    | 0,004105033 |
| 0,923062896 | 0,004962394 | 0,04790003  |
| 0,922229915 | 4,39E-06    | 5,98E-04    |
| 0,921929175 | 0,001528516 | 0,022752499 |
| 0,920614693 | 6,42E-04    | 0,013101756 |
| 0,919957188 | 0,002986986 | 0,034967748 |
| 0,919346723 | 6,57E-04    | 0,013299131 |
| 0,917005814 | 2,77E-05    | 0,001818956 |
| 0,916388478 | 8,09E-05    | 0,00347139  |
| 0,916090909 | 1,10E-04    | 0,004239262 |
| 0,915593023 | 3,36E-06    | 5,13E-04    |
| 0,913036469 | 0,001378169 | 0,021345322 |
| 0,912912791 | 3,40E-04    | 0,008720464 |
| 0,910795455 | 5,95E-07    | 2,07E-04    |
| 0,908098837 | 0,001236341 | 0,020027944 |
| 0,906877907 | 0,001176805 | 0,01943627  |
| 0,906776956 | 0,001150476 | 0,019172013 |
| 0,906049683 | 0,002256036 | 0,029238543 |
| 0,905537526 | 5,90E-05    | 0,002854743 |
| 0,905268499 | 5,95E-06    | 7,30E-04    |
| 0,904448732 | 7,39E-04    | 0,014323063 |
| 0,903925476 | 4,31E-06    | 5,93E-04    |
| 0,903272727 | 0,003200192 | 0,036573513 |
| 0,902875793 | 7,15E-05    | 0,003212301 |
| 0,902125264 | 7,81E-07    | 2,31E-04    |
| 0,900902748 | 0,001705589 | 0,024319388 |
| 0,899775899 | 0,002745801 | 0,033110172 |
| 0,899689218 | 2,22E-04    | 0,006659823 |
| 0,896319767 | 9,98E-07    | 2,62E-04    |
| 0,896048626 | 3,41E-04    | 0,008725273 |
| 0,895662791 | 2,20E-06    | 3,97E-04    |
| 0,895235201 | 1,70E-05    | 0,001322796 |
| 0,894441332 | 0,002643315 | 0,032391696 |
| 0,892684461 | 3,75E-04    | 0,009305519 |
| 0,88857981  | 8,51E-06    | 8,69E-04    |
| 0,885403805 | 0,002870183 | 0,034147824 |

# Supplementary\_table\_S2

|             |             |             |
|-------------|-------------|-------------|
| 0,882257928 | 5,64E-08    | 5,89E-05    |
| 0,881120507 | 1,40E-04    | 0,004976299 |
| 0,880664905 | 3,48E-11    | 7,75E-07    |
| 0,880516913 | 3,04E-05    | 0,001911084 |
| 0,880512156 | 0,001201251 | 0,019655014 |
| 0,877934461 | 2,00E-04    | 0,006203376 |
| 0,877911734 | 4,98E-04    | 0,011204493 |
| 0,877789112 | 5,44E-04    | 0,011865083 |
| 0,875899049 | 1,01E-06    | 2,63E-04    |
| 0,875707717 | 2,92E-05    | 0,001866567 |
| 0,875653805 | 0,003209581 | 0,036630181 |
| 0,875157505 | 8,24E-09    | 2,82E-05    |
| 0,872922833 | 2,13E-04    | 0,006483092 |
| 0,872108351 | 4,49E-08    | 5,81E-05    |
| 0,871005285 | 7,29E-04    | 0,014205812 |
| 0,870250529 | 5,10E-04    | 0,011390052 |
| 0,869882664 | 5,36E-05    | 0,002661235 |
| 0,866022199 | 0,003139162 | 0,036089559 |
| 0,865941332 | 7,35E-04    | 0,014261239 |
| 0,865530127 | 0,003456177 | 0,038392006 |
| 0,8639963   | 0,004162337 | 0,043260875 |
| 0,86397463  | 1,69E-04    | 0,005589448 |
| 0,861258985 | 4,04E-05    | 0,002279965 |
| 0,861183404 | 0,001052187 | 0,01809599  |
| 0,855928647 | 2,36E-04    | 0,006932556 |
| 0,855630021 | 4,51E-04    | 0,010460185 |
| 0,855469345 | 0,001481292 | 0,022306514 |
| 0,854582981 | 1,44E-07    | 1,01E-04    |
| 0,853616808 | 1,37E-06    | 3,17E-04    |
| 0,851964588 | 0,005276267 | 0,049909967 |
| 0,851360465 | 5,68E-06    | 7,08E-04    |
| 0,8510074   | 4,18E-04    | 0,009992372 |
| 0,849542283 | 0,003545189 | 0,038924547 |
| 0,849473573 | 4,79E-06    | 6,42E-04    |
| 0,847889535 | 2,78E-05    | 0,001821276 |
| 0,846187104 | 0,002485726 | 0,031102303 |
| 0,845951374 | 1,41E-04    | 0,004995481 |
| 0,845011099 | 2,63E-04    | 0,007462687 |
| 0,844998943 | 1,76E-07    | 1,02E-04    |
| 0,844519027 | 5,87E-05    | 0,002842762 |
| 0,844056025 | 1,60E-08    | 3,96E-05    |
| 0,843798626 | 4,14E-06    | 5,83E-04    |
| 0,842414905 | 1,26E-06    | 3,04E-04    |
| 0,841770085 | 0,003317302 | 0,037481244 |
| 0,841114693 | 4,84E-04    | 0,010955962 |
| 0,83977167  | 2,49E-07    | 1,19E-04    |
| 0,839752643 | 1,14E-07    | 9,12E-05    |
| 0,839290698 | 0,003269043 | 0,037156478 |
| 0,838565011 | 8,70E-06    | 8,78E-04    |
| 0,838489429 | 4,33E-06    | 5,93E-04    |
| 0,837914376 | 0,00336073  | 0,037755451 |
| 0,837469873 | 0,004874145 | 0,0472912   |
| 0,836860994 | 5,03E-04    | 0,011290289 |

# Supplementary\_table\_S2

|             |             |             |
|-------------|-------------|-------------|
| 0,836476744 | 2,43E-07    | 1,19E-04    |
| 0,834964059 | 7,52E-07    | 2,31E-04    |
| 0,834238901 | 0,002734676 | 0,033060917 |
| 0,834117865 | 9,72E-04    | 0,017142881 |
| 0,833511099 | 1,21E-04    | 0,004547059 |
| 0,832947146 | 3,46E-04    | 0,008818933 |
| 0,832563953 | 8,04E-05    | 0,003468463 |
| 0,831858879 | 1,79E-07    | 1,02E-04    |
| 0,83169186  | 4,51E-04    | 0,010463245 |
| 0,831213002 | 0,003843139 | 0,040934667 |
| 0,828645349 | 1,91E-04    | 0,006022449 |
| 0,828131607 | 1,62E-05    | 0,001281749 |
| 0,827269027 | 7,53E-06    | 8,23E-04    |
| 0,827050211 | 0,001649843 | 0,02377568  |
| 0,826692389 | 9,22E-06    | 9,13E-04    |
| 0,825541755 | 7,12E-04    | 0,013957257 |
| 0,825400106 | 4,76E-04    | 0,010812604 |
| 0,825100423 | 1,28E-08    | 3,80E-05    |
| 0,824437104 | 1,05E-04    | 0,004110075 |
| 0,824366279 | 1,90E-04    | 0,006012071 |
| 0,823976744 | 9,21E-05    | 0,003745886 |
| 0,822740486 | 0,001324851 | 0,020816289 |
| 0,822150634 | 0,001619368 | 0,023572924 |
| 0,821751586 | 1,85E-04    | 0,005918122 |
| 0,820189218 | 6,09E-04    | 0,012641815 |
| 0,820012156 | 5,31E-05    | 0,002650117 |
| 0,81982241  | 0,001200745 | 0,019655014 |
| 0,819662791 | 1,58E-06    | 3,42E-04    |
| 0,819586681 | 1,02E-05    | 9,68E-04    |
| 0,819381078 | 1,22E-04    | 0,004565261 |
| 0,819129493 | 1,11E-04    | 0,004239262 |
| 0,818010571 | 1,35E-04    | 0,004874403 |
| 0,817687632 | 5,00E-04    | 0,011237271 |
| 0,814481501 | 5,47E-09    | 2,03E-05    |
| 0,814199789 | 5,22E-05    | 0,002616381 |
| 0,813239958 | 1,82E-04    | 0,005856743 |
| 0,813019027 | 2,19E-04    | 0,006606841 |
| 0,812124736 | 5,18E-08    | 5,89E-05    |
| 0,812062896 | 2,58E-04    | 0,007391856 |
| 0,812000529 | 0,00440141  | 0,044497591 |
| 0,811813425 | 3,31E-04    | 0,008539003 |
| 0,811694503 | 0,0011085   | 0,018788828 |
| 0,811588266 | 4,31E-06    | 5,93E-04    |
| 0,810865222 | 1,41E-05    | 0,001185823 |
| 0,809951374 | 9,79E-06    | 9,52E-04    |
| 0,809268499 | 0,001403385 | 0,021570866 |
| 0,809146934 | 9,39E-08    | 8,64E-05    |
| 0,806513214 | 8,80E-06    | 8,83E-04    |
| 0,805987315 | 1,70E-04    | 0,00559584  |
| 0,80519556  | 3,84E-04    | 0,009461867 |
| 0,80480444  | 0,00178648  | 0,025021877 |
| 0,804617336 | 4,17E-04    | 0,009989073 |
| 0,803500529 | 2,46E-10    | 3,65E-06    |



# Supplementary\_table\_S2

|             |             |             |
|-------------|-------------|-------------|
| 0,803433932 | 4,22E-06    | 5,88E-04    |
| 0,802628436 | 0,001924037 | 0,026169255 |
| 0,802628436 | 7,27E-04    | 0,014179653 |
| 0,802607294 | 1,44E-07    | 1,01E-04    |
| 0,802417548 | 2,30E-04    | 0,006830579 |
| 0,802199789 | 7,56E-07    | 2,31E-04    |
| 0,802056554 | 0,00450608  | 0,045064623 |
| 0,801738901 | 9,87E-04    | 0,017336748 |
| 0,800715645 | 5,43E-04    | 0,011865083 |
| 0,800692389 | 1,93E-04    | 0,006065689 |
| 0,799715645 | 5,87E-07    | 2,06E-04    |
| 0,799561311 | 2,63E-04    | 0,007469042 |
| 0,799511099 | 5,77E-06    | 7,14E-04    |
| 0,798272727 | 0,004411467 | 0,044528522 |
| 0,797474101 | 7,68E-04    | 0,014681711 |
| 0,796315539 | 5,36E-04    | 0,011767563 |
| 0,796204545 | 0,004161231 | 0,043260875 |
| 0,794157505 | 6,09E-06    | 7,36E-04    |
| 0,79380074  | 1,97E-07    | 1,07E-04    |
| 0,793614165 | 0,001422482 | 0,021774239 |
| 0,792425476 | 3,51E-08    | 5,53E-05    |
| 0,792202431 | 2,00E-05    | 0,001493338 |
| 0,792088266 | 3,13E-04    | 0,008302485 |
| 0,791472516 | 8,90E-04    | 0,01618331  |
| 0,791365751 | 2,00E-09    | 1,49E-05    |
| 0,790682347 | 3,08E-08    | 5,49E-05    |
| 0,790567653 | 0,004336869 | 0,044125511 |
| 0,790262685 | 0,001226876 | 0,019931635 |
| 0,790091966 | 2,50E-06    | 4,31E-04    |
| 0,789930761 | 9,61E-05    | 0,003882573 |
| 0,78972093  | 3,60E-05    | 0,002087579 |
| 0,789658562 | 0,002179158 | 0,028499244 |
| 0,789424947 | 3,08E-05    | 0,001925126 |
| 0,78897833  | 0,003343013 | 0,037622834 |
| 0,788882135 | 3,65E-07    | 1,52E-04    |
| 0,78864852  | 0,001982993 | 0,02665372  |
| 0,788643235 | 1,71E-06    | 3,57E-04    |
| 0,7884963   | 0,001993908 | 0,026768121 |
| 0,788208774 | 1,59E-04    | 0,005386936 |
| 0,787395877 | 3,02E-06    | 4,84E-04    |
| 0,78641649  | 1,80E-04    | 0,005807147 |
| 0,785202431 | 1,87E-05    | 0,001417843 |
| 0,784747357 | 4,40E-04    | 0,010291188 |
| 0,784306025 | 8,78E-07    | 2,43E-04    |
| 0,784171247 | 4,82E-04    | 0,010938256 |
| 0,784078753 | 5,15E-06    | 6,63E-04    |
| 0,783790169 | 4,71E-04    | 0,010750193 |
| 0,783569767 | 1,05E-06    | 2,69E-04    |
| 0,783443446 | 8,42E-06    | 8,65E-04    |
| 0,782991543 | 0,003791669 | 0,040509447 |
| 0,782807082 | 0,002839471 | 0,033863823 |
| 0,782493129 | 2,20E-06    | 3,97E-04    |
| 0,782042812 | 1,20E-05    | 0,001066623 |

# Supplementary\_table\_S2

|             |             |             |
|-------------|-------------|-------------|
| 0,779263742 | 0,001532983 | 0,022776921 |
| 0,778671776 | 1,01E-04    | 0,004044624 |
| 0,77696723  | 3,23E-04    | 0,008446399 |
| 0,776937632 | 3,25E-05    | 0,00197257  |
| 0,776661734 | 2,75E-07    | 1,25E-04    |
| 0,776318182 | 3,67E-06    | 5,43E-04    |
| 0,775335624 | 3,64E-04    | 0,009105395 |
| 0,77512315  | 4,95E-07    | 1,80E-04    |
| 0,774588795 | 2,16E-05    | 0,001562278 |
| 0,774459302 | 1,24E-06    | 3,00E-04    |
| 0,774386892 | 6,42E-05    | 0,00301735  |
| 0,774330338 | 1,89E-06    | 0,000366552 |
| 0,774112051 | 0,002965258 | 0,034865552 |
| 0,773137421 | 2,17E-06    | 3,97E-04    |
| 0,773135835 | 7,51E-05    | 0,003316898 |
| 0,772218816 | 6,12E-04    | 0,012669117 |
| 0,771950846 | 6,68E-05    | 0,003086127 |
| 0,771873679 | 1,78E-07    | 1,02E-04    |
| 0,771559197 | 6,74E-05    | 0,003099929 |
| 0,770589852 | 0,00476529  | 0,046549363 |
| 0,770466702 | 0,001365287 | 0,021234403 |
| 0,770461945 | 2,49E-04    | 0,007205528 |
| 0,770145877 | 0,004714474 | 0,046262045 |
| 0,770004228 | 4,46E-05    | 0,002396026 |
| 0,769812368 | 7,28E-05    | 0,003256747 |
| 0,769693975 | 0,003089527 | 0,035717589 |
| 0,769387949 | 0,001873199 | 0,025713337 |
| 0,769076638 | 0,002198956 | 0,028690769 |
| 0,768792812 | 1,20E-04    | 0,004519639 |
| 0,768761099 | 0,001832264 | 0,025362448 |
| 0,768290698 | 5,77E-04    | 0,012217603 |
| 0,768234144 | 0,002192814 | 0,0286526   |
| 0,768169133 | 1,39E-04    | 0,004976299 |
| 0,768030127 | 1,59E-04    | 0,005386936 |
| 0,767766385 | 0,003950352 | 0,041767024 |
| 0,767591966 | 9,99E-04    | 0,017441169 |
| 0,76757241  | 0,001545613 | 0,022873018 |
| 0,767216702 | 1,04E-04    | 0,004094156 |
| 0,766268499 | 0,003771857 | 0,040390707 |
| 0,766107822 | 0,00217667  | 0,028478286 |
| 0,765954545 | 0,004236687 | 0,043644536 |
| 0,765646406 | 9,63E-07    | 2,59E-04    |
| 0,765262685 | 0,001016107 | 0,017645855 |
| 0,76511945  | 1,55E-04    | 0,00531987  |
| 0,765081924 | 0,002555004 | 0,031637634 |
| 0,764643763 | 2,98E-05    | 0,001883356 |
| 0,764500529 | 0,004632378 | 0,045762839 |
| 0,764490486 | 8,21E-05    | 0,003498171 |
| 0,764406977 | 0,002835677 | 0,033832436 |
| 0,764241015 | 0,001819458 | 0,02527157  |
| 0,764030655 | 4,67E-04    | 0,01068376  |
| 0,764006871 | 7,55E-04    | 0,014518574 |
| 0,763867336 | 0,00121945  | 0,019839004 |

# Supplementary\_table\_S2

|             |             |             |
|-------------|-------------|-------------|
| 0,763779598 | 3,63E-04    | 0,009093356 |
| 0,761910677 | 8,10E-05    | 0,00347139  |
| 0,761799154 | 1,17E-04    | 0,00442011  |
| 0,761132664 | 0,001222064 | 0,019867008 |
| 0,761117865 | 0,005228667 | 0,04957882  |
| 0,760089852 | 2,07E-05    | 0,001531483 |
| 0,759612579 | 2,53E-06    | 4,31E-04    |
| 0,759205074 | 8,36E-04    | 0,015491598 |
| 0,758977801 | 0,001377913 | 0,021345322 |
| 0,758540698 | 2,30E-07    | 1,19E-04    |
| 0,757349894 | 1,51E-05    | 0,001233839 |
| 0,7565037   | 2,09E-05    | 0,001543341 |
| 0,756353594 | 5,61E-05    | 0,002759165 |
| 0,756341438 | 2,89E-06    | 4,70E-04    |
| 0,756302854 | 0,001883039 | 0,025808638 |
| 0,756172833 | 8,20E-06    | 8,55E-04    |
| 0,756138478 | 4,13E-05    | 0,002295678 |
| 0,755798097 | 1,08E-06    | 2,71E-04    |
| 0,755786469 | 6,43E-04    | 0,013101756 |
| 0,755599366 | 3,29E-05    | 0,001984078 |
| 0,755515328 | 2,49E-07    | 1,19E-04    |
| 0,755414376 | 0,003707402 | 0,040024851 |
| 0,754817653 | 0,002717057 | 0,032968933 |
| 0,754485201 | 1,12E-06    | 2,75E-04    |
| 0,753694503 | 3,52E-04    | 0,00890974  |
| 0,75368129  | 0,001467953 | 0,022199084 |
| 0,753321353 | 8,36E-04    | 0,015491598 |
| 0,753301797 | 4,70E-05    | 0,002458825 |
| 0,753143235 | 7,83E-04    | 0,014836369 |
| 0,752965116 | 6,95E-04    | 0,013735308 |
| 0,75269186  | 9,63E-06    | 9,42E-04    |
| 0,752659619 | 7,91E-05    | 0,003429092 |
| 0,752486786 | 1,52E-06    | 3,40E-04    |
| 0,752442389 | 6,54E-06    | 7,62E-04    |
| 0,752409619 | 4,78E-05    | 0,002479468 |
| 0,75239482  | 1,79E-06    | 3,63E-04    |
| 0,752041755 | 5,89E-04    | 0,012377363 |
| 0,75202537  | 4,23E-04    | 0,010071272 |
| 0,751075053 | 0,005208935 | 0,049512338 |
| 0,750780655 | 9,77E-05    | 0,003939475 |
| 0,750471459 | 6,63E-05    | 0,003074296 |
| 0,750366279 | 6,93E-04    | 0,013724255 |
| 0,750110465 | 7,97E-04    | 0,015008697 |
| 0,749829281 | 0,002004749 | 0,026865085 |
| 0,749816068 | 1,68E-06    | 3,54E-04    |
| 0,749500529 | 0,002753867 | 0,03315805  |
| 0,749419133 | 3,47E-05    | 0,002050321 |
| 0,749204017 | 2,55E-07    | 1,21E-04    |
| 0,748941332 | 0,00209898  | 0,027760385 |
| 0,748936575 | 0,002312226 | 0,029673229 |
| 0,748896406 | 3,05E-04    | 0,008148423 |
| 0,747798626 | 9,89E-08    | 8,64E-05    |
| 0,747690803 | 0,001372872 | 0,021314731 |

# Supplementary\_table\_S2

|             |             |             |
|-------------|-------------|-------------|
| 0,747388478 | 6,50E-05    | 0,003042768 |
| 0,747367336 | 7,76E-05    | 0,003387102 |
| 0,747151691 | 2,31E-04    | 0,00683738  |
| 0,746524313 | 8,91E-07    | 2,43E-04    |
| 0,746289112 | 6,58E-04    | 0,013301696 |
| 0,745928647 | 0,001396758 | 0,02152844  |
| 0,745140592 | 9,09E-05    | 0,003714145 |
| 0,744899049 | 3,74E-04    | 0,009281936 |
| 0,743350423 | 1,33E-05    | 0,001151746 |
| 0,743222516 | 2,03E-06    | 3,79E-04    |
| 0,74282981  | 7,89E-07    | 2,31E-04    |
| 0,741433932 | 0,001249764 | 0,020141666 |
| 0,741337738 | 0,001669431 | 0,023941766 |
| 0,740296512 | 0,002342664 | 0,029921995 |
| 0,73884778  | 4,59E-08    | 5,81E-05    |
| 0,738819767 | 6,85E-06    | 7,85E-04    |
| 0,737385835 | 4,30E-07    | 1,68E-04    |
| 0,737061839 | 0,001318699 | 0,020768523 |
| 0,737056025 | 1,76E-04    | 0,005744748 |
| 0,736763742 | 6,73E-05    | 0,003097837 |
| 0,736448732 | 0,001894184 | 0,02590398  |
| 0,735879493 | 2,26E-05    | 0,001599003 |
| 0,735425476 | 0,004780518 | 0,046667411 |
| 0,734895877 | 0,003541036 | 0,038898126 |
| 0,734801268 | 4,08E-05    | 0,002285797 |
| 0,734439218 | 0,004694273 | 0,046159316 |
| 0,733988901 | 3,11E-09    | 1,54E-05    |
| 0,733622622 | 0,004365571 | 0,044326416 |
| 0,733179704 | 0,003519121 | 0,038714676 |
| 0,733147463 | 2,26E-05    | 0,001599003 |
| 0,732770613 | 9,11E-06    | 9,06E-04    |
| 0,732378964 | 5,36E-04    | 0,011768168 |
| 0,732145877 | 3,20E-05    | 0,001958212 |
| 0,732116279 | 2,41E-04    | 0,007041381 |
| 0,73192019  | 1,60E-04    | 0,005403379 |
| 0,731825053 | 7,82E-07    | 2,31E-04    |
| 0,730149577 | 0,001647132 | 0,023775293 |
| 0,729430761 | 1,90E-04    | 0,006020961 |
| 0,729259514 | 9,83E-06    | 9,54E-04    |
| 0,729037526 | 9,42E-04    | 0,016845832 |
| 0,728686047 | 0,00367233  | 0,039785485 |
| 0,728348309 | 4,41E-04    | 0,010299269 |
| 0,727894292 | 3,67E-04    | 0,009141185 |
| 0,727659091 | 6,49E-06    | 7,62E-04    |
| 0,727175476 | 0,002480183 | 0,031050391 |
| 0,72642759  | 1,79E-04    | 0,005801157 |
| 0,725352537 | 8,89E-07    | 2,43E-04    |
| 0,724975159 | 4,88E-07    | 1,80E-04    |
| 0,72387685  | 1,20E-07    | 9,25E-05    |
| 0,723802854 | 8,06E-04    | 0,01514285  |
| 0,723121564 | 0,001681201 | 0,024056353 |
| 0,72280444  | 0,001448633 | 0,022032446 |
| 0,722743658 | 5,62E-04    | 0,012058374 |

# Supplementary\_table\_S2

|             |             |             |
|-------------|-------------|-------------|
| 0,722651691 | 5,44E-04    | 0,011865083 |
| 0,721826638 | 0,003253988 | 0,037013703 |
| 0,721749471 | 5,60E-04    | 0,012055378 |
| 0,721396406 | 6,92E-06    | 7,89E-04    |
| 0,721309725 | 5,26E-05    | 0,002630461 |
| 0,721113636 | 1,67E-04    | 0,00554301  |
| 0,720694503 | 7,41E-06    | 8,19E-04    |
| 0,720693446 | 1,81E-07    | 1,02E-04    |
| 0,72057241  | 0,002659995 | 0,032495221 |
| 0,720367865 | 3,45E-05    | 0,002045664 |
| 0,72032981  | 3,17E-04    | 0,008324846 |
| 0,720087738 | 8,50E-05    | 0,003578629 |
| 0,719983087 | 1,24E-05    | 0,001094687 |
| 0,719633721 | 1,56E-06    | 3,40E-04    |
| 0,719270085 | 0,002519969 | 0,031374489 |
| 0,719261628 | 0,001745421 | 0,024685986 |
| 0,719074524 | 1,54E-05    | 0,001248099 |
| 0,718859408 | 0,002556106 | 0,031637634 |
| 0,71780814  | 1,04E-04    | 0,004094156 |
| 0,717797569 | 0,002525377 | 0,031418958 |
| 0,717305497 | 8,79E-04    | 0,016047938 |
| 0,716809197 | 2,64E-06    | 4,45E-04    |
| 0,716218288 | 1,95E-06    | 3,70E-04    |
| 0,716132135 | 6,59E-04    | 0,013308319 |
| 0,716071882 | 3,59E-04    | 0,009018869 |
| 0,714987844 | 4,29E-05    | 0,002349422 |
| 0,714966173 | 0,004070475 | 0,042707216 |
| 0,714436047 | 4,50E-05    | 0,00240429  |
| 0,713789112 | 2,64E-04    | 0,007477706 |
| 0,713763742 | 7,13E-04    | 0,013971714 |
| 0,713357822 | 7,59E-06    | 8,23E-04    |
| 0,713169133 | 1,00E-05    | 9,62E-04    |
| 0,712437632 | 2,37E-07    | 1,19E-04    |
| 0,712264271 | 1,56E-07    | 1,01E-04    |
| 0,712263214 | 0,002903164 | 0,034406175 |
| 0,712203488 | 9,37E-04    | 0,016823018 |
| 0,712189218 | 9,89E-04    | 0,017352697 |
| 0,712077696 | 1,53E-06    | 3,40E-04    |
| 0,711956131 | 5,37E-04    | 0,011777764 |
| 0,711673362 | 3,41E-04    | 0,008721042 |
| 0,711295455 | 0,003655966 | 0,039645877 |
| 0,710325053 | 8,08E-05    | 0,00347139  |
| 0,710164905 | 6,96E-05    | 0,003165786 |
| 0,710059197 | 6,12E-07    | 2,10E-04    |
| 0,70933351  | 0,003852598 | 0,041015801 |
| 0,708912262 | 0,002340095 | 0,029910243 |
| 0,708772727 | 5,69E-08    | 5,89E-05    |
| 0,708660677 | 2,80E-04    | 0,007732976 |
| 0,708599366 | 0,001238748 | 0,020036162 |
| 0,70835518  | 4,76E-05    | 0,002473781 |
| 0,70822833  | 0,00183752  | 0,025395741 |
| 0,708132135 | 0,001486033 | 0,022347692 |
| 0,707602537 | 2,47E-07    | 1,19E-04    |

# Supplementary\_table\_S2

|             |             |             |
|-------------|-------------|-------------|
| 0,707364693 | 6,60E-04    | 0,01331298  |
| 0,707162262 | 1,74E-05    | 0,001342792 |
| 0,706978858 | 4,02E-04    | 0,009780498 |
| 0,706821353 | 2,27E-05    | 0,001603585 |
| 0,706553911 | 1,88E-04    | 0,005994917 |
| 0,706278013 | 0,002129879 | 0,028069027 |
| 0,705766913 | 2,63E-04    | 0,007469042 |
| 0,705661734 | 2,69E-06    | 4,51E-04    |
| 0,705022727 | 4,79E-04    | 0,010873195 |
| 0,704738372 | 2,07E-04    | 0,006360711 |
| 0,704563425 | 0,003547771 | 0,038941796 |
| 0,703616279 | 0,001280173 | 0,020446045 |
| 0,702910677 | 3,24E-04    | 0,008463664 |
| 0,702860994 | 1,34E-04    | 0,004846643 |
| 0,702824524 | 2,50E-05    | 0,001699294 |
| 0,702056554 | 1,09E-06    | 2,71E-04    |
| 0,70172833  | 3,98E-08    | 5,53E-05    |
| 0,701679704 | 0,001847521 | 0,025492144 |
| 0,701196617 | 0,002065411 | 0,027454985 |
| 0,701173362 | 0,001453394 | 0,02205041  |
| 0,700852537 | 3,87E-06    | 5,58E-04    |
| 0,700727801 | 4,18E-04    | 0,009992372 |
| 0,700683932 | 4,46E-05    | 0,002396026 |
| 0,70055074  | 4,35E-05    | 0,002369416 |
| 0,700342495 | 1,48E-04    | 0,005184191 |
| 0,700338266 | 7,55E-05    | 0,003322643 |
| 0,700102537 | 0,002296116 | 0,029566639 |
| 0,700080338 | 0,003539082 | 0,038886253 |
| 0,700011628 | 1,17E-05    | 0,001051959 |
| 0,699343023 | 6,36E-04    | 0,013016024 |
| 0,699280655 | 1,02E-06    | 2,63E-04    |
| 0,699147463 | 9,73E-07    | 2,59E-04    |
| 0,698734672 | 9,71E-06    | 9,46E-04    |
| 0,698696617 | 0,0018497   | 0,025500784 |
| 0,698581395 | 5,41E-05    | 0,002681146 |
| 0,698460359 | 1,04E-04    | 0,004094156 |
| 0,698258985 | 3,42E-04    | 0,008746318 |
| 0,697990486 | 7,88E-06    | 8,32E-04    |
| 0,69729334  | 2,86E-05    | 0,001862274 |
| 0,69669186  | 5,50E-08    | 5,89E-05    |
| 0,696544926 | 1,93E-06    | 3,70E-04    |
| 0,696201374 | 1,01E-04    | 0,004050611 |
| 0,695791226 | 0,002070449 | 0,027513744 |
| 0,695761099 | 0,00268727  | 0,032732232 |
| 0,695651691 | 8,48E-04    | 0,015654901 |
| 0,695436047 | 5,07E-04    | 0,011358438 |
| 0,695043869 | 0,001647891 | 0,023775293 |
| 0,694464059 | 3,69E-04    | 0,009176939 |
| 0,694322939 | 3,59E-05    | 0,002087579 |
| 0,69415592  | 4,13E-05    | 0,002295678 |
| 0,694031712 | 6,73E-04    | 0,013500026 |
| 0,693068182 | 0,002966992 | 0,034865552 |
| 0,692434989 | 2,71E-04    | 0,007609606 |

# Supplementary\_table\_S2

|             |             |             |
|-------------|-------------|-------------|
| 0,692433932 | 8,26E-05    | 0,003512233 |
| 0,69212685  | 0,004025974 | 0,042365454 |
| 0,69197463  | 0,0023705   | 0,030134573 |
| 0,691811839 | 0,001473527 | 0,022234684 |
| 0,691807611 | 0,003083104 | 0,035671111 |
| 0,691574524 | 0,00336562  | 0,037800854 |
| 0,691011099 | 4,63E-06    | 6,25E-04    |
| 0,690984144 | 1,90E-07    | 1,05E-04    |
| 0,690766385 | 0,003469276 | 0,038466303 |
| 0,690115751 | 0,002302079 | 0,02962837  |
| 0,688977273 | 7,39E-05    | 0,003280167 |
| 0,688410677 | 2,78E-04    | 0,007702264 |
| 0,688195032 | 7,78E-06    | 8,29E-04    |
| 0,688164905 | 1,48E-08    | 3,87E-05    |
| 0,688143235 | 1,05E-04    | 0,004112788 |
| 0,687258985 | 2,51E-05    | 0,001700039 |
| 0,686878964 | 0,001322055 | 0,020787016 |
| 0,686693446 | 2,47E-05    | 0,001687449 |
| 0,686396934 | 8,82E-06    | 8,83E-04    |
| 0,685959831 | 0,002860231 | 0,034065813 |
| 0,685635835 | 7,43E-06    | 8,19E-04    |
| 0,685557082 | 2,77E-04    | 0,0076952   |
| 0,685062368 | 4,15E-05    | 0,002295678 |
| 0,684765328 | 9,14E-04    | 0,016525274 |
| 0,684738901 | 0,00170452  | 0,024311926 |
| 0,684621036 | 4,57E-04    | 0,010543218 |
| 0,684281184 | 4,35E-05    | 0,002369675 |
| 0,683126321 | 3,58E-04    | 0,009013238 |
| 0,683118393 | 9,41E-04    | 0,016833945 |
| 0,683021142 | 0,003806389 | 0,040630669 |
| 0,682760042 | 6,87E-05    | 0,003138992 |
| 0,682326638 | 2,11E-05    | 0,001543562 |
| 0,681882135 | 1,09E-05    | 0,001016299 |
| 0,681850423 | 0,001068042 | 0,018302682 |
| 0,681764271 | 0,00471924  | 0,046272024 |
| 0,681750529 | 7,25E-06    | 8,07E-04    |
| 0,6815074   | 1,73E-06    | 3,58E-04    |
| 0,681352008 | 9,57E-04    | 0,016986886 |
| 0,680820296 | 0,001311483 | 0,020730549 |
| 0,680730973 | 1,25E-04    | 0,004634753 |
| 0,680472516 | 0,000103196 | 0,00409329  |
| 0,680455603 | 0,003895765 | 0,041337059 |
| 0,680280127 | 1,19E-05    | 0,001063493 |
| 0,680276956 | 1,51E-07    | 1,01E-04    |
| 0,679273784 | 0,001189026 | 0,019565568 |
| 0,679225687 | 6,26E-06    | 7,50E-04    |
| 0,679045983 | 3,07E-04    | 0,008171005 |
| 0,679031184 | 3,17E-04    | 0,008324846 |
| 0,678784884 | 0,005122074 | 0,048966369 |
| 0,678721459 | 1,40E-06    | 3,22E-04    |
| 0,67862685  | 2,18E-05    | 0,001567122 |
| 0,677983615 | 1,08E-04    | 0,004173632 |
| 0,677730973 | 4,05E-05    | 0,002280817 |

# Supplementary\_table\_S2

|             |             |             |
|-------------|-------------|-------------|
| 0,677403805 | 2,43E-05    | 0,001671314 |
| 0,677102008 | 3,80E-08    | 5,53E-05    |
| 0,676680233 | 2,34E-05    | 0,001631936 |
| 0,676563425 | 8,53E-06    | 8,69E-04    |
| 0,676220402 | 7,05E-04    | 0,013880078 |
| 0,676158562 | 3,54E-05    | 0,00208053  |
| 0,676060254 | 1,62E-04    | 0,005441346 |
| 0,675638478 | 0,003306128 | 0,037456486 |
| 0,675553911 | 1,59E-04    | 0,005386936 |
| 0,675391121 | 3,06E-04    | 0,008148423 |
| 0,675162791 | 9,51E-04    | 0,016928334 |
| 0,674464059 | 0,00101528  | 0,017645195 |
| 0,674196089 | 7,02E-06    | 7,93E-04    |
| 0,673948203 | 2,34E-04    | 0,006879986 |
| 0,673337209 | 5,13E-04    | 0,011434536 |
| 0,673017442 | 1,32E-06    | 3,11E-04    |
| 0,672806554 | 0,002512486 | 0,031313984 |
| 0,672729915 | 0,001246333 | 0,020114724 |
| 0,672142178 | 0,003602635 | 0,039322658 |
| 0,671856237 | 0,003198814 | 0,036572893 |
| 0,671703488 | 4,17E-04    | 0,009992372 |
| 0,671566596 | 1,05E-05    | 9,98E-04    |
| 0,671332981 | 1,99E-04    | 0,006187029 |
| 0,670960888 | 2,50E-05    | 0,001699294 |
| 0,670736786 | 6,35E-04    | 0,013003699 |
| 0,670402748 | 0,001648215 | 0,023775293 |
| 0,670094609 | 0,002704482 | 0,032852047 |
| 0,669901163 | 4,71E-04    | 0,010750193 |
| 0,66962685  | 2,98E-05    | 0,001883356 |
| 0,669086681 | 2,84E-06    | 4,64E-04    |
| 0,669064482 | 0,001312359 | 0,020737036 |
| 0,668879493 | 0,00457792  | 0,045521965 |
| 0,667641649 | 2,65E-05    | 0,001761829 |
| 0,667489958 | 0,004252462 | 0,043766556 |
| 0,667167548 | 0,003335963 | 0,037590977 |
| 0,665910148 | 1,55E-05    | 0,001256155 |
| 0,665849366 | 1,13E-05    | 0,0010264   |
| 0,665727801 | 2,62E-05    | 0,001751934 |
| 0,665594609 | 0,003434121 | 0,038291557 |
| 0,66532981  | 2,36E-07    | 1,19E-04    |
| 0,665249471 | 3,69E-04    | 0,009176939 |
| 0,665159619 | 0,001912122 | 0,026062904 |
| 0,664725159 | 1,13E-05    | 0,0010264   |
| 0,663940275 | 1,36E-05    | 0,001161591 |
| 0,663639006 | 6,86E-04    | 0,01367164  |
| 0,663559197 | 7,31E-10    | 8,14E-06    |
| 0,66304704  | 8,30E-06    | 8,56E-04    |
| 0,662840381 | 3,52E-04    | 0,00890974  |
| 0,662438689 | 1,89E-04    | 0,006012071 |
| 0,661977801 | 0,001126506 | 0,0189374   |
| 0,661895877 | 1,13E-05    | 0,0010264   |
| 0,661883192 | 4,71E-05    | 0,002458825 |
| 0,661763742 | 0,001154971 | 0,019203819 |



# Supplementary\_table\_S2

|             |             |             |
|-------------|-------------|-------------|
| 0,661667548 | 0,001264391 | 0,020273251 |
| 0,661459302 | 2,36E-06    | 0,000411684 |
| 0,661278013 | 1,09E-06    | 2,71E-04    |
| 0,660692389 | 1,10E-07    | 9,12E-05    |
| 0,660381078 | 1,33E-04    | 0,004830239 |
| 0,660352008 | 8,54E-07    | 2,43E-04    |
| 0,65973203  | 1,50E-04    | 0,005235277 |
| 0,659524841 | 4,42E-04    | 0,010303274 |
| 0,659491543 | 6,49E-08    | 6,57E-05    |
| 0,659172833 | 6,84E-04    | 0,013647932 |
| 0,658353066 | 1,30E-05    | 0,001124924 |
| 0,658022199 | 1,03E-04    | 0,004094156 |
| 0,657881078 | 1,67E-05    | 0,001302373 |
| 0,657692389 | 6,93E-04    | 0,013724255 |
| 0,65709778  | 7,58E-04    | 0,014543309 |
| 0,656667019 | 1,96E-05    | 0,001477462 |
| 0,656442918 | 1,29E-04    | 0,004733924 |
| 0,656211416 | 5,10E-04    | 0,011387241 |
| 0,656073467 | 1,40E-05    | 0,001181122 |
| 0,655896934 | 0,004469468 | 0,04483964  |
| 0,65519186  | 2,35E-06    | 0,000411684 |
| 0,655052326 | 0,001464881 | 0,022178925 |
| 0,654717759 | 1,33E-04    | 0,00482787  |
| 0,654258457 | 5,42E-04    | 0,011844716 |
| 0,65421723  | 1,83E-05    | 0,001392836 |
| 0,654210359 | 0,001119268 | 0,018877957 |
| 0,653976216 | 5,35E-07    | 1,91E-04    |
| 0,65377167  | 0,003439397 | 0,038291557 |
| 0,653621564 | 2,07E-04    | 0,006360711 |
| 0,652792283 | 2,05E-04    | 0,006336057 |
| 0,652701903 | 0,001081949 | 0,018472949 |
| 0,65230074  | 1,71E-05    | 0,001323825 |
| 0,650576638 | 0,004204736 | 0,043475742 |
| 0,650488901 | 9,87E-04    | 0,017336748 |
| 0,650386892 | 0,001275191 | 0,020381088 |
| 0,64947833  | 2,43E-05    | 0,001673747 |
| 0,649030655 | 0,004261137 | 0,043795131 |
| 0,648924947 | 2,92E-05    | 0,001866567 |
| 0,648694503 | 1,47E-05    | 0,001223516 |
| 0,648376321 | 9,22E-05    | 0,003746071 |
| 0,648230444 | 9,87E-04    | 0,017336748 |
| 0,647853594 | 1,49E-05    | 0,001230225 |
| 0,647524313 | 8,67E-04    | 0,015897873 |
| 0,647436575 | 0,00211389  | 0,027907864 |
| 0,64719926  | 4,29E-04    | 0,010145058 |
| 0,647060782 | 3,14E-05    | 0,001938712 |
| 0,646928118 | 3,68E-06    | 5,43E-04    |
| 0,646765856 | 1,95E-06    | 3,70E-04    |
| 0,64640592  | 6,78E-06    | 7,79E-04    |
| 0,64615592  | 9,39E-04    | 0,016823018 |
| 0,646035941 | 0,001818189 | 0,025263805 |
| 0,645705603 | 3,38E-06    | 5,13E-04    |
| 0,645428118 | 0,00399266  | 0,04208449  |

# Supplementary\_table\_S2

|             |             |             |
|-------------|-------------|-------------|
| 0,645158034 | 4,85E-06    | 6,43E-04    |
| 0,645082981 | 3,42E-05    | 0,002032448 |
| 0,644959302 | 9,67E-04    | 0,017082322 |
| 0,644542812 | 6,87E-05    | 0,003138992 |
| 0,644513742 | 0,001286907 | 0,020538878 |
| 0,644301797 | 1,40E-04    | 0,004976299 |
| 0,644167548 | 0,001346643 | 0,021084307 |
| 0,644084038 | 6,57E-04    | 0,013299131 |
| 0,644048626 | 9,44E-06    | 9,29E-04    |
| 0,64404334  | 9,41E-04    | 0,016833945 |
| 0,642208245 | 9,45E-04    | 0,016855012 |
| 0,641963531 | 3,86E-06    | 5,58E-04    |
| 0,641658034 | 5,01E-05    | 0,002559682 |
| 0,641587738 | 4,92E-06    | 6,45E-04    |
| 0,641539112 | 0,004847663 | 0,047075279 |
| 0,641447674 | 0,001730694 | 0,024543788 |
| 0,641195032 | 1,70E-07    | 1,01E-04    |
| 0,640997357 | 2,92E-04    | 0,007884729 |
| 0,640436047 | 3,18E-07    | 1,35E-04    |
| 0,639878964 | 1,67E-07    | 1,01E-04    |
| 0,639873679 | 5,22E-04    | 0,011582547 |
| 0,639571882 | 7,68E-05    | 0,003364229 |
| 0,639570296 | 3,28E-08    | 5,53E-05    |
| 0,639457188 | 6,56E-06    | 7,62E-04    |
| 0,638966702 | 4,59E-04    | 0,010572932 |
| 0,638816596 | 1,40E-04    | 0,004993368 |
| 0,638774841 | 0,002999418 | 0,035088221 |
| 0,638721987 | 1,19E-04    | 0,004485192 |
| 0,638491015 | 6,27E-04    | 0,012889904 |
| 0,638010042 | 0,001152543 | 0,019177764 |
| 0,637701903 | 3,72E-06    | 5,47E-04    |
| 0,637654334 | 2,66E-06    | 4,47E-04    |
| 0,636913319 | 1,87E-06    | 3,66E-04    |
| 0,636874736 | 0,001772041 | 0,024905017 |
| 0,63669186  | 0,002408816 | 0,030482475 |
| 0,6365037   | 0,00419785  | 0,043455503 |
| 0,636213531 | 5,19E-04    | 0,011526964 |
| 0,636039641 | 0,002195604 | 0,028672035 |
| 0,635721459 | 8,66E-06    | 8,77E-04    |
| 0,635433404 | 2,40E-05    | 0,001663187 |
| 0,635177061 | 2,22E-04    | 0,006655488 |
| 0,635035412 | 0,001029985 | 0,017792285 |
| 0,633899577 | 8,14E-05    | 0,003483468 |
| 0,633788584 | 0,004728767 | 0,046324648 |
| 0,633576638 | 2,85E-04    | 0,007759204 |
| 0,633499471 | 9,45E-04    | 0,01685263  |
| 0,633141649 | 3,22E-05    | 0,001964194 |
| 0,633127907 | 0,001493735 | 0,022425666 |
| 0,632589323 | 0,001139752 | 0,01904781  |
| 0,631932875 | 2,54E-06    | 4,31E-04    |
| 0,631616808 | 2,80E-07    | 1,25E-04    |
| 0,631407505 | 4,30E-04    | 0,010160829 |
| 0,630711416 | 7,88E-04    | 0,014909159 |

# Supplementary\_table\_S2

|             |             |             |
|-------------|-------------|-------------|
| 0,630708774 | 5,77E-04    | 0,012214826 |
| 0,630119979 | 9,56E-04    | 0,016978558 |
| 0,630084038 | 4,62E-07    | 1,77E-04    |
| 0,629876321 | 1,48E-05    | 0,0012271   |
| 0,629618922 | 2,35E-05    | 0,001631936 |
| 0,629319767 | 7,92E-04    | 0,014958655 |
| 0,629162262 | 4,62E-05    | 0,002436301 |
| 0,628976216 | 8,53E-04    | 0,015714799 |
| 0,628955603 | 0,003144492 | 0,036137321 |
| 0,628406977 | 1,16E-07    | 9,12E-05    |
| 0,628243129 | 0,001949971 | 0,026401073 |
| 0,628180761 | 4,21E-06    | 5,88E-04    |
| 0,628132664 | 8,48E-04    | 0,015654901 |
| 0,628094609 | 1,06E-06    | 2,70E-04    |
| 0,628005814 | 4,55E-09    | 1,91E-05    |
| 0,62768129  | 1,90E-04    | 0,006012071 |
| 0,627614693 | 9,75E-08    | 8,64E-05    |
| 0,627547569 | 0,005060317 | 0,048568578 |
| 0,626630021 | 0,004718226 | 0,046272024 |
| 0,626591438 | 7,75E-06    | 8,29E-04    |
| 0,626330867 | 9,02E-05    | 0,003699381 |
| 0,626237315 | 5,93E-04    | 0,012403501 |
| 0,624792283 | 3,88E-07    | 1,57E-04    |
| 0,624758457 | 5,23E-04    | 0,011588541 |
| 0,62468129  | 8,93E-04    | 0,016211432 |
| 0,624590381 | 1,54E-04    | 0,005316662 |
| 0,624496829 | 8,27E-04    | 0,01538217  |
| 0,62427167  | 7,64E-06    | 8,26E-04    |
| 0,624195032 | 0,00489439  | 0,047456621 |
| 0,624020085 | 5,79E-05    | 0,002820726 |
| 0,623744715 | 3,41E-04    | 0,008721042 |
| 0,623734672 | 0,004231581 | 0,043619232 |
| 0,623616808 | 6,93E-04    | 0,013724255 |
| 0,623389006 | 3,64E-05    | 0,002104509 |
| 0,623087738 | 4,34E-04    | 0,010224501 |
| 0,623087738 | 0,001317927 | 0,020768119 |
| 0,622616279 | 4,30E-04    | 0,010160829 |
| 0,62232981  | 3,54E-06    | 5,29E-04    |
| 0,622058668 | 0,00443443  | 0,044650533 |
| 0,621981501 | 1,59E-05    | 0,001271059 |
| 0,621727801 | 7,04E-05    | 0,003188109 |
| 0,621506871 | 0,001317905 | 0,020768119 |
| 0,621341966 | 0,002330893 | 0,029818296 |
| 0,621318182 | 1,87E-05    | 0,001416753 |
| 0,621158562 | 1,39E-04    | 0,004976299 |
| 0,621149049 | 3,80E-04    | 0,009402704 |
| 0,620923362 | 0,00135678  | 0,021190891 |
| 0,620863636 | 6,92E-04    | 0,013724255 |
| 0,620658562 | 4,50E-06    | 6,10E-04    |
| 0,620132135 | 6,23E-05    | 0,002965203 |
| 0,620125793 | 0,004493628 | 0,044980714 |
| 0,619952431 | 0,003071149 | 0,035597515 |
| 0,619591966 | 1,79E-05    | 0,001375149 |

# Supplementary\_table\_S2

|             |             |             |
|-------------|-------------|-------------|
| 0,619367865 | 1,64E-05    | 0,001288965 |
| 0,619134249 | 2,02E-05    | 0,00150334  |
| 0,618976744 | 0,003060731 | 0,035587889 |
| 0,6187426   | 0,001787999 | 0,025021877 |
| 0,61872833  | 1,80E-04    | 0,005807147 |
| 0,618581924 | 0,001855993 | 0,025571453 |
| 0,61812315  | 6,15E-04    | 0,012697223 |
| 0,617983615 | 0,00176277  | 0,024809113 |
| 0,617823996 | 3,15E-04    | 0,008303463 |
| 0,617774841 | 1,15E-06    | 2,81E-04    |
| 0,617754228 | 2,78E-04    | 0,007702264 |
| 0,617752114 | 2,92E-04    | 0,007884729 |
| 0,617742072 | 7,46E-06    | 8,19E-04    |
| 0,617397463 | 2,53E-06    | 4,31E-04    |
| 0,617254757 | 1,65E-04    | 0,00550079  |
| 0,617112051 | 1,00E-04    | 0,004019932 |
| 0,616970402 | 7,99E-04    | 0,015038423 |
| 0,616950846 | 2,87E-04    | 0,007795518 |
| 0,616730973 | 0,001821503 | 0,025290141 |
| 0,616703488 | 1,42E-04    | 0,005027842 |
| 0,616653805 | 3,01E-04    | 0,008053731 |
| 0,616650634 | 0,001801933 | 0,025151746 |
| 0,615929175 | 0,00452112  | 0,045144306 |
| 0,615899577 | 0,004358243 | 0,044272196 |
| 0,615741015 | 8,59E-04    | 0,015785961 |
| 0,615676533 | 7,71E-04    | 0,014712821 |
| 0,615561839 | 1,12E-05    | 0,0010264   |
| 0,615310782 | 6,20E-05    | 0,00296404  |
| 0,615115222 | 2,91E-05    | 0,001866567 |
| 0,615114693 | 2,61E-04    | 0,007443233 |
| 0,615002643 | 0,002460663 | 0,030918979 |
| 0,614792812 | 0,003888955 | 0,041284469 |
| 0,614705603 | 1,09E-06    | 2,71E-04    |
| 0,614024313 | 2,39E-06    | 4,15E-04    |
| 0,613938161 | 4,44E-05    | 0,002392073 |
| 0,613918076 | 8,03E-04    | 0,015100538 |
| 0,613596723 | 4,35E-04    | 0,010245115 |
| 0,61352167  | 0,002406882 | 0,030475314 |
| 0,61259778  | 3,92E-05    | 0,002229831 |
| 0,612576638 | 2,82E-04    | 0,007759204 |
| 0,612164905 | 0,00280152  | 0,033582054 |
| 0,612125793 | 6,02E-07    | 2,08E-04    |
| 0,61190222  | 0,002542115 | 0,031549285 |
| 0,611810254 | 3,35E-05    | 0,001998978 |
| 0,611664905 | 6,29E-04    | 0,012908933 |
| 0,611060782 | 1,59E-05    | 0,001271059 |
| 0,610868393 | 0,002064548 | 0,027451704 |
| 0,610556025 | 0,001847373 | 0,025492144 |
| 0,610342495 | 6,86E-04    | 0,013664343 |
| 0,61029334  | 4,00E-06    | 5,73E-04    |
| 0,610182347 | 8,40E-05    | 0,003548585 |
| 0,609585624 | 1,51E-05    | 0,001233839 |
| 0,6095      | 0,001006316 | 0,01754809  |

# Supplementary\_table\_S2

|             |             |             |
|-------------|-------------|-------------|
| 0,609494186 | 0,001080415 | 0,018469462 |
| 0,609224101 | 3,10E-05    | 0,001926224 |
| 0,609063953 | 0,00240252  | 0,030437391 |
| 0,608735201 | 0,001629806 | 0,023647584 |
| 0,608317125 | 1,67E-05    | 0,001301871 |
| 0,608245243 | 6,48E-04    | 0,013175081 |
| 0,607845666 | 0,00119578  | 0,019619371 |
| 0,607845137 | 2,71E-08    | 5,25E-05    |
| 0,607454017 | 1,54E-04    | 0,005306474 |
| 0,607118393 | 0,002754238 | 0,03315805  |
| 0,60671723  | 8,75E-04    | 0,016007755 |
| 0,606192918 | 8,31E-04    | 0,015417975 |
| 0,605695032 | 2,37E-04    | 0,006954732 |
| 0,605651691 | 1,54E-04    | 0,005316662 |
| 0,605641121 | 3,85E-06    | 5,58E-04    |
| 0,605615222 | 0,002203235 | 0,028736201 |
| 0,60506871  | 9,90E-04    | 0,017368606 |
| 0,604873679 | 6,88E-04    | 0,013684083 |
| 0,604610465 | 3,93E-06    | 5,64E-04    |
| 0,604438689 | 7,47E-05    | 0,003306721 |
| 0,604125264 | 4,14E-05    | 0,002295678 |
| 0,603389535 | 9,17E-04    | 0,016572533 |
| 0,603330867 | 1,64E-04    | 0,005488906 |
| 0,602877907 | 5,44E-05    | 0,002687277 |
| 0,602824524 | 5,72E-06    | 7,12E-04    |
| 0,602726216 | 0,003337809 | 0,037592756 |
| 0,60244186  | 2,21E-06    | 3,97E-04    |
| 0,602299154 | 0,001194109 | 0,019605742 |
| 0,601936047 | 3,15E-04    | 0,008303463 |
| 0,601859937 | 1,80E-05    | 0,001380111 |
| 0,6017537   | 7,24E-04    | 0,014137988 |
| 0,601519027 | 5,27E-04    | 0,011631738 |
| 0,601491015 | 0,002154873 | 0,028323008 |
| 0,601391121 | 1,10E-05    | 0,001016299 |
| 0,601218816 | 1,70E-04    | 0,00559584  |
| 0,600743129 | 0,001604043 | 0,023426388 |
| 0,600730444 | 3,32E-04    | 0,008546688 |
| 0,600674419 | 0,001262756 | 0,020269621 |
| 0,600484144 | 5,29E-06    | 6,77E-04    |
| 0,600468288 | 0,00215892  | 0,028346591 |
| 0,600446617 | 1,50E-04    | 0,005234605 |
| 0,600075581 | 9,42E-04    | 0,016843106 |
| 0,59987315  | 0,002645193 | 0,032396337 |
| 0,599750529 | 2,10E-05    | 0,001543341 |
| 0,599737844 | 0,004462727 | 0,044822484 |
| 0,599356765 | 1,75E-05    | 0,001346581 |
| 0,599324524 | 0,001028926 | 0,017785208 |
| 0,599161205 | 5,86E-05    | 0,00283931  |
| 0,599121564 | 1,29E-05    | 0,001122176 |
| 0,599117336 | 0,003572274 | 0,039096655 |
| 0,598741543 | 1,91E-06    | 3,69E-04    |
| 0,598595666 | 5,56E-04    | 0,012019926 |
| 0,598434461 | 0,003299061 | 0,037392715 |

# Supplementary\_table\_S2

|             |             |             |
|-------------|-------------|-------------|
| 0,597973044 | 3,94E-04    | 0,009668762 |
| 0,597887949 | 0,001578563 | 0,023206436 |
| 0,597812896 | 8,49E-05    | 0,003578629 |
| 0,597715645 | 2,50E-04    | 0,007214493 |
| 0,597041755 | 0,0016357   | 0,023702212 |
| 0,596306025 | 2,23E-04    | 0,006680424 |
| 0,596289641 | 0,001247933 | 0,020125971 |
| 0,595631078 | 1,05E-04    | 0,004105519 |
| 0,595468288 | 0,00466396  | 0,045932222 |
| 0,595466702 | 6,56E-05    | 0,003057668 |
| 0,595358879 | 4,21E-04    | 0,010043152 |
| 0,59526797  | 5,63E-04    | 0,012069922 |
| 0,59519926  | 4,54E-05    | 0,002415327 |
| 0,595112051 | 0,0013683   | 0,021273836 |
| 0,595084567 | 7,71E-06    | 8,29E-04    |
| 0,594922833 | 2,59E-04    | 0,007409751 |
| 0,594921247 | 0,004174326 | 0,043320001 |
| 0,594807082 | 1,83E-04    | 0,005859569 |
| 0,594646934 | 7,50E-04    | 0,014454311 |
| 0,594359408 | 0,003636797 | 0,039511585 |
| 0,594321353 | 0,004197245 | 0,043455503 |
| 0,594038055 | 2,91E-04    | 0,007873587 |
| 0,59396723  | 2,39E-05    | 0,001656458 |
| 0,593964059 | 2,10E-05    | 0,001543341 |
| 0,593909619 | 3,16E-05    | 0,001949906 |
| 0,593789112 | 0,004770303 | 0,046588111 |
| 0,593680761 | 0,003633386 | 0,039511585 |
| 0,593665433 | 1,47E-04    | 0,005133223 |
| 0,593552854 | 7,07E-04    | 0,013892214 |
| 0,593426533 | 1,24E-06    | 3,00E-04    |
| 0,593196089 | 3,28E-05    | 0,001980465 |
| 0,593192918 | 7,15E-06    | 8,02E-04    |
| 0,592146406 | 0,001714667 | 0,024409086 |
| 0,592131078 | 6,26E-07    | 2,13E-04    |
| 0,591734144 | 1,25E-04    | 0,004630441 |
| 0,590863108 | 0,001192679 | 0,019596709 |
| 0,590710359 | 0,003076535 | 0,035627242 |
| 0,590502114 | 6,93E-04    | 0,013724255 |
| 0,590217759 | 0,002507999 | 0,031300605 |
| 0,5900037   | 7,48E-05    | 0,003306721 |
| 0,589717759 | 3,56E-05    | 0,002082716 |
| 0,58963055  | 5,12E-05    | 0,002587139 |
| 0,589472516 | 3,45E-04    | 0,008787377 |
| 0,589405391 | 7,36E-04    | 0,01428767  |
| 0,589364693 | 0,004325204 | 0,044057139 |
| 0,589036469 | 1,75E-06    | 3,58E-04    |
| 0,588770613 | 8,40E-05    | 0,003548585 |
| 0,588627378 | 2,90E-08    | 5,38E-05    |
| 0,588575581 | 0,001620727 | 0,023584994 |
| 0,588136364 | 1,10E-04    | 0,004213886 |
| 0,588087738 | 1,07E-05    | 0,001003929 |
| 0,588049154 | 2,73E-04    | 0,007630608 |
| 0,587957188 | 0,003467539 | 0,038466303 |

# Supplementary\_table\_S2

|             |             |             |
|-------------|-------------|-------------|
| 0,587938161 | 3,14E-04    | 0,008302485 |
| 0,587876321 | 4,24E-04    | 0,010084929 |
| 0,587852537 | 0,004489321 | 0,044957809 |
| 0,587486258 | 1,62E-05    | 0,001282689 |
| 0,587167019 | 1,43E-04    | 0,005059531 |
| 0,586713531 | 5,38E-04    | 0,011786355 |
| 0,586279598 | 2,86E-07    | 1,26E-04    |
| 0,585513742 | 0,004853002 | 0,047116849 |
| 0,585254757 | 3,01E-04    | 0,008040175 |
| 0,585086681 | 9,91E-07    | 2,61E-04    |
| 0,58502167  | 7,10E-05    | 0,003200508 |
| 0,58493129  | 0,001138865 | 0,019042637 |
| 0,584591438 | 4,26E-04    | 0,010096928 |
| 0,58452537  | 1,15E-04    | 0,004360192 |
| 0,584524313 | 4,28E-04    | 0,010139572 |
| 0,584226744 | 0,002747562 | 0,033122441 |
| 0,584214059 | 1,58E-04    | 0,00538196  |
| 0,584159091 | 6,15E-04    | 0,012697223 |
| 0,584126321 | 4,52E-04    | 0,010471704 |
| 0,584001586 | 7,31E-06    | 8,12E-04    |
| 0,583877378 | 0,002709418 | 0,03290303  |
| 0,583530655 | 3,43E-05    | 0,002037783 |
| 0,58342019  | 2,43E-05    | 0,001671314 |
| 0,583289641 | 4,31E-05    | 0,002354203 |
| 0,583211416 | 0,005205779 | 0,049502454 |
| 0,583118393 | 0,004131848 | 0,043102821 |
| 0,582000529 | 6,85E-05    | 0,003138365 |
| 0,581510571 | 0,004016133 | 0,042281876 |
| 0,580909091 | 3,59E-04    | 0,009017286 |
| 0,580772727 | 8,98E-05    | 0,003688279 |
| 0,580226216 | 0,003431603 | 0,038281319 |
| 0,580060254 | 0,001276894 | 0,020401    |
| 0,57990592  | 6,51E-05    | 0,003044664 |
| 0,579841438 | 1,28E-05    | 0,001116061 |
| 0,579533298 | 3,09E-05    | 0,001926224 |
| 0,579464059 | 6,72E-04    | 0,01349285  |
| 0,579103594 | 5,43E-06    | 6,87E-04    |
| 0,579094609 | 4,58E-05    | 0,002426352 |
| 0,579033298 | 3,57E-05    | 0,002082716 |
| 0,578972516 | 0,003763211 | 0,040343791 |
| 0,578810782 | 8,24E-04    | 0,015357341 |
| 0,578439746 | 0,001723362 | 0,024463167 |
| 0,578276427 | 9,52E-04    | 0,016928334 |
| 0,578147992 | 0,001243021 | 0,020075829 |
| 0,577890592 | 2,28E-05    | 0,001605602 |
| 0,577864693 | 8,28E-06    | 8,56E-04    |
| 0,577846723 | 1,29E-04    | 0,004734028 |
| 0,57751797  | 5,36E-05    | 0,002661235 |
| 0,577441332 | 2,14E-05    | 0,001558917 |
| 0,576797569 | 5,82E-04    | 0,012279129 |
| 0,576758985 | 0,003080586 | 0,035660507 |
| 0,576692918 | 0,003512531 | 0,038661921 |
| 0,57655444  | 0,001593995 | 0,023333191 |

# Supplementary\_table\_S2

|             |             |             |
|-------------|-------------|-------------|
| 0,576424419 | 4,34E-06    | 5,94E-04    |
| 0,576286998 | 7,71E-06    | 8,29E-04    |
| 0,576144292 | 0,004083322 | 0,042776926 |
| 0,575814482 | 3,59E-05    | 0,002087579 |
| 0,575763742 | 3,36E-04    | 0,008630289 |
| 0,575529598 | 7,25E-04    | 0,014150598 |
| 0,575518499 | 3,57E-04    | 0,00899617  |
| 0,575226216 | 0,002971592 | 0,034879204 |
| 0,574928647 | 0,001560956 | 0,02303227  |
| 0,574230444 | 6,00E-06    | 7,30E-04    |
| 0,574216702 | 1,83E-04    | 0,005859569 |
| 0,573700846 | 1,41E-04    | 0,005004974 |
| 0,573311311 | 0,002805356 | 0,033591879 |
| 0,573267442 | 4,99E-05    | 0,00255176  |
| 0,572865751 | 7,21E-05    | 0,003228251 |
| 0,572723573 | 6,13E-04    | 0,012669606 |
| 0,572563425 | 0,001103811 | 0,018761291 |
| 0,572561839 | 3,27E-04    | 0,008497118 |
| 0,572497886 | 0,001722555 | 0,024459517 |
| 0,572219873 | 4,43E-04    | 0,01031814  |
| 0,571942389 | 0,001261265 | 0,020260293 |
| 0,571643763 | 1,07E-05    | 0,001003929 |
| 0,571639535 | 3,40E-06    | 5,14E-04    |
| 0,571187632 | 8,07E-04    | 0,015146987 |
| 0,571015856 | 1,07E-05    | 0,001003929 |
| 0,570346195 | 1,33E-06    | 3,11E-04    |
| 0,570090381 | 8,04E-05    | 0,003468463 |
| 0,56940222  | 7,85E-04    | 0,01487155  |
| 0,569269556 | 0,004701687 | 0,046201618 |
| 0,56923203  | 2,84E-04    | 0,007759204 |
| 0,569128436 | 0,003437776 | 0,038291557 |
| 0,569110994 | 7,80E-05    | 0,00339366  |
| 0,568385835 | 4,39E-05    | 0,00237714  |
| 0,568361522 | 0,001091148 | 0,01857955  |
| 0,568085624 | 0,00373699  | 0,040191506 |
| 0,567887949 | 7,92E-05    | 0,003431754 |
| 0,567579281 | 0,00160677  | 0,023448548 |
| 0,567370507 | 6,13E-04    | 0,01267083  |
| 0,567107822 | 0,002717256 | 0,032968933 |
| 0,566935518 | 3,58E-04    | 0,009013238 |
| 0,566932347 | 9,52E-05    | 0,003860366 |
| 0,56665592  | 9,87E-05    | 0,003963071 |
| 0,566015328 | 0,004957557 | 0,047891869 |
| 0,565816596 | 3,48E-05    | 0,002050321 |
| 0,565642706 | 0,004785433 | 0,046684697 |
| 0,565436047 | 1,80E-06    | 3,63E-04    |
| 0,565412791 | 8,26E-05    | 0,003512233 |
| 0,56532611  | 7,78E-04    | 0,01478302  |
| 0,565325053 | 5,60E-04    | 0,012055378 |
| 0,565282241 | 1,59E-04    | 0,005386936 |
| 0,565151163 | 2,60E-04    | 0,007431766 |
| 0,564943975 | 0,00144749  | 0,022032446 |
| 0,564497886 | 5,80E-05    | 0,002820937 |



# Supplementary\_table\_S2

|             |             |             |
|-------------|-------------|-------------|
| 0,564403277 | 3,14E-04    | 0,008303463 |
| 0,563968816 | 8,27E-04    | 0,01538217  |
| 0,563928118 | 0,003565425 | 0,03905048  |
| 0,563817125 | 0,001085151 | 0,018512815 |
| 0,563644292 | 7,01E-05    | 0,003179541 |
| 0,563636892 | 0,002343182 | 0,029921995 |
| 0,563609408 | 0,001920455 | 0,026136488 |
| 0,563147992 | 0,003003262 | 0,035112418 |
| 0,563048626 | 2,51E-05    | 0,001699294 |
| 0,56265222  | 0,003502201 | 0,038614365 |
| 0,562613108 | 0,001242637 | 0,020075829 |
| 0,561966173 | 2,46E-04    | 0,007151821 |
| 0,561794926 | 0,001471899 | 0,022217642 |
| 0,56160148  | 0,003656278 | 0,039645877 |
| 0,561485201 | 0,001193216 | 0,019598301 |
| 0,561455074 | 2,83E-04    | 0,007759204 |
| 0,561381078 | 8,29E-04    | 0,015390494 |
| 0,561304968 | 3,58E-04    | 0,009013238 |
| 0,560968816 | 0,003036991 | 0,035404272 |
| 0,560915433 | 4,71E-05    | 0,002458825 |
| 0,560896406 | 1,87E-06    | 3,66E-04    |
| 0,560292283 | 4,88E-06    | 6,43E-04    |
| 0,560200317 | 3,05E-05    | 0,001915156 |
| 0,560172304 | 5,45E-04    | 0,011865083 |
| 0,559957188 | 0,001559616 | 0,023026699 |
| 0,559692918 | 5,58E-08    | 5,89E-05    |
| 0,559535941 | 0,004311769 | 0,044050124 |
| 0,559001586 | 2,63E-04    | 0,007462687 |
| 0,558500529 | 3,96E-04    | 0,009682712 |
| 0,558104123 | 3,38E-06    | 5,13E-04    |
| 0,55798203  | 0,002703107 | 0,032844303 |
| 0,557968816 | 0,002475793 | 0,031012437 |
| 0,557258457 | 1,07E-04    | 0,004151615 |
| 0,557113108 | 0,001219402 | 0,019839004 |
| 0,556635835 | 7,29E-07    | 2,30E-04    |
| 0,55642389  | 3,26E-06    | 5,07E-04    |
| 0,556397992 | 0,001186515 | 0,019538685 |
| 0,556350951 | 3,39E-05    | 0,002018935 |
| 0,556112579 | 0,001509289 | 0,022592118 |
| 0,555774841 | 3,98E-05    | 0,002254591 |
| 0,555348309 | 7,58E-04    | 0,014543309 |
| 0,55532981  | 0,003201721 | 0,036577959 |
| 0,555008985 | 3,56E-05    | 0,002082716 |
| 0,554906977 | 6,04E-04    | 0,012577491 |
| 0,554839852 | 0,001208388 | 0,019738337 |
| 0,554684461 | 5,66E-04    | 0,012110917 |
| 0,554531184 | 0,003976411 | 0,041962865 |
| 0,554297569 | 3,28E-04    | 0,008498288 |
| 0,554184461 | 3,31E-04    | 0,008539003 |
| 0,554063953 | 4,12E-04    | 0,009923209 |
| 0,553887421 | 5,35E-05    | 0,002661235 |
| 0,553692389 | 0,003863848 | 0,041091865 |
| 0,5532426   | 2,15E-05    | 0,00156106  |

# Supplementary\_table\_S2

|             |             |             |
|-------------|-------------|-------------|
| 0,552490486 | 1,34E-05    | 0,001153897 |
| 0,552234672 | 0,002510007 | 0,031300605 |
| 0,55194556  | 3,26E-05    | 0,00197257  |
| 0,551894292 | 2,15E-04    | 0,006519425 |
| 0,551400106 | 0,001972016 | 0,026586404 |
| 0,55117759  | 0,003103275 | 0,035792929 |
| 0,55110518  | 1,90E-04    | 0,006020961 |
| 0,550993129 | 7,83E-07    | 2,31E-04    |
| 0,550818182 | 9,33E-04    | 0,016780237 |
| 0,550608351 | 7,42E-05    | 0,003290333 |
| 0,550327696 | 0,001268837 | 0,020319038 |
| 0,549735201 | 2,77E-04    | 0,007698371 |
| 0,54965592  | 0,001629359 | 0,023647584 |
| 0,549628436 | 9,61E-04    | 0,017026974 |
| 0,549524841 | 1,59E-04    | 0,005386936 |
| 0,549302326 | 7,78E-04    | 0,01478302  |
| 0,54926797  | 0,00344713  | 0,038329744 |
| 0,549213002 | 1,26E-04    | 0,004665842 |
| 0,549066068 | 3,27E-05    | 0,00197571  |
| 0,548880021 | 0,003879073 | 0,041204846 |
| 0,54884778  | 9,54E-04    | 0,016952303 |
| 0,548828224 | 7,05E-07    | 2,29E-04    |
| 0,548828224 | 4,61E-05    | 0,002436301 |
| 0,548762156 | 6,59E-04    | 0,013308319 |
| 0,548745772 | 6,04E-04    | 0,012577491 |
| 0,54858351  | 0,001520221 | 0,02270849  |
| 0,548364693 | 9,80E-04    | 0,017256765 |
| 0,548157505 | 1,88E-06    | 3,66E-04    |
| 0,548154863 | 5,25E-05    | 0,002629351 |
| 0,547922833 | 6,99E-04    | 0,013800714 |
| 0,547114693 | 2,16E-05    | 0,001562278 |
| 0,547053383 | 5,61E-04    | 0,012058374 |
| 0,546857822 | 5,11E-05    | 0,002587139 |
| 0,546509514 | 4,90E-08    | 5,81E-05    |
| 0,546035941 | 5,55E-04    | 0,012019926 |
| 0,545910148 | 6,22E-05    | 0,002965203 |
| 0,545784355 | 0,00476019  | 0,046530153 |
| 0,545389535 | 2,32E-05    | 0,001622481 |
| 0,545265856 | 3,43E-04    | 0,008763443 |
| 0,545241015 | 2,73E-05    | 0,001793417 |
| 0,545126321 | 6,52E-06    | 7,62E-04    |
| 0,545049154 | 0,001337435 | 0,020969631 |
| 0,544379493 | 8,11E-08    | 7,86E-05    |
| 0,54432981  | 0,004428649 | 0,044644282 |
| 0,544207717 | 6,39E-05    | 0,003012578 |
| 0,544079281 | 0,001927912 | 0,026189966 |
| 0,543977273 | 5,33E-05    | 0,002654886 |
| 0,54379704  | 3,25E-04    | 0,008477337 |
| 0,543339852 | 0,001164407 | 0,019303069 |
| 0,543178647 | 7,97E-05    | 0,003448841 |
| 0,543137421 | 6,09E-04    | 0,012644217 |
| 0,542979915 | 0,001871684 | 0,025704006 |
| 0,542863636 | 8,33E-05    | 0,003528935 |

# Supplementary\_table\_S2

|             |             |             |
|-------------|-------------|-------------|
| 0,542628964 | 0,00235008  | 0,029984793 |
| 0,54247463  | 0,002662118 | 0,032496956 |
| 0,542345137 | 2,47E-04    | 0,007178612 |
| 0,542137949 | 0,001140974 | 0,019056447 |
| 0,542063425 | 7,77E-05    | 0,003387239 |
| 0,541893763 | 2,53E-05    | 0,001707921 |
| 0,541752643 | 1,13E-04    | 0,00431598  |
| 0,541298097 | 6,44E-05    | 0,003022293 |
| 0,541036998 | 0,00429921  | 0,044022306 |
| 0,540971987 | 1,85E-04    | 0,005918122 |
| 0,540832981 | 1,28E-04    | 0,004723652 |
| 0,54030814  | 0,001439335 | 0,021946324 |
| 0,540225687 | 6,43E-04    | 0,013101756 |
| 0,540134249 | 2,44E-04    | 0,007113591 |
| 0,540122093 | 1,74E-06    | 3,58E-04    |
| 0,540053383 | 7,75E-07    | 2,31E-04    |
| 0,539291226 | 6,06E-04    | 0,012606343 |
| 0,538741543 | 0,005237487 | 0,04962745  |
| 0,538619979 | 0,002628405 | 0,032271127 |
| 0,538356237 | 6,21E-05    | 0,00296404  |
| 0,538156977 | 5,66E-04    | 0,012117436 |
| 0,538080338 | 0,00251982  | 0,031374489 |
| 0,538077167 | 4,77E-04    | 0,010845514 |
| 0,538019556 | 1,04E-04    | 0,004103487 |
| 0,537956131 | 8,71E-04    | 0,015946919 |
| 0,53782611  | 0,001790359 | 0,025023466 |
| 0,537401163 | 1,56E-04    | 0,005322108 |
| 0,537327167 | 1,20E-04    | 0,004520192 |
| 0,537096195 | 6,58E-05    | 0,003063878 |
| 0,537063953 | 0,001823391 | 0,025302535 |
| 0,536905391 | 0,001893607 | 0,02590398  |
| 0,536796512 | 2,85E-04    | 0,007759204 |
| 0,536724101 | 0,002211241 | 0,028794261 |
| 0,536642178 | 9,64E-06    | 9,42E-04    |
| 0,536546512 | 1,98E-04    | 0,006169312 |
| 0,536372622 | 1,62E-04    | 0,005444242 |
| 0,536353066 | 0,001404583 | 0,021574398 |
| 0,536161205 | 0,001849639 | 0,025500784 |
| 0,535956131 | 0,003768105 | 0,040370532 |
| 0,535924947 | 1,60E-07    | 1,01E-04    |
| 0,535724101 | 8,58E-07    | 2,43E-04    |
| 0,535624207 | 1,36E-05    | 0,001163819 |
| 0,535348309 | 0,003744259 | 0,040227758 |
| 0,535316068 | 1,48E-05    | 0,0012271   |
| 0,535227273 | 3,12E-05    | 0,001929977 |
| 0,535039112 | 0,004574549 | 0,045521965 |
| 0,534994715 | 2,55E-04    | 0,007331463 |
| 0,534692389 | 8,66E-05    | 0,003620006 |
| 0,534623679 | 4,99E-04    | 0,011229795 |
| 0,533718816 | 2,47E-05    | 0,001685141 |
| 0,533590909 | 1,37E-05    | 0,001165126 |
| 0,533436575 | 0,001191798 | 0,019596692 |
| 0,533399577 | 0,001804843 | 0,025178493 |

# Supplementary\_table\_S2

|             |             |             |
|-------------|-------------|-------------|
| 0,53322093  | 0,001535347 | 0,02279192  |
| 0,533104651 | 4,43E-04    | 0,01031814  |
| 0,532484672 | 4,48E-04    | 0,010398045 |
| 0,532093023 | 1,32E-04    | 0,004810941 |
| 0,53197833  | 7,76E-04    | 0,014772651 |
| 0,531723573 | 0,004581424 | 0,045521965 |
| 0,531605708 | 5,45E-04    | 0,011865083 |
| 0,531284884 | 0,004953239 | 0,047881311 |
| 0,531053911 | 0,003029291 | 0,035342259 |
| 0,530943975 | 1,64E-05    | 0,001289977 |
| 0,530913848 | 1,72E-04    | 0,00564288  |
| 0,530798626 | 9,74E-04    | 0,017174477 |
| 0,53039852  | 2,35E-05    | 0,001631936 |
| 0,530393235 | 6,35E-04    | 0,013003699 |
| 0,530374207 | 0,001593873 | 0,023333191 |
| 0,530368922 | 0,001787956 | 0,025021877 |
| 0,530242072 | 0,001364287 | 0,021226268 |
| 0,530233087 | 0,001675916 | 0,023991307 |
| 0,530093552 | 6,72E-04    | 0,013489501 |
| 0,529958774 | 6,93E-04    | 0,013724255 |
| 0,529903277 | 0,001127044 | 0,0189374   |
| 0,529635835 | 1,02E-04    | 0,004052636 |
| 0,529625264 | 8,93E-04    | 0,016211432 |
| 0,52957241  | 1,02E-04    | 0,004052636 |
| 0,529275899 | 0,001807166 | 0,02518723  |
| 0,529225687 | 0,001749566 | 0,02470916  |
| 0,529153805 | 1,99E-04    | 0,006191578 |
| 0,528915433 | 0,004324344 | 0,044057139 |
| 0,528791755 | 0,002515912 | 0,031347911 |
| 0,528651691 | 2,02E-04    | 0,006264766 |
| 0,528586681 | 0,002360473 | 0,030058576 |
| 0,528450317 | 0,004349769 | 0,044216367 |
| 0,528338795 | 7,77E-04    | 0,014781399 |
| 0,52831871  | 7,33E-04    | 0,014242035 |
| 0,528002643 | 2,68E-04    | 0,007567586 |
| 0,527857822 | 0,001535528 | 0,02279192  |
| 0,527828753 | 1,80E-04    | 0,005807147 |
| 0,527675476 | 1,01E-05    | 9,66E-04    |
| 0,527619979 | 3,73E-07    | 1,54E-04    |
| 0,527375264 | 6,36E-04    | 0,013014301 |
| 0,527291755 | 0,002926261 | 0,034593257 |
| 0,526811311 | 0,002967298 | 0,034865552 |
| 0,526653277 | 0,003321176 | 0,037481244 |
| 0,526647463 | 9,70E-04    | 0,017116793 |
| 0,526638478 | 0,00226173  | 0,029273677 |
| 0,526408034 | 0,002818171 | 0,033709073 |
| 0,526008985 | 2,25E-05    | 0,001599003 |
| 0,525839323 | 1,26E-05    | 0,001108953 |
| 0,525762685 | 6,77E-04    | 0,013526406 |
| 0,525316596 | 7,61E-04    | 0,014591223 |
| 0,525156448 | 0,001807847 | 0,025188851 |
| 0,523483615 | 2,62E-04    | 0,007462687 |
| 0,523030655 | 2,24E-05    | 0,001599003 |

# Supplementary\_table\_S2

|             |             |             |
|-------------|-------------|-------------|
| 0,522915433 | 0,001197966 | 0,019647354 |
| 0,522788055 | 0,001152039 | 0,019176536 |
| 0,52264482  | 0,00263352  | 0,032316118 |
| 0,522567653 | 0,004199159 | 0,043458956 |
| 0,522484672 | 4,36E-04    | 0,010246217 |
| 0,522277484 | 4,68E-05    | 0,002454888 |
| 0,522223573 | 1,38E-04    | 0,004951133 |
| 0,52219926  | 3,19E-05    | 0,001953832 |
| 0,522154863 | 5,60E-05    | 0,002758858 |
| 0,521748943 | 4,06E-05    | 0,002284185 |
| 0,521328224 | 3,76E-04    | 0,009305519 |
| 0,521302326 | 0,002820309 | 0,033717389 |
| 0,521282241 | 1,93E-04    | 0,006057821 |
| 0,521263214 | 9,89E-06    | 9,56E-04    |
| 0,52120296  | 8,79E-04    | 0,016047938 |
| 0,521054968 | 1,46E-04    | 0,005110857 |
| 0,520858351 | 0,001657624 | 0,023842872 |
| 0,520680761 | 0,004604157 | 0,045625713 |
| 0,520592495 | 6,76E-04    | 0,013516663 |
| 0,520368393 | 0,001106572 | 0,018771646 |
| 0,520320825 | 0,001188997 | 0,019565568 |
| 0,520239958 | 0,001037654 | 0,017894407 |
| 0,520180761 | 2,59E-04    | 0,007418231 |
| 0,519424419 | 8,66E-05    | 0,003620006 |
| 0,518785412 | 1,66E-05    | 0,001297315 |
| 0,518610465 | 9,25E-06    | 9,14E-04    |
| 0,517980444 | 4,48E-05    | 0,002399541 |
| 0,517961416 | 4,61E-05    | 0,002436301 |
| 0,517832452 | 8,45E-05    | 0,003562854 |
| 0,517602537 | 0,003287793 | 0,037321978 |
| 0,517571882 | 0,001106956 | 0,018771646 |
| 0,517431818 | 0,002750275 | 0,033139581 |
| 0,517172833 | 0,004830791 | 0,047013934 |
| 0,51688055  | 1,66E-04    | 0,005525897 |
| 0,51672093  | 7,33E-04    | 0,014242035 |
| 0,516628436 | 0,002053411 | 0,027344442 |
| 0,516599894 | 0,002502223 | 0,031247278 |
| 0,516413848 | 9,47E-04    | 0,0168771   |
| 0,516176533 | 2,72E-05    | 0,001791338 |
| 0,515765328 | 0,004454979 | 0,044763926 |
| 0,515765328 | 3,65E-05    | 0,002106138 |
| 0,515708245 | 0,003783617 | 0,04044575  |
| 0,515609408 | 1,05E-04    | 0,004112788 |
| 0,51502167  | 6,30E-04    | 0,012925968 |
| 0,514834567 | 0,001249844 | 0,020141666 |
| 0,514592495 | 0,002459983 | 0,030918979 |
| 0,51420296  | 3,84E-05    | 0,002192026 |
| 0,51407981  | 0,002614119 | 0,032140027 |
| 0,513650106 | 8,02E-04    | 0,015080427 |
| 0,513006871 | 0,00208108  | 0,027630285 |
| 0,512830338 | 0,00228602  | 0,029472785 |
| 0,512735729 | 0,004836187 | 0,047028192 |
| 0,512715116 | 6,10E-04    | 0,012648831 |

# Supplementary\_table\_S2

|             |             |             |
|-------------|-------------|-------------|
| 0,512076638 | 4,17E-05    | 0,002301591 |
| 0,511944503 | 0,003830663 | 0,040830019 |
| 0,51170296  | 0,003693478 | 0,039942288 |
| 0,511466702 | 8,55E-06    | 8,69E-04    |
| 0,511343552 | 0,005004031 | 0,048204918 |
| 0,511332981 | 0,003997042 | 0,042112182 |
| 0,511275899 | 8,83E-04    | 0,016091292 |
| 0,511183932 | 2,47E-04    | 0,007178612 |
| 0,51118129  | 8,85E-04    | 0,016119037 |
| 0,511122622 | 0,001863808 | 0,025623914 |
| 0,510963002 | 6,59E-05    | 0,003063878 |
| 0,510819239 | 6,44E-04    | 0,013101756 |
| 0,510690803 | 0,00230648  | 0,029667872 |
| 0,510647992 | 4,17E-04    | 0,009989073 |
| 0,510412791 | 0,001360522 | 0,021217735 |
| 0,510328224 | 2,89E-05    | 0,001866567 |
| 0,510262156 | 6,39E-05    | 0,003012578 |
| 0,509692389 | 3,76E-04    | 0,009305519 |
| 0,509536998 | 6,11E-04    | 0,012648831 |
| 0,50944186  | 7,83E-06    | 8,29E-04    |
| 0,509402748 | 0,002905346 | 0,034409927 |
| 0,50908351  | 7,99E-04    | 0,015038423 |
| 0,508809725 | 1,82E-06    | 3,63E-04    |
| 0,508777484 | 5,61E-06    | 7,01E-04    |
| 0,508675476 | 0,004653487 | 0,045879795 |
| 0,50867019  | 0,004928599 | 0,047725977 |
| 0,508650106 | 2,82E-04    | 0,007759204 |
| 0,508465116 | 5,56E-04    | 0,012019926 |
| 0,50827907  | 0,00226384  | 0,029284787 |
| 0,508243129 | 3,44E-04    | 0,008779164 |
| 0,508219345 | 1,64E-04    | 0,005488906 |
| 0,508206131 | 0,000283411 | 0,007759204 |
| 0,508192918 | 1,09E-04    | 0,004200837 |
| 0,508035412 | 0,004871301 | 0,047273906 |
| 0,507819767 | 0,002092461 | 0,027698834 |
| 0,507679175 | 0,004121109 | 0,043051284 |
| 0,507251586 | 6,67E-05    | 0,003086127 |
| 0,507144292 | 0,002293959 | 0,02955694  |
| 0,506849894 | 1,33E-04    | 0,00482787  |
| 0,506516385 | 0,003423099 | 0,038253518 |
| 0,506391121 | 1,34E-04    | 0,004860744 |
| 0,506365222 | 0,003483186 | 0,038527525 |
| 0,506044397 | 2,75E-04    | 0,007651372 |
| 0,505972516 | 6,02E-05    | 0,002904001 |
| 0,50589482  | 2,16E-05    | 0,001562654 |
| 0,505803911 | 2,69E-04    | 0,007582082 |
| 0,505626321 | 0,00171941  | 0,02445007  |
| 0,50527907  | 0,004811376 | 0,046896705 |
| 0,504885835 | 1,68E-04    | 0,005570375 |
| 0,504529598 | 0,002976896 | 0,034904679 |
| 0,503633721 | 0,001877571 | 0,025754265 |
| 0,503509514 | 0,004378291 | 0,044351479 |
| 0,503156448 | 0,001026673 | 0,017760055 |

# Supplementary\_table\_S2

|             |             |             |
|-------------|-------------|-------------|
| 0,503023256 | 4,72E-04    | 0,010752547 |
| 0,502746829 | 0,00182193  | 0,025290141 |
| 0,502506871 | 3,14E-04    | 0,008303463 |
| 0,502439746 | 6,36E-04    | 0,013016024 |
| 0,502348309 | 2,61E-04    | 0,007443233 |
| 0,501676004 | 1,03E-06    | 2,66E-04    |
| 0,501671247 | 2,09E-04    | 0,006402118 |
| 0,501550211 | 2,72E-06    | 4,53E-04    |
| 0,501452431 | 1,89E-04    | 0,006012071 |
| 0,50127537  | 7,10E-04    | 0,013932253 |
| 0,501223573 | 0,002050943 | 0,027319742 |
| 0,501144292 | 5,11E-05    | 0,002587139 |
| 0,500995243 | 0,002289183 | 0,029505031 |
| 0,50082981  | 0,0019782   | 0,026629479 |
| 0,500785412 | 0,001342965 | 0,02103412  |
| 0,500317653 | 0,001109787 | 0,018793982 |
| 0,500285941 | 0,001269028 | 0,020319038 |
| 0,499980973 | 0,002017269 | 0,026951785 |
| 0,499944503 | 3,50E-04    | 0,008889481 |
| 0,499935518 | 2,16E-04    | 0,006532318 |
| 0,499932875 | 0,004399353 | 0,044486892 |
| 0,499928118 | 3,60E-05    | 0,002087579 |
| 0,499899577 | 0,002163802 | 0,028365037 |
| 0,499831924 | 5,71E-04    | 0,012176757 |
| 0,499571353 | 4,15E-05    | 0,002295678 |
| 0,499512685 | 1,40E-04    | 0,004993368 |
| 0,499451374 | 0,001068314 | 0,018302682 |
| 0,499353594 | 0,002634848 | 0,032323515 |
| 0,499274313 | 0,00177238  | 0,024905017 |
| 0,499190275 | 0,002132619 | 0,028096836 |
| 0,499176533 | 0,004881279 | 0,047350108 |
| 0,499128964 | 2,92E-05    | 0,001866567 |
| 0,499036469 | 0,003448031 | 0,038330193 |
| 0,498910677 | 1,27E-04    | 0,004691206 |
| 0,498286469 | 0,001199285 | 0,019652056 |
| 0,498131607 | 1,52E-04    | 0,005270661 |
| 0,498099894 | 0,004526446 | 0,04517724  |
| 0,498011099 | 0,003443353 | 0,038326015 |
| 0,497787526 | 0,003225387 | 0,036754061 |
| 0,497723573 | 3,64E-04    | 0,009109573 |
| 0,497624207 | 3,15E-04    | 0,008303463 |
| 0,496913848 | 1,56E-04    | 0,005322108 |
| 0,496912791 | 5,82E-04    | 0,012283556 |
| 0,49621723  | 0,001650977 | 0,023776637 |
| 0,496133721 | 9,92E-04    | 0,017380519 |
| 0,495113636 | 0,001531372 | 0,022768164 |
| 0,494732558 | 0,003761408 | 0,040343791 |
| 0,494529598 | 0,001034831 | 0,017852642 |
| 0,494165962 | 0,001789856 | 0,025023466 |
| 0,49398203  | 1,39E-05    | 0,001176188 |
| 0,493803911 | 4,61E-04    | 0,010594032 |
| 0,493694503 | 3,15E-04    | 0,008303463 |
| 0,493635307 | 5,97E-04    | 0,012482124 |

# Supplementary\_table\_S2

|             |             |             |
|-------------|-------------|-------------|
| 0,493375264 | 0,003408757 | 0,038160254 |
| 0,493050211 | 7,98E-05    | 0,003448841 |
| 0,492907505 | 0,00290268  | 0,034406175 |
| 0,492455074 | 0,003736659 | 0,040191506 |
| 0,492433404 | 0,001593497 | 0,023333191 |
| 0,492310254 | 8,49E-04    | 0,015658245 |
| 0,49213055  | 0,001900075 | 0,025945864 |
| 0,491424947 | 0,004058218 | 0,042624209 |
| 0,49127907  | 0,004074293 | 0,042722531 |
| 0,4912537   | 0,002520158 | 0,031374489 |
| 0,490751586 | 9,44E-04    | 0,01685263  |
| 0,490612051 | 0,003857813 | 0,041061512 |
| 0,490550211 | 0,001236355 | 0,020027944 |
| 0,490327696 | 6,94E-07    | 2,29E-04    |
| 0,49023203  | 7,54E-04    | 0,014518574 |
| 0,490147992 | 0,001967691 | 0,026560245 |
| 0,490095666 | 2,07E-04    | 0,006363819 |
| 0,489985201 | 7,17E-04    | 0,014043587 |
| 0,489650634 | 7,71E-04    | 0,014712821 |
| 0,489587209 | 1,56E-04    | 0,005322108 |
| 0,48938055  | 9,84E-05    | 0,003958507 |
| 0,48927167  | 0,001545226 | 0,022873018 |
| 0,489058668 | 0,003310093 | 0,037458868 |
| 0,48905444  | 0,00363666  | 0,039511585 |
| 0,488847252 | 0,001132896 | 0,018991869 |
| 0,488751057 | 3,58E-05    | 0,002087579 |
| 0,488466702 | 5,07E-04    | 0,011347845 |
| 0,488364165 | 0,001574907 | 0,023179586 |
| 0,488235729 | 2,90E-05    | 0,001866567 |
| 0,4879963   | 6,46E-06    | 7,62E-04    |
| 0,487986786 | 0,001045997 | 0,018010392 |
| 0,487827696 | 5,50E-04    | 0,01196545  |
| 0,487610994 | 1,72E-04    | 0,005654961 |
| 0,487425476 | 0,003408503 | 0,038160254 |
| 0,487405391 | 6,37E-05    | 0,00301116  |
| 0,487393235 | 0,004374182 | 0,044340892 |
| 0,487325581 | 9,01E-06    | 9,00E-04    |
| 0,486902748 | 5,31E-04    | 0,011700411 |
| 0,486896406 | 3,78E-05    | 0,002168435 |
| 0,486716173 | 2,83E-04    | 0,007759204 |
| 0,486546512 | 4,01E-04    | 0,009759681 |
| 0,486515856 | 0,004617971 | 0,045669692 |
| 0,486276427 | 0,00350452  | 0,038620723 |
| 0,486201374 | 0,002526922 | 0,031418958 |
| 0,486195032 | 0,00421455  | 0,04353839  |
| 0,486073467 | 0,001256139 | 0,0202144   |
| 0,485790698 | 0,002508834 | 0,031300605 |
| 0,485567125 | 0,002541544 | 0,031549285 |
| 0,485374207 | 0,005159429 | 0,049204246 |
| 0,485179704 | 4,57E-04    | 0,010543218 |
| 0,484720402 | 2,17E-05    | 0,001563442 |
| 0,484619979 | 6,92E-04    | 0,013724255 |
| 0,484613636 | 5,17E-04    | 0,011502768 |



# Supplementary\_table\_S2

|             |             |             |
|-------------|-------------|-------------|
| 0,484256342 | 2,83E-04    | 0,007759204 |
| 0,483635835 | 0,004959337 | 0,047898676 |
| 0,483547569 | 0,001318056 | 0,020768119 |
| 0,483057082 | 8,13E-04    | 0,015220961 |
| 0,4827463   | 1,11E-04    | 0,004255047 |
| 0,482424419 | 0,003813218 | 0,040693817 |
| 0,482358879 | 0,002189601 | 0,02862741  |
| 0,481628436 | 1,64E-05    | 0,001289977 |
| 0,481362051 | 0,003379688 | 0,037911066 |
| 0,480853594 | 3,26E-04    | 0,008477337 |
| 0,48079334  | 0,003064358 | 0,035591387 |
| 0,480715645 | 0,004451932 | 0,044754424 |
| 0,480165433 | 0,001228839 | 0,019940761 |
| 0,479957188 | 0,004516227 | 0,045135924 |
| 0,47981871  | 3,66E-04    | 0,009126551 |
| 0,479748943 | 1,68E-04    | 0,005583663 |
| 0,479369979 | 6,15E-04    | 0,012692396 |
| 0,479331924 | 0,001957757 | 0,026490373 |
| 0,47880444  | 7,03E-06    | 7,93E-04    |
| 0,478743658 | 7,56E-04    | 0,014524687 |
| 0,478663319 | 2,73E-04    | 0,00762624  |
| 0,478628436 | 9,24E-04    | 0,016669981 |
| 0,478539112 | 0,003918376 | 0,041497892 |
| 0,478460888 | 0,004670551 | 0,045976804 |
| 0,478280655 | 0,001327349 | 0,020848172 |
| 0,478040698 | 0,001844933 | 0,025474483 |
| 0,477912791 | 0,002283988 | 0,029463638 |
| 0,477825053 | 2,27E-04    | 0,00674015  |
| 0,477767442 | 0,001272219 | 0,020355511 |
| 0,477762685 | 1,71E-04    | 0,005640263 |
| 0,477278013 | 8,57E-04    | 0,015754112 |
| 0,477150106 | 5,51E-04    | 0,01196545  |
| 0,476567125 | 1,59E-05    | 0,001271059 |
| 0,476377907 | 6,69E-04    | 0,01346176  |
| 0,47609408  | 3,69E-04    | 0,009176939 |
| 0,475979915 | 1,50E-05    | 0,0012336   |
| 0,475419133 | 2,38E-04    | 0,00697858  |
| 0,475205074 | 3,48E-04    | 0,008859432 |
| 0,47480444  | 1,16E-04    | 0,004404682 |
| 0,474587209 | 0,004122527 | 0,043056004 |
| 0,474176533 | 0,003388501 | 0,037990783 |
| 0,473776956 | 0,002932105 | 0,034634759 |
| 0,473508457 | 5,78E-04    | 0,012227872 |
| 0,473504757 | 0,002719286 | 0,032968933 |
| 0,473417019 | 0,003320446 | 0,037481244 |
| 0,472223573 | 6,68E-05    | 0,003086127 |
| 0,472202431 | 6,86E-05    | 0,003138992 |
| 0,472115751 | 0,001174384 | 0,019403475 |
| 0,472068182 | 0,001400397 | 0,021539802 |
| 0,472007928 | 4,10E-04    | 0,009884298 |
| 0,471987315 | 0,003561958 | 0,039036452 |
| 0,471904863 | 0,001451307 | 0,022038492 |
| 0,471725687 | 9,78E-05    | 0,003939475 |

# Supplementary\_table\_S2

|             |             |             |
|-------------|-------------|-------------|
| 0,471716173 | 4,40E-04    | 0,010291188 |
| 0,471705603 | 0,003864355 | 0,041091865 |
| 0,471433932 | 4,78E-05    | 0,002479468 |
| 0,471384249 | 9,45E-04    | 0,01685263  |
| 0,471136364 | 2,30E-04    | 0,006830579 |
| 0,471002643 | 0,001664002 | 0,023894678 |
| 0,470961945 | 0,0046345   | 0,045763928 |
| 0,470812368 | 0,003478781 | 0,03851823  |
| 0,470189746 | 7,20E-05    | 0,003227737 |
| 0,469670719 | 0,003505379 | 0,038620723 |
| 0,469193446 | 2,59E-04    | 0,007407658 |
| 0,469050211 | 2,09E-04    | 0,006402118 |
| 0,468768499 | 2,25E-04    | 0,006704079 |
| 0,468323996 | 5,14E-04    | 0,011451009 |
| 0,46829334  | 6,20E-05    | 0,00296404  |
| 0,468233615 | 2,25E-04    | 0,006711698 |
| 0,467932347 | 0,002223204 | 0,028905552 |
| 0,467927061 | 9,66E-04    | 0,017066695 |
| 0,467598309 | 0,003075631 | 0,035627242 |
| 0,467573996 | 4,06E-04    | 0,009842211 |
| 0,467520613 | 3,35E-04    | 0,008605302 |
| 0,467428118 | 4,05E-04    | 0,009832897 |
| 0,467409091 | 0,002016958 | 0,026951785 |
| 0,467360994 | 0,001022747 | 0,01772656  |
| 0,467210888 | 1,78E-04    | 0,005792816 |
| 0,467       | 0,004612593 | 0,045668668 |
| 0,46668129  | 0,004312209 | 0,044050124 |
| 0,466672304 | 0,002690681 | 0,032755865 |
| 0,466637949 | 4,11E-04    | 0,009914046 |
| 0,466489958 | 7,49E-04    | 0,014450483 |
| 0,465994715 | 4,58E-04    | 0,010561152 |
| 0,465755285 | 0,003426648 | 0,038263473 |
| 0,465539641 | 2,66E-05    | 0,001764845 |
| 0,465510042 | 7,21E-06    | 8,05E-04    |
| 0,465318182 | 0,002677185 | 0,032636157 |
| 0,464659091 | 0,002422132 | 0,030600633 |
| 0,464417019 | 0,004155255 | 0,04322552  |
| 0,464013742 | 0,00115865  | 0,019250152 |
| 0,463965116 | 0,003480057 | 0,038522781 |
| 0,463786998 | 0,001712974 | 0,024401247 |
| 0,463738372 | 9,13E-05    | 0,003726602 |
| 0,463531184 | 0,00476013  | 0,046530153 |
| 0,463033827 | 3,17E-05    | 0,001951337 |
| 0,462455074 | 8,63E-05    | 0,003616575 |
| 0,462039641 | 0,004022262 | 0,042336396 |
| 0,461797569 | 0,001469378 | 0,022199283 |
| 0,461631078 | 0,001639332 | 0,023727325 |
| 0,46125     | 5,88E-04    | 0,012359415 |
| 0,461046512 | 0,003705321 | 0,040012979 |
| 0,460575053 | 0,003076913 | 0,035627242 |
| 0,460523256 | 3,11E-04    | 0,00823789  |
| 0,460230444 | 0,001011807 | 0,01759856  |
| 0,459943975 | 0,003970325 | 0,041908571 |

# Supplementary\_table\_S2

|             |             |             |
|-------------|-------------|-------------|
| 0,459900634 | 1,26E-04    | 0,004674132 |
| 0,459895349 | 1,20E-05    | 0,001068665 |
| 0,459883192 | 2,69E-04    | 0,007582082 |
| 0,459878964 | 6,65E-06    | 7,68E-04    |
| 0,459731501 | 8,35E-05    | 0,003533845 |
| 0,459610465 | 3,22E-05    | 0,001964194 |
| 0,459570296 | 0,003717892 | 0,040089514 |
| 0,459326638 | 0,001669108 | 0,023941766 |
| 0,45929704  | 1,40E-04    | 0,004993368 |
| 0,459280655 | 0,001748985 | 0,024708788 |
| 0,459277484 | 2,07E-04    | 0,006360711 |
| 0,459275899 | 6,43E-04    | 0,013101756 |
| 0,459222516 | 0,00330721  | 0,037456486 |
| 0,458690803 | 0,004608188 | 0,045637477 |
| 0,458352537 | 7,39E-04    | 0,014323063 |
| 0,45773203  | 5,55E-04    | 0,012019926 |
| 0,457591438 | 0,00472068  | 0,046275959 |
| 0,457573467 | 8,24E-04    | 0,015357341 |
| 0,456845137 | 6,10E-04    | 0,012648831 |
| 0,456815539 | 0,00442612  | 0,044644282 |
| 0,456108351 | 0,001517153 | 0,022677879 |
| 0,456063953 | 1,70E-04    | 0,00559584  |
| 0,455821882 | 0,001852543 | 0,025532084 |
| 0,455787526 | 0,00237395  | 0,030169828 |
| 0,45568129  | 4,58E-04    | 0,010561152 |
| 0,455408034 | 0,004575905 | 0,045521965 |
| 0,455378436 | 0,001061898 | 0,018241883 |
| 0,455169133 | 9,27E-04    | 0,016711341 |
| 0,454581395 | 0,001958385 | 0,026490833 |
| 0,454365751 | 0,004313637 | 0,044050124 |
| 0,454106765 | 0,001570154 | 0,023120972 |
| 0,45382611  | 0,002247359 | 0,029134564 |
| 0,453587209 | 0,003481856 | 0,038527525 |
| 0,453078224 | 5,81E-04    | 0,012276824 |
| 0,453008985 | 1,69E-04    | 0,00559584  |
| 0,452591966 | 1,64E-04    | 0,005496793 |
| 0,45257611  | 0,001483136 | 0,022319186 |
| 0,452541226 | 7,79E-04    | 0,01479303  |
| 0,452528541 | 4,96E-05    | 0,002550636 |
| 0,452345137 | 0,002600356 | 0,032014999 |
| 0,451890592 | 7,50E-07    | 2,31E-04    |
| 0,451606765 | 0,002096574 | 0,027736798 |
| 0,451075581 | 8,23E-04    | 0,015353242 |
| 0,450697146 | 0,002425854 | 0,030619749 |
| 0,450244186 | 8,74E-05    | 0,0036389   |
| 0,450088266 | 1,89E-04    | 0,005994917 |
| 0,44897093  | 0,00516079  | 0,049204246 |
| 0,448911734 | 0,003683459 | 0,039882355 |
| 0,448848309 | 0,002924977 | 0,034587252 |
| 0,448742072 | 0,003669822 | 0,039773367 |
| 0,448429175 | 0,00285315  | 0,034008759 |
| 0,447502114 | 5,08E-05    | 0,002582144 |
| 0,447026427 | 0,001439243 | 0,021946324 |

# Supplementary\_table\_S2

|             |             |             |
|-------------|-------------|-------------|
| 0,446963002 | 8,07E-04    | 0,015150346 |
| 0,446959831 | 0,00107679  | 0,018422534 |
| 0,446776956 | 0,003916749 | 0,041490525 |
| 0,446505285 | 0,004465298 | 0,044829065 |
| 0,446435518 | 0,005084632 | 0,048749053 |
| 0,446421247 | 0,004814862 | 0,04690304  |
| 0,446298097 | 0,001448818 | 0,022032446 |
| 0,446104651 | 0,002876776 | 0,034207985 |
| 0,44610148  | 8,52E-06    | 8,69E-04    |
| 0,445903805 | 0,001856972 | 0,025571453 |
| 0,445544926 | 4,15E-04    | 0,009972409 |
| 0,445393763 | 1,51E-04    | 0,005259016 |
| 0,445202431 | 8,69E-04    | 0,015926312 |
| 0,445195032 | 1,21E-04    | 0,004533065 |
| 0,444663848 | 0,003151036 | 0,036175196 |
| 0,444570296 | 0,001126415 | 0,0189374   |
| 0,444533298 | 6,60E-04    | 0,01331298  |
| 0,444340909 | 0,003019959 | 0,035251852 |
| 0,443946617 | 6,55E-04    | 0,013281876 |
| 0,443650634 | 0,001487084 | 0,022355946 |
| 0,442457188 | 0,003447049 | 0,038329744 |
| 0,44226797  | 0,003087901 | 0,035717338 |
| 0,441975159 | 0,002613581 | 0,032140027 |
| 0,441884249 | 0,002910555 | 0,034462456 |
| 0,441483087 | 1,33E-04    | 0,004833434 |
| 0,441294926 | 0,002974604 | 0,034896173 |
| 0,441286998 | 0,002428929 | 0,0306396   |
| 0,441211416 | 3,25E-04    | 0,008477337 |
| 0,441195032 | 0,00261971  | 0,032190997 |
| 0,440614693 | 7,75E-05    | 0,003382553 |
| 0,44004334  | 2,50E-06    | 4,31E-04    |
| 0,43987685  | 0,004805063 | 0,046855675 |
| 0,4394926   | 0,005166812 | 0,04924058  |
| 0,43914852  | 0,004181978 | 0,043345768 |
| 0,438724101 | 1,78E-04    | 0,005792816 |
| 0,438323467 | 7,40E-04    | 0,014323063 |
| 0,437795455 | 2,34E-04    | 0,006890111 |
| 0,4374963   | 1,08E-04    | 0,00418342  |
| 0,437403277 | 2,24E-04    | 0,006689908 |
| 0,436778013 | 2,91E-05    | 0,001866567 |
| 0,43667389  | 8,84E-04    | 0,016110334 |
| 0,436614165 | 0,003051306 | 0,035516784 |
| 0,436346195 | 0,002985373 | 0,034967748 |
| 0,436249471 | 1,44E-04    | 0,005062162 |
| 0,435822939 | 4,25E-04    | 0,010090913 |
| 0,435763214 | 5,62E-04    | 0,012058374 |
| 0,435437632 | 1,40E-04    | 0,004976299 |
| 0,435372093 | 4,07E-04    | 0,009842211 |
| 0,435231501 | 0,002971366 | 0,034879204 |
| 0,433535941 | 0,005231242 | 0,04957882  |
| 0,433429704 | 0,002075412 | 0,027571474 |
| 0,433272727 | 2,01E-04    | 0,00621794  |
| 0,433188689 | 0,003419747 | 0,038225654 |

# Supplementary\_table\_S2

|             |             |             |
|-------------|-------------|-------------|
| 0,433002114 | 4,44E-05    | 0,002391693 |
| 0,432868393 | 5,25E-04    | 0,011622432 |
| 0,432426533 | 3,30E-04    | 0,008527772 |
| 0,432198203 | 0,001522478 | 0,022727947 |
| 0,431801797 | 0,003772121 | 0,040390707 |
| 0,431158562 | 0,001114335 | 0,018816132 |
| 0,431049683 | 1,91E-04    | 0,006022449 |
| 0,430288055 | 5,10E-04    | 0,011387241 |
| 0,43009408  | 0,002959744 | 0,03483192  |
| 0,429792283 | 1,83E-04    | 0,005869493 |
| 0,429491543 | 0,002958819 | 0,034830245 |
| 0,429293869 | 0,001988418 | 0,026702468 |
| 0,429236258 | 1,35E-04    | 0,004874403 |
| 0,428881607 | 0,004379001 | 0,044351479 |
| 0,428850423 | 0,0013942   | 0,021516466 |
| 0,428513742 | 1,78E-05    | 0,001369277 |
| 0,428048097 | 0,001506311 | 0,022568821 |
| 0,427771142 | 0,002884859 | 0,034261687 |
| 0,427525899 | 0,001110914 | 0,018793982 |
| 0,42723203  | 4,07E-04    | 0,009842211 |
| 0,426877907 | 0,001944079 | 0,026353335 |
| 0,426866808 | 0,002229323 | 0,028949002 |
| 0,426754757 | 3,08E-04    | 0,008180522 |
| 0,426720402 | 0,004280776 | 0,04395641  |
| 0,425716702 | 0,002104042 | 0,027810811 |
| 0,425465116 | 0,001561028 | 0,02303227  |
| 0,4252426   | 5,02E-05    | 0,002559682 |
| 0,425227801 | 7,56E-04    | 0,014524687 |
| 0,425088266 | 0,003050702 | 0,035516784 |
| 0,424835095 | 4,04E-04    | 0,009811395 |
| 0,424683932 | 0,003070344 | 0,035597445 |
| 0,424676533 | 0,00374904  | 0,040269407 |
| 0,424029598 | 0,004608418 | 0,045637477 |
| 0,423462474 | 0,004815414 | 0,04690304  |
| 0,423089323 | 0,001088035 | 0,018549713 |
| 0,422837738 | 3,76E-04    | 0,009305519 |
| 0,422291226 | 0,004622889 | 0,045689369 |
| 0,42210518  | 7,74E-04    | 0,014754587 |
| 0,422029598 | 0,001293857 | 0,02061018  |
| 0,421827167 | 0,004440818 | 0,044693128 |
| 0,421534355 | 0,004833668 | 0,047021382 |
| 0,421292283 | 0,00121349  | 0,019803777 |
| 0,421182347 | 0,001049094 | 0,018056734 |
| 0,421078224 | 9,59E-04    | 0,017004371 |
| 0,421068182 | 0,002858758 | 0,034057378 |
| 0,420775899 | 3,93E-04    | 0,009656577 |
| 0,420215116 | 0,001650768 | 0,023776637 |
| 0,419772199 | 6,61E-05    | 0,003069979 |
| 0,419718288 | 3,94E-04    | 0,009664799 |
| 0,419673362 | 0,003014368 | 0,035205031 |
| 0,419238372 | 0,003717022 | 0,040089514 |
| 0,419223573 | 3,28E-04    | 0,008506843 |
| 0,419082452 | 0,004117921 | 0,043028072 |

# Supplementary\_table\_S2

|             |             |             |
|-------------|-------------|-------------|
| 0,419009514 | 1,26E-04    | 0,00466353  |
| 0,418725159 | 0,001178627 | 0,019459137 |
| 0,418704017 | 0,003946785 | 0,041749129 |
| 0,418419133 | 1,53E-05    | 0,00124424  |
| 0,41822463  | 0,003206487 | 0,036604245 |
| 0,418186047 | 6,84E-04    | 0,013647932 |
| 0,418143235 | 0,002158479 | 0,028346591 |
| 0,418012156 | 4,48E-05    | 0,00239942  |
| 0,417975159 | 0,004896831 | 0,047464925 |
| 0,417745243 | 5,12E-05    | 0,002587139 |
| 0,417516913 | 0,001358168 | 0,0211977   |
| 0,417374207 | 3,28E-04    | 0,008505116 |
| 0,417012685 | 0,005283271 | 0,049943673 |
| 0,416710888 | 0,001985988 | 0,026677878 |
| 0,416593023 | 1,16E-05    | 0,001044039 |
| 0,416124736 | 0,001490406 | 0,02239078  |
| 0,416113636 | 0,001381372 | 0,021365219 |
| 0,416096723 | 1,99E-04    | 0,006185713 |
| 0,415816068 | 0,003906099 | 0,04143684  |
| 0,414963531 | 0,001913038 | 0,026067408 |
| 0,414469345 | 0,003577503 | 0,039144258 |
| 0,414425476 | 2,25E-06    | 4,03E-04    |
| 0,414421776 | 0,003789727 | 0,040501347 |
| 0,413791755 | 1,43E-04    | 0,005059531 |
| 0,413498943 | 0,002055458 | 0,027355335 |
| 0,412955603 | 0,001296152 | 0,020634662 |
| 0,412537526 | 0,001446704 | 0,022032446 |
| 0,412003171 | 0,00289855  | 0,03438429  |
| 0,41176797  | 0,001201906 | 0,019655014 |
| 0,411763214 | 0,001895006 | 0,02590398  |
| 0,411563953 | 0,003512478 | 0,038661921 |
| 0,410761099 | 0,001427639 | 0,021823185 |
| 0,410323996 | 0,00115298  | 0,01917788  |
| 0,410266913 | 0,001416213 | 0,021715596 |
| 0,410212474 | 7,52E-04    | 0,014499707 |
| 0,410192918 | 2,21E-05    | 0,001585299 |
| 0,410185518 | 8,44E-04    | 0,015594173 |
| 0,410110465 | 0,002076579 | 0,02757875  |
| 0,41010148  | 0,001031423 | 0,017807642 |
| 0,410095666 | 0,001969817 | 0,026572839 |
| 0,409773784 | 0,001646195 | 0,023775293 |
| 0,409636892 | 0,002315337 | 0,029696046 |
| 0,409635835 | 1,86E-04    | 0,005938807 |
| 0,408887421 | 0,003068223 | 0,035591387 |
| 0,408629493 | 1,91E-04    | 0,006024593 |
| 0,408476744 | 0,002125895 | 0,028041413 |
| 0,408293869 | 0,004257529 | 0,043795131 |
| 0,408037526 | 0,004682272 | 0,046051476 |
| 0,407641649 | 0,003156481 | 0,036200382 |
| 0,40761945  | 5,03E-04    | 0,011290289 |
| 0,406989958 | 0,004446204 | 0,044727123 |
| 0,406915962 | 7,76E-04    | 0,014772651 |
| 0,406765856 | 0,002313858 | 0,029685627 |

# Supplementary\_table\_S2

|             |             |             |
|-------------|-------------|-------------|
| 0,406428647 | 0,001245698 | 0,020111774 |
| 0,406221459 | 0,001847929 | 0,025492144 |
| 0,40621723  | 0,002861302 | 0,034067536 |
| 0,406197146 | 0,001408206 | 0,021615132 |
| 0,406168605 | 0,002366947 | 0,030106589 |
| 0,405979915 | 2,09E-04    | 0,006402118 |
| 0,405338266 | 0,002353041 | 0,029998242 |
| 0,405226744 | 0,001213728 | 0,019803777 |
| 0,405088795 | 0,002038807 | 0,027166206 |
| 0,405034355 | 0,003332103 | 0,037585519 |
| 0,404103066 | 0,004934852 | 0,047755387 |
| 0,404058668 | 0,003168725 | 0,036303416 |
| 0,402888478 | 0,001449737 | 0,022032446 |
| 0,402386892 | 2,56E-04    | 0,007359599 |
| 0,401980444 | 0,003938456 | 0,041687333 |
| 0,401646406 | 0,001654793 | 0,023816186 |
| 0,401506871 | 6,63E-04    | 0,013370653 |
| 0,401204017 | 0,003334693 | 0,037586179 |
| 0,401178118 | 1,79E-04    | 0,005797805 |
| 0,40060518  | 0,003132319 | 0,036040925 |
| 0,400518499 | 0,00296286  | 0,034850176 |
| 0,400273256 | 0,005094901 | 0,048784879 |
| 0,3997426   | 6,95E-04    | 0,013735308 |
| 0,399442389 | 0,004544365 | 0,045295186 |
| 0,39934408  | 7,40E-06    | 8,19E-04    |
| 0,399334038 | 0,001916414 | 0,026097444 |
| 0,398921776 | 7,54E-04    | 0,014518574 |
| 0,398647992 | 3,45E-04    | 0,008794861 |
| 0,39840592  | 0,001970545 | 0,026574613 |
| 0,398201903 | 5,83E-04    | 0,012285835 |
| 0,397539112 | 8,21E-04    | 0,015322631 |
| 0,396778013 | 0,001166961 | 0,019331022 |
| 0,396675476 | 0,003127045 | 0,036011136 |
| 0,396604123 | 0,004512884 | 0,045112637 |
| 0,396565539 | 0,005113406 | 0,048920013 |
| 0,396491543 | 5,56E-04    | 0,012019926 |
| 0,39527907  | 2,66E-04    | 0,007532706 |
| 0,395153277 | 0,001300689 | 0,020651518 |
| 0,394410148 | 0,002972591 | 0,034881747 |
| 0,394368393 | 0,003088921 | 0,035717589 |
| 0,394121036 | 0,004435167 | 0,044650533 |
| 0,39373203  | 1,53E-04    | 0,005289296 |
| 0,393463002 | 0,001285766 | 0,02052802  |
| 0,393451374 | 0,001138028 | 0,019042637 |
| 0,39335148  | 0,002646063 | 0,032396337 |
| 0,3927537   | 1,91E-04    | 0,006024593 |
| 0,392392706 | 0,003455922 | 0,038392006 |
| 0,391912791 | 1,30E-04    | 0,004770434 |
| 0,39162315  | 0,005151632 | 0,04915382  |
| 0,391405391 | 7,42E-05    | 0,003290333 |
| 0,391152748 | 0,001579653 | 0,023214803 |
| 0,390815011 | 2,85E-04    | 0,007759204 |
| 0,390575581 | 0,004134584 | 0,043121266 |

# Supplementary\_table\_S2

|             |             |             |
|-------------|-------------|-------------|
| 0,390401691 | 0,001023671 | 0,017728772 |
| 0,390302326 | 0,001969742 | 0,026572839 |
| 0,38997463  | 0,005274147 | 0,049909489 |
| 0,389726216 | 9,56E-04    | 0,016978047 |
| 0,389664905 | 0,001363718 | 0,021224826 |
| 0,389390592 | 2,42E-04    | 0,007064463 |
| 0,389034884 | 0,002245284 | 0,029116138 |
| 0,388939218 | 2,33E-04    | 0,006874218 |
| 0,3887574   | 7,29E-05    | 0,003256747 |
| 0,388741015 | 5,34E-04    | 0,011749934 |
| 0,388540698 | 4,42E-04    | 0,010303274 |
| 0,388497886 | 0,001714376 | 0,024409086 |
| 0,387976216 | 0,001319113 | 0,020768523 |
| 0,387455074 | 0,003082799 | 0,035671111 |
| 0,386714059 | 0,004573533 | 0,045521965 |
| 0,386488901 | 0,001424754 | 0,021796405 |
| 0,385783827 | 0,002796642 | 0,033550662 |
| 0,38560148  | 0,004506233 | 0,045064623 |
| 0,385576638 | 0,001501503 | 0,022527092 |
| 0,38512685  | 6,97E-04    | 0,013756067 |
| 0,385091438 | 0,001787572 | 0,025021877 |
| 0,384933932 | 5,71E-04    | 0,012176757 |
| 0,384345137 | 0,001618071 | 0,023564177 |
| 0,38432611  | 0,004979374 | 0,047988148 |
| 0,383988901 | 0,00369596  | 0,039959428 |
| 0,383686047 | 5,56E-04    | 0,012019926 |
| 0,383263214 | 0,001380997 | 0,021365219 |
| 0,383033827 | 0,003298374 | 0,037392715 |
| 0,382961416 | 6,81E-04    | 0,013599132 |
| 0,382447674 | 3,16E-04    | 0,008314475 |
| 0,38185518  | 0,001870634 | 0,02570189  |
| 0,381621036 | 0,00185827  | 0,025571453 |
| 0,380840381 | 1,76E-04    | 0,005735638 |
| 0,380675476 | 0,002723121 | 0,033006444 |
| 0,380633192 | 0,001544977 | 0,022873018 |
| 0,380430761 | 0,002767854 | 0,033285986 |
| 0,380377378 | 4,71E-04    | 0,010746062 |
| 0,379904334 | 0,001977713 | 0,026629479 |
| 0,379669133 | 0,002945443 | 0,034740424 |
| 0,379457717 | 1,62E-04    | 0,005444242 |
| 0,379332452 | 0,002227898 | 0,028941237 |
| 0,378953488 | 0,001387295 | 0,021441933 |
| 0,37895296  | 1,42E-04    | 0,005027842 |
| 0,378928647 | 9,65E-04    | 0,017065388 |
| 0,37880444  | 8,46E-04    | 0,015628057 |
| 0,378603066 | 0,004303995 | 0,044022306 |
| 0,377998943 | 4,43E-05    | 0,002389556 |
| 0,377827167 | 0,005225246 | 0,049574727 |
| 0,377616279 | 4,15E-04    | 0,009972409 |
| 0,377244715 | 0,001745709 | 0,024685986 |
| 0,377139006 | 0,003686796 | 0,039893015 |
| 0,376467759 | 1,36E-04    | 0,004905178 |
| 0,376438161 | 9,81E-04    | 0,017273018 |



# Supplementary\_table\_S2

|             |             |             |
|-------------|-------------|-------------|
| 0,376341966 | 8,71E-04    | 0,01594887  |
| 0,37590592  | 0,00372421  | 0,040114248 |
| 0,375341966 | 0,002224348 | 0,028911983 |
| 0,374946089 | 0,001138102 | 0,019042637 |
| 0,374786469 | 0,001382547 | 0,021375969 |
| 0,374165433 | 0,001742968 | 0,024662889 |
| 0,373649577 | 2,45E-04    | 0,007135035 |
| 0,373447674 | 0,00150273  | 0,022537916 |
| 0,373357294 | 0,004320005 | 0,044057139 |
| 0,371133192 | 0,001324072 | 0,020811377 |
| 0,371094609 | 5,12E-04    | 0,011426534 |
| 0,37084408  | 0,002262033 | 0,029273677 |
| 0,370785941 | 5,38E-04    | 0,011786355 |
| 0,370580867 | 0,003730548 | 0,040148235 |
| 0,370097252 | 0,005042044 | 0,048445384 |
| 0,369784884 | 0,004466115 | 0,044829065 |
| 0,369709302 | 3,84E-04    | 0,009461867 |
| 0,369001586 | 0,004206637 | 0,043475742 |
| 0,368815011 | 0,001828449 | 0,025343382 |
| 0,368488901 | 0,00259103  | 0,031926649 |
| 0,368352537 | 0,003725966 | 0,040118302 |
| 0,368283298 | 9,29E-04    | 0,016717931 |
| 0,367940275 | 2,22E-04    | 0,006655488 |
| 0,367906977 | 0,001128227 | 0,018950138 |
| 0,367569767 | 5,15E-05    | 0,002595405 |
| 0,366669133 | 6,75E-04    | 0,0135127   |
| 0,36654334  | 2,90E-04    | 0,007855215 |
| 0,366016385 | 7,93E-04    | 0,014958655 |
| 0,365289112 | 5,87E-04    | 0,012347473 |
| 0,365163319 | 0,00296833  | 0,034868488 |
| 0,364861522 | 0,001894271 | 0,02590398  |
| 0,364054968 | 0,004545817 | 0,045299521 |
| 0,363909091 | 0,001926054 | 0,0261807   |
| 0,363474101 | 0,003989084 | 0,04205675  |
| 0,36317759  | 0,003139526 | 0,036089559 |
| 0,362510571 | 0,00120428  | 0,019678443 |
| 0,362150634 | 0,00430305  | 0,044022306 |
| 0,362058668 | 0,004526209 | 0,04517724  |
| 0,361541226 | 0,005219521 | 0,049543858 |
| 0,360947674 | 0,004316691 | 0,044057139 |
| 0,360569767 | 0,001260215 | 0,020250729 |
| 0,360218288 | 0,004663591 | 0,045932222 |
| 0,360123679 | 0,001941297 | 0,026336862 |
| 0,360011628 | 0,001362963 | 0,021224826 |
| 0,359748414 | 0,002668337 | 0,032555032 |
| 0,358882664 | 0,00517607  | 0,049307715 |
| 0,358721987 | 9,96E-04    | 0,017433268 |
| 0,358656977 | 0,001812819 | 0,025234445 |
| 0,358252114 | 0,001018823 | 0,017686066 |
| 0,357960888 | 0,002169712 | 0,028434136 |
| 0,357701903 | 0,004520777 | 0,045144306 |
| 0,356309725 | 0,005278482 | 0,049920316 |
| 0,356008457 | 2,21E-05    | 0,001585299 |

# Supplementary\_table\_S2

|             |             |             |
|-------------|-------------|-------------|
| 0,355484672 | 4,93E-04    | 0,011129617 |
| 0,355421776 | 8,66E-04    | 0,015885798 |
| 0,35512685  | 9,91E-04    | 0,01736895  |
| 0,353252114 | 0,001667709 | 0,023932489 |
| 0,353211416 | 0,002501719 | 0,031247278 |
| 0,352820296 | 5,13E-04    | 0,011433308 |
| 0,352370507 | 4,07E-06    | 5,79E-04    |
| 0,352059197 | 0,001141542 | 0,019058788 |
| 0,351692389 | 4,07E-04    | 0,009842211 |
| 0,350809197 | 0,003667625 | 0,039759237 |
| 0,350616279 | 0,002458458 | 0,030908714 |
| 0,350224101 | 3,15E-04    | 0,008303463 |
| 0,349732558 | 0,002631193 | 0,032296465 |
| 0,348669662 | 0,001755667 | 0,024756076 |
| 0,348507928 | 0,003004272 | 0,03511474  |
| 0,347746829 | 0,001479007 | 0,022287174 |
| 0,346887421 | 0,001202256 | 0,019655014 |
| 0,346445032 | 0,00243764  | 0,030716331 |
| 0,345786469 | 0,003340464 | 0,037613157 |
| 0,345765328 | 0,001066409 | 0,018294399 |
| 0,345701903 | 0,002692489 | 0,032759963 |
| 0,34564852  | 0,004139879 | 0,043156274 |
| 0,344578753 | 0,005197038 | 0,049439911 |
| 0,344525899 | 8,80E-04    | 0,016050303 |
| 0,343877378 | 7,38E-04    | 0,014316344 |
| 0,343709302 | 0,002576715 | 0,031794236 |
| 0,34289852  | 0,004596596 | 0,045621381 |
| 0,342284355 | 0,003487282 | 0,038527525 |
| 0,341176533 | 0,002108461 | 0,027855599 |
| 0,340553383 | 8,90E-04    | 0,016177196 |
| 0,340168605 | 2,79E-04    | 0,007731199 |
| 0,340022727 | 0,001783534 | 0,025021877 |
| 0,339021142 | 0,004275373 | 0,043925254 |
| 0,338950317 | 0,002822589 | 0,033725702 |
| 0,338856765 | 0,003264469 | 0,037113959 |
| 0,338391121 | 0,002229796 | 0,028949002 |
| 0,337188161 | 1,21E-04    | 0,004544245 |
| 0,337161205 | 0,002861906 | 0,034067536 |
| 0,336745243 | 0,004090729 | 0,0428072   |
| 0,336620507 | 0,001110236 | 0,018793982 |
| 0,336328224 | 0,003110345 | 0,035855897 |
| 0,334764271 | 0,002211946 | 0,028794261 |
| 0,33445296  | 0,00456946  | 0,045494415 |
| 0,33343129  | 0,002259204 | 0,029262565 |
| 0,333232558 | 0,001637194 | 0,023708445 |
| 0,331087209 | 4,02E-04    | 0,009780498 |
| 0,331015328 | 8,60E-04    | 0,015802141 |
| 0,330450317 | 1,47E-04    | 0,005136852 |
| 0,329684989 | 0,004430767 | 0,044644282 |
| 0,329598837 | 0,00200388  | 0,026861515 |
| 0,329457188 | 7,20E-04    | 0,014075384 |
| 0,328966702 | 0,001742625 | 0,024662889 |
| 0,328763742 | 0,002424361 | 0,030609623 |

# Supplementary\_table\_S2

|             |             |             |
|-------------|-------------|-------------|
| 0,32785148  | 0,004091017 | 0,0428072   |
| 0,327015328 | 0,004810181 | 0,046895312 |
| 0,326964059 | 7,66E-04    | 0,014661389 |
| 0,326939218 | 0,001301383 | 0,020651518 |
| 0,326896934 | 0,003705405 | 0,040012979 |
| 0,326233615 | 0,003145967 | 0,036144948 |
| 0,325841966 | 0,002272858 | 0,029379628 |
| 0,325664905 | 0,002862857 | 0,034069755 |
| 0,324752643 | 0,004784155 | 0,046684697 |
| 0,32437315  | 0,001259123 | 0,020240478 |
| 0,324036998 | 5,12E-05    | 0,002587139 |
| 0,322897992 | 8,45E-04    | 0,01561541  |
| 0,60663755  | 6,45E-06    | 1,64E-04    |
| 0,578250103 | 8,87E-08    | 4,61E-06    |
| 0,554209079 | 1,97E-05    | 4,09E-04    |
| 0,530944175 | 6,47E-14    | 4,64E-11    |
| 0,530549357 | 7,73E-05    | 0,001253932 |
| 0,528187914 | 2,44E-07    | 1,07E-05    |
| 0,521108482 | 4,51E-16    | 1,12E-12    |
| 0,519763623 | 2,10E-14    | 1,95E-11    |
| 0,518113034 | 8,11E-06    | 1,98E-04    |
| 0,513849789 | 1,06E-10    | 1,97E-08    |
| 0,51296253  | 1,06E-05    | 2,46E-04    |
| 0,511665683 | 2,44E-16    | 7,22E-13    |
| 0,511075744 | 7,02E-06    | 1,75E-04    |
| 0,507327346 | 1,24E-07    | 6,16E-06    |
| 0,506213871 | 1,16E-08    | 8,80E-07    |
| 0,501860086 | 5,64E-04    | 0,006192715 |
| 0,496369825 | 2,35E-06    | 7,11E-05    |
| 0,491704883 | 1,02E-08    | 7,91E-07    |
| 0,491326938 | 1,67E-09    | 1,77E-07    |
| 0,489714316 | 1,53E-09    | 1,66E-07    |
| 0,485393777 | 1,31E-06    | 4,34E-05    |
| 0,485199695 | 8,36E-16    | 1,72E-12    |
| 0,482502008 | 2,38E-05    | 4,76E-04    |
| 0,480479207 | 1,24E-04    | 0,001834693 |
| 0,479093689 | 1,33E-07    | 6,54E-06    |
| 0,478968329 | 1,95E-10    | 3,21E-08    |
| 0,478748129 | 1,34E-09    | 1,49E-07    |
| 0,477853087 | 3,74E-04    | 0,004468654 |
| 0,477566103 | 2,23E-05    | 4,54E-04    |
| 0,474998511 | 1,14E-12    | 4,83E-10    |
| 0,472669108 | 6,19E-09    | 5,26E-07    |
| 0,472532608 | 2,70E-04    | 0,003446856 |
| 0,471238732 | 4,48E-05    | 8,01E-04    |
| 0,471198047 | 9,75E-08    | 4,98E-06    |
| 0,470767134 | 1,56E-04    | 0,002215572 |
| 0,470191147 | 1,09E-14    | 1,14E-11    |
| 0,470150054 | 1,29E-13    | 7,42E-11    |
| 0,469900573 | 4,04E-12    | 1,34E-09    |
| 0,468991976 | 1,32E-10    | 2,38E-08    |
| 0,466917675 | 1,14E-13    | 6,93E-11    |
| 0,464717058 | 1,87E-05    | 3,92E-04    |

# Supplementary\_table\_S2

|             |             |             |
|-------------|-------------|-------------|
| 0,464053635 | 3,08E-04    | 0,003841094 |
| 0,463445741 | 2,21E-09    | 2,25E-07    |
| 0,460256689 | 0,002130587 | 0,017510556 |
| 0,460122417 | 4,32E-04    | 0,005021346 |
| 0,458049465 | 3,45E-15    | 4,50E-12    |
| 0,457604393 | 5,36E-04    | 0,005963129 |
| 0,45685268  | 1,20E-05    | 2,73E-04    |
| 0,45372934  | 2,33E-08    | 1,55E-06    |
| 0,45127649  | 1,18E-04    | 0,001759162 |
| 0,450491373 | 1,36E-10    | 2,43E-08    |
| 0,449910721 | 5,63E-09    | 4,82E-07    |
| 0,44815675  | 3,00E-07    | 1,26E-05    |
| 0,445891197 | 9,52E-16    | 1,81E-12    |
| 0,445681209 | 8,15E-04    | 0,008269392 |
| 0,44394114  | 2,37E-09    | 2,35E-07    |
| 0,44313077  | 2,30E-08    | 1,53E-06    |
| 0,442706741 | 8,30E-17    | 3,93E-13    |
| 0,442625198 | 7,20E-16    | 1,55E-12    |
| 0,441229122 | 5,94E-05    | 0,001005459 |
| 0,439030267 | 0,001085619 | 0,010298643 |
| 0,438951349 | 8,49E-11    | 1,68E-08    |
| 0,437608727 | 5,00E-04    | 0,00563742  |
| 0,43748624  | 2,84E-05    | 5,52E-04    |
| 0,437014976 | 4,87E-04    | 0,005514826 |
| 0,436390447 | 3,36E-10    | 5,06E-08    |
| 0,435126907 | 1,85E-08    | 1,28E-06    |
| 0,434440411 | 2,94E-07    | 1,24E-05    |
| 0,434103241 | 5,65E-10    | 7,62E-08    |
| 0,431933236 | 2,25E-06    | 6,86E-05    |
| 0,431125705 | 6,06E-07    | 2,26E-05    |
| 0,430833633 | 2,89E-04    | 0,003652367 |
| 0,430089494 | 4,42E-15    | 5,50E-12    |
| 0,429517708 | 1,50E-13    | 8,34E-11    |
| 0,428183346 | 7,54E-04    | 0,00778508  |
| 0,426359131 | 6,91E-06    | 1,73E-04    |
| 0,426205609 | 1,62E-12    | 6,24E-10    |
| 0,425054896 | 4,70E-12    | 1,52E-09    |
| 0,424606144 | 3,88E-14    | 3,16E-11    |
| 0,423864829 | 3,25E-08    | 2,04E-06    |
| 0,422967218 | 3,78E-09    | 3,51E-07    |
| 0,422913226 | 4,64E-08    | 2,73E-06    |
| 0,421695111 | 1,14E-12    | 4,83E-10    |
| 0,420634912 | 6,87E-12    | 2,11E-09    |
| 0,420027392 | 1,42E-09    | 1,58E-07    |
| 0,4188601   | 5,06E-10    | 7,07E-08    |
| 0,418734645 | 1,50E-08    | 1,09E-06    |
| 0,418665693 | 7,94E-12    | 2,30E-09    |
| 0,417254292 | 8,78E-12    | 2,49E-09    |
| 0,41680238  | 7,64E-10    | 9,74E-08    |
| 0,416517192 | 1,30E-08    | 9,64E-07    |
| 0,416120221 | 2,13E-09    | 2,19E-07    |
| 0,412976176 | 3,11E-15    | 4,21E-12    |
| 0,412558379 | 6,52E-39    | 3,09E-34    |

# Supplementary\_table\_S2

|             |             |             |
|-------------|-------------|-------------|
| 0,412406849 | 3,36E-09    | 3,20E-07    |
| 0,41065931  | 6,41E-11    | 1,32E-08    |
| 0,410398655 | 1,91E-05    | 3,99E-04    |
| 0,4091423   | 9,59E-09    | 7,53E-07    |
| 0,408701723 | 1,37E-11    | 3,62E-09    |
| 0,408434696 | 5,81E-09    | 4,96E-07    |
| 0,408186766 | 5,11E-15    | 6,20E-12    |
| 0,407620839 | 0,002323845 | 0,018744044 |
| 0,404419764 | 2,78E-19    | 6,57E-15    |
| 0,403968486 | 1,38E-15    | 2,18E-12    |
| 0,403492069 | 9,51E-11    | 1,82E-08    |
| 0,403259464 | 1,06E-12    | 4,69E-10    |
| 0,402909532 | 1,14E-08    | 8,65E-07    |
| 0,402119331 | 2,39E-06    | 7,20E-05    |
| 0,401761227 | 5,11E-07    | 1,95E-05    |
| 0,400550955 | 4,71E-07    | 1,82E-05    |
| 0,400476849 | 3,51E-06    | 9,86E-05    |
| 0,39921761  | 5,86E-16    | 1,39E-12    |
| 0,398364457 | 1,95E-04    | 0,002661579 |
| 0,397990905 | 1,21E-08    | 9,12E-07    |
| 0,397680411 | 3,82E-18    | 3,94E-14    |
| 0,39757424  | 3,02E-15    | 4,20E-12    |
| 0,397313842 | 1,78E-09    | 1,87E-07    |
| 0,396005092 | 1,17E-15    | 2,05E-12    |
| 0,395999798 | 4,91E-06    | 1,31E-04    |
| 0,395943415 | 2,69E-04    | 0,003444925 |
| 0,395645885 | 3,95E-16    | 1,04E-12    |
| 0,394758165 | 3,70E-16    | 1,03E-12    |
| 0,394509496 | 0,001757677 | 0,01506759  |
| 0,394407842 | 9,94E-16    | 1,81E-12    |
| 0,393290951 | 1,17E-05    | 2,69E-04    |
| 0,392937002 | 0,001309541 | 0,011938244 |
| 0,392537141 | 6,52E-11    | 1,34E-08    |
| 0,392452735 | 2,35E-09    | 2,34E-07    |
| 0,392447103 | 4,72E-13    | 2,33E-10    |
| 0,391378118 | 3,28E-10    | 4,97E-08    |
| 0,391123872 | 3,40E-05    | 6,40E-04    |
| 0,390525021 | 5,51E-08    | 3,16E-06    |
| 0,390079316 | 0,003644664 | 0,026284126 |
| 0,390048693 | 1,10E-05    | 2,55E-04    |
| 0,389934612 | 5,18E-04    | 0,005801626 |
| 0,389859644 | 8,10E-10    | 1,00E-07    |
| 0,388713507 | 5,90E-04    | 0,006431047 |
| 0,388245371 | 1,70E-08    | 1,19E-06    |
| 0,388170451 | 1,36E-11    | 3,62E-09    |
| 0,38753391  | 8,08E-09    | 6,49E-07    |
| 0,386840971 | 3,39E-13    | 1,71E-10    |
| 0,386488226 | 2,36E-09    | 2,35E-07    |
| 0,386275974 | 1,63E-16    | 5,95E-13    |
| 0,385779341 | 2,22E-08    | 1,48E-06    |
| 0,385573847 | 1,91E-06    | 6,00E-05    |
| 0,384606797 | 1,98E-13    | 1,06E-10    |
| 0,384532538 | 4,34E-09    | 3,93E-07    |

# Supplementary\_table\_S2

|             |             |             |
|-------------|-------------|-------------|
| 0,383829784 | 6,42E-05    | 0,001072876 |
| 0,382726424 | 1,24E-12    | 5,05E-10    |
| 0,382399649 | 6,08E-04    | 0,006578487 |
| 0,381978698 | 3,92E-04    | 0,004646963 |
| 0,381492817 | 6,80E-13    | 3,19E-10    |
| 0,381387376 | 3,23E-08    | 2,03E-06    |
| 0,381038551 | 6,68E-14    | 4,72E-11    |
| 0,380487431 | 1,36E-10    | 2,43E-08    |
| 0,380241802 | 2,11E-08    | 1,42E-06    |
| 0,379847837 | 7,95E-11    | 1,59E-08    |
| 0,379647216 | 7,70E-10    | 9,78E-08    |
| 0,379171599 | 4,93E-05    | 8,66E-04    |
| 0,378215444 | 1,78E-10    | 3,01E-08    |
| 0,378107111 | 2,65E-04    | 0,00339641  |
| 0,378066284 | 3,45E-04    | 0,004202067 |
| 0,377882026 | 3,52E-06    | 9,89E-05    |
| 0,377573464 | 5,38E-08    | 3,09E-06    |
| 0,377410177 | 7,92E-06    | 1,94E-04    |
| 0,377230631 | 6,09E-08    | 3,42E-06    |
| 0,377156841 | 1,46E-10    | 2,56E-08    |
| 0,377093975 | 1,35E-05    | 3,02E-04    |
| 0,376524543 | 9,36E-11    | 1,81E-08    |
| 0,376327802 | 3,33E-04    | 0,004079088 |
| 0,375710122 | 1,27E-17    | 1,00E-13    |
| 0,375285452 | 6,85E-10    | 8,91E-08    |
| 0,37519425  | 1,08E-12    | 4,69E-10    |
| 0,375159322 | 2,27E-05    | 4,61E-04    |
| 0,375153831 | 1,86E-05    | 3,91E-04    |
| 0,374961151 | 2,57E-10    | 4,00E-08    |
| 0,374903238 | 3,63E-08    | 2,24E-06    |
| 0,374781356 | 1,01E-09    | 1,19E-07    |
| 0,37456609  | 3,08E-11    | 7,32E-09    |
| 0,374128624 | 1,36E-11    | 3,62E-09    |
| 0,373832685 | 9,70E-04    | 0,009461625 |
| 0,372806142 | 8,04E-14    | 5,41E-11    |
| 0,372722825 | 6,26E-15    | 7,40E-12    |
| 0,372689934 | 3,19E-04    | 0,003961823 |
| 0,371936996 | 2,04E-14    | 1,93E-11    |
| 0,37184544  | 1,57E-05    | 3,40E-04    |
| 0,371229587 | 2,99E-14    | 2,57E-11    |
| 0,371201316 | 2,96E-12    | 1,03E-09    |
| 0,370815745 | 1,10E-07    | 5,53E-06    |
| 0,370171386 | 1,33E-04    | 0,001943025 |
| 0,370108881 | 3,13E-09    | 3,01E-07    |
| 0,368350399 | 6,06E-14    | 4,44E-11    |
| 0,368265382 | 0,003189081 | 0,023817903 |
| 0,367887075 | 1,48E-05    | 3,25E-04    |
| 0,367806579 | 7,33E-11    | 1,48E-08    |
| 0,367093561 | 1,16E-06    | 3,92E-05    |
| 0,367076189 | 1,00E-10    | 1,88E-08    |
| 0,365802493 | 2,05E-12    | 7,51E-10    |
| 0,364715168 | 3,50E-10    | 5,22E-08    |
| 0,36446894  | 6,98E-12    | 2,12E-09    |

# Supplementary\_table\_S2

|             |             |             |
|-------------|-------------|-------------|
| 0,364386082 | 4,56E-05    | 8,13E-04    |
| 0,364347044 | 1,85E-07    | 8,55E-06    |
| 0,364264646 | 1,32E-08    | 9,77E-07    |
| 0,364248226 | 6,25E-11    | 1,30E-08    |
| 0,364010465 | 2,59E-14    | 2,27E-11    |
| 0,364007419 | 1,73E-08    | 1,21E-06    |
| 0,363866448 | 4,72E-10    | 6,66E-08    |
| 0,36369945  | 2,22E-09    | 2,25E-07    |
| 0,363230962 | 0,001280928 | 0,01173391  |
| 0,362702901 | 1,90E-12    | 7,12E-10    |
| 0,362211388 | 8,97E-08    | 4,64E-06    |
| 0,362123915 | 1,61E-16    | 5,95E-13    |
| 0,362083554 | 0,001876638 | 0,015824688 |
| 0,362019978 | 8,77E-06    | 2,11E-04    |
| 0,361718343 | 8,26E-08    | 4,39E-06    |
| 0,36148212  | 1,28E-10    | 2,33E-08    |
| 0,361427054 | 5,19E-07    | 1,98E-05    |
| 0,361426861 | 5,54E-05    | 9,53E-04    |
| 0,361270344 | 1,30E-15    | 2,12E-12    |
| 0,361094596 | 9,29E-05    | 0,001448304 |
| 0,361021149 | 1,84E-12    | 7,02E-10    |
| 0,360966736 | 6,72E-04    | 0,007116311 |
| 0,360654588 | 4,28E-07    | 1,69E-05    |
| 0,36029623  | 8,14E-06    | 1,98E-04    |
| 0,359761578 | 0,001662167 | 0,01441428  |
| 0,359712787 | 1,10E-12    | 4,74E-10    |
| 0,359697985 | 2,42E-07    | 1,06E-05    |
| 0,359481735 | 9,55E-07    | 3,33E-05    |
| 0,359354644 | 6,44E-04    | 0,006893717 |
| 0,359260741 | 9,49E-04    | 0,009320699 |
| 0,358885404 | 6,78E-09    | 5,65E-07    |
| 0,358193223 | 5,06E-10    | 7,07E-08    |
| 0,357758507 | 2,09E-04    | 0,002806832 |
| 0,357419305 | 9,31E-06    | 2,21E-04    |
| 0,357054288 | 3,44E-09    | 3,26E-07    |
| 0,356544027 | 7,66E-14    | 5,25E-11    |
| 0,356300692 | 0,001487176 | 0,01318674  |
| 0,35567229  | 9,88E-05    | 0,001521234 |
| 0,355621751 | 7,37E-14    | 5,13E-11    |
| 0,355565824 | 6,42E-09    | 5,42E-07    |
| 0,35545704  | 6,52E-12    | 2,02E-09    |
| 0,355113789 | 1,77E-07    | 8,24E-06    |
| 0,354971015 | 2,45E-10    | 3,88E-08    |
| 0,354638749 | 5,16E-08    | 2,99E-06    |
| 0,353999038 | 6,69E-07    | 2,45E-05    |
| 0,353818147 | 1,67E-08    | 1,17E-06    |
| 0,353641607 | 9,64E-08    | 4,93E-06    |
| 0,352568994 | 0,008177286 | 0,048312138 |
| 0,35246289  | 0,003971826 | 0,028061919 |
| 0,352360953 | 0,008428882 | 0,049408611 |
| 0,352291923 | 3,67E-09    | 3,44E-07    |
| 0,352054515 | 1,22E-06    | 4,09E-05    |
| 0,351968344 | 1,40E-10    | 2,47E-08    |

# Supplementary\_table\_S2

|             |             |             |
|-------------|-------------|-------------|
| 0,35148768  | 5,96E-06    | 1,53E-04    |
| 0,350762283 | 1,21E-06    | 4,07E-05    |
| 0,350378502 | 7,23E-06    | 1,80E-04    |
| 0,350041982 | 3,78E-05    | 6,98E-04    |
| 0,34982894  | 0,001961256 | 0,016392176 |
| 0,349646272 | 2,00E-07    | 9,09E-06    |
| 0,349279113 | 2,13E-05    | 4,37E-04    |
| 0,349259502 | 7,87E-10    | 9,85E-08    |
| 0,349079941 | 1,14E-11    | 3,15E-09    |
| 0,348966245 | 8,32E-06    | 2,02E-04    |
| 0,348365814 | 3,14E-05    | 6,00E-04    |
| 0,348050807 | 5,81E-08    | 3,30E-06    |
| 0,347962563 | 6,32E-09    | 5,35E-07    |
| 0,347941088 | 5,79E-05    | 9,85E-04    |
| 0,347811059 | 6,55E-04    | 0,006975354 |
| 0,347164116 | 8,13E-15    | 9,38E-12    |
| 0,346965589 | 2,75E-06    | 8,09E-05    |
| 0,346653144 | 5,74E-14    | 4,31E-11    |
| 0,346090216 | 0,003205228 | 0,023894299 |
| 0,346013668 | 0,006528237 | 0,040978346 |
| 0,345893563 | 2,52E-06    | 7,54E-05    |
| 0,345844019 | 1,68E-15    | 2,49E-12    |
| 0,345791066 | 9,06E-05    | 0,001420442 |
| 0,345742579 | 1,53E-12    | 6,00E-10    |
| 0,345621489 | 1,16E-10    | 2,14E-08    |
| 0,345318596 | 3,41E-05    | 6,41E-04    |
| 0,344982364 | 8,82E-06    | 2,12E-04    |
| 0,344757026 | 5,21E-07    | 1,98E-05    |
| 0,344494248 | 2,93E-11    | 7,05E-09    |
| 0,344286545 | 3,37E-06    | 9,53E-05    |
| 0,343888479 | 9,44E-05    | 0,001466418 |
| 0,342834456 | 1,21E-08    | 9,12E-07    |
| 0,342494527 | 0,004750139 | 0,03224657  |
| 0,342404121 | 2,22E-07    | 9,95E-06    |
| 0,342173223 | 5,62E-09    | 4,82E-07    |
| 0,342083999 | 1,11E-09    | 1,29E-07    |
| 0,341984929 | 3,81E-07    | 1,54E-05    |
| 0,341964616 | 6,06E-08    | 3,41E-06    |
| 0,34154759  | 5,27E-10    | 7,30E-08    |
| 0,341335159 | 1,02E-10    | 1,92E-08    |
| 0,341063618 | 1,45E-04    | 0,002086458 |
| 0,340811912 | 1,58E-13    | 8,71E-11    |
| 0,340710944 | 0,004830392 | 0,032622899 |
| 0,340583368 | 9,61E-09    | 7,53E-07    |
| 0,340491747 | 3,25E-05    | 6,18E-04    |
| 0,340416031 | 2,55E-04    | 0,003293984 |
| 0,340339484 | 1,46E-05    | 3,20E-04    |
| 0,340273273 | 5,39E-10    | 7,37E-08    |
| 0,339512855 | 3,84E-14    | 3,16E-11    |
| 0,339463222 | 0,003928833 | 0,027812144 |
| 0,339398101 | 0,003431267 | 0,025124222 |
| 0,338478972 | 1,02E-11    | 2,85E-09    |
| 0,338434433 | 2,20E-12    | 8,00E-10    |



# Supplementary\_table\_S2

|             |             |             |
|-------------|-------------|-------------|
| 0,338362107 | 1,66E-05    | 3,56E-04    |
| 0,338227835 | 0,001982557 | 0,016538081 |
| 0,338188886 | 1,04E-07    | 5,29E-06    |
| 0,337944589 | 8,89E-09    | 7,06E-07    |
| 0,337881585 | 8,57E-07    | 3,03E-05    |
| 0,337301971 | 3,36E-11    | 7,88E-09    |
| 0,337163077 | 3,34E-04    | 0,004094603 |
| 0,336939262 | 2,01E-08    | 1,37E-06    |
| 0,336825564 | 2,98E-07    | 1,25E-05    |
| 0,336698121 | 8,03E-13    | 3,73E-10    |
| 0,336204858 | 1,22E-08    | 9,17E-07    |
| 0,336025626 | 1,53E-12    | 6,00E-10    |
| 0,335957444 | 9,64E-09    | 7,53E-07    |
| 0,335935083 | 1,13E-09    | 1,30E-07    |
| 0,335818769 | 8,57E-09    | 6,83E-07    |
| 0,335690274 | 2,59E-06    | 7,70E-05    |
| 0,335283598 | 2,92E-06    | 8,49E-05    |
| 0,335250703 | 2,18E-13    | 1,15E-10    |
| 0,335088891 | 3,82E-08    | 2,35E-06    |
| 0,334942947 | 9,10E-12    | 2,56E-09    |
| 0,33463419  | 3,81E-09    | 3,52E-07    |
| 0,334630981 | 4,80E-11    | 1,06E-08    |
| 0,334461309 | 1,53E-08    | 1,10E-06    |
| 0,334276932 | 6,36E-06    | 1,62E-04    |
| 0,334263371 | 4,44E-04    | 0,005125458 |
| 0,334252332 | 2,15E-09    | 2,20E-07    |
| 0,334082974 | 2,18E-07    | 9,83E-06    |
| 0,333980136 | 9,73E-16    | 1,81E-12    |
| 0,333203778 | 8,01E-05    | 0,001287923 |
| 0,33293478  | 6,26E-09    | 5,31E-07    |
| 0,332674727 | 4,55E-09    | 4,08E-07    |
| 0,332465739 | 7,16E-04    | 0,007478262 |
| 0,332351864 | 4,16E-18    | 3,94E-14    |
| 0,332294118 | 8,37E-07    | 2,98E-05    |
| 0,332157629 | 6,19E-08    | 3,46E-06    |
| 0,331864223 | 5,69E-05    | 9,73E-04    |
| 0,331802572 | 1,26E-06    | 4,22E-05    |
| 0,331623436 | 2,67E-07    | 1,15E-05    |
| 0,331546214 | 1,04E-10    | 1,95E-08    |
| 0,331217835 | 7,60E-08    | 4,10E-06    |
| 0,330949598 | 1,09E-05    | 2,52E-04    |
| 0,330875982 | 9,87E-05    | 0,001520237 |
| 0,330706465 | 1,66E-04    | 0,002333244 |
| 0,330599918 | 5,41E-05    | 9,35E-04    |
| 0,330419158 | 0,00403566  | 0,028398447 |
| 0,330255007 | 6,03E-08    | 3,40E-06    |
| 0,330155673 | 3,48E-08    | 2,16E-06    |
| 0,329953841 | 1,57E-06    | 5,05E-05    |
| 0,32987231  | 8,94E-10    | 1,08E-07    |
| 0,329609534 | 0,002703399 | 0,021031307 |
| 0,329450047 | 3,92E-08    | 2,39E-06    |
| 0,329418027 | 9,93E-11    | 1,87E-08    |
| 0,32918432  | 1,50E-09    | 1,64E-07    |

# Supplementary\_table\_S2

|             |             |             |
|-------------|-------------|-------------|
| 0,328901102 | 7,24E-08    | 3,93E-06    |
| 0,328824149 | 1,35E-04    | 0,001965281 |
| 0,32832459  | 1,42E-08    | 1,04E-06    |
| 0,327986668 | 4,73E-11    | 1,05E-08    |
| 0,327875762 | 5,00E-12    | 1,59E-09    |
| 0,327744232 | 1,33E-09    | 1,49E-07    |
| 0,327288676 | 6,15E-11    | 1,29E-08    |
| 0,327085762 | 2,92E-06    | 8,49E-05    |
| 0,327019297 | 1,69E-04    | 0,002374079 |
| 0,32680455  | 9,05E-08    | 4,67E-06    |
| 0,326759689 | 1,08E-09    | 1,28E-07    |
| 0,326725201 | 1,96E-06    | 6,12E-05    |
| 0,326687352 | 6,59E-13    | 3,12E-10    |
| 0,325928007 | 2,19E-04    | 0,002906282 |
| 0,325717041 | 5,10E-09    | 4,47E-07    |
| 0,325704674 | 4,66E-08    | 2,74E-06    |
| 0,325154032 | 3,52E-15    | 4,50E-12    |
| 0,324955328 | 9,04E-05    | 0,001418961 |
| 0,324751145 | 0,001036238 | 0,009948848 |
| 0,324741872 | 4,83E-08    | 2,82E-06    |
| 0,324604964 | 1,16E-09    | 1,33E-07    |
| 0,324556852 | 4,55E-08    | 2,69E-06    |
| 0,324523822 | 7,31E-07    | 2,66E-05    |
| 0,32433116  | 3,58E-05    | 6,68E-04    |
| 0,324312032 | 7,72E-09    | 6,27E-07    |
| 0,324061982 | 4,03E-08    | 2,43E-06    |
| 0,324060797 | 2,83E-08    | 1,81E-06    |
| 0,32397941  | 6,58E-06    | 1,66E-04    |
| 0,323937666 | 3,10E-12    | 1,05E-09    |
| 0,323891944 | 4,39E-08    | 2,61E-06    |
| 0,323882576 | 3,70E-12    | 1,23E-09    |
| 0,323856833 | 1,15E-09    | 1,32E-07    |
| 0,323618547 | 2,69E-08    | 1,75E-06    |
| 0,323146447 | 0,002817963 | 0,021711896 |
| 0,322480217 | 3,72E-10    | 5,50E-08    |
| 0,322186157 | 1,42E-08    | 1,04E-06    |
| 0,322039491 | 1,61E-09    | 1,73E-07    |
| 0,786771064 | 3,76E-05    | 0,007904345 |
| 0,555674328 | 4,47E-04    | 0,032977597 |
| 0,538541484 | 8,10E-05    | 0,012443541 |
| 0,527119762 | 6,15E-04    | 0,03854472  |
| 0,481715122 | 7,19E-09    | 4,68E-05    |
| 0,476966368 | 1,68E-06    | 0,001295115 |
| 0,469226488 | 8,04E-07    | 8,51E-04    |
| 0,46232366  | 5,09E-05    | 0,009373727 |
| 0,45597949  | 1,40E-04    | 0,01714243  |
| 0,454196874 | 3,69E-04    | 0,029172609 |
| 0,45156614  | 3,42E-04    | 0,028061639 |
| 0,433496782 | 1,82E-07    | 4,54E-04    |
| 0,432513422 | 8,42E-05    | 0,012691785 |
| 0,428384634 | 8,33E-08    | 2,93E-04    |
| 0,4281815   | 3,63E-05    | 0,007762381 |
| 0,423837436 | 5,03E-04    | 0,034476343 |

# Supplementary\_table\_S2

|             |          |             |
|-------------|----------|-------------|
| 0,421276002 | 2,27E-04 | 0,022213247 |
| 0,420514566 | 5,93E-04 | 0,037986282 |
| 0,419881197 | 1,29E-05 | 0,004226654 |
| 0,417947823 | 3,65E-22 | 1,73E-17    |
| 0,414821932 | 2,43E-07 | 4,99E-04    |
| 0,410000121 | 1,27E-04 | 0,01617063  |
| 0,408335274 | 6,79E-06 | 0,002869788 |
| 0,403883355 | 3,09E-05 | 0,007174976 |
| 0,403296023 | 5,67E-04 | 0,037379805 |
| 0,400267573 | 2,62E-07 | 5,15E-04    |
| 0,398314695 | 6,36E-07 | 7,92E-04    |
| 0,392301414 | 7,25E-07 | 8,17E-04    |
| 0,390802539 | 4,00E-05 | 0,008200378 |
| 0,387562495 | 1,70E-05 | 0,005129671 |
| 0,387117789 | 8,68E-04 | 0,047180042 |
| 0,385335214 | 1,06E-06 | 0,001047269 |
| 0,384767362 | 2,69E-06 | 0,001702166 |
| 0,382353503 | 5,84E-04 | 0,037844749 |
| 0,381915221 | 8,82E-04 | 0,047580514 |
| 0,379921011 | 2,77E-04 | 0,025001422 |
| 0,379678885 | 7,46E-05 | 0,011806928 |
| 0,379283892 | 9,06E-04 | 0,048323595 |
| 0,379090278 | 7,48E-06 | 0,00309314  |
| 0,374163621 | 1,97E-04 | 0,020474862 |
| 0,369987555 | 8,09E-07 | 8,51E-04    |
| 0,365474167 | 3,42E-04 | 0,028061639 |
| 0,364550724 | 5,78E-09 | 4,56E-05    |
| 0,364293966 | 2,99E-05 | 0,00708452  |
| 0,357537792 | 1,51E-05 | 0,004711049 |
| 0,356139689 | 6,65E-04 | 0,04057153  |
| 0,355706087 | 4,00E-04 | 0,030515241 |
| 0,355536721 | 8,93E-07 | 9,18E-04    |
| 0,355282798 | 3,14E-06 | 0,001751528 |
| 0,353772772 | 1,77E-04 | 0,019439782 |
| 0,353174104 | 1,18E-08 | 6,19E-05    |
| 0,351671456 | 4,66E-04 | 0,033513331 |
| 0,351055288 | 8,14E-06 | 0,003185469 |
| 0,349425437 | 6,98E-05 | 0,011525206 |
| 0,348658594 | 2,02E-06 | 0,001432517 |
| 0,348070629 | 1,13E-04 | 0,015152552 |
| 0,347970295 | 2,06E-04 | 0,021101618 |
| 0,347362627 | 1,73E-04 | 0,019255853 |
| 0,347138722 | 1,02E-05 | 0,003691091 |
| 0,346873217 | 2,58E-05 | 0,00652458  |
| 0,346482667 | 2,02E-06 | 0,001432517 |
| 0,34586087  | 2,36E-04 | 0,022688356 |
| 0,34536944  | 2,35E-06 | 0,00153752  |
| 0,344567303 | 4,82E-09 | 4,56E-05    |
| 0,344197898 | 6,76E-08 | 2,67E-04    |
| 0,343993725 | 3,11E-06 | 0,001751528 |
| 0,343294645 | 5,31E-04 | 0,035808645 |
| 0,342603526 | 1,60E-06 | 0,001263198 |
| 0,341076455 | 2,72E-07 | 5,15E-04    |

# Supplementary\_table\_S2

|             |          |             |
|-------------|----------|-------------|
| 0,340111621 | 2,24E-04 | 0,022119735 |
| 0,339033064 | 6,52E-04 | 0,040084405 |
| 0,338904952 | 2,87E-05 | 0,007056298 |
| 0,336480406 | 8,70E-04 | 0,047180042 |
| 0,336290196 | 3,15E-06 | 0,001751528 |
| 0,333176113 | 1,76E-04 | 0,019439782 |
| 0,331344303 | 3,78E-09 | 4,56E-05    |
| 0,330533954 | 3,22E-09 | 4,56E-05    |
| 0,329861216 | 3,99E-06 | 0,002073673 |
| 0,32968707  | 3,17E-05 | 0,00721118  |
| 0,328620362 | 5,10E-05 | 0,009373727 |
| 0,326854199 | 4,77E-04 | 0,03378353  |
| 0,324769306 | 6,41E-05 | 0,011065702 |
