# Supplementary material for: The Impact of Cand1 in Prostate Cancer
Source: MDPI journal article supplement (doi:10.3390/cancers12020428), 2020-02-12
Supplement: s1 [file s1]

## Supplementary\_Table\_S5

### GO term

GO:0018342~protein prenylation  
GO:0008318~protein prenyltransferase activity  
GO:0061684~chaperone-mediated autophagy  
GO:0090168~Golgi reassembly  
GO:0006616~SRP-dependent cotranslational protein targeting to membrane, translocation  
GO:0007253~cytoplasmic sequestering of NF-kappaB  
GO:0008312~7S RNA binding  
GO:0051683~establishment of Golgi localization  
GO:0043312~neutrophil degranulation  
GO:1903071~positive regulation of ER-associated ubiquitin-dependent protein catabolic process  
GO:1901409~positive regulation of phosphorylation of RNA polymerase II C-terminal domain  
GO:0045047~protein targeting to ER  
GO:0045899~positive regulation of RNA polymerase II transcriptional preinitiation complex assembly  
GO:0033673~negative regulation of kinase activity  
GO:1904903~ESCRT III complex disassembly  
GO:0048280~vesicle fusion with Golgi apparatus  
GO:0001893~maternal placenta development  
GO:0017025~TBP-class protein binding  
GO:0090161~Golgi ribbon formation  
GO:0045737~positive regulation of cyclin-dependent protein serine/threonine kinase activity  
GO:0008334~histone mRNA metabolic process  
GO:0060394~negative regulation of pathway-restricted SMAD protein phosphorylation  
GO:0045717~negative regulation of fatty acid biosynthetic process  
GO:0003724~RNA helicase activity  
GO:0043024~ribosomal small subunit binding  
GO:0006312~mitotic recombination  
GO:1901673~regulation of mitotic spindle assembly  
GO:0016538~cyclin-dependent protein serine/threonine kinase regulator activity  
GO:0006839~mitochondrial transport  
GO:0006301~postreplication repair  
GO:0010633~negative regulation of epithelial cell migration  
GO:0032781~positive regulation of ATPase activity  
GO:0046328~regulation of JNK cascade  
GO:0031396~regulation of protein ubiquitination  
GO:0001671~ATPase activator activity  
GO:0070979~protein K11-linked ubiquitination  
GO:0000920~cell separation after cytokinesis  
GO:0010971~positive regulation of G2/M transition of mitotic cell cycle  
GO:0061631~ubiquitin conjugating enzyme activity  
GO:0010824~regulation of centrosome duplication  
GO:0006099~tricarboxylic acid cycle  
GO:1990841~promoter-specific chromatin binding  
GO:0005086~ARF guanyl-nucleotide exchange factor activity  
GO:0001205~transcriptional activator activity, RNA polymerase II distal enhancer sequence-specific binding  
GO:0097352~autophagosome maturation  
GO:0051020~GTPase binding  
GO:0003785~actin monomer binding  
GO:0006506~GPI anchor biosynthetic process  
GO:0045930~negative regulation of mitotic cell cycle  
GO:0006997~nucleus organization  
GO:0050999~regulation of nitric-oxide synthase activity

## Supplementary\_Table\_S5

GO:0072332~intrinsic apoptotic signaling pathway by p53 class mediator  
GO:0006891~intra-Golgi vesicle-mediated transport  
GO:0043001~Golgi to plasma membrane protein transport  
GO:0000387~spliceosomal snRNP assembly  
GO:0022400~regulation of rhodopsin mediated signaling pathway  
GO:0043021~ribonucleoprotein complex binding  
GO:0005080~protein kinase C binding  
GO:0000149~SNARE binding  
GO:0019058~viral life cycle  
GO:0036258~multivesicular body assembly  
GO:0070936~protein K48-linked ubiquitination  
GO:0002479~antigen processing and presentation of exogenous peptide antigen via MHC class I, TAP-dependent  
GO:0006890~retrograde vesicle-mediated transport, Golgi to ER  
GO:0038061~NIK/NF-kappaB signaling  
GO:0006521~regulation of cellular amino acid metabolic process  
GO:0048487~beta-tubulin binding  
GO:0040008~regulation of growth  
GO:0051436~negative regulation of ubiquitin-protein ligase activity involved in mitotic cell cycle  
GO:0051287~NAD binding  
GO:0007080~mitotic metaphase plate congression  
GO:0005484~SNAP receptor activity  
GO:0051437~positive regulation of ubiquitin-protein ligase activity involved in regulation of mitotic cell cycle transition  
GO:0038128~ERBB2 signaling pathway  
GO:0006695~cholesterol biosynthetic process  
GO:0052689~carboxylic ester hydrolase activity  
GO:0050681~androgen receptor binding  
GO:0008219~cell death  
GO:0008333~endosome to lysosome transport  
GO:0000079~regulation of cyclin-dependent protein serine/threonine kinase activity  
GO:0051087~chaperone binding  
GO:0003743~translation initiation factor activity  
GO:0031145~anaphase-promoting complex-dependent catabolic process  
GO:0008654~phospholipid biosynthetic process  
GO:0018279~protein N-linked glycosylation via asparagine  
GO:0043161~proteasome-mediated ubiquitin-dependent protein catabolic process  
GO:0031072~heat shock protein binding  
GO:0006813~potassium ion transport  
GO:0030163~protein catabolic process  
GO:0044255~cellular lipid metabolic process  
GO:0000045~autophagosome assembly  
GO:0030971~receptor tyrosine kinase binding  
GO:0006986~response to unfolded protein  
GO:0004004~ATP-dependent RNA helicase activity  
GO:0032436~positive regulation of proteasomal ubiquitin-dependent protein catabolic process  
GO:0006368~transcription elongation from RNA polymerase II promoter  
GO:0034613~cellular protein localization  
GO:0016197~endosomal transport  
GO:0030968~endoplasmic reticulum unfolded protein response  
GO:0006413~translational initiation  
GO:0000209~protein polyubiquitination  
GO:0043154~negative regulation of cysteine-type endopeptidase activity involved in apoptotic process  
GO:0042795~snRNA transcription from RNA polymerase II promoter  
GO:0006614~SRP-dependent cotranslational protein targeting to membrane

## Supplementary\_Table\_S5

GO:0010467~gene expression  
GO:0003729~mRNA binding  
GO:0042826~histone deacetylase binding  
GO:0051865~protein autoubiquitination  
GO:0042542~response to hydrogen peroxide  
GO:0043488~regulation of mRNA stability  
GO:0019003~GDP binding  
GO:0006464~cellular protein modification process  
GO:0045727~positive regulation of translation  
GO:0006888~ER to Golgi vesicle-mediated transport  
GO:0046718~viral entry into host cell  
GO:0098609~cell-cell adhesion  
GO:0050821~protein stabilization  
GO:0016049~cell growth  
GO:0006749~glutathione metabolic process  
GO:0048306~calcium-dependent protein binding  
GO:0098641~cadherin binding involved in cell-cell adhesion  
GO:0016569~covalent chromatin modification  
GO:0016887~ATPase activity  
GO:0051289~protein homotetramerization  
GO:0030433~ER-associated ubiquitin-dependent protein catabolic process  
GO:0016192~vesicle-mediated transport  
GO:0006950~response to stress  
GO:0019903~protein phosphatase binding  
GO:0060071~Wnt signaling pathway, planar cell polarity pathway  
GO:0006977~DNA damage response, signal transduction by p53 class mediator resulting in cell cycle arrest  
GO:0050660~flavin adenine dinucleotide binding  
GO:0016740~transferase activity  
GO:0047485~protein N-terminus binding  
GO:0032981~mitochondrial respiratory chain complex I assembly  
GO:0072659~protein localization to plasma membrane  
GO:0030512~negative regulation of transforming growth factor beta receptor signaling pathway  
GO:0034599~cellular response to oxidative stress  
GO:0031398~positive regulation of protein ubiquitination  
GO:0006396~RNA processing  
GO:0015031~protein transport  
GO:0006006~glucose metabolic process  
GO:0001618~virus receptor activity  
GO:0008203~cholesterol metabolic process  
GO:0003713~transcription coactivator activity  
GO:0035690~cellular response to drug  
GO:0006810~transport  
GO:0033138~positive regulation of peptidyl-serine phosphorylation  
GO:0098869~cellular oxidant detoxification  
GO:0002223~stimulatory C-type lectin receptor signaling pathway  
GO:0051082~unfolded protein binding  
GO:0051117~ATPase binding  
GO:0048010~vascular endothelial growth factor receptor signaling pathway  
GO:0019900~kinase binding  
GO:0044822~poly(A) RNA binding  
GO:0000398~mRNA splicing, via spliceosome  
GO:0007030~Golgi organization  
GO:0019905~syntaxin binding

## Supplementary\_Table\_S5

GO:0043086~negative regulation of catalytic activity  
GO:1900034~regulation of cellular response to heat  
GO:0006367~transcription initiation from RNA polymerase II promoter  
GO:0016236~macroautophagy  
GO:0060021~palate development  
GO:0045454~cell redox homeostasis  
GO:0016925~protein sumoylation  
GO:0003690~double-stranded DNA binding  
GO:0033209~tumor necrosis factor-mediated signaling pathway  
GO:0000287~magnesium ion binding  
GO:0090263~positive regulation of canonical Wnt signaling pathway  
GO:0035264~multicellular organism growth  
GO:0008543~fibroblast growth factor receptor signaling pathway  
GO:0051726~regulation of cell cycle  
GO:0043066~negative regulation of apoptotic process  
GO:0006919~activation of cysteine-type endopeptidase activity involved in apoptotic process  
GO:0030307~positive regulation of cell growth  
GO:0030036~actin cytoskeleton organization  
GO:0007049~cell cycle  
GO:0009055~electron carrier activity  
GO:0008022~protein C-terminus binding  
GO:0006914~autophagy  
GO:0006457~protein folding  
GO:0003697~single-stranded DNA binding  
GO:0061630~ubiquitin protein ligase activity  
GO:0006511~ubiquitin-dependent protein catabolic process  
GO:0004842~ubiquitin-protein transferase activity  
GO:0010629~negative regulation of gene expression  
GO:0006897~endocytosis  
GO:0030336~negative regulation of cell migration  
GO:0071456~cellular response to hypoxia  
GO:0000166~nucleotide binding  
GO:0042802~identical protein binding  
GO:0003714~transcription corepressor activity  
GO:0050852~T cell receptor signaling pathway  
GO:0019904~protein domain specific binding  
GO:0016567~protein ubiquitination  
GO:0007062~sister chromatid cohesion  
GO:0002576~platelet degranulation  
GO:0044212~transcription regulatory region DNA binding  
GO:0001649~osteoblast differentiation  
GO:0006629~lipid metabolic process  
GO:0010628~positive regulation of gene expression  
GO:0001764~neuron migration  
GO:0004872~receptor activity  
GO:0003723~RNA binding  
GO:0090090~negative regulation of canonical Wnt signaling pathway  
GO:0006979~response to oxidative stress  
GO:0008134~transcription factor binding  
GO:0006357~regulation of transcription from RNA polymerase II promoter  
GO:0031625~ubiquitin protein ligase binding  
GO:0008152~metabolic process  
GO:0019083~viral transcription

## Supplementary\_Table\_S5

GO:0003924~GTPase activity  
GO:0016477~cell migration  
GO:0005975~carbohydrate metabolic process  
GO:0006281~DNA repair  
GO:0042393~histone binding  
GO:0038095~Fc-epsilon receptor signaling pathway  
GO:0000184~nuclear-transcribed mRNA catabolic process, nonsense-mediated decay  
GO:0003824~catalytic activity  
GO:0050900~leukocyte migration  
GO:0030335~positive regulation of cell migration  
GO:0016787~hydrolase activity  
GO:0006412~translation  
GO:0006366~transcription from RNA polymerase II promoter  
GO:0000165~MAPK cascade  
GO:0019221~cytokine-mediated signaling pathway  
GO:0045944~positive regulation of transcription from RNA polymerase II promoter  
GO:0007050~cell cycle arrest  
GO:0042803~protein homodimerization activity  
GO:0003735~structural constituent of ribosome  
GO:0000122~negative regulation of transcription from RNA polymerase II promoter  
GO:0008289~lipid binding  
GO:0005515~protein binding  
GO:0005525~GTP binding  
GO:0016032~viral process  
GO:0003682~chromatin binding  
GO:0042787~protein ubiquitination involved in ubiquitin-dependent protein catabolic process  
GO:0008284~positive regulation of cell proliferation  
GO:0016301~kinase activity  
GO:0006886~intracellular protein transport  
GO:0019899~enzyme binding  
GO:0007264~small GTPase mediated signal transduction  
GO:0007067~mitotic nuclear division  
GO:0008380~RNA splicing  
GO:0045892~negative regulation of transcription, DNA-templated  
GO:0005524~ATP binding  
GO:0005125~cytokine activity  
GO:0051301~cell division  
GO:0006397~mRNA processing  
GO:0046982~protein heterodimerization activity  
GO:0019901~protein kinase binding  
GO:0004674~protein serine/threonine kinase activity  
GO:0007507~heart development  
GO:0005516~calmodulin binding  
GO:0016055~Wnt signaling pathway  
GO:0006915~apoptotic process  
GO:0007420~brain development  
GO:0016491~oxidoreductase activity  
GO:0005215~transporter activity  
GO:0030198~extracellular matrix organization  
GO:0055114~oxidation-reduction process  
GO:0006508~proteolysis  
GO:0008017~microtubule binding  
GO:0042493~response to drug

## Supplementary\_Table\_S5

GO:0034220~ion transmembrane transport  
GO:0003676~nucleic acid binding  
GO:0006364~rRNA processing  
GO:0001525~angiogenesis  
GO:0001077~transcriptional activator activity, RNA polymerase II core promoter proximal region sequence-specific binding  
GO:0000978~RNA polymerase II core promoter proximal region sequence-specific DNA binding  
GO:0007283~spermatogenesis  
GO:0045893~positive regulation of transcription, DNA-templated  
GO:0016874~ligase activity  
GO:0006351~transcription, DNA-templated  
GO:0007165~signal transduction  
GO:0006468~protein phosphorylation  
GO:0003677~DNA binding  
GO:0046872~metal ion binding  
GO:0005102~receptor binding  
GO:0008283~cell proliferation  
GO:0008285~negative regulation of cell proliferation  
GO:0008270~zinc ion binding  
GO:0006355~regulation of transcription, DNA-templated  
GO:0007275~multicellular organism development  
GO:0043547~positive regulation of GTPase activity  
GO:0003700~transcription factor activity, sequence-specific DNA binding

# Supplementary\_Table\_S5

| Fold enrichment | P <sub>EA</sub> | P <sub>FDR</sub> |
|-----------------|-----------------|------------------|
| 106,278481      | 0,018612516     | 0,739026246      |
| 73,07792208     | 0,026946221     | 0,623389723      |
| 70,85232068     | 0,027789278     | 0,779376485      |
| 53,13924051     | 0,036880771     | 0,800531507      |
| 35,42616034     | 0,054811094     | 0,844362476      |
| 35,42616034     | 0,054811094     | 0,844362476      |
| 31,31910946     | 0,061755544     | 0,753990346      |
| 30,36528029     | 0,063651476     | 0,857128746      |
| 30,36528029     | 0,063651476     | 0,857128746      |
| 26,56962025     | 0,072409696     | 0,866728244      |
| 26,56962025     | 0,072409696     | 0,866728244      |
| 23,61744023     | 0,081086512     | 0,881634703      |
| 23,61744023     | 0,081086512     | 0,881634703      |
| 23,61744023     | 0,081086512     | 0,881634703      |
| 21,2556962      | 0,089682676     | 0,880155928      |
| 21,2556962      | 0,089682676     | 0,880155928      |
| 21,2556962      | 0,089682676     | 0,880155928      |
| 20,87940631     | 8,61E-04        | 0,078861042      |
| 19,32336018     | 0,098198932     | 0,89709502       |
| 17,71308017     | 0,001404891     | 0,260337274      |
| 17,71308017     | 0,10663602      | 0,910965158      |
| 17,71308017     | 0,10663602      | 0,910965158      |
| 17,71308017     | 0,10663602      | 0,910965158      |
| 16,86413586     | 0,111663133     | 0,831748535      |
| 16,86413586     | 0,111663133     | 0,831748535      |
| 16,35053554     | 0,11499467      | 0,922420742      |
| 15,18264014     | 0,123275607     | 0,918606526      |
| 14,61558442     | 0,127705714     | 0,830714656      |
| 14,17046414     | 0,131479548     | 0,919518996      |
| 14,17046414     | 0,131479548     | 0,919518996      |
| 14,17046414     | 0,131479548     | 0,919518996      |
| 13,71335239     | 0,002974333     | 0,346859731      |
| 13,28481013     | 0,139607206     | 0,920316372      |
| 13,28481013     | 0,139607206     | 0,920316372      |
| 12,17965368     | 0,151231464     | 0,869830248      |
| 11,80872011     | 0,026164964     | 0,780535332      |
| 11,80872011     | 0,155636482     | 0,935343974      |
| 11,80872011     | 0,155636482     | 0,935343974      |
| 11,33967756     | 0,028235831     | 0,559200369      |
| 11,18720853     | 0,163539491     | 0,941420691      |
| 10,99432562     | 0,02990052      | 0,764725091      |
| 10,96168831     | 0,166564        | 0,885958991      |
| 8,769350649     | 0,203702068     | 0,926157783      |
| 8,769350649     | 0,203702068     | 0,926157783      |
| 8,502278481     | 0,209437535     | 0,969085693      |
| 8,432067932     | 0,210929974     | 0,926163516      |
| 8,432067932     | 0,210929974     | 0,926163516      |
| 8,17526777      | 0,21684007      | 0,969656787      |
| 8,17526777      | 0,21684007      | 0,969656787      |
| 8,17526777      | 0,21684007      | 0,969656787      |
| 8,17526777      | 0,21684007      | 0,969656787      |

# Supplementary\_Table\_S5

|             |             |             |
|-------------|-------------|-------------|
| 7,872480075 | 0,224173728 | 0,971850273 |
| 7,872480075 | 0,224173728 | 0,971850273 |
| 7,872480075 | 0,224173728 | 0,971850273 |
| 7,591320072 | 0,231439146 | 0,970665805 |
| 7,329550415 | 0,238636954 | 0,969544338 |
| 7,307792208 | 0,239195593 | 0,919712514 |
| 7,14892716  | 0,06518869  | 0,747691263 |
| 7,14892716  | 0,06518869  | 0,747691263 |
| 6,856676194 | 0,252832236 | 0,973332524 |
| 6,856676194 | 0,252832236 | 0,973332524 |
| 6,783732831 | 0,07145047  | 0,879987874 |
| 6,747840064 | 0,0211565   | 0,756176677 |
| 6,480395184 | 0,007313684 | 0,544916821 |
| 6,441120061 | 0,023892766 | 0,772831191 |
| 6,251675354 | 0,082289108 | 0,878167982 |
| 6,08982684  | 0,27971869  | 0,915371596 |
| 6,015763076 | 0,087886133 | 0,88835587  |
| 5,987520057 | 0,028858585 | 0,771892774 |
| 5,769309638 | 0,292744016 | 0,921133005 |
| 5,744782757 | 0,293859303 | 0,985074628 |
| 5,621378621 | 0,299168653 | 0,91623547  |
| 5,593604264 | 0,034328262 | 0,793493786 |
| 5,593604264 | 0,300476079 | 0,985006649 |
| 5,593604264 | 0,300476079 | 0,985006649 |
| 5,480844156 | 0,305535308 | 0,911531329 |
| 5,480844156 | 0,305535308 | 0,911531329 |
| 5,450178513 | 0,307031245 | 0,984942108 |
| 5,450178513 | 0,307031245 | 0,984942108 |
| 5,450178513 | 0,307031245 | 0,984942108 |
| 5,413179413 | 0,037287938 | 0,627688254 |
| 5,390994252 | 0,105723623 | 0,830589562 |
| 5,381188912 | 0,037849499 | 0,793292    |
| 5,313924051 | 0,313525372 | 0,984880757 |
| 5,313924051 | 0,313525372 | 0,984880757 |
| 5,235393153 | 1,25E-04    | 0,101849013 |
| 5,219851577 | 0,318096744 | 0,912256331 |
| 5,184316147 | 0,041548173 | 0,794651434 |
| 5,184316147 | 0,319959022 | 0,985615793 |
| 5,184316147 | 0,319959022 | 0,985615793 |
| 5,184316147 | 0,319959022 | 0,985615793 |
| 5,09845968  | 0,324292551 | 0,912593594 |
| 5,060880048 | 0,326332757 | 0,985543031 |
| 5,059240759 | 0,117450955 | 0,817604212 |
| 4,981803797 | 0,120483326 | 0,922825318 |
| 4,943185163 | 0,046752019 | 0,819444501 |
| 4,943185163 | 0,332647131 | 0,986213002 |
| 4,830840046 | 0,126694496 | 0,920086219 |
| 4,723488045 | 0,345099986 | 0,987418375 |
| 4,654532015 | 0,009326632 | 0,590701766 |
| 4,620803522 | 0,001743331 | 0,258749513 |
| 4,620803522 | 0,136149341 | 0,922904661 |
| 4,554792043 | 0,139335352 | 0,923835809 |
| 4,522488554 | 0,058070197 | 0,84009804  |



# Supplementary\_Table\_S5

|             |             |             |
|-------------|-------------|-------------|
| 4,428270042 | 0,36334763  | 0,989515026 |
| 4,384675325 | 0,027045976 | 0,581591641 |
| 4,298701299 | 0,065558649 | 0,725510507 |
| 4,251139241 | 0,375231142 | 0,990331249 |
| 4,167783569 | 0,381089983 | 0,989683898 |
| 4,127319651 | 0,072193095 | 0,874307213 |
| 4,05988456  | 0,38886317  | 0,94682082  |
| 4,048704039 | 0,075522404 | 0,870190593 |
| 4,010508717 | 0,392644384 | 0,990918087 |
| 3,985443038 | 0,017288286 | 0,743410794 |
| 3,985443038 | 0,171995173 | 0,944518723 |
| 3,921715167 | 0,001030723 | 0,357512712 |
| 3,907297096 | 0,038859901 | 0,786852045 |
| 3,795660036 | 0,409575298 | 0,992258803 |
| 3,795660036 | 0,409575298 | 0,992258803 |
| 3,779892521 | 0,4107909   | 0,954383317 |
| 3,779892521 | 0,001328848 | 0,090696009 |
| 3,762070124 | 0,089497641 | 0,886299821 |
| 3,593996168 | 0,025679315 | 0,654543915 |
| 3,542616034 | 0,431422458 | 0,993899522 |
| 3,542616034 | 0,431422458 | 0,993899522 |
| 3,496002665 | 0,054641558 | 0,854630894 |
| 3,484540361 | 0,436757545 | 0,99376537  |
| 3,479901051 | 0,437104405 | 0,962636521 |
| 3,465602642 | 0,212587281 | 0,969058813 |
| 3,428338097 | 0,442042887 | 0,993633896 |
| 3,425527597 | 0,442225289 | 0,96213998  |
| 3,425527597 | 0,216228357 | 0,924283074 |
| 3,39021288  | 0,219556783 | 0,913251379 |
| 3,373920032 | 0,447278946 | 0,99350505  |
| 3,373920032 | 0,447278946 | 0,99350505  |
| 3,321202532 | 0,452466178 | 0,993378783 |
| 3,321202532 | 0,452466178 | 0,993378783 |
| 3,321202532 | 0,452466178 | 0,993378783 |
| 3,28696333  | 0,229776879 | 0,973027614 |
| 3,228713347 | 0,001237598 | 0,298245969 |
| 3,172491971 | 0,467739417 | 0,994218449 |
| 3,131910946 | 0,471993026 | 0,968135963 |
| 3,125837677 | 0,472735824 | 0,994376556 |
| 3,094024927 | 0,025610542 | 0,70965156  |
| 3,080535682 | 0,477685625 | 0,994527528 |
| 3,053979339 | 0,005507456 | 0,491821479 |
| 3,036528029 | 0,482589252 | 0,994409655 |
| 3,036528029 | 0,482589252 | 0,994409655 |
| 3,036528029 | 0,257448036 | 0,973969618 |
| 2,989551358 | 0,263106163 | 0,917489578 |
| 2,962618463 | 0,490955823 | 0,970137342 |
| 2,952180028 | 0,492259693 | 0,99469495  |
| 2,923116883 | 0,495589831 | 0,969655878 |
| 2,912760402 | 2,90E-07    | 4,14E-05    |
| 2,872391379 | 0,057615621 | 0,848286015 |
| 2,872391379 | 0,501750521 | 0,994716892 |
| 2,847191769 | 0,504732486 | 0,970566255 |

# Supplementary\_Table\_S5

|             |             |             |
|-------------|-------------|-------------|
| 2,834092827 | 0,50642962  | 0,994846319 |
| 2,834092827 | 0,50642962  | 0,994846319 |
| 2,796802132 | 0,171032954 | 0,946397956 |
| 2,796802132 | 0,511065054 | 0,994970445 |
| 2,796802132 | 0,511065054 | 0,994970445 |
| 2,760480026 | 0,515657228 | 0,995089557 |
| 2,725089257 | 0,299008792 | 0,98549866  |
| 2,706589707 | 0,522526791 | 0,970511211 |
| 2,70199528  | 0,302461666 | 0,984645513 |
| 2,686688312 | 0,114561422 | 0,824464205 |
| 2,656962025 | 0,309358587 | 0,984680428 |
| 2,656962025 | 0,529178187 | 0,995622074 |
| 2,592158073 | 0,537983117 | 0,995810914 |
| 2,571253573 | 0,323110365 | 0,985569038 |
| 2,569369871 | 0,010561873 | 0,597889479 |
| 2,560927253 | 0,54232403  | 0,99590006  |
| 2,530440024 | 0,546624415 | 0,99598592  |
| 2,452580331 | 0,343605735 | 0,987784275 |
| 2,448812927 | 0,146612151 | 0,926900147 |
| 2,435930736 | 0,56027543  | 0,9787654   |
| 2,409162266 | 0,227178807 | 0,914292265 |
| 2,39725897  | 0,353781627 | 0,988434617 |
| 2,361744023 | 0,237330724 | 0,970462668 |
| 2,357352325 | 0,572187279 | 0,980092855 |
| 2,344746163 | 0,242167874 | 0,916115099 |
| 2,335790791 | 0,243260175 | 0,970311326 |
| 2,332274109 | 0,07920471  | 0,771221495 |
| 2,327266008 | 0,367264305 | 0,989604483 |
| 2,293780166 | 0,375822831 | 0,989901617 |
| 2,237441706 | 0,59135889  | 0,997954791 |
| 2,214135021 | 0,595201296 | 0,997985862 |
| 2,204937304 | 0,097162255 | 0,820857512 |
| 2,195264682 | 0,008202258 | 0,375687273 |
| 2,159938584 | 0,278547815 | 0,925262635 |
| 2,154293534 | 0,405872839 | 0,992216415 |
| 2,108016983 | 0,293178106 | 0,916330639 |
| 2,07228236  | 0,120847005 | 0,918855896 |
| 2,063659825 | 0,621111342 | 0,998579425 |
| 2,063659825 | 0,621111342 | 0,998579425 |
| 2,058533016 | 0,304462857 | 0,915612812 |
| 2,043816943 | 0,624675697 | 0,998596557 |
| 2,030799    | 0,434531252 | 0,993874353 |
| 2,028215287 | 0,230218336 | 0,971657744 |
| 2,024352019 | 0,628206732 | 0,998613227 |
| 2,020587707 | 0,314499307 | 0,914088493 |
| 2,003964956 | 0,061321196 | 0,778696249 |
| 1,956045663 | 0,451850135 | 0,993636699 |
| 1,932336018 | 0,645372846 | 0,998874933 |
| 1,929874703 | 0,257122383 | 0,923917805 |
| 1,927954304 | 0,120143809 | 0,92681698  |
| 1,909701796 | 0,263090649 | 0,923313603 |
| 1,897830018 | 0,467032868 | 0,994437391 |
| 1,897830018 | 0,652016668 | 0,998897103 |

# Supplementary\_Table\_S5

|             |             |             |
|-------------|-------------|-------------|
| 1,873792874 | 0,356349451 | 0,931511797 |
| 1,853694436 | 0,479382908 | 0,99440376  |
| 1,832387604 | 0,490065133 | 0,994768639 |
| 1,808995421 | 0,37667443  | 0,989505548 |
| 1,796998084 | 0,672019156 | 0,990801529 |
| 1,791210354 | 0,49442681  | 0,994620101 |
| 1,786192958 | 0,674310887 | 0,999155963 |
| 1,749205582 | 0,510461044 | 0,970465456 |
| 1,742270181 | 0,683425543 | 0,999216096 |
| 1,732801321 | 0,521015389 | 0,995262399 |
| 1,721731148 | 0,519871414 | 0,971463922 |
| 1,68029219  | 0,422407096 | 0,993329392 |
| 1,657364226 | 0,205235583 | 0,968498908 |
| 1,622572229 | 0,444646312 | 0,993567087 |
| 1,622572229 | 0,709276338 | 0,999484889 |
| 1,516716345 | 0,129469801 | 0,920432665 |
| 1,507496185 | 0,735545645 | 0,999694548 |
| 1,501601139 | 0,217841199 | 0,918701227 |
| 1,481309231 | 0,600288978 | 0,983392549 |
| 1,476090014 | 0,232366716 | 0,969518936 |
| 1,451879247 | 0,748671073 | 0,996455442 |
| 1,434939278 | 8,66E-09    | 2,48E-06    |
| 1,427303166 | 0,460773779 | 0,966523464 |
| 1,421785699 | 0,532073409 | 0,995617007 |
| 1,401750423 | 0,474669005 | 0,966937898 |
| 1,38926119  | 0,763972632 | 0,99983734  |
| 1,368392459 | 0,441810321 | 0,993931954 |
| 1,364525516 | 0,644994466 | 0,988753462 |
| 1,35099764  | 0,650460156 | 0,998921728 |
| 1,316719317 | 0,584141048 | 0,981373294 |
| 1,296079037 | 0,672762374 | 0,999174558 |
| 1,285626786 | 0,677082941 | 0,999157543 |
| 1,280463627 | 0,791350232 | 0,999911922 |
| 1,277897567 | 0,501423812 | 0,994931265 |
| 1,246479607 | 0,279644597 | 0,9207726   |
| 1,245646399 | 0,800280513 | 0,998479539 |
| 1,214611212 | 0,63892489  | 0,998797337 |
| 1,187469062 | 0,815570085 | 0,999954737 |
| 1,178676163 | 0,611417435 | 0,984378362 |
| 1,166137054 | 0,666045833 | 0,990736337 |
| 1,166137054 | 0,666045833 | 0,990736337 |
| 1,161513454 | 0,822444257 | 0,999961225 |
| 1,159967017 | 0,822804104 | 0,998965594 |
| 1,136668246 | 0,829063783 | 0,999966714 |
| 1,124640011 | 0,61535695  | 0,998505686 |
| 1,118720853 | 0,833866967 | 0,999969748 |
| 1,096168831 | 0,839878372 | 0,99915801  |
| 1,085315674 | 0,842802296 | 0,999137456 |
| 1,084474296 | 0,843074668 | 0,999976639 |
| 1,077146767 | 0,653273941 | 0,99886619  |
| 1,06278481  | 0,691601655 | 0,999297799 |
| 1,054008492 | 0,851259574 | 0,999231366 |
| 1,048800799 | 0,780232759 | 0,999887338 |

# Supplementary\_Table\_S5

|             |             |             |
|-------------|-------------|-------------|
| 1,01217601  | 0,862634437 | 0,999988287 |
| 1,001575582 | 0,675499935 | 0,990580655 |
| 0,993256832 | 0,867763837 | 0,999989029 |
| 0,953170233 | 0,878619643 | 0,999992104 |
| 0,928956637 | 0,885122777 | 0,999676823 |
| 0,926339857 | 0,835382115 | 0,99914826  |
| 0,828144008 | 0,878405569 | 0,999992615 |
| 0,82546393  | 0,864199977 | 0,999988169 |
| 0,811976912 | 0,916103883 | 0,999886833 |
| 0,761073521 | 0,931481315 | 0,999999566 |
| 0,732323728 | 0,923620391 | 0,999999344 |
| 0,699200533 | 0,929485493 | 0,999999537 |
| 0,65482009  | 0,972553883 | 0,999997384 |
| 0,635767326 | 0,984991551 | 0,999999636 |
| 0,621058828 | 0,961152936 | 0,999992182 |
| 0,580756727 | 0,969074769 | 0,999999994 |
| 0,536760005 | 0,976822155 | 0,999999998 |
| 0,468848944 | 0,994730883 | 0,999999989 |
| 0,423983302 | 0,998837616 | 1           |
| 0,407978814 | 0,993069737 | 1           |
| 0,376207012 | 0,995479106 | 1           |
| 0,22813087  | 0,999877764 | 1           |

**Gene Symbols**

FNTA, PTAR1  
 FNTA, PTAR1  
 LAMP2, HSP90AA1  
 YWHAZ, PDCD10  
 SRP54, SRP9  
 PSMD10, G3BP2  
 SRP54, SRP9  
 YWHAZ, PDCD10  
 VAMP7, STXBP3  
 NFE2L2, UBQLN1  
 CCNT2, CCNC  
 SRP54, SPCS1  
 PSMC6, CAND1  
 CDKN1B, PRDX3  
 CHMP5, VPS4B  
 VAMP7, SEC22C  
 TMED2, PRDX3  
 PSMC6, DR1, GTF2A2, CAND1  
 TMED5, GOLPH3  
 CCNT2, CDKN1B, PSMD10, CCNC  
 SSB, SNRPG  
 STRAP, SNX25  
 INSIG1, ACADL  
 DHX15, DDX5  
 ABCE1, DHX29  
 RAD51C, TOP2B  
 CHMP5, VPS4B  
 CCNT2, CCNC  
 HSP90AA1, MTX2  
 UBE2A, HLTf  
 PFN2, STRAP  
 GABARAPL2, PFN2, ATP1B3, DNAJB6  
 RAP2A, COPS5  
 HSP90AA1, UBQLN1  
 ATP1B3, DNAJB6  
 UBE2E3, UBE2D3, UBE2A  
 CHMP5, VPS4B  
 RAD51C, VPS4B  
 UBE2E3, UBE2D3, UBE2A  
 CHMP5, VPS4B  
 SDHD, IDH1, MDH1  
 BMI1, RBL2  
 FBNP1L, ARF4  
 SUB1, NFE2L2  
 VAMP7, UBQLN1  
 HSP90AA1, FBNP1L  
 PFN2, LIMA1  
 PIGY, DPM1  
 CDKN1B, MAD2L1  
 CHMP5, VPS4B  
 HSP90AA1, PTS

## Supplementary\_Table\_S5

HINT1, DDX5  
GABARAPL2, COPB1  
GOLPH3, VAMP7  
STRAP, SNRPG  
METAP2, FNTA  
SRP54, SECISBP2L  
ITGAV, HINT1, TOP2B  
GABARAPL2, VAMP7, SEC22C  
CHMP5, VPS4B  
CHMP5, VPS4B  
UBE2E3, UBE2D3, UBE2A  
PSMC6, PSMD12, ITGAV, PSMD10  
TMED7, TMED2, GOLPH3, COPB1, ARF4  
PSMC6, PSMD12, PSMD10, UBA3  
PSMC6, PSMD12, PSMD10  
GABARAPL2, TBCA  
UBE2E3, ARMC10, SOCS4  
PSMC6, MAD2L1, PSMD12, PSMD10  
IDH1, MDH1  
CHMP5, VPS4B  
VAMP7, SEC22C  
PSMC6, MAD2L1, PSMD12, PSMD10  
HSP90AA1, CPNE3  
SQLE, INSIG1  
FAM135A, LYPLAL1  
RAN, DDX5  
EIF4G2, CDKN1B  
CHMP5, VAMP7  
CCNT2, CDKN1B  
CDKN1B, TBCA, HSPE1, DNAJB6  
EIF4G2, DHX29, COPS5  
PSMC6, MAD2L1, PSMD12, PSMD10  
AGPAT5, PTDSS1  
OSTC, DPM1  
TBL1XR1, UBE2D3, UBE2A, PSMC6, MAD2L1, PSMD12, PSMD10, SIAH1, PCNP, NFE2L2  
BCOR, DNAJB6  
CDKN1B, ATP1B3, KCNN2, VPS4B  
PSMC6, SIAH1  
TBL1XR1, FAM135A  
GABARAPL2, UBQLN1  
FNTA, CPNE3  
HSP90AA1, HSPE1  
DHX29, DHX15, DDX5  
SUMO2, PSMD10, SOCS4  
ENY2, CCNT2, GTF2E2, GTF2A2  
RAP2A, ARMCX3  
DPY30, CHMP5, VPS4B  
NFE2L2, SERP1  
ABCE1, EIF4G2, DHX29, COPS5, RPL34, RPS21  
UBE2D3, UBE2A, PSMC6, PSMD12, PSMD10, SIAH1, FBXO3, HLTF  
ARL6IP1, PRDX3, DNAJB6  
CCNT2, GTF2E2, GTF2A2  
SRP54, RPL34, RPS21, SRP9

## Supplementary\_Table\_S5

GOLPH3, HNRNPH1  
MRPL13, HSP90AA1, PAIP2, G3BP2, SSB  
HSP90AA1, GMNN, TOP2B, BCOR  
UBE2D3, UBE2A  
PDCD10, PRDX3  
PSMC6, YWHAZ, PSMD12, PSMD10  
SRP54, RAN  
UBE2D3, UBA3, CSNK1G3, SERP1  
EIF4G2, SERP1  
TMED7, TMED2, COPB1, VAMP7, ARF4, SEC22C  
ITGAV, CD46, DYNLT1  
EIF4G2, LIMA1, YWHAZ, ZC3H15, DHX29, FNBP1L, CHMP5, RAN, RPL34, IDH1  
PFN2, LAMP2, HSP90AA1, PDCD10, ATP1B3  
ITGAV, DDX5  
IDH1, GLO1  
CPNE3, DDX5  
EIF4G2, LIMA1, YWHAZ, ZC3H15, DHX29, FNBP1L, CHMP5, RAN, RPL34, IDH1  
BMI1, RBL2, HLTf, ASF1A  
ABCE1, PSMC6, HSP90AA1, VPS4B, ATP5F1, HLTf  
ACADL, HPRT1  
PSMC6, UBQLN1  
SFT2D1, GOLT1B, COPB1, VAMP7, CPNE3  
HSP90AA1, SERP1  
HSP90AA1, CDKN1B  
PSMC6, PSMD12, PSMD10  
CDKN1B, RBL2  
SQLE, ACADL  
MGST3, SPTLC1, PTDSS1  
TBL1XR1, PDCD10, RPS21  
NDUFB3, TMEM126B  
RAP2A, ATP1B3  
STRAP, SNX25  
PRDX3, NFE2L2  
PSMD10, UBQLN1  
DHX29, SSB, HNRNPH1  
SFT2D1, ENY2, GABARAPL2, TMED7, TMED5, CHMP5, GOLT1B, ARF4, SNX25, VPS4B, SEC22C, SERP1  
PGM2, SERP1  
ITGAV, CD46  
SQLE, INSIG1  
MED31, ENY2, COPS5, SUB1, RAN, GTF2A2, DDX5  
RAP2A, NFE2L2  
ATP6V1A, TMED7, TMED5, SYPL1, ATP1B3, TMED2, VAMP7, G3BP2, SEC22C, SLC35F5  
PFN2, PDCD10  
MGST3, PRDX3  
PSMC6, PSMD12, PSMD10  
HSP90AA1, HSPE1, DNAJB6  
GABARAPL2, ATP1B3  
HSP90AA1, ITGAV  
PRDX3, UBQLN1  
YWHAZ, METAP2, STRAP, SUMO2, GTF2E2, MRPL13, FUBP3, DHX15, LSM3, HSPE1, RPS21, SRP54, ZC3H15, I  
DHX15, LSM3, SNRNP27, DDX5, HNRNPH1, SNRPG  
TMED2, GOLPH3  
VAMP7, STXBP3

## Supplementary\_Table\_S5

CD46, CAND1  
HSP90AA1, DNAJB6  
MED31, GTF2E2, GTF2A2, CCNC  
GABARAPL2, UBQLN1  
INSIG1, BCOR  
PRDX3, NFE2L2  
BMI1, SUMO2, TOP2B  
RAD51C, CGGBP1  
PSMC6, PSMD12, PSMD10  
PGM2, MTHFD2, IDH1, ENOPH1, HPRT1  
PSMC6, PSMD12, PSMD10  
TBL1XR1, TMED2  
TIAL1, HNRNPH1  
RBL2, COPS5, UBA3  
ARL6IP1, YWHAZ, CDKN1B, PDCD10, MAD2L1, GOLPH3, PSMD10, ARF4, GLO1, PRDX3, HIGD1A  
CDKN1B, HSPE1  
EIF4G2, PSMD10  
PFN2, RAN, DNAJB6  
CCNT2, RBL2, GMNN, SIAH1, PCNP  
SDHD, ACADL  
VPS4B, SIAH1, PRDX3, TOP2B  
GABARAPL2, FBNP1L, VPS4B  
HSP90AA1, TBCA, HSPE1, DNAJB6  
RAD51C, SUB1  
MED31, UBE2A, SIAH1, HLTF  
UBE2D3, UBE2A, PSMC6, SIAH1  
UBE2E3, UBE2D3, UBE2A, KLHL9, SIAH1, FBXO3, BCOR  
PDCD10, RBL2, CD46  
FBNP1L, VAMP7, CSNK1G3  
RAP2A, FAM60A  
NFE2L2, UBQLN1  
HSP90AA1, HINT1, TIAL1, G3BP2, SSB, HNRNPH1, HPRT1  
ARL6IP1, DPY30, YWHAZ, PSMC6, MAD2L1, HSP90AA1, CGGBP1, UBA3, VPS4B, DYNLT1, SIAH1, PRDX3, PTS,  
TBL1XR1, DR1, GMNN, BCOR  
PSMC6, PSMD12, PSMD10  
LAMP2, YWHAZ, KCNN2, NFE2L2  
MED31, UBE2D3, KLHL9, PCNP, SOCS4, CAND1, NFE2L2  
RAD51C, MAD2L1  
LAMP2, FAM3C  
TBL1XR1, ZNF217, NFE2L2, BCOR  
HSPE1, ASF1A  
MGST3, ABHD3, CPNE3  
FUBP3, PDCD10, TMED2, CD46, NFE2L2  
HSP90AA1, TOP2B  
ATP6AP2, CD46, TMEM123, PAQR3  
EIF4G2, FUBP3, TIAL1, RPL34, LSM3, SSB, HNRNPH1, YTHDF3, SRP9, SNRPG  
PSMC6, PSMD12, PSMD10  
IDH1, PRDX3  
YWHAZ, DR1, PSMD10, GTF2A2, BCOR  
MED31, ENY2, RBL2, SUB1, TIAL1, GLO1, DDX5, HLTF  
GABARAPL2, SUMO2, UBE2A, YWHAZ, HLTF  
AGPAT5, ATP6AP2, INSIG1  
RPL34, RPS21



# Supplementary\_Table\_S5

RAP2A, SRP54, RAN, ARF4  
 ITGAV, GOLPH3, ARF4  
 PGM2, GLO1, MDH1  
 RAD51C, UBE2D3, UBE2A, ASF1A  
 TBL1XR1, ASF1A  
 PSMC6, PSMD12, PSMD10  
 RPL34, RPS21  
 SPTLC1, ATP6AP2, HINT1  
 ATP1B3, ITGAV  
 PDCD10, ITGAV, CPNE3  
 PSMC6, HINT1, LYPLAL1  
 MRPL13, COPS5, RPL34, RPS21  
 CCNT2, GTF2E2, FUBP3, COPS5, SUB1, GTF2A2, NFE2L2, HLT  
 PSMC6, PSMD12, PSMD10, PAQR3  
 ZC3H15, SOCS4  
 CCNT2, TBL1XR1, COPS5, SUB1, CCNC, DDX5, HLT  
 SUMO2, FUBP3, WDR61, GTF2A2, ARF4, ARMCX3, NFE2  
 EIF4G2, CDKN1B  
 DPY30, HSP90AA1, PDCD10, MAD2L1, KCNN2, GTF2A2, VPS4B, IDH1, PTS, HPRT1  
 MRPL13, RPL34, RPS21  
 BMI1, TBL1XR1, UBE2D3, ZNF217, STRAP, CGGBP1, DR1, PSMD10, DDX5, BCOR  
 FNBP1L, OSBPL9  
 RAD51C, CHMP5, ATP6AP2, UBQLN1, DPY30, GTF2E2, FNTA, CGGBP1, CD46, INSIG1, FBXO28, VPS4B, LSM3,  
 RAP2A, SRP54, HSP90AA1, RAN, ARF4  
 ABCE1, RAN, COPB1, GTF2A2  
 ENY2, CCNT2, RAN, TOP2B, ASF1A  
 MAD2L1, SIAH1  
 UBE2A, CDKN1B, PDCD10, ITGAV, TIAL1, PRDX3  
 YWHAZ, CDKN1B, STRAP  
 TMED2, RAN, COPB1  
 LAMP2, GOLPH3, DDX5, TOP2B  
 RAP2A, RAN, ARF4  
 RAN, KLHL9, DYNLT1  
 DHX15, SNRPG  
 ZNF217, CDKN1B, GMNN, UBA3, BCOR, DNAJB6  
 ABCE1, RAD51C, UBE2A, HSP90AA1, DDX5, HLT  
 ATP6V1A, UBE2E3, PSMC6, UBE2D3, DHX29, UBA3, DHX15  
 FAM3C, CMTM6  
 CCNT2, MAD2L1, RAN, DYNLT1  
 DHX15, LSM3  
 HIST1H2AC, DR1, UBA3, GTF2A2, TOP2B  
 CCNT2, YWHAZ, PDCD10, PRDX3  
 CCNT2, CCNC, CPNE3, CSNK1G3  
 EIF4G2, BCOR  
 KCNN2, DDX5  
 WDR61, CSNK1G3  
 ARL6IP1, UBE2D3, TIAL1, PSMD10, SIAH1, PRDX3  
 ARF4, STXBP3  
 SQLE, DHRS7  
 SYPL1, CPNE3  
 ITGAV, DNAJB6  
 MTHFD2, SQLE, ACADL, HIGD1A, DHRS7, UQCRB  
 CD46, UBA3, SPCS1, FBXO3, ALG13  
 GABARAPL2, FNTA  
 SRP54, HSP90AA1, CDKN1B

### Supplementary\_Table\_S5

ATP6V1A, ATP1B3  
ZNF217, METTL5, DHX29, TIAL1, G3BP2, SNRNP27, DDX5, HNRNPH1, HLTf  
RPL34, RPS21  
PDCD10, ITGAV  
FUBP3, HLTf  
FUBP3, ZNF217, HLTf  
RAD51C, PAIP2, SIAH1  
ENY2, TBL1XR1, FUBP3, RAN  
SIAH1, HLTf  
BMI1, CCNT2, TBL1XR1, RBL2, HINT1, DPY30, FUBP3, ZNF217, WDR61, CGGBP1, DR1, NFE2L2, BCOR, ASF1A  
MGST3, YWHAZ, HSP90AA1, ZNF217, GOLT1B, RAN, HINT1, CSNK1G3  
CCNT2, CCNC, CPNE3  
RAD51C, HIST1H2AC, GTF2E2, RBL2, SUB1, DR1, NFE2L2, HLTf, TOP2B, DNAJB6  
ZNF217, FAM96A, METAP2, ZC3H15, COPS5, ITGAV, MCEE, SDHD, HSPE1, PTS, TOP2B, ZNHIT3  
STRAP, IDH1  
GOLPH3, INSIG1  
HIST1H2AC, CDKN1B  
BMI1, LIMA1, GLO1, SIAH1, HLTf  
GTF2E2, ZNF217, HINT1, GTF2A2, HLTf, ZNHIT3  
FAM3C, SIAH1  
FNBP1L, ARF4  
ZNF217, NFE2L2

## Supplementary\_Table\_S5

## Supplementary\_Table\_S5

## Supplementary\_Table\_S5

## Supplementary\_Table\_S5

## Supplementary\_Table\_S5

, ITGAV, TMEM123, HSPE1, FBXO3, BCOR, ASF1A, GABARAPL2, SRP54, ZC3H15, PAIP2, SUB1, PCNP, SSB, DDX5, UBE2E3, P

## Supplementary\_Table\_S5



## Supplementary\_Table\_S5

## Supplementary\_Table\_S5

## Supplementary\_Table\_S5

## Supplementary\_Table\_S5

## Supplementary\_Table\_S5

P, SSB, DDX5, UBE2E3, PSMC6, LAMP2, CDKN1B, ZNF217, WDR61, UBA3, ARF4, SPCS1, CPNE3, SNRNP27, FBXO34, HNRNPH

## Supplementary\_Table\_S5

## Supplementary\_Table\_S5

## Supplementary\_Table\_S5



## Supplementary\_Table\_S5

## Supplementary\_Table\_S5

## Supplementary\_Table\_S5

RNP27, FBXO34, HNRNPH1, DNAJB6, BMI1, CCNT2, LIMA1, FAM96A, COPS5, FAM3C, PRDX3, FUBP3, AGPAT5, MCEE, COPB1,

## Supplementary\_Table\_S5

## Supplementary\_Table\_S5

## Supplementary\_Table\_S5

## Supplementary\_Table\_S5

## Supplementary\_Table\_S5



## Supplementary\_Table\_S5

AGPAT5, MCEE, COPB1, GTF2A2, ABCE1, RAP2A, TBL1XR1, UBE2A, HSP90AA1, G3BP2, DYNLT1, CCNC, STXBP3, HLTF, EIF4

## Supplementary\_Table\_S5

## Supplementary\_Table\_S5

## Supplementary\_Table\_S5

## Supplementary\_Table\_S5

## Supplementary\_Table\_S5

## Supplementary\_Table\_S5

CNC, STXBP3, HLTF, EIF4G2, TBCA, SIAH1, CAND1, SRP9, UQCRB, SERP1, OSTC, YWHAZ, HPRT1, SUMO2, MRPL13, TMED5, T

## Supplementary\_Table\_S5



## Supplementary\_Table\_S5

## Supplementary\_Table\_S5

## Supplementary\_Table\_S5

## Supplementary\_Table\_S5

## Supplementary\_Table\_S5

JMO2, MRPL13, TMED5, TMED2, DHX15, SEC22C, PTS, PDCD10, GMNN, ATP5F1, SCOC, FAM60A, MED31, MGST3, GOLPH3, P

## Supplementary\_Table\_S5

## Supplementary\_Table\_S5

## Supplementary\_Table\_S5



## Supplementary\_Table\_S5

## Supplementary\_Table\_S5

## Supplementary\_Table\_S5

ED31, MGST3, GOLPH3, PSMD10, DR1, KCNN2, DPM1, SECISBP2L

## Supplementary\_Table\_S5
