# Supplementary material for: The Impact of Cand1 in Prostate Cancer
Source: MDPI journal article supplement (doi:10.3390/cancers12020428), 2020-02-12
Supplement: s1 [file s1]

Supplementary\_table\_S3

| Study    | Probe ID  | Entrez Gene ID | Gene Symbol | log2 Fold Regulation |
|----------|-----------|----------------|-------------|----------------------|
| GSE16560 | DAP1_3608 | 2354           | FOSB        | -0,612911276         |
| GSE16560 | DAP1_2352 | 6436           | SFTPA2      | -0,609640044         |
| GSE16560 | DAP2_0991 | 8537           | BCAS1       | -0,582926226         |
| GSE16560 | DAP2_1680 | 3783           | KCNN4       | -0,568955782         |
| GSE16560 | DAP3_2403 | 1485           | CTAG1B      | -0,551104594         |
| GSE16560 | DAP3_5268 | 2953           | GSTT2       | -0,549359439         |
| GSE16560 | DAP3_4225 | 10866          | HCP5        | -0,549258237         |
| GSE16560 | DAP2_3153 | 2786           | GNG4        | -0,527461331         |
| GSE16560 | DAP3_3706 | 4330           | MN1         | -0,517239952         |
| GSE16560 | DAP3_1375 | 27253          | PCDH17      | -0,513022253         |
| GSE16560 | DAP1_5829 | 4495           | MT1G        | -0,511126445         |
| GSE16560 | DAP2_4227 | 2330           | FMO5        | -0,510800989         |
| GSE16560 | DAP3_3870 | 3386           | ICAM4       | -0,500948192         |
| GSE16560 | DAP1_0296 | 4793           | NFKBIB      | -0,497180151         |
| GSE16560 | DAP3_5177 | 6779           | STATH       | -0,478027715         |
| GSE16560 | DAP3_1868 | 410            | ARSA        | -0,477639584         |
| GSE16560 | DAP1_2943 | 2998           | GYS2        | -0,463310908         |
| GSE16560 | DAP2_3561 | 1803           | DPP4        | -0,436799494         |
| GSE16560 | DAP3_1693 | 8045           | RASSF7      | -0,42886378          |
| GSE16560 | DAP3_5091 | 634            | CEACAM1     | -0,413695015         |
| GSE16560 | DAP1_5854 | 5080           | PAX6        | -0,37600828          |
| GSE16560 | DAP2_2962 | 217            | ALDH2       | -0,36658444          |
| GSE16560 | DAP4_1851 | 3439           | IFNA1       | -0,363638664         |
| GSE16560 | DAP3_5698 | 717            | C2          | -0,358046116         |
| GSE16560 | DAP4_1170 | 4494           | MT1F        | -0,33714565          |
| GSE16560 | DAP4_3561 | 688            | KLF5        | -0,332440343         |
| GSE16560 | DAP4_3988 | 6304           | SATB1       | -0,328821804         |
| GSE16560 | DAP1_1432 | 5164           | PDK2        | -0,327293428         |
| GSE16560 | DAP4_2021 | 4276           | MICA        | -0,322242539         |
| GSE40272 | X12127    | 7306           | TYRP1       | -2,606622093         |
| GSE40272 | X33466    | 6005           | RHAG        | -2,426661734         |
| GSE40272 | X24655    | 11339          | OIP5        | -2,356292283         |
| GSE40272 | X27325    | 121355         | GTSE1       | -2,237014271         |
| GSE40272 | X14922    | 1244           | ABCC2       | -2,050808668         |
| GSE40272 | X34378    | 10874          | NMU         | -2,039205074         |
| GSE40272 | X15839    | 7306           | TYRP1       | -1,977973044         |
| GSE40272 | X36709    | 4102           | MAGEA3      | -1,897214588         |
| GSE40272 | X26954    | 1081           | CGA         | -1,837656448         |
| GSE40272 | X1394     | 9837           | GLIS1       | -1,80085518          |
| GSE40272 | X2848     | 2078           | ERG         | -1,776527484         |
| GSE40272 | X16909    | 84528          | RHOXF2      | -1,736748943         |
| GSE40272 | X35082    | 10642          | IGF2BP1     | -1,711393235         |
| GSE40272 | X2888     | 199            | AIF1        | -1,691105708         |
| GSE40272 | X17229    | 3053           | SERPIND1    | -1,674110465         |
| GSE40272 | X27685    | 3747           | KCNC2       | -1,658002643         |
| GSE40272 | X34642    | 9928           | KIF14       | -1,64595296          |
| GSE40272 | X13196    | 4101           | MAGEA2      | -1,644442918         |
| GSE40272 | X30563    | 10642          | IGF2BP1     | -1,613270085         |
| GSE40272 | X36804    | 8438           | RAD54L      | -1,611536469         |
| GSE40272 | X14163    | 5366           | PMAIP1      | -1,605041755         |
| GSE40272 | X12351    | 221150         | SKA3        | -1,601806554         |

# Supplementary\_table\_S3

|          |        |                  |              |
|----------|--------|------------------|--------------|
| GSE40272 | X41659 | 55268 ECHDC2     | -1,57592019  |
| GSE40272 | X22878 | 5105 PCK1        | -1,530469345 |
| GSE40272 | X18917 | 5467 PPARC       | -1,525997357 |
| GSE40272 | X26931 | 90632 C6orf176   | -1,52145296  |
| GSE40272 | X10406 | 10371 SEMA3A     | -1,505013742 |
| GSE40272 | X9647  | 3783 KCNN4       | -1,49612685  |
| GSE40272 | X37174 | 54596 L1TD1      | -1,47555074  |
| GSE40272 | X5876  | 55789 DEPDC1B    | -1,455882664 |
| GSE40272 | X16813 | 7503 XIST        | -1,435859408 |
| GSE40272 | X37707 | 91227 GGTLC2     | -1,433968816 |
| GSE40272 | X7416  | 51200 CPA4       | -1,422878964 |
| GSE40272 | X30290 | 1361 CPB2        | -1,414602537 |
| GSE40272 | X34831 | 7090 TLE3        | -1,409902748 |
| GSE40272 | X41188 | 51365 PLA1A      | -1,405476744 |
| GSE40272 | X11176 | 5524 PPP2R4      | -1,40546723  |
| GSE40272 | X40324 | 255738 PCSK9     | -1,400770613 |
| GSE40272 | X23421 | 389421 LIN28B    | -1,40027907  |
| GSE40272 | X28461 | 4547 MTPP        | -1,398825581 |
| GSE40272 | X31355 | 7157 TP53        | -1,397210888 |
| GSE40272 | X10053 | 11156 PTP4A3     | -1,392834567 |
| GSE40272 | X27777 | 5225 PGC         | -1,38705814  |
| GSE40272 | X35386 | 9582 APOBEC3B    | -1,384124207 |
| GSE40272 | X6896  | 310 ANXA7        | -1,383252643 |
| GSE40272 | X8247  | 54502 RBM47      | -1,375784884 |
| GSE40272 | X1459  | 118424 UBE2J2    | -1,36063055  |
| GSE40272 | X41103 | 10840 ALDH1L1    | -1,356440275 |
| GSE40272 | X24388 | 3909 LAMA3       | -1,345946089 |
| GSE40272 | X9780  | 3795 KHK         | -1,338549154 |
| GSE40272 | X20456 | 5478 PPIA        | -1,334363108 |
| GSE40272 | X38910 | 219848 FLJ30719  | -1,331270613 |
| GSE40272 | X31425 | 1796 DOK1        | -1,326197674 |
| GSE40272 | X34363 | 346547 ERVFC1-1  | -1,321808668 |
| GSE40272 | X41454 | 5998 RGS3        | -1,318747357 |
| GSE40272 | X40996 | 816 CAMK2B       | -1,308104651 |
| GSE40272 | X30660 | 254910 LCE5A     | -1,306554968 |
| GSE40272 | X27143 | 55117 SLC6A15    | -1,304352008 |
| GSE40272 | X40860 | 162835 LOC162835 | -1,303866279 |
| GSE40272 | X12916 | 2051 EPHB6       | -1,294062368 |
| GSE40272 | X14902 | 5119 CHMP1A      | -1,285560782 |
| GSE40272 | X20178 | 54869 EPS8L1     | -1,28322833  |
| GSE40272 | X41710 | 254528 C16orf73  | -1,282754228 |
| GSE40272 | X30637 | 90768 MGC45800   | -1,282127378 |
| GSE40272 | X15949 | 5272 SERPINB9    | -1,279132664 |
| GSE40272 | X3637  | 342667 STAC2     | -1,275186575 |
| GSE40272 | X26144 | 285905 INTS4L1   | -1,273284355 |
| GSE40272 | X44056 | 57082 CASC5      | -1,262102008 |
| GSE40272 | X23609 | 4111 MAGEA12     | -1,261752643 |
| GSE40272 | X42487 | 392255 GDF6      | -1,260780127 |
| GSE40272 | X15306 | 10994 ILVBL      | -1,257496829 |
| GSE40272 | X23767 | 131578 LRRC15    | -1,25437685  |
| GSE40272 | X35304 | 7036 TFR2        | -1,252570825 |
| GSE40272 | X15206 | 8402 SLC25A11    | -1,244505814 |
| GSE40272 | X13612 | 26806 SNORD44    | -1,240940803 |

# Supplementary\_table\_S3

|          |        |                   |              |
|----------|--------|-------------------|--------------|
| GSE40272 | X39233 | 472 ATM           | -1,233697146 |
| GSE40272 | X1409  | 79763 ISOC2       | -1,231684989 |
| GSE40272 | X17398 | 151449 GDF7       | -1,226843023 |
| GSE40272 | X6849  | 92305 TMEM129     | -1,224349894 |
| GSE40272 | X7824  | 310 ANXA7         | -1,222986786 |
| GSE40272 | X35495 | 6768 ST14         | -1,220802326 |
| GSE40272 | X3792  | 7052 TGM2         | -1,215511099 |
| GSE40272 | X5212  | 2011 MARK2        | -1,214087209 |
| GSE40272 | X27881 | 91614 DEPDC7      | -1,213451374 |
| GSE40272 | X34311 | 7855 FZD5         | -1,210773784 |
| GSE40272 | X12208 | 390613 LOC390613  | -1,210033298 |
| GSE40272 | X29729 | 390992 HES3       | -1,208695032 |
| GSE40272 | X3592  | 1443 CSH2         | -1,207419133 |
| GSE40272 | X17565 | 84680 ACCS        | -1,20681871  |
| GSE40272 | X34465 | 26267 FBXO10      | -1,206107822 |
| GSE40272 | X30054 | 51226 COPZ2       | -1,201440803 |
| GSE40272 | X4195  | 26493 OR8B8       | -1,200421247 |
| GSE40272 | X16723 | 81624 DIAPH3      | -1,196663848 |
| GSE40272 | X42318 | 3547 IGSF1        | -1,196515856 |
| GSE40272 | X18215 | 79589 RNF128      | -1,196513742 |
| GSE40272 | X30730 | 399983 FLJ33297   | -1,1955037   |
| GSE40272 | X19330 | 83999 KREMEN1     | -1,195158562 |
| GSE40272 | X19538 | 9793 CKAP5        | -1,19498203  |
| GSE40272 | X7728  | 23555 TSPAN15     | -1,193323467 |
| GSE40272 | X10980 | 6928 HNF1B        | -1,191439218 |
| GSE40272 | X13072 | 440901 LOC440901  | -1,190884778 |
| GSE40272 | X20089 | 9052 GPRC5A       | -1,188265328 |
| GSE40272 | X15079 | 2356 FPGS         | -1,186539112 |
| GSE40272 | X20126 | 3875 KRT18        | -1,182337738 |
| GSE40272 | X8928  | 81622 UNC93B1     | -1,179571882 |
| GSE40272 | X17303 | 55247 NEIL3       | -1,179488372 |
| GSE40272 | X28348 | 63935 PCIF1       | -1,178140592 |
| GSE40272 | X534   | 84818 IL17RC      | -1,175174947 |
| GSE40272 | X10602 | 4035 LRP1         | -1,172519027 |
| GSE40272 | X1569  | 2101 ESRRA        | -1,169865751 |
| GSE40272 | X20792 | 7408 VASP         | -1,168707717 |
| GSE40272 | X26469 | 4323 MMP14        | -1,168056025 |
| GSE40272 | X3248  | 3909 LAMA3        | -1,164634249 |
| GSE40272 | X38692 | 9902 MRC2         | -1,163920719 |
| GSE40272 | X34492 | 10169 SERF2       | -1,163053911 |
| GSE40272 | X43478 | 390063 OR51I1     | -1,161506342 |
| GSE40272 | X3153  | 598 BCL2L1        | -1,161271142 |
| GSE40272 | X38152 | 23428 SLC7A8      | -1,16055074  |
| GSE40272 | X2472  | 440686 HIST2H3PS2 | -1,158582981 |
| GSE40272 | X18284 | 5601 MAPK9        | -1,157479915 |
| GSE40272 | X16890 | 9076 CLDN1        | -1,15540222  |
| GSE40272 | X12525 | 6442 SGCA         | -1,155158562 |
| GSE40272 | X11667 | 6911 TBX6         | -1,154096195 |
| GSE40272 | X22299 | 51087 YBX2        | -1,150770085 |
| GSE40272 | X27668 | 3875 KRT18        | -1,150076638 |
| GSE40272 | X37700 | 4001 LMNB1        | -1,148638478 |
| GSE40272 | X13588 | 22824 HSPA4L      | -1,144663848 |
| GSE40272 | X19505 | 51274 KLF3        | -1,142471987 |

# Supplementary\_table\_S3

|          |        |                     |              |
|----------|--------|---------------------|--------------|
| GSE40272 | X18960 | 310 ANXA7           | -1,141781712 |
| GSE40272 | X38609 | 926 CD8B            | -1,13589482  |
| GSE40272 | X24535 | 400768 LOC400768    | -1,135738372 |
| GSE40272 | X10365 | 4145 MATK           | -1,135281184 |
| GSE40272 | X21979 | 4582 MUC1           | -1,130243658 |
| GSE40272 | X10509 | 4643 MYO1E          | -1,128569767 |
| GSE40272 | X15399 | 92086 GTTLC1        | -1,127331395 |
| GSE40272 | X13383 | 90381 C15orf42      | -1,12726797  |
| GSE40272 | X34054 | 440605 LOC440605    | -1,126207717 |
| GSE40272 | X5258  | 120793 OR56A4       | -1,124005285 |
| GSE40272 | X37947 | 22955 SCMH1         | -1,121192918 |
| GSE40272 | X16349 | 396 ARHGDIA         | -1,117561311 |
| GSE40272 | X23047 | 226 ALDOA           | -1,116317125 |
| GSE40272 | X27268 | 5696 PSMB8          | -1,116211416 |
| GSE40272 | X42250 | 128864 C20orf144    | -1,1155074   |
| GSE40272 | X4357  | 222029 DKFZp434L192 | -1,115135835 |
| GSE40272 | X13268 | 344167 FOXI3        | -1,114918605 |
| GSE40272 | X41334 | 6928 HNF1B          | -1,113364165 |
| GSE40272 | X37655 | 10227 MFSD10        | -1,113161734 |
| GSE40272 | X22174 | 780 DDR1            | -1,112104123 |
| GSE40272 | X1070  | 1840 DTX1           | -1,111313953 |
| GSE40272 | X26732 | 30837 SOCS7         | -1,111158034 |
| GSE40272 | X1324  | 3145 HMBS           | -1,110470402 |
| GSE40272 | X2938  | 53822 FXYP7         | -1,110221459 |
| GSE40272 | X8283  | 4150 MAZ            | -1,109356765 |
| GSE40272 | X15920 | 5066 PAM            | -1,104729915 |
| GSE40272 | X28530 | 389812 LCN15        | -1,104695032 |
| GSE40272 | X16956 | 55898 UNC45A        | -1,104680761 |
| GSE40272 | X7533  | 9761 MLEC           | -1,10451797  |
| GSE40272 | X11159 | 55544 RBM38         | -1,103632664 |
| GSE40272 | X3981  | 11186 RASSF1        | -1,102276427 |
| GSE40272 | X42564 | 10072 DPP3          | -1,102265328 |
| GSE40272 | X19723 | 9118 INA            | -1,101883721 |
| GSE40272 | X6954  | 85300 ATCAY         | -1,101317653 |
| GSE40272 | X30781 | 221191 PRSS54       | -1,100763214 |
| GSE40272 | X3141  | 56999 ADAMTS9       | -1,099383721 |
| GSE40272 | X19375 | 9271 PIWIL1         | -1,098913848 |
| GSE40272 | X9571  | 310 ANXA7           | -1,096243129 |
| GSE40272 | X34534 | 221914 GPC2         | -1,095752643 |
| GSE40272 | X15699 | 2570 GABRR2         | -1,095062896 |
| GSE40272 | X28090 | 3909 LAMA3          | -1,09314482  |
| GSE40272 | X18738 | 128439 SNHG11       | -1,090332452 |
| GSE40272 | X33939 | 10994 ILVBL         | -1,086528013 |
| GSE40272 | X4710  | 11187 PKP3          | -1,085926004 |
| GSE40272 | X1493  | 55506 H2AFY2        | -1,085486786 |
| GSE40272 | X8643  | 310 ANXA7           | -1,085347252 |
| GSE40272 | X34601 | 5932 RBBP8          | -1,085052326 |
| GSE40272 | X30262 | 8291 DYSF           | -1,084912262 |
| GSE40272 | X34069 | 1201 CLN3           | -1,083978858 |
| GSE40272 | X639   | 80833 APOL3         | -1,082211416 |
| GSE40272 | X38406 | 4739 NEDD9          | -1,082039112 |
| GSE40272 | X21849 | 410 ARSA            | -1,079303911 |
| GSE40272 | X5152  | 112464 PRKCDBP      | -1,079051268 |

# Supplementary\_table\_S3

|          |        |        |           |              |
|----------|--------|--------|-----------|--------------|
| GSE40272 | X28383 | 1938   | EEF2      | -1,078700317 |
| GSE40272 | X35412 | 4588   | MUC6      | -1,077423362 |
| GSE40272 | X27758 | 4582   | MUC1      | -1,076229387 |
| GSE40272 | X12629 | 56052  | ALG1      | -1,074006342 |
| GSE40272 | X2400  | 7094   | TLN1      | -1,073325053 |
| GSE40272 | X34969 | 3360   | HTR4      | -1,072147992 |
| GSE40272 | X36252 | 3909   | LAMA3     | -1,071039112 |
| GSE40272 | X35195 | 3268   | AGFG2     | -1,070734144 |
| GSE40272 | X22724 | 84034  | EMILIN2   | -1,069859408 |
| GSE40272 | X6672  | 9545   | RAB3D     | -1,066899577 |
| GSE40272 | X3606  | 80728  | ARHGAP39  | -1,06652907  |
| GSE40272 | X42050 | 310    | ANXA7     | -1,065751586 |
| GSE40272 | X24429 | 55534  | MAML3     | -1,06455814  |
| GSE40272 | X9042  | 53342  | IL17D     | -1,064122093 |
| GSE40272 | X12084 | 943    | TNFRSF8   | -1,063189218 |
| GSE40272 | X14550 | 3909   | LAMA3     | -1,063011099 |
| GSE40272 | X23442 | 3955   | LFNG      | -1,061075581 |
| GSE40272 | X23191 | 6710   | SPTB      | -1,060935518 |
| GSE40272 | X5209  | 57592  | ZNF687    | -1,060517442 |
| GSE40272 | X42978 | 310    | ANXA7     | -1,060186047 |
| GSE40272 | X33539 | 57586  | SYT13     | -1,059862579 |
| GSE40272 | X27369 | 6494   | SIPA1     | -1,059525899 |
| GSE40272 | X26211 | 5360   | PLTP      | -1,059302326 |
| GSE40272 | X2259  | 440454 | LOC440454 | -1,056590909 |
| GSE40272 | X17464 | 440788 | LOC440788 | -1,05440222  |
| GSE40272 | X27419 | 9051   | PSTPIP1   | -1,052076638 |
| GSE40272 | X32932 | 5608   | MAP2K6    | -1,05182241  |
| GSE40272 | X35964 | 3909   | LAMA3     | -1,051705074 |
| GSE40272 | X17080 | 7288   | TULP2     | -1,050663848 |
| GSE40272 | X34024 | 5629   | PROX1     | -1,049588795 |
| GSE40272 | X34663 | 284695 | ZNF326    | -1,049359408 |
| GSE40272 | X23658 | 10101  | NUBP2     | -1,048459831 |
| GSE40272 | X39083 | 400832 | LOC400832 | -1,046849366 |
| GSE40272 | X35139 | 10072  | DPP3      | -1,046678118 |
| GSE40272 | X34988 | 391667 | LOC391667 | -1,046186575 |
| GSE40272 | X35806 | 2934   | GSN       | -1,045169662 |
| GSE40272 | X7909  | 4109   | MAGEA10   | -1,044600951 |
| GSE40272 | X693   | 2972   | BRF1      | -1,044471987 |
| GSE40272 | X16738 | 421    | ARVCF     | -1,043941332 |
| GSE40272 | X15486 | 5250   | SLC25A3   | -1,043642178 |
| GSE40272 | X30894 | 51282  | SCAND1    | -1,043504228 |
| GSE40272 | X18473 | 10755  | GIPC1     | -1,041081924 |
| GSE40272 | X1392  | 9590   | AKAP12    | -1,040788584 |
| GSE40272 | X4402  | 79845  | RNF122    | -1,040221987 |
| GSE40272 | X2082  | 11278  | KLF12     | -1,039421247 |
| GSE40272 | X37474 | 55898  | UNC45A    | -1,038914376 |
| GSE40272 | X27584 | 266722 | HS6ST3    | -1,038432347 |
| GSE40272 | X4014  | 81622  | UNC93B1   | -1,038306554 |
| GSE40272 | X12526 | 5522   | PPP2R2C   | -1,038010571 |
| GSE40272 | X14271 | 9840   | KIAA0748  | -1,035633721 |
| GSE40272 | X18726 | 2668   | GDNF      | -1,035118922 |
| GSE40272 | X37192 | 51069  | MRPL2     | -1,034860465 |
| GSE40272 | X7112  | 348801 | LNP1      | -1,034063425 |

# Supplementary\_table\_S3

|          |        |                  |              |
|----------|--------|------------------|--------------|
| GSE40272 | X12769 | 3224 HOXC8       | -1,033052326 |
| GSE40272 | X41365 | 5818 PVRL1       | -1,032633721 |
| GSE40272 | X34586 | 8777 MPDZ        | -1,031748943 |
| GSE40272 | X4352  | 116154 PHACTR3   | -1,030968288 |
| GSE40272 | X22544 | 54498 SMOX       | -1,030681818 |
| GSE40272 | X1093  | 253982 ASPHD1    | -1,030556025 |
| GSE40272 | X7776  | 92497 LOC92497   | -1,029607294 |
| GSE40272 | X6889  | 4035 LRP1        | -1,026736786 |
| GSE40272 | X28171 | 6663 SOX10       | -1,026724101 |
| GSE40272 | X41859 | 51703 ACSL5      | -1,026401691 |
| GSE40272 | X35001 | 4137 MAPT        | -1,026214588 |
| GSE40272 | X26447 | 2036 EPB41L1     | -1,024792812 |
| GSE40272 | X1782  | 721 C4B          | -1,024592495 |
| GSE40272 | X34852 | 441759 LOC441759 | -1,024419662 |
| GSE40272 | X35515 | 56999 ADAMTS9    | -1,023619979 |
| GSE40272 | X15358 | 388228 SBK1      | -1,023258985 |
| GSE40272 | X32376 | 55741 EDEM2      | -1,022388478 |
| GSE40272 | X8331  | 51228 GLTP       | -1,022163319 |
| GSE40272 | X9507  | 4957 ODF2        | -1,021280655 |
| GSE40272 | X19025 | 11060 WWP2       | -1,020401691 |
| GSE40272 | X12878 | 22879 MON1B      | -1,020150106 |
| GSE40272 | X20301 | 126374 WTIP      | -1,01610148  |
| GSE40272 | X16650 | 23600 AMACR      | -1,01608351  |
| GSE40272 | X5351  | 6659 SOX4        | -1,015429704 |
| GSE40272 | X31571 | 83593 RASSF5     | -1,01520296  |
| GSE40272 | X11360 | 84060 C7orf64    | -1,014980444 |
| GSE40272 | X14380 | 3909 LAMA3       | -1,014944503 |
| GSE40272 | X42954 | 9344 TAOX2       | -1,014107294 |
| GSE40272 | X31136 | 219409 GSX1      | -1,013874207 |
| GSE40272 | X7937  | 610 HCN2         | -1,013801797 |
| GSE40272 | X2021  | 5566 PRKACA      | -1,013725687 |
| GSE40272 | X31608 | 8943 AP3D1       | -1,013448732 |
| GSE40272 | X1721  | 1,00E+04 AKT3    | -1,012603594 |
| GSE40272 | X11378 | 4791 NFKB2       | -1,012097252 |
| GSE40272 | X6391  | 116985 ARAP1     | -1,011973044 |
| GSE40272 | X8277  | 81572 PDRG1      | -1,010286469 |
| GSE40272 | X23026 | 440008 LOC440008 | -1,010247357 |
| GSE40272 | X16758 | 202374 STK32A    | -1,010161205 |
| GSE40272 | X42555 | 22876 INPP5F     | -1,010100951 |
| GSE40272 | X22430 | 389692 MAFA      | -1,008785941 |
| GSE40272 | X27063 | 80331 DNAJC5     | -1,006703488 |
| GSE40272 | X43464 | 7337 UBE3A       | -1,006088266 |
| GSE40272 | X43499 | 345537 LOC345537 | -1,003967759 |
| GSE40272 | X12331 | 7375 USP4        | -1,002116279 |
| GSE40272 | X37945 | 9463 PICK1       | -1,001516385 |
| GSE40272 | X9598  | 7516 XRCC2       | -1,000801268 |
| GSE40272 | X31016 | 112939 NACC1     | -0,999543869 |
| GSE40272 | X28868 | 25897 RNF19A     | -0,998522199 |
| GSE40272 | X6306  | 92922 CCDC102A   | -0,998368922 |
| GSE40272 | X20914 | 8864 PER2        | -0,997709302 |
| GSE40272 | X20346 | 5909 RAP1GAP     | -0,996866808 |
| GSE40272 | X42489 | 400733 LOC400733 | -0,994713002 |
| GSE40272 | X20833 | 10072 DPP3       | -0,994163848 |

Supplementary\_table\_S3

|          |        |                  |              |
|----------|--------|------------------|--------------|
| GSE40272 | X10015 | 3155 HMGCL       | -0,994035941 |
| GSE40272 | X10733 | 2099 ESR1        | -0,993155391 |
| GSE40272 | X37623 | 9817 KEAP1       | -0,991519556 |
| GSE40272 | X29298 | 23476 BRD4       | -0,99012685  |
| GSE40272 | X28913 | 23432 GPR161     | -0,989391649 |
| GSE40272 | X5665  | 900 CCNG1        | -0,988174947 |
| GSE40272 | X22815 | 1938 EEF2        | -0,987182347 |
| GSE40272 | X34729 | 4035 LRP1        | -0,98684778  |
| GSE40272 | X6538  | 8535 CBX4        | -0,986832981 |
| GSE40272 | X3016  | 649 BMP1         | -0,986223044 |
| GSE40272 | X7288  | 55117 SLC6A15    | -0,985373679 |
| GSE40272 | X8868  | 27022 FOXD3      | -0,985275899 |
| GSE40272 | X9809  | 23218 NBEAL2     | -0,984602008 |
| GSE40272 | X3850  | 345430 KRT18P41  | -0,984339323 |
| GSE40272 | X7027  | 29948 OSGIN1     | -0,983064482 |
| GSE40272 | X26950 | 1488 CTBP2       | -0,982930233 |
| GSE40272 | X27756 | 23037 PDZD2      | -0,982799154 |
| GSE40272 | X11485 | 390529 LOC390529 | -0,982640063 |
| GSE40272 | X25553 | 146223 CMTM4     | -0,981686575 |
| GSE40272 | X1430  | 51435 SCARA3     | -0,981469345 |
| GSE40272 | X17104 | 310 ANXA7        | -0,980595666 |
| GSE40272 | X3964  | 155066 ATP6V0E2  | -0,980429704 |
| GSE40272 | X17195 | 221711 SYCP2L    | -0,980167548 |
| GSE40272 | X28713 | 140730 RIMS4     | -0,979672304 |
| GSE40272 | X11196 | 4739 NEDD9       | -0,979338266 |
| GSE40272 | X37940 | 6300 MAPK12      | -0,977771142 |
| GSE40272 | X9842  | 83459 LOC83459   | -0,974520085 |
| GSE40272 | X24903 | 10994 ILVBL      | -0,973872622 |
| GSE40272 | X37774 | 389721 rab1c     | -0,973776427 |
| GSE40272 | X33872 | 3249 HPN         | -0,972779598 |
| GSE40272 | X40240 | 80169 CTC1       | -0,972468816 |
| GSE40272 | X32530 | 57140 RNPEPL1    | -0,971036998 |
| GSE40272 | X13752 | 4302 MLLT6       | -0,970609408 |
| GSE40272 | X19753 | 1371 CPOX        | -0,970291226 |
| GSE40272 | X27855 | 254102 EHBP1L1   | -0,970067125 |
| GSE40272 | X24895 | 2688 GH1         | -0,969883721 |
| GSE40272 | X15039 | 7706 TRIM25      | -0,968498943 |
| GSE40272 | X10601 | 4035 LRP1        | -0,968486786 |
| GSE40272 | X15912 | 23303 KIF13B     | -0,968140592 |
| GSE40272 | X41375 | 2934 GSN         | -0,966639535 |
| GSE40272 | X12771 | 79446 WDR25      | -0,966543869 |
| GSE40272 | X22549 | 7008 TEF         | -0,96627537  |
| GSE40272 | X38712 | 340318 LOC340318 | -0,965328753 |
| GSE40272 | X33445 | 4059 BCAM        | -0,961842495 |
| GSE40272 | X16284 | 10669 CGREF1     | -0,961730444 |
| GSE40272 | X35797 | 10994 ILVBL      | -0,960774841 |
| GSE40272 | X37662 | 1509 CTSD        | -0,960594609 |
| GSE40272 | X543   | 1938 EEF2        | -0,960486258 |
| GSE40272 | X25958 | 28965 SLC27A6    | -0,960403805 |
| GSE40272 | X20304 | 6,60E+04 TMEM108 | -0,959902748 |
| GSE40272 | X39241 | 22941 SHANK2     | -0,959585095 |
| GSE40272 | X37983 | 1057 CELP        | -0,958801268 |
| GSE40272 | X370   | 9545 RAB3D       | -0,958381078 |

# Supplementary\_table\_S3

|          |        |                  |              |
|----------|--------|------------------|--------------|
| GSE40272 | X9197  | 1265 CNN2        | -0,958354651 |
| GSE40272 | X4690  | 9261 MAPKAPK2    | -0,958064482 |
| GSE40272 | X6101  | 6733 SRPK2       | -0,957820296 |
| GSE40272 | X17247 | 1938 EEF2        | -0,956939746 |
| GSE40272 | X23213 | 90139 TSPAN18    | -0,955979387 |
| GSE40272 | X16629 | 64106 NPFFR1     | -0,955942389 |
| GSE40272 | X9883  | 145173 B3GALT    | -0,955731501 |
| GSE40272 | X19524 | 1856 DVL2        | -0,955618922 |
| GSE40272 | X38107 | 64781 CERK       | -0,95520296  |
| GSE40272 | X2364  | 5158 PDE6B       | -0,955004757 |
| GSE40272 | X16599 | 7881 KCNAB1      | -0,95484408  |
| GSE40272 | X31848 | 441841 LOC441841 | -0,95442389  |
| GSE40272 | X22287 | 3549 IHH         | -0,954384249 |
| GSE40272 | X42221 | 171017 ZNF384    | -0,95354704  |
| GSE40272 | X1472  | 4035 LRP1        | -0,953321353 |
| GSE40272 | X44415 | 80144 FRAS1      | -0,953174947 |
| GSE40272 | X37656 | 51150 SDF4       | -0,95261945  |
| GSE40272 | X21246 | 8567 MADD        | -0,952584038 |
| GSE40272 | X13220 | 2581 GALC        | -0,952555497 |
| GSE40272 | X39206 | 4176 MCM7        | -0,952486258 |
| GSE40272 | X3131  | 64755 C16orf58   | -0,95192019  |
| GSE40272 | X22630 | 5892 RAD51D      | -0,951520085 |
| GSE40272 | X32830 | 92070 C4orf42    | -0,950729915 |
| GSE40272 | X15227 | 28461 IGHV1-69   | -0,949986786 |
| GSE40272 | X4941  | 60370 AVPI1      | -0,949433932 |
| GSE40272 | X39369 | 4035 LRP1        | -0,948390063 |
| GSE40272 | X13936 | 2030 SLC29A1     | -0,947995243 |
| GSE40272 | X15809 | 811 CALR         | -0,947893235 |
| GSE40272 | X8054  | 3155 HMGCL       | -0,947168605 |
| GSE40272 | X2630  | 3728 JUP         | -0,947153277 |
| GSE40272 | X35363 | 1636 ACE         | -0,94639482  |
| GSE40272 | X37217 | 55080 TAPBPL     | -0,946198203 |
| GSE40272 | X30203 | 255512 LOC255512 | -0,946169662 |
| GSE40272 | X33869 | 5064 PALM        | -0,945805497 |
| GSE40272 | X1757  | 7108 TM7SF2      | -0,945791226 |
| GSE40272 | X24185 | 116966 WDR17     | -0,945553383 |
| GSE40272 | X25831 | 7052 TGM2        | -0,945266913 |
| GSE40272 | X13349 | 8864 PER2        | -0,943815011 |
| GSE40272 | X27739 | 23154 NCDN       | -0,943306025 |
| GSE40272 | X9164  | 57670 KIAA1549   | -0,943302854 |
| GSE40272 | X37302 | 4624 MYH6        | -0,942691332 |
| GSE40272 | X5175  | 9509 ADAMTS2     | -0,942228858 |
| GSE40272 | X15400 | 6080 SNORA73A    | -0,941915962 |
| GSE40272 | X34864 | 2850 GPR27       | -0,940557611 |
| GSE40272 | X29641 | 10840 ALDH1L1    | -0,940372093 |
| GSE40272 | X17061 | 9569 GTF2IRD1    | -0,940152748 |
| GSE40272 | X37276 | 348645 C22orf34  | -0,940114693 |
| GSE40272 | X18332 | 10903 MTMR11     | -0,93984408  |
| GSE40272 | X16657 | 283475 LOC283475 | -0,938914376 |
| GSE40272 | X15285 | 51116 MRPS2      | -0,938794926 |
| GSE40272 | X34657 | 1936 EEF1D       | -0,938682347 |
| GSE40272 | X27077 | 1788 DNMT3A      | -0,937791226 |
| GSE40272 | X3721  | 23286 WWC1       | -0,937337209 |



# Supplementary\_table\_S3

|          |        |                  |              |
|----------|--------|------------------|--------------|
| GSE40272 | X15547 | 64794 DDX31      | -0,934578753 |
| GSE40272 | X32094 | 4035 LRP1        | -0,934562896 |
| GSE40272 | X7268  | 2319 FLOT2       | -0,933650634 |
| GSE40272 | X18634 | 127731 VWA5B1    | -0,93355074  |
| GSE40272 | X14751 | 51005 AMDHD2     | -0,93342759  |
| GSE40272 | X16937 | 339829 CCDC39    | -0,932735201 |
| GSE40272 | X44075 | 84818 IL17RC     | -0,932695032 |
| GSE40272 | X5731  | 10570 DPYSL4     | -0,931391121 |
| GSE40272 | X33867 | 27343 POLL       | -0,93107981  |
| GSE40272 | X8700  | 26048 ZNF500     | -0,930878436 |
| GSE40272 | X26505 | 388491 LOC388491 | -0,930660148 |
| GSE40272 | X37222 | 64753 CCDC136    | -0,929974101 |
| GSE40272 | X41908 | 402505 LOC402505 | -0,92907241  |
| GSE40272 | X4275  | 3554 IL1R1       | -0,929030127 |
| GSE40272 | X24656 | 146310 RNF151    | -0,928971459 |
| GSE40272 | X6199  | 55898 UNC45A     | -0,928767442 |
| GSE40272 | X880   | 60343 FAM3A      | -0,92823203  |
| GSE40272 | X1666  | 2002 ELK1        | -0,927770085 |
| GSE40272 | X7651  | 89941 RHOT2      | -0,927678118 |
| GSE40272 | X9237  | 8313 AXIN2       | -0,927535412 |
| GSE40272 | X394   | 4035 LRP1        | -0,927521142 |
| GSE40272 | X2426  | 54982 CLN6       | -0,926811311 |
| GSE40272 | X41696 | 130497 OSR1      | -0,925721987 |
| GSE40272 | X7690  | 84164 ASCC2      | -0,925464588 |
| GSE40272 | X17238 | 10509 SEMA4B     | -0,925386364 |
| GSE40272 | X14979 | 57406 ABHD6      | -0,924476216 |
| GSE40272 | X9526  | 221336 BEND6     | -0,924196089 |
| GSE40272 | X9704  | 909 CD1A         | -0,922769027 |
| GSE40272 | X39308 | 80024 SLC24A6    | -0,922766913 |
| GSE40272 | X9721  | 29979 UBQLN1     | -0,921852008 |
| GSE40272 | X12908 | 25961 NUDT13     | -0,921721987 |
| GSE40272 | X18920 | 54991 C1orf159   | -0,921382135 |
| GSE40272 | X12453 | 57186 RALGAPA2   | -0,920976744 |
| GSE40272 | X37990 | 2996 GYPE        | -0,920803383 |
| GSE40272 | X37664 | 7094 TLN1        | -0,920749471 |
| GSE40272 | X30602 | 84767 SPRYD5     | -0,919964588 |
| GSE40272 | X28489 | 92359 CRB3       | -0,919621036 |
| GSE40272 | X28644 | 10072 DPP3       | -0,919495243 |
| GSE40272 | X38441 | 4035 LRP1        | -0,918272727 |
| GSE40272 | X44337 | 442365 LOC442365 | -0,916539112 |
| GSE40272 | X25903 | 3679 ITGA7       | -0,916506871 |
| GSE40272 | X41602 | 54815 GATAD2A    | -0,915821353 |
| GSE40272 | X800   | 80144 FRAS1      | -0,915496829 |
| GSE40272 | X16028 | 11252 PACSIN2    | -0,915483615 |
| GSE40272 | X9309  | 89958 C9orf140   | -0,915336152 |
| GSE40272 | X19424 | 116969 ART5      | -0,914698732 |
| GSE40272 | X38590 | 1938 EEF2        | -0,914488901 |
| GSE40272 | X5460  | 80144 FRAS1      | -0,913617865 |
| GSE40272 | X27545 | 6932 TCF7        | -0,912867865 |
| GSE40272 | X37938 | 56114 PCDHGA1    | -0,912595666 |
| GSE40272 | X17575 | 389310 LOC389310 | -0,911758457 |
| GSE40272 | X8907  | 125058 TBC1D16   | -0,911239429 |
| GSE40272 | X37250 | 378938 MALAT1    | -0,911214059 |

# Supplementary\_table\_S3

|          |        |                  |              |
|----------|--------|------------------|--------------|
| GSE40272 | X16047 | 2275 FHL3        | -0,9105037   |
| GSE40272 | X13776 | 79929 MAP6D1     | -0,910332981 |
| GSE40272 | X2385  | 120071 GYLTL1B   | -0,910326638 |
| GSE40272 | X6867  | 10585 POMT1      | -0,910320825 |
| GSE40272 | X20032 | 5430 POLR2A      | -0,910197674 |
| GSE40272 | X36463 | 51816 CECR1      | -0,909770085 |
| GSE40272 | X39913 | 91807 MYLK3      | -0,908882664 |
| GSE40272 | X43878 | 6928 HNF1B       | -0,908692389 |
| GSE40272 | X2661  | 10072 DPP3       | -0,907948203 |
| GSE40272 | X26444 | 79763 ISOC2      | -0,907373679 |
| GSE40272 | X38953 | 10214 SSX3       | -0,90667759  |
| GSE40272 | X19543 | 95 ACY1          | -0,906370507 |
| GSE40272 | X13046 | 1956 EGFR        | -0,905645877 |
| GSE40272 | X16583 | 399979 SNX19     | -0,905099894 |
| GSE40272 | X23254 | 375686 SPATC1    | -0,905090381 |
| GSE40272 | X20920 | 80144 FRAS1      | -0,905088266 |
| GSE40272 | X12600 | 7329 UBE2I       | -0,904613636 |
| GSE40272 | X36717 | 23218 NBEAL2     | -0,904003171 |
| GSE40272 | X37513 | 4035 LRP1        | -0,902794397 |
| GSE40272 | X39680 | 51444 RNF138     | -0,902449789 |
| GSE40272 | X5787  | 152831 KLB       | -0,902158034 |
| GSE40272 | X8402  | 92979 MARCH9     | -0,90126797  |
| GSE40272 | X2674  | 4013 VWA5A       | -0,901143235 |
| GSE40272 | X15037 | 441682 LOC441682 | -0,900937104 |
| GSE40272 | X30978 | 347734 SLC35B2   | -0,900469345 |
| GSE40272 | X31655 | 55193 PBRM1      | -0,900309725 |
| GSE40272 | X38177 | 2705 GJB1        | -0,899660677 |
| GSE40272 | X21244 | 23303 KIF13B     | -0,899330867 |
| GSE40272 | X40761 | 284297 SSC5D     | -0,899271142 |
| GSE40272 | X42345 | 79166 LILRP2     | -0,899131078 |
| GSE40272 | X20299 | 5157 PDGFRL      | -0,898915962 |
| GSE40272 | X34595 | 80144 FRAS1      | -0,898903277 |
| GSE40272 | X41058 | 3603 IL16        | -0,89855444  |
| GSE40272 | X16043 | 56999 ADAMTS9    | -0,89835518  |
| GSE40272 | X14885 | 29882 ANAPC2     | -0,897640063 |
| GSE40272 | X11645 | 1890 TYMP        | -0,897636364 |
| GSE40272 | X23743 | 4035 LRP1        | -0,896689218 |
| GSE40272 | X30208 | 55160 ARHGEF10L  | -0,895760042 |
| GSE40272 | X21634 | 5925 RB1         | -0,895210888 |
| GSE40272 | X24272 | 11156 PTP4A3     | -0,894827696 |
| GSE40272 | X31910 | 114899 C1QTNF3   | -0,893318182 |
| GSE40272 | X29901 | 2296 FOXC1       | -0,892715645 |
| GSE40272 | X36082 | 4833 NME4        | -0,892541226 |
| GSE40272 | X13609 | 9922 IQSEC1      | -0,892276427 |
| GSE40272 | X24375 | 51684 SUFU       | -0,892241543 |
| GSE40272 | X38779 | 755 C21orf2      | -0,891899577 |
| GSE40272 | X5582  | 83692 CD99L2     | -0,891745772 |
| GSE40272 | X19195 | 84720 PIGO       | -0,891117865 |
| GSE40272 | X33942 | 9618 TRAF4       | -0,89101797  |
| GSE40272 | X11280 | 64753 CCDC136    | -0,89096723  |
| GSE40272 | X31579 | 54976 C20orf27   | -0,890914905 |
| GSE40272 | X12608 | 4035 LRP1        | -0,890906977 |
| GSE40272 | X3940  | 3909 LAMA3       | -0,890840909 |

# Supplementary\_table\_S3

|          |        |                  |              |
|----------|--------|------------------|--------------|
| GSE40272 | X2648  | 57507 ZNF608     | -0,889144292 |
| GSE40272 | X26806 | 5600 MAPK11      | -0,888779598 |
| GSE40272 | X4225  | 442552 LOC442552 | -0,888418076 |
| GSE40272 | X26903 | 675 BRCA2        | -0,888339852 |
| GSE40272 | X7652  | 3909 LAMA3       | -0,888102537 |
| GSE40272 | X31857 | 4163 MCC         | -0,887984144 |
| GSE40272 | X43046 | 613 BCR          | -0,887676533 |
| GSE40272 | X40297 | 4035 LRP1        | -0,887217759 |
| GSE40272 | X5033  | 4035 LRP1        | -0,886907505 |
| GSE40272 | X3177  | 4035 LRP1        | -0,886179175 |
| GSE40272 | X17292 | 5089 PBX2        | -0,886092495 |
| GSE40272 | X9296  | 25970 SH2B1      | -0,885141649 |
| GSE40272 | X13737 | 869 CBLN1        | -0,884926533 |
| GSE40272 | X43027 | 54756 IL17RD     | -0,884736258 |
| GSE40272 | X14096 | 9894 TELO2       | -0,884406977 |
| GSE40272 | X2398  | 1509 CTSD        | -0,884157505 |
| GSE40272 | X17531 | 51599 LSR        | -0,883981501 |
| GSE40272 | X20564 | 390777 LOC390777 | -0,88395666  |
| GSE40272 | X40913 | 5819 PVRL2       | -0,883671776 |
| GSE40272 | X6656  | 51540 SCLY       | -0,88347093  |
| GSE40272 | X3790  | 25920 COBRA1     | -0,883133192 |
| GSE40272 | X9551  | 6932 TCF7        | -0,882385307 |
| GSE40272 | X28208 | 1087 CEACAM7     | -0,881942389 |
| GSE40272 | X39780 | 10072 DPP3       | -0,881160148 |
| GSE40272 | X38932 | 54434 SSH1       | -0,880581395 |
| GSE40272 | X35413 | 389655 RPL29P19  | -0,880448732 |
| GSE40272 | X43035 | 2747 GLUD2       | -0,879489429 |
| GSE40272 | X6277  | 163732 CITED4    | -0,879188161 |
| GSE40272 | X39239 | 51776 ZAK        | -0,878859937 |
| GSE40272 | X27081 | 78995 C17orf53   | -0,878596195 |
| GSE40272 | X1660  | 7798 LUZP1       | -0,878522727 |
| GSE40272 | X41157 | 5979 RET         | -0,878215116 |
| GSE40272 | X15830 | 340348 TSPAN33   | -0,878109937 |
| GSE40272 | X15011 | 64781 CERK       | -0,87754704  |
| GSE40272 | X1321  | 4035 LRP1        | -0,877495772 |
| GSE40272 | X27162 | 29988 SLC2A8     | -0,877385835 |
| GSE40272 | X33010 | 5339 PLEC        | -0,87730814  |
| GSE40272 | X28382 | 2934 GSN         | -0,876902748 |
| GSE40272 | X40919 | 255031 FLJ35390  | -0,876800211 |
| GSE40272 | X29825 | 339666 LOC339666 | -0,876595666 |
| GSE40272 | X12606 | 60 ACTB          | -0,876408034 |
| GSE40272 | X37757 | 4137 MAPT        | -0,875981501 |
| GSE40272 | X39520 | 7094 TLN1        | -0,875820296 |
| GSE40272 | X15722 | 28996 HIPK2      | -0,875346195 |
| GSE40272 | X26235 | 58525 WIZ        | -0,875150634 |
| GSE40272 | X18175 | 4035 LRP1        | -0,874958245 |
| GSE40272 | X39011 | 54458 PRR13      | -0,874720402 |
| GSE40272 | X9991  | 55731 C17orf63   | -0,874121564 |
| GSE40272 | X9674  | 4035 LRP1        | -0,874098837 |
| GSE40272 | X11679 | 1938 EEF2        | -0,874042812 |
| GSE40272 | X16282 | 398 ARHGDIG      | -0,874016385 |
| GSE40272 | X12205 | 57175 CORO1B     | -0,873354651 |
| GSE40272 | X4255  | 2934 GSN         | -0,873007928 |

# Supplementary\_table\_S3

|          |        |                      |              |
|----------|--------|----------------------|--------------|
| GSE40272 | X37253 | 10200 MPHOSPH6       | -0,872917019 |
| GSE40272 | X16970 | 2874 GPS2            | -0,872707188 |
| GSE40272 | X2494  | 1185 CLCN6           | -0,872377907 |
| GSE40272 | X4725  | 64006 ERVK-6         | -0,87194926  |
| GSE40272 | X23028 | 6468 FBXW4           | -0,871743129 |
| GSE40272 | X42530 | 54880 BCOR           | -0,870971987 |
| GSE40272 | X32303 | 6096 RORB            | -0,870948203 |
| GSE40272 | X33546 | 3916 LAMP1           | -0,870761628 |
| GSE40272 | X11245 | 9827 RGP1            | -0,870245772 |
| GSE40272 | X42128 | 23481 PES1           | -0,870239429 |
| GSE40272 | X18151 | 26855 RNU2-2         | -0,869334038 |
| GSE40272 | X29161 | 4035 LRP1            | -0,869195032 |
| GSE40272 | X29237 | 389390 LOC389390     | -0,868931818 |
| GSE40272 | X8230  | 81876 RAB1B          | -0,868459302 |
| GSE40272 | X3178  | 4035 LRP1            | -0,868399049 |
| GSE40272 | X36732 | 3145 HMBS            | -0,868280655 |
| GSE40272 | X16318 | 4035 LRP1            | -0,868262685 |
| GSE40272 | X393   | 7094 TLN1            | -0,868212474 |
| GSE40272 | X19384 | 10439 OLFM1          | -0,867906977 |
| GSE40272 | X15508 | 389722 CNTNAP3B-LIKE | -0,867713531 |
| GSE40272 | X20132 | 84904 C9orf100       | -0,867707717 |
| GSE40272 | X24888 | 442069 LOC442069     | -0,867700317 |
| GSE40272 | X13876 | 440703 LOC440703     | -0,867575581 |
| GSE40272 | X16605 | 55823 VPS11          | -0,867560782 |
| GSE40272 | X12868 | 54884 RETSAT         | -0,867077167 |
| GSE40272 | X26330 | 51005 AMDHD2         | -0,866639535 |
| GSE40272 | X2227  | 146760 RTN4RL1       | -0,866426004 |
| GSE40272 | X28386 | 441804 LOC441804     | -0,86635148  |
| GSE40272 | X640   | 2010 EMD             | -0,866317653 |
| GSE40272 | X14314 | 4035 LRP1            | -0,865705603 |
| GSE40272 | X8143  | 5929 RBBP5           | -0,865697674 |
| GSE40272 | X38855 | 1488 CTBP2           | -0,865223573 |
| GSE40272 | X25684 | 80144 FRAS1          | -0,864298097 |
| GSE40272 | X43146 | 5339 PLEC            | -0,864146934 |
| GSE40272 | X6826  | 1889 ECE1            | -0,863846723 |
| GSE40272 | X12704 | 65009 NDRG4          | -0,863766913 |
| GSE40272 | X7296  | 116984 ARAP2         | -0,863038584 |
| GSE40272 | X17166 | 30819 KCNIP2         | -0,862510042 |
| GSE40272 | X4074  | 10169 SERF2          | -0,86234778  |
| GSE40272 | X38575 | 260429 PRSS33        | -0,862345666 |
| GSE40272 | X35914 | 374875 HSD11B1L      | -0,862168605 |
| GSE40272 | X6031  | 81562 LMAN2L         | -0,861815011 |
| GSE40272 | X8757  | 5673 PSG5            | -0,861632664 |
| GSE40272 | X24765 | 80199 FUZ            | -0,861245772 |
| GSE40272 | X10899 | 90313 TP53I13        | -0,861216173 |
| GSE40272 | X12165 | 9238 TBRG4           | -0,861194503 |
| GSE40272 | X17606 | 375295 LOC375295     | -0,860717759 |
| GSE40272 | X18787 | 29995 LMCD1          | -0,860600951 |
| GSE40272 | X12210 | 389636 LOC389636     | -0,860570296 |
| GSE40272 | X13972 | 27097 TAF5L          | -0,860512685 |
| GSE40272 | X14313 | 4035 LRP1            | -0,86032981  |
| GSE40272 | X35805 | 1509 CTSD            | -0,859695032 |
| GSE40272 | X33576 | 51451 LCMT1          | -0,859270085 |

# Supplementary\_table\_S3

|          |        |                  |              |
|----------|--------|------------------|--------------|
| GSE40272 | X32840 | 3909 LAMA3       | -0,859257928 |
| GSE40272 | X42013 | 10555 AGPAT2     | -0,858853594 |
| GSE40272 | X22295 | 55721 IQCC       | -0,858817125 |
| GSE40272 | X1322  | 4035 LRP1        | -0,858637421 |
| GSE40272 | X34146 | 388823 LOC388823 | -0,858016385 |
| GSE40272 | X10352 | 28991 COMMD5     | -0,857758985 |
| GSE40272 | X6026  | 2889 RAPGEF1     | -0,857451374 |
| GSE40272 | X23124 | 29903 CCDC106    | -0,857335095 |
| GSE40272 | X11195 | 55145 THAP1      | -0,857298626 |
| GSE40272 | X20949 | 4056 LTC4S       | -0,857252114 |
| GSE40272 | X41650 | 26262 TSPAN17    | -0,85620296  |
| GSE40272 | X41673 | 2067 ERCC1       | -0,855960359 |
| GSE40272 | X32051 | 80144 FRAS1      | -0,855672304 |
| GSE40272 | X42089 | 388515 LOC388515 | -0,854941332 |
| GSE40272 | X13386 | 4035 LRP1        | -0,854764799 |
| GSE40272 | X14774 | 4069 LYZ         | -0,854748414 |
| GSE40272 | X38122 | 84885 ZDHHC12    | -0,854360994 |
| GSE40272 | X5962  | 4035 LRP1        | -0,853825581 |
| GSE40272 | X42095 | 140775 SMCR8     | -0,85370296  |
| GSE40272 | X23097 | 84222 TMEM191A   | -0,853593552 |
| GSE40272 | X33128 | 1066 CES1        | -0,852813425 |
| GSE40272 | X806   | 6453 ITSN1       | -0,852281184 |
| GSE40272 | X41483 | 442327 LOC442327 | -0,852092495 |
| GSE40272 | X43047 | 80144 FRAS1      | -0,852077696 |
| GSE40272 | X5915  | 5781 PTPN11      | -0,851935518 |
| GSE40272 | X21819 | 9229 DLGAP1      | -0,851913319 |
| GSE40272 | X16727 | 391705 LOC391705 | -0,851866279 |
| GSE40272 | X39126 | 8061 FOSL1       | -0,851707717 |
| GSE40272 | X23347 | 6901 TAZ         | -0,851349894 |
| GSE40272 | X12607 | 4035 LRP1        | -0,851215645 |
| GSE40272 | X14657 | 348932 SLC6A18   | -0,850945032 |
| GSE40272 | X34711 | 80789 INTS5      | -0,850919133 |
| GSE40272 | X11922 | 117584 RFFL      | -0,850906977 |
| GSE40272 | X18711 | 4242 MFNG        | -0,850886892 |
| GSE40272 | X20646 | 148490 LOC148490 | -0,850561311 |
| GSE40272 | X44120 | 9150 CTDP1       | -0,850382135 |
| GSE40272 | X12169 | 23598 PATZ1      | -0,850330338 |
| GSE40272 | X42304 | 4035 LRP1        | -0,849587738 |
| GSE40272 | X5669  | 64072 CDH23      | -0,849147463 |
| GSE40272 | X15816 | 254773 LYG2      | -0,849095666 |
| GSE40272 | X23780 | 80144 FRAS1      | -0,84855074  |
| GSE40272 | X12947 | 4733 DRG1        | -0,848233615 |
| GSE40272 | X17733 | 6405 SEMA3F      | -0,848073467 |
| GSE40272 | X35808 | 7094 TLN1        | -0,84769926  |
| GSE40272 | X11939 | 6872 TAF1        | -0,847647463 |
| GSE40272 | X24696 | 116985 ARAP1     | -0,847331395 |
| GSE40272 | X17802 | 5589 PRKCSH      | -0,847145349 |
| GSE40272 | X43966 | 10360 NPM3       | -0,847049683 |
| GSE40272 | X34120 | 9973 CCS         | -0,846955603 |
| GSE40272 | X7199  | 63894 VIPAR      | -0,846926533 |
| GSE40272 | X23553 | 55700 MAP7D1     | -0,846838266 |
| GSE40272 | X33778 | 10421 CD2BP2     | -0,846629493 |
| GSE40272 | X11985 | 63027 SLC22A23   | -0,846437632 |

# Supplementary\_table\_S3

|          |        |                  |              |
|----------|--------|------------------|--------------|
| GSE40272 | X28008 | 7464 CORO2A      | -0,845959302 |
| GSE40272 | X26527 | 2934 GSN         | -0,845821353 |
| GSE40272 | X335   | 22933 SIRT2      | -0,845233087 |
| GSE40272 | X31806 | 64854 USP46      | -0,844727273 |
| GSE40272 | X542   | 5430 POLR2A      | -0,844400634 |
| GSE40272 | X34649 | 26523 EIF2C1     | -0,844331924 |
| GSE40272 | X36733 | 1938 EEF2        | -0,844146406 |
| GSE40272 | X9414  | 83549 UCK1       | -0,843683932 |
| GSE40272 | X11530 | 4035 LRP1        | -0,842959831 |
| GSE40272 | X26508 | 1445 CSK         | -0,842571353 |
| GSE40272 | X35427 | 311 ANXA11       | -0,842454017 |
| GSE40272 | X38709 | 2703 GJA8        | -0,842216173 |
| GSE40272 | X36492 | 286077 FAM83H    | -0,842022199 |
| GSE40272 | X44442 | 92659 LOC92659   | -0,842012685 |
| GSE40272 | X44285 | 8612 PPAP2C      | -0,841931818 |
| GSE40272 | X23467 | 10840 ALDH1L1    | -0,840539112 |
| GSE40272 | X13502 | 340947 LOC340947 | -0,840285412 |
| GSE40272 | X19024 | 23476 BRD4       | -0,840264271 |
| GSE40272 | X37981 | 26088 GGA1       | -0,840168076 |
| GSE40272 | X4572  | 51257 MARCH2     | -0,839755285 |
| GSE40272 | X1462  | 284361 C19orf63  | -0,839570825 |
| GSE40272 | X11299 | 84264 HAGHL      | -0,839538584 |
| GSE40272 | X44009 | 4035 LRP1        | -0,839345137 |
| GSE40272 | X13683 | 20 ABCA2         | -0,8390037   |
| GSE40272 | X17279 | 63943 FKBPL      | -0,838993129 |
| GSE40272 | X36585 | 4035 LRP1        | -0,838883721 |
| GSE40272 | X41691 | 50512 PODXL2     | -0,838862579 |
| GSE40272 | X8322  | 11282 MGAT4B     | -0,838791755 |
| GSE40272 | X30559 | 10220 GDF11      | -0,838745772 |
| GSE40272 | X37653 | 2534 FYN         | -0,838578753 |
| GSE40272 | X37893 | 92799 SHKBP1     | -0,838562368 |
| GSE40272 | X461   | 5214 PFKP        | -0,837494715 |
| GSE40272 | X12919 | 339779 C2orf53   | -0,837465645 |
| GSE40272 | X15950 | 56850 GRIPAP1    | -0,837285941 |
| GSE40272 | X31166 | 1938 EEF2        | -0,837283827 |
| GSE40272 | X41664 | 27239 GPR162     | -0,837021142 |
| GSE40272 | X1606  | 388507 ZNF788    | -0,836680233 |
| GSE40272 | X4870  | 64601 VPS16      | -0,836664376 |
| GSE40272 | X28238 | 3145 HMBS        | -0,83655074  |
| GSE40272 | X1153  | 23224 SYNE2      | -0,835332981 |
| GSE40272 | X11171 | 3757 KCNH2       | -0,834730973 |
| GSE40272 | X34434 | 55313 CPPED1     | -0,834557082 |
| GSE40272 | X37372 | 55735 DNAJC11    | -0,833815539 |
| GSE40272 | X2208  | 51548 SIRT6      | -0,833447674 |
| GSE40272 | X37173 | 441742 LOC441742 | -0,833406448 |
| GSE40272 | X43622 | 3145 HMBS        | -0,833341438 |
| GSE40272 | X20392 | 6927 HNF1A       | -0,833093023 |
| GSE40272 | X28483 | 131973 LOC131973 | -0,832645349 |
| GSE40272 | X21812 | 1499 CTNNA1      | -0,831663319 |
| GSE40272 | X1471  | 4035 LRP1        | -0,831530127 |
| GSE40272 | X20183 | 11076 TPPP       | -0,831438161 |
| GSE40272 | X15810 | 10554 AGPAT1     | -0,830204017 |
| GSE40272 | X35154 | 79960 PHF17      | -0,830124207 |

# Supplementary\_table\_S3

|          |        |                  |              |
|----------|--------|------------------|--------------|
| GSE40272 | X23184 | 140807 KRT72     | -0,829966702 |
| GSE40272 | X30790 | 10072 DPP3       | -0,82994926  |
| GSE40272 | X38906 | 6452 SH3BP2      | -0,829930761 |
| GSE40272 | X33943 | 84993 UBL7       | -0,829670719 |
| GSE40272 | X7582  | 388552 BLOC1S3   | -0,829291226 |
| GSE40272 | X8993  | 23216 TBC1D1     | -0,829158562 |
| GSE40272 | X26455 | 9993 DGCR2       | -0,828733087 |
| GSE40272 | X21462 | 4163 MCC         | -0,828591966 |
| GSE40272 | X14083 | 10807 SDCCAG3    | -0,828478858 |
| GSE40272 | X31017 | 4035 LRP1        | -0,828379493 |
| GSE40272 | X33603 | 8844 KSR1        | -0,828147992 |
| GSE40272 | X22436 | 1983 EIF5        | -0,828139535 |
| GSE40272 | X12858 | 56999 ADAMTS9    | -0,827966173 |
| GSE40272 | X25260 | 116729 DYSFIP1   | -0,827559725 |
| GSE40272 | X5184  | 7094 TLN1        | -0,827531712 |
| GSE40272 | X272   | 26577 PCOLCE2    | -0,827488372 |
| GSE40272 | X14020 | 2067 ERCC1       | -0,826675476 |
| GSE40272 | X1081  | 951 CD37         | -0,826640592 |
| GSE40272 | X41488 | 775 CACNA1C      | -0,826630021 |
| GSE40272 | X42425 | 4299 AFF1        | -0,826407505 |
| GSE40272 | X36484 | 3156 HMGCR       | -0,826376321 |
| GSE40272 | X24652 | 79672 FN3KRP     | -0,825811839 |
| GSE40272 | X9931  | 1307 COL16A1     | -0,825415433 |
| GSE40272 | X18848 | 2802 GOLGA3      | -0,825228858 |
| GSE40272 | X25900 | 10922 FASTK      | -0,825114693 |
| GSE40272 | X11979 | 10994 ILVBL      | -0,825084567 |
| GSE40272 | X7671  | 7074 TIAM1       | -0,824967759 |
| GSE40272 | X33512 | 84364 ARFGAP2    | -0,824786469 |
| GSE40272 | X25205 | 6550 SLC9A3      | -0,824553911 |
| GSE40272 | X2895  | 119764 OR4X2     | -0,824371564 |
| GSE40272 | X22150 | 10072 DPP3       | -0,823878436 |
| GSE40272 | X35246 | 5625 PRODH       | -0,823806554 |
| GSE40272 | X20034 | 441404 LOC441404 | -0,82307241  |
| GSE40272 | X22814 | 1938 EEF2        | -0,823055497 |
| GSE40272 | X40766 | 80727 TTYH3      | -0,822198732 |
| GSE40272 | X12468 | 284904 SEC14L4   | -0,822136892 |
| GSE40272 | X21785 | 780 DDR1         | -0,821475687 |
| GSE40272 | X2614  | 25803 SPDEF      | -0,820855708 |
| GSE40272 | X3523  | 389816 LRRC26    | -0,820612051 |
| GSE40272 | X34697 | 55168 MRPS18A    | -0,820524313 |
| GSE40272 | X28875 | 388474 RPL7AP66  | -0,820067653 |
| GSE40272 | X25860 | 6799 SULT1A2     | -0,81979334  |
| GSE40272 | X20985 | 5296 PIK3R2      | -0,819698203 |
| GSE40272 | X30071 | 8501 SLC43A1     | -0,81954704  |
| GSE40272 | X31441 | 596 BCL2         | -0,819521142 |
| GSE40272 | X30156 | 4782 NFIC        | -0,819510571 |
| GSE40272 | X34257 | 64847 SPATA20    | -0,819212474 |
| GSE40272 | X24230 | 2972 BRF1        | -0,818977273 |
| GSE40272 | X7457  | 30813 VSX1       | -0,818678118 |
| GSE40272 | X15327 | 221687 RNF182    | -0,818554968 |
| GSE40272 | X13764 | 10910 SUGT1      | -0,818371036 |
| GSE40272 | X16621 | 51599 LSR        | -0,818271142 |
| GSE40272 | X18833 | 22877 MLXIP      | -0,817512685 |

# Supplementary\_table\_S3

|          |        |                  |              |
|----------|--------|------------------|--------------|
| GSE40272 | X23770 | 78987 CRELD1     | -0,816836681 |
| GSE40272 | X16683 | 347265 KRT8P11   | -0,816739958 |
| GSE40272 | X22757 | 4297 MLL         | -0,816577696 |
| GSE40272 | X24971 | 3909 LAMA3       | -0,816301268 |
| GSE40272 | X12336 | 2874 GPS2        | -0,81613055  |
| GSE40272 | X18978 | 2055 CLN8        | -0,815899577 |
| GSE40272 | X34976 | 23498 HAAO       | -0,814654863 |
| GSE40272 | X20687 | 22885 ABLIM3     | -0,814479387 |
| GSE40272 | X34561 | 444 ASPH         | -0,814384778 |
| GSE40272 | X37134 | 147646 LOC147646 | -0,814001586 |
| GSE40272 | X34659 | 1855 DVL1        | -0,813370507 |
| GSE40272 | X21490 | 382 ARF6         | -0,81215592  |
| GSE40272 | X41813 | 3069 HDLBP       | -0,812141649 |
| GSE40272 | X3615  | 65990 FAM173A    | -0,812112579 |
| GSE40272 | X43378 | 4046 LSP1        | -0,811770085 |
| GSE40272 | X541   | 2934 GSN         | -0,811734144 |
| GSE40272 | X35151 | 5585 PKN1        | -0,811161205 |
| GSE40272 | X6111  | 1938 EEF2        | -0,810849894 |
| GSE40272 | X30927 | 1468 SLC25A10    | -0,810717759 |
| GSE40272 | X10847 | 9817 KEAP1       | -0,81015592  |
| GSE40272 | X816   | 1307 COL16A1     | -0,809451903 |
| GSE40272 | X35368 | 54880 BCOR       | -0,809264271 |
| GSE40272 | X10058 | 4123 MAN2C1      | -0,808829281 |
| GSE40272 | X12457 | 4035 LRP1        | -0,808356765 |
| GSE40272 | X32282 | 388760 LOC388760 | -0,807798097 |
| GSE40272 | X9173  | 30827 CXXC1      | -0,807293869 |
| GSE40272 | X7188  | 1104 RCC1        | -0,806276427 |
| GSE40272 | X15031 | 56342 PPAN       | -0,806248414 |
| GSE40272 | X19924 | 256880 LOC256880 | -0,805642178 |
| GSE40272 | X14680 | 1455 CSNK1G2     | -0,805476744 |
| GSE40272 | X9722  | 64924 SLC30A5    | -0,805196089 |
| GSE40272 | X15391 | 2934 GSN         | -0,805139535 |
| GSE40272 | X23451 | 8864 PER2        | -0,804727273 |
| GSE40272 | X3326  | 1938 EEF2        | -0,80470666  |
| GSE40272 | X21872 | 90993 CREB3L1    | -0,804319239 |
| GSE40272 | X13152 | 80305 TRABD      | -0,80384778  |
| GSE40272 | X37490 | 10421 CD2BP2     | -0,803730444 |
| GSE40272 | X27556 | 91695 RRP7B      | -0,803253171 |
| GSE40272 | X16687 | 440368 LOC440368 | -0,803045455 |
| GSE40272 | X7433  | 23308 ICOSLG     | -0,802764799 |
| GSE40272 | X39003 | 9967 THRAP3      | -0,802716173 |
| GSE40272 | X2639  | 6499 SKIV2L      | -0,80232611  |
| GSE40272 | X38344 | 9441 MED26       | -0,801779598 |
| GSE40272 | X19639 | 57224 NHSL1      | -0,801378964 |
| GSE40272 | X2250  | 4035 LRP1        | -0,801300211 |
| GSE40272 | X12839 | 8864 PER2        | -0,801146406 |
| GSE40272 | X7810  | 2582 GALE        | -0,800486786 |
| GSE40272 | X26726 | 3623 INHA        | -0,800364165 |
| GSE40272 | X2317  | 26470 SEZ6L2     | -0,799714059 |
| GSE40272 | X108   | 54498 SMOX       | -0,799328753 |
| GSE40272 | X31470 | 57147 SCYL3      | -0,799033298 |
| GSE40272 | X17245 | 4035 LRP1        | -0,79902167  |
| GSE40272 | X10020 | 64428 NARFL      | -0,798765328 |



# Supplementary\_table\_S3

|          |        |                   |              |
|----------|--------|-------------------|--------------|
| GSE40272 | X35847 | 10994 ILVBL       | -0,798637421 |
| GSE40272 | X10083 | 5433 POLR2D       | -0,798342495 |
| GSE40272 | X39609 | 10554 AGPAT1      | -0,798187632 |
| GSE40272 | X13735 | 57644 MYH7B       | -0,79801797  |
| GSE40272 | X31913 | 10588 MTHFS       | -0,797003171 |
| GSE40272 | X13236 | 6484 ST3GAL4      | -0,796488901 |
| GSE40272 | X14518 | 339448 C1orf174   | -0,795782241 |
| GSE40272 | X33949 | 5430 POLR2A       | -0,795515856 |
| GSE40272 | X42312 | 401578 LOC401578  | -0,795352008 |
| GSE40272 | X24777 | 79144 PPDPF       | -0,794026956 |
| GSE40272 | X19316 | 6461 SHB          | -0,793994715 |
| GSE40272 | X31814 | 80144 FRAS1       | -0,793702431 |
| GSE40272 | X11655 | 3614 IMPDH1       | -0,793294926 |
| GSE40272 | X29276 | 3340 NDST1        | -0,792885835 |
| GSE40272 | X6639  | 153090 DAB2IP     | -0,792783298 |
| GSE40272 | X22535 | 7551 ZNF3         | -0,79242759  |
| GSE40272 | X12012 | 79932 KIAA0319L   | -0,792307611 |
| GSE40272 | X30866 | 3993 LLGL2        | -0,79178277  |
| GSE40272 | X22324 | 80325 ABTB1       | -0,791696089 |
| GSE40272 | X20018 | 7205 TRIP6        | -0,791618922 |
| GSE40272 | X33868 | 57655 GRAMD1A     | -0,791473044 |
| GSE40272 | X33016 | 1889 ECE1         | -0,791404334 |
| GSE40272 | X33914 | 10749 KIF1C       | -0,791067653 |
| GSE40272 | X41914 | 140801 RPL10L     | -0,790639006 |
| GSE40272 | X4287  | 84766 EFCAB4B     | -0,790512685 |
| GSE40272 | X38209 | 3300 DNAJB2       | -0,790413319 |
| GSE40272 | X8197  | 29781 NCAPH2      | -0,790224101 |
| GSE40272 | X15389 | 1938 EEF2         | -0,790208774 |
| GSE40272 | X42854 | 5873 RAB27A       | -0,790001057 |
| GSE40272 | X14440 | 353333 KRTAP10-10 | -0,789405391 |
| GSE40272 | X24766 | 25915 NDUFAF3     | -0,789158034 |
| GSE40272 | X33057 | 23678 SGK3        | -0,788739958 |
| GSE40272 | X27981 | 2593 GAMT         | -0,788382664 |
| GSE40272 | X20123 | 2067 ERCC1        | -0,788222516 |
| GSE40272 | X29592 | 3707 ITPKB        | -0,787930761 |
| GSE40272 | X5968  | 310 ANXA7         | -0,7875074   |
| GSE40272 | X38562 | 26819 SNORD32A    | -0,787410677 |
| GSE40272 | X5761  | 3425 IDUA         | -0,787040169 |
| GSE40272 | X35391 | 89882 TPD52L3     | -0,786892706 |
| GSE40272 | X13802 | 10882 C1QL1       | -0,786714059 |
| GSE40272 | X41523 | 5590 PRKCZ        | -0,785840381 |
| GSE40272 | X16026 | 8864 PER2         | -0,785638478 |
| GSE40272 | X17146 | 84557 MAP1LC3A    | -0,785622093 |
| GSE40272 | X21623 | 80014 WWC2        | -0,785265328 |
| GSE40272 | X28207 | 389049 LOC389049  | -0,78515592  |
| GSE40272 | X19178 | 151742 PPM1L      | -0,785111522 |
| GSE40272 | X15392 | 4035 LRP1         | -0,784878436 |
| GSE40272 | X33488 | 80256 KIAA1539    | -0,784816068 |
| GSE40272 | X22634 | 390121 LOC390121  | -0,783975687 |
| GSE40272 | X31715 | 818 CAMK2G        | -0,783947146 |
| GSE40272 | X5253  | 23417 MLYCD       | -0,783913848 |
| GSE40272 | X17224 | 3216 HOXB6        | -0,783715116 |
| GSE40272 | X12598 | 200186 CRTCL2     | -0,783692389 |

# Supplementary\_table\_S3

|          |        |                  |              |
|----------|--------|------------------|--------------|
| GSE40272 | X9810  | 54475 NLE1       | -0,783150634 |
| GSE40272 | X24043 | 7260 TSSC1       | -0,782780655 |
| GSE40272 | X30468 | 5992 RFX4        | -0,782371036 |
| GSE40272 | X34696 | 10994 ILVBL      | -0,782367865 |
| GSE40272 | X20514 | 6132 RPL8        | -0,782216173 |
| GSE40272 | X12458 | 4035 LRP1        | -0,782189746 |
| GSE40272 | X42948 | 55898 UNC45A     | -0,782167548 |
| GSE40272 | X101   | 6472 SHMT2       | -0,781571353 |
| GSE40272 | X37287 | 51734 SEPX1      | -0,781513214 |
| GSE40272 | X14456 | 2934 GSN         | -0,781408034 |
| GSE40272 | X15102 | 23095 KIF1B      | -0,781368393 |
| GSE40272 | X10918 | 1384 CRAT        | -0,780950846 |
| GSE40272 | X19540 | 55851 PSENEN     | -0,780439746 |
| GSE40272 | X28914 | 388906 LOC388906 | -0,780347252 |
| GSE40272 | X6541  | 27085 MTBP       | -0,779962474 |
| GSE40272 | X24139 | 399933 LOC399933 | -0,779614165 |
| GSE40272 | X34514 | 10527 IPO7       | -0,779469345 |
| GSE40272 | X32192 | 8085 MLL2        | -0,779376321 |
| GSE40272 | X20030 | 2934 GSN         | -0,779340909 |
| GSE40272 | X9823  | 2934 GSN         | -0,779256871 |
| GSE40272 | X32188 | 80144 FRAS1      | -0,779184461 |
| GSE40272 | X3887  | 22838 RNF44      | -0,77862685  |
| GSE40272 | X5672  | 55898 UNC45A     | -0,778618393 |
| GSE40272 | X42396 | 7335 UBE2V1      | -0,778354651 |
| GSE40272 | X31692 | 164 AP1G1        | -0,777937104 |
| GSE40272 | X4278  | 79759 ZNF668     | -0,777893235 |
| GSE40272 | X8892  | 3145 HMBS        | -0,77778277  |
| GSE40272 | X4995  | 23095 KIF1B      | -0,777768499 |
| GSE40272 | X22825 | 80856 KIAA1715   | -0,777651691 |
| GSE40272 | X4701  | 8864 PER2        | -0,777381078 |
| GSE40272 | X7254  | 10907 TXNL4A     | -0,777248414 |
| GSE40272 | X21738 | 4035 LRP1        | -0,776814482 |
| GSE40272 | X19758 | 1459 CSNK2A2     | -0,7767426   |
| GSE40272 | X17338 | 84957 RELT       | -0,776613108 |
| GSE40272 | X5866  | 129303 TMEM150A  | -0,776458774 |
| GSE40272 | X34255 | 23181 DIP2A      | -0,776413319 |
| GSE40272 | X29116 | 4791 NFKB2       | -0,776306025 |
| GSE40272 | X23368 | 81 ACTN4         | -0,776151691 |
| GSE40272 | X34161 | 389458 LOC389458 | -0,776036998 |
| GSE40272 | X17248 | 5430 POLR2A      | -0,775466173 |
| GSE40272 | X5795  | 5297 PI4KA       | -0,775162262 |
| GSE40272 | X9442  | 23001 WDFY3      | -0,775013742 |
| GSE40272 | X37580 | 8425 LTBP4       | -0,774634249 |
| GSE40272 | X21299 | 440036 LOC440036 | -0,77463055  |
| GSE40272 | X16535 | 5830 PEX5        | -0,774556554 |
| GSE40272 | X11878 | 347732 CATSPER3  | -0,774481501 |
| GSE40272 | X23835 | 126119 JOSD2     | -0,774314482 |
| GSE40272 | X29345 | 5802 PTPRS       | -0,774204017 |
| GSE40272 | X28040 | 349633 C11orf34  | -0,773842495 |
| GSE40272 | X20950 | 64601 VPS16      | -0,773709831 |
| GSE40272 | X11333 | 22870 PPP6R1     | -0,773653805 |
| GSE40272 | X30994 | 89872 AQP10      | -0,773555497 |
| GSE40272 | X36227 | 8890 EIF2B4      | -0,773511099 |

# Supplementary\_table\_S3

|          |        |                  |              |
|----------|--------|------------------|--------------|
| GSE40272 | X19385 | 84222 TMEM191A   | -0,7735      |
| GSE40272 | X11697 | 10999 SLC27A4    | -0,77325     |
| GSE40272 | X8281  | 6917 TCEA1       | -0,772921776 |
| GSE40272 | X13089 | 1627 DBN1        | -0,772787526 |
| GSE40272 | X6209  | 64946 CENPH      | -0,772672833 |
| GSE40272 | X14462 | 1938 EEF2        | -0,772223573 |
| GSE40272 | X30099 | 27320 TNRC18B    | -0,772070296 |
| GSE40272 | X22918 | 402280 LOC402280 | -0,771993129 |
| GSE40272 | X1575  | 441915 LOC441915 | -0,771991015 |
| GSE40272 | X27878 | 5792 PTPRF       | -0,77145666  |
| GSE40272 | X40427 | 53947 A4GALT     | -0,771381078 |
| GSE40272 | X13385 | 7094 TLN1        | -0,771274841 |
| GSE40272 | X20810 | 4035 LRP1        | -0,771156448 |
| GSE40272 | X11678 | 5430 POLR2A      | -0,770969873 |
| GSE40272 | X9313  | 118426 LOH12CR1  | -0,7699963   |
| GSE40272 | X28334 | 50674 NEUROG3    | -0,769850951 |
| GSE40272 | X23099 | 3155 HMGCL       | -0,769645877 |
| GSE40272 | X21188 | 706 TSPO         | -0,769595137 |
| GSE40272 | X41153 | 3268 AGFG2       | -0,769275899 |
| GSE40272 | X8675  | 1855 DVL1        | -0,769075053 |
| GSE40272 | X12200 | 23135 KDM6B      | -0,768906448 |
| GSE40272 | X9744  | 116984 ARAP2     | -0,76854334  |
| GSE40272 | X2390  | 10312 TCIRG1     | -0,767922833 |
| GSE40272 | X17354 | 387643 LOC387643 | -0,767907505 |
| GSE40272 | X10268 | 8720 MBTPS1      | -0,767241543 |
| GSE40272 | X17989 | 23556 PIGN       | -0,767046512 |
| GSE40272 | X15652 | 5680 PSG11       | -0,766930761 |
| GSE40272 | X17306 | 84524 ZC3H8      | -0,766774313 |
| GSE40272 | X39518 | 4035 LRP1        | -0,766719345 |
| GSE40272 | X37350 | 55671 SMEK1      | -0,766634249 |
| GSE40272 | X1080  | 10552 ARPC1A     | -0,766378436 |
| GSE40272 | X35301 | 441033 LOC441033 | -0,76583351  |
| GSE40272 | X3110  | 40 ACCN1         | -0,765502114 |
| GSE40272 | X5800  | 23163 GGA3       | -0,765502114 |
| GSE40272 | X37649 | 283899 INO80E    | -0,765223044 |
| GSE40272 | X27991 | 22906 TRAK1      | -0,765162262 |
| GSE40272 | X10898 | 23215 PRRC2C     | -0,764638478 |
| GSE40272 | X14777 | 2629 GBA         | -0,763567125 |
| GSE40272 | X41330 | 54503 ZDHHC13    | -0,763098309 |
| GSE40272 | X22409 | 170958 ZNF525    | -0,763004228 |
| GSE40272 | X25562 | 79006 METRN      | -0,762422833 |
| GSE40272 | X40998 | 6300 MAPK12      | -0,762348309 |
| GSE40272 | X15874 | 9770 RASSF2      | -0,762273784 |
| GSE40272 | X40430 | 26608 TBL2       | -0,761338266 |
| GSE40272 | X1561  | 6687 SPG7        | -0,760966173 |
| GSE40272 | X41336 | 5051 PAFAH2      | -0,760854123 |
| GSE40272 | X16864 | 81628 TSC22D4    | -0,7607426   |
| GSE40272 | X28197 | 64794 DDX31      | -0,76069556  |
| GSE40272 | X2518  | 375775 PNPLA7    | -0,760604651 |
| GSE40272 | X5487  | 84971 ATG4D      | -0,76057241  |
| GSE40272 | X24661 | 6525 SMTN        | -0,760266913 |
| GSE40272 | X12502 | 441054 C4orf47   | -0,760215645 |
| GSE40272 | X38199 | 9583 ENTPD4      | -0,759943446 |

# Supplementary\_table\_S3

|          |        |                  |              |
|----------|--------|------------------|--------------|
| GSE40272 | X38396 | 54815 GATAD2A    | -0,759791226 |
| GSE40272 | X30228 | 64400 AKTIP      | -0,759669662 |
| GSE40272 | X6208  | 9344 TAOX2       | -0,759615222 |
| GSE40272 | X43387 | 11060 WWP2       | -0,759489958 |
| GSE40272 | X29942 | 392539 LOC392539 | -0,759029598 |
| GSE40272 | X6888  | 83985 SPNS1      | -0,758852537 |
| GSE40272 | X34880 | 4035 LRP1        | -0,758781712 |
| GSE40272 | X22744 | 10629 TAF6L      | -0,758762685 |
| GSE40272 | X17954 | 51011 FAHD2A     | -0,758475159 |
| GSE40272 | X8745  | 4035 LRP1        | -0,758317125 |
| GSE40272 | X33952 | 7094 TLN1        | -0,757669662 |
| GSE40272 | X39051 | 27434 POLM       | -0,75758351  |
| GSE40272 | X22014 | 91039 DPP9       | -0,757494715 |
| GSE40272 | X4868  | 55227 LRRC1      | -0,757216702 |
| GSE40272 | X42574 | 286102 TMED10P1  | -0,756369979 |
| GSE40272 | X19108 | 219293 ATAD3C    | -0,755715116 |
| GSE40272 | X2427  | 10972 TMED10     | -0,755483087 |
| GSE40272 | X7481  | 23224 SYNE2      | -0,755252114 |
| GSE40272 | X1573  | 57085 AGTRAP     | -0,754921776 |
| GSE40272 | X42450 | 57662 CAMSAP3    | -0,754514799 |
| GSE40272 | X35149 | 203074 PRSS55    | -0,754513742 |
| GSE40272 | X20960 | 4035 LRP1        | -0,754179175 |
| GSE40272 | X42936 | 55362 TMEM63B    | -0,754096195 |
| GSE40272 | X20009 | 23786 BCL2L13    | -0,753955603 |
| GSE40272 | X23312 | 27 ABL2          | -0,753895349 |
| GSE40272 | X19551 | 203228 C9orf72   | -0,75387315  |
| GSE40272 | X23611 | 6649 SOD3        | -0,753839323 |
| GSE40272 | X17641 | 8864 PER2        | -0,753789641 |
| GSE40272 | X41465 | 4052 LTBP1       | -0,753192918 |
| GSE40272 | X8413  | 8864 PER2        | -0,752968816 |
| GSE40272 | X16976 | 54904 WHSC1L1    | -0,752522199 |
| GSE40272 | X33862 | 171019 ADAMTS19  | -0,75243129  |
| GSE40272 | X7628  | 3191 HNRNPL      | -0,752233087 |
| GSE40272 | X21886 | 1509 CTSD        | -0,751363108 |
| GSE40272 | X19562 | 84065 TMEM222    | -0,751187104 |
| GSE40272 | X16652 | 6041 RNASEL      | -0,751045983 |
| GSE40272 | X42566 | 3268 AGFG2       | -0,750266385 |
| GSE40272 | X37479 | 80222 TARS2      | -0,749997886 |
| GSE40272 | X5928  | 23001 WDFY3      | -0,749896406 |
| GSE40272 | X29947 | 3386 ICAM4       | -0,749642706 |
| GSE40272 | X5490  | 5534 PPP3R1      | -0,749605708 |
| GSE40272 | X28552 | 6502 SKP2        | -0,748938689 |
| GSE40272 | X5639  | 26809 SNORD42A   | -0,748704017 |
| GSE40272 | X42833 | 6853 SYN1        | -0,748370507 |
| GSE40272 | X39731 | 10916 MAGED2     | -0,748253171 |
| GSE40272 | X16718 | 84132 USP42      | -0,747958774 |
| GSE40272 | X28406 | 55079 FEZF2      | -0,747538584 |
| GSE40272 | X18914 | 1956 EGFR        | -0,747444503 |
| GSE40272 | X5287  | 442407 LOC442407 | -0,747186575 |
| GSE40272 | X5182  | 4035 LRP1        | -0,747156448 |
| GSE40272 | X35041 | 377711 LOC377711 | -0,74671723  |
| GSE40272 | X35800 | 6899 TBX1        | -0,746709831 |
| GSE40272 | X38322 | 207 AKT1         | -0,746683404 |

# Supplementary\_table\_S3

|          |        |                  |              |
|----------|--------|------------------|--------------|
| GSE40272 | X32207 | 401848 LOC401848 | -0,746642178 |
| GSE40272 | X10742 | 57060 PCBP4      | -0,746615222 |
| GSE40272 | X41225 | 4035 LRP1        | -0,746542283 |
| GSE40272 | X14879 | 80256 KIAA1539   | -0,746424947 |
| GSE40272 | X2211  | 90627 STARD13    | -0,746138478 |
| GSE40272 | X453   | 140460 ASB7      | -0,746095666 |
| GSE40272 | X22816 | 5430 POLR2A      | -0,745723044 |
| GSE40272 | X25317 | 112950 MED8      | -0,745588795 |
| GSE40272 | X829   | 37 ACADVL        | -0,745500529 |
| GSE40272 | X30435 | 2778 GNAS        | -0,745292283 |
| GSE40272 | X20727 | 30832 ZNF354C    | -0,745291226 |
| GSE40272 | X11407 | 84501 SPIRE2     | -0,745235201 |
| GSE40272 | X12552 | 66004 LYNX1      | -0,745034355 |
| GSE40272 | X24637 | 142678 MIB2      | -0,744929175 |
| GSE40272 | X8994  | 439952 LOC439952 | -0,744774841 |
| GSE40272 | X13730 | 9479 MAPK8IP1    | -0,744352008 |
| GSE40272 | X6232  | 1855 DVL1        | -0,744311311 |
| GSE40272 | X22050 | 23299 BICD2      | -0,744271142 |
| GSE40272 | X30762 | 10726 NUDC       | -0,744238901 |
| GSE40272 | X40168 | 9203 ZMYM3       | -0,74414852  |
| GSE40272 | X38465 | 126382 NR2C2AP   | -0,743908562 |
| GSE40272 | X9759  | 11052 CPSF6      | -0,743609937 |
| GSE40272 | X31434 | 4166 CHST6       | -0,743493658 |
| GSE40272 | X4675  | 79934 ADCK4      | -0,743410148 |
| GSE40272 | X507   | 152992 METTL19   | -0,743078753 |
| GSE40272 | X6395  | 79036 C19orf50   | -0,742818182 |
| GSE40272 | X10128 | 5097 PCDH1       | -0,742704545 |
| GSE40272 | X26525 | 1938 EEF2        | -0,742660677 |
| GSE40272 | X15663 | 9022 CLIC3       | -0,742367865 |
| GSE40272 | X34233 | 9463 PICK1       | -0,74197463  |
| GSE40272 | X35273 | 118472 ZNF511    | -0,740540698 |
| GSE40272 | X34796 | 26470 SEZ6L2     | -0,740471987 |
| GSE40272 | X37967 | 875 CBS          | -0,740210888 |
| GSE40272 | X16768 | 23001 WDFY3      | -0,73993129  |
| GSE40272 | X42576 | 79050 NOC4L      | -0,739912791 |
| GSE40272 | X9946  | 388554 LOC388554 | -0,739868922 |
| GSE40272 | X24898 | 127262 TPRG1L    | -0,739696617 |
| GSE40272 | X39854 | 10867 TSPAN9     | -0,739658562 |
| GSE40272 | X31824 | 23095 KIF1B      | -0,739564482 |
| GSE40272 | X1276  | 205 AK4          | -0,73929704  |
| GSE40272 | X37968 | 9989 PPP4R1      | -0,739110465 |
| GSE40272 | X27067 | 775 CACNA1C      | -0,738872093 |
| GSE40272 | X42334 | 441626 LOC441626 | -0,738812368 |
| GSE40272 | X4299  | 4108 MAGEA9      | -0,738573996 |
| GSE40272 | X6398  | 55031 USP47      | -0,738408562 |
| GSE40272 | X17957 | 4145 MATK        | -0,737885307 |
| GSE40272 | X28469 | 23001 WDFY3      | -0,737450317 |
| GSE40272 | X8278  | 94030 LRRC4B     | -0,73731871  |
| GSE40272 | X23860 | 286887 KRT6C     | -0,73705074  |
| GSE40272 | X44151 | 11078 TRIOBP     | -0,73665222  |
| GSE40272 | X8235  | 9289 GPR56       | -0,736066068 |
| GSE40272 | X2374  | 10858 CYP46A1    | -0,736037526 |
| GSE40272 | X25406 | 9074 CLDN6       | -0,7357463   |

# Supplementary\_table\_S3

|          |        |                  |              |
|----------|--------|------------------|--------------|
| GSE40272 | X22503 | 26995 TRUB2      | -0,73552537  |
| GSE40272 | X38747 | 6322 SCML1       | -0,73519556  |
| GSE40272 | X9523  | 57153 SLC44A2    | -0,734955074 |
| GSE40272 | X28683 | 54993 ZSCAN2     | -0,734904863 |
| GSE40272 | X3588  | 1455 CSNK1G2     | -0,734786998 |
| GSE40272 | X9616  | 9322 TRIP10      | -0,734553911 |
| GSE40272 | X758   | 79165 LENG1      | -0,734104123 |
| GSE40272 | X25156 | 80243 PREX2      | -0,734063953 |
| GSE40272 | X9788  | 56654 NPDC1      | -0,733864693 |
| GSE40272 | X34587 | 27348 TOR1B      | -0,733593552 |
| GSE40272 | X15947 | 2068 ERCC2       | -0,733479387 |
| GSE40272 | X41393 | 118 ADD1         | -0,733326638 |
| GSE40272 | X13814 | 1459 CSNK2A2     | -0,732551268 |
| GSE40272 | X29772 | 54890 ALKBH5     | -0,732533298 |
| GSE40272 | X1566  | 2874 GPS2        | -0,732395349 |
| GSE40272 | X11529 | 7094 TLN1        | -0,732362579 |
| GSE40272 | X34055 | 401367 LOC401367 | -0,732305497 |
| GSE40272 | X16170 | 4035 LRP1        | -0,732302326 |
| GSE40272 | X27182 | 9054 NFS1        | -0,732052854 |
| GSE40272 | X8463  | 2275 FHL3        | -0,73177167  |
| GSE40272 | X367   | 388966 LOC388966 | -0,731325581 |
| GSE40272 | X31812 | 114799 ESCO1     | -0,730363636 |
| GSE40272 | X29404 | 54498 SMOX       | -0,729804968 |
| GSE40272 | X44388 | 51005 AMDHD2     | -0,72892759  |
| GSE40272 | X9108  | 337975 KRTAP20-1 | -0,728844609 |
| GSE40272 | X39483 | 4880 NPPC        | -0,728801268 |
| GSE40272 | X13009 | 4249 MGAT5       | -0,728692389 |
| GSE40272 | X33480 | 5097 PCDH1       | -0,728596195 |
| GSE40272 | X17056 | 57801 HES4       | -0,728587209 |
| GSE40272 | X9179  | 26099 C1orf144   | -0,727838795 |
| GSE40272 | X33920 | 55670 PEX26      | -0,727660148 |
| GSE40272 | X34440 | 23779 ARHGAP8    | -0,727400634 |
| GSE40272 | X19365 | 55627 SMPD4      | -0,727301268 |
| GSE40272 | X22628 | 2618 GART        | -0,727027484 |
| GSE40272 | X28917 | 7278 TUBA3C      | -0,726636892 |
| GSE40272 | X16651 | 5575 PRKAR1B     | -0,7264963   |
| GSE40272 | X1252  | 84820 POLR2J4    | -0,726363108 |
| GSE40272 | X34411 | 374655 ZNF710    | -0,725689746 |
| GSE40272 | X1155  | 23095 KIF1B      | -0,724960888 |
| GSE40272 | X25091 | 80761 UPK3B      | -0,72465222  |
| GSE40272 | X36070 | 388275 HNRNPA1P7 | -0,724052326 |
| GSE40272 | X15004 | 284613 CYB561D1  | -0,72337685  |
| GSE40272 | X33575 | 3268 AGFG2       | -0,723364165 |
| GSE40272 | X34887 | 5300 PIN1        | -0,722934461 |
| GSE40272 | X34589 | 65083 NOL6       | -0,722872093 |
| GSE40272 | X40752 | 153090 DAB2IP    | -0,722866279 |
| GSE40272 | X25449 | 4035 LRP1        | -0,722786469 |
| GSE40272 | X10043 | 441316 LOC441316 | -0,722661205 |
| GSE40272 | X42951 | 57404 CYP20A1    | -0,722659091 |
| GSE40272 | X10628 | 23361 ZNF629     | -0,722328753 |
| GSE40272 | X15140 | 351 APP          | -0,722188161 |
| GSE40272 | X19020 | 51295 ECSIT      | -0,722107294 |
| GSE40272 | X21471 | 7678 ZNF124      | -0,721578753 |

# Supplementary\_table\_S3

|          |        |                  |              |
|----------|--------|------------------|--------------|
| GSE40272 | X19658 | 442197 OR2I1P    | -0,721408562 |
| GSE40272 | X23555 | 7412 VCAM1       | -0,720993129 |
| GSE40272 | X14268 | 401642 LOC401642 | -0,720252114 |
| GSE40272 | X23013 | 2912 GRM2        | -0,719942389 |
| GSE40272 | X27995 | 54936 ADPRHL2    | -0,719900634 |
| GSE40272 | X37468 | 3340 NDST1       | -0,719844609 |
| GSE40272 | X5936  | 388847 LOC388847 | -0,719807611 |
| GSE40272 | X15242 | 4035 LRP1        | -0,719298626 |
| GSE40272 | X15162 | 30837 SOCS7      | -0,719162262 |
| GSE40272 | X23220 | 9679 FAM53B      | -0,719160677 |
| GSE40272 | X38305 | 387882 C12orf75  | -0,719062368 |
| GSE40272 | X6340  | 203228 C9orf72   | -0,718665433 |
| GSE40272 | X2115  | 64418 TMEM168    | -0,718451374 |
| GSE40272 | X8494  | 55702 CCDC94     | -0,718313425 |
| GSE40272 | X37760 | 5339 PLEC        | -0,718301797 |
| GSE40272 | X13219 | 25 ABL1          | -0,718238372 |
| GSE40272 | X161   | 55120 FANCL      | -0,717920719 |
| GSE40272 | X4676  | 114038 LINC00313 | -0,717885835 |
| GSE40272 | X20959 | 2934 GSN         | -0,71767019  |
| GSE40272 | X8168  | 3886 KRT35       | -0,717411734 |
| GSE40272 | X5822  | 55898 UNC45A     | -0,716939746 |
| GSE40272 | X3955  | 89927 C16orf45   | -0,716689746 |
| GSE40272 | X26673 | 7410 VAV2        | -0,71646723  |
| GSE40272 | X1074  | 29924 EPN1       | -0,716373679 |
| GSE40272 | X36736 | 4035 LRP1        | -0,715640063 |
| GSE40272 | X11235 | 55756 INTS9      | -0,715548626 |
| GSE40272 | X3581  | 5530 PPP3CA      | -0,71534408  |
| GSE40272 | X17788 | 4037 LRP3        | -0,715051797 |
| GSE40272 | X30723 | 221178 SPATA13   | -0,71487315  |
| GSE40272 | X3561  | 2779 GNAT1       | -0,714858879 |
| GSE40272 | X4742  | 23181 DIP2A      | -0,714735729 |
| GSE40272 | X2933  | 55352 C17orf79   | -0,714517442 |
| GSE40272 | X36086 | 64866 CDCP1      | -0,714372622 |
| GSE40272 | X22414 | 126208 ZNF787    | -0,713960888 |
| GSE40272 | X35048 | 83696 TRAPPC9    | -0,71384778  |
| GSE40272 | X11703 | 192683 SCAMP5    | -0,713408034 |
| GSE40272 | X42063 | 149175 MANEAL    | -0,713186047 |
| GSE40272 | X8517  | 63941 NECAB3     | -0,712997357 |
| GSE40272 | X28126 | 84892 C3orf39    | -0,712957717 |
| GSE40272 | X11996 | 51333 ZNF771     | -0,712924419 |
| GSE40272 | X22784 | 53349 ZFYVE1     | -0,712802854 |
| GSE40272 | X7596  | 286260 LOC286260 | -0,71246723  |
| GSE40272 | X33667 | 22876 INPP5F     | -0,712365222 |
| GSE40272 | X1415  | 613 BCR          | -0,712088795 |
| GSE40272 | X32375 | 10432 RBM14      | -0,711208245 |
| GSE40272 | X1640  | 7411 VBP1        | -0,71070296  |
| GSE40272 | X40004 | 7551 ZNF3        | -0,710235201 |
| GSE40272 | X25592 | 10826 C5orf4     | -0,710023256 |
| GSE40272 | X24748 | 2781 GNAZ        | -0,709984672 |
| GSE40272 | X277   | 64864 RFX7       | -0,709779598 |
| GSE40272 | X14560 | 84255 SLC37A3    | -0,709639006 |
| GSE40272 | X30867 | 7975 MAFK        | -0,709635835 |
| GSE40272 | X1085  | 126321 C19orf28  | -0,709460359 |

# Supplementary\_table\_S3

|          |        |                  |              |
|----------|--------|------------------|--------------|
| GSE40272 | X23586 | 23235 SIK2       | -0,708503171 |
| GSE40272 | X37973 | 8636 SSNA1       | -0,708380021 |
| GSE40272 | X32745 | 10994 ILVBL      | -0,708297569 |
| GSE40272 | X5733  | 8662 EIF3B       | -0,708229387 |
| GSE40272 | X27537 | 1185 CLCN6       | -0,708216173 |
| GSE40272 | X5646  | 91445 RNF185     | -0,708100423 |
| GSE40272 | X34051 | 29781 NCAPH2     | -0,707940275 |
| GSE40272 | X15876 | 9627 SNCAIP      | -0,707713002 |
| GSE40272 | X31821 | 23095 KIF1B      | -0,707091966 |
| GSE40272 | X23069 | 23095 KIF1B      | -0,706477801 |
| GSE40272 | X6890  | 4035 LRP1        | -0,706413848 |
| GSE40272 | X43384 | 10025 MED16      | -0,706054968 |
| GSE40272 | X24670 | 4035 LRP1        | -0,705688689 |
| GSE40272 | X43509 | 5822 PWP2        | -0,705645349 |
| GSE40272 | X44441 | 54732 TMED9      | -0,705335624 |
| GSE40272 | X27272 | 5663 PSEN1       | -0,705201374 |
| GSE40272 | X41526 | 4627 MYH9        | -0,704781712 |
| GSE40272 | X21106 | 388623 LOC388623 | -0,704653805 |
| GSE40272 | X14082 | 23096 IQSEC2     | -0,704636364 |
| GSE40272 | X23731 | 22903 BTBD3      | -0,704450317 |
| GSE40272 | X21045 | 23001 WDFY3      | -0,704180233 |
| GSE40272 | X35192 | 389695 LOC389695 | -0,704028541 |
| GSE40272 | X31567 | 254359 ZDHHC24   | -0,703954545 |
| GSE40272 | X9742  | 51280 GOLM1      | -0,703928118 |
| GSE40272 | X31381 | 4059 BCAM        | -0,703875264 |
| GSE40272 | X1754  | 63941 NECAB3     | -0,703748414 |
| GSE40272 | X11273 | 156 ADRBK1       | -0,703705074 |
| GSE40272 | X27875 | 442328 LOC442328 | -0,703562368 |
| GSE40272 | X13450 | 4752 NEK3        | -0,70339482  |
| GSE40272 | X12201 | 56109 PCDHGA6    | -0,702381607 |
| GSE40272 | X18159 | 80700 UBXN6      | -0,702332452 |
| GSE40272 | X27454 | 7094 TLN1        | -0,701942389 |
| GSE40272 | X38869 | 955 ENTPD6       | -0,701633721 |
| GSE40272 | X7748  | 133584 EGFLAM    | -0,701285412 |
| GSE40272 | X40870 | 64718 UNKL       | -0,701179175 |
| GSE40272 | X35913 | 208 AKT2         | -0,701099894 |
| GSE40272 | X30527 | 27165 GLS2       | -0,700868922 |
| GSE40272 | X15014 | 5433 POLR2D      | -0,700756871 |
| GSE40272 | X19635 | 6542 SLC7A2      | -0,700371564 |
| GSE40272 | X4248  | 1073 CFL2        | -0,699974101 |
| GSE40272 | X23932 | 79025 C20orf195  | -0,699726744 |
| GSE40272 | X3479  | 5106 PCK2        | -0,699696089 |
| GSE40272 | X36602 | 389856 USP27X    | -0,699662791 |
| GSE40272 | X32646 | 7067 THRA        | -0,699647992 |
| GSE40272 | X38382 | 442646 LOC442646 | -0,699547569 |
| GSE40272 | X41376 | 7094 TLN1        | -0,699433404 |
| GSE40272 | X5060  | 3249 HPN         | -0,699402748 |
| GSE40272 | X9444  | 30819 KCNIP2     | -0,69907611  |
| GSE40272 | X8613  | 23001 WDFY3      | -0,698988901 |
| GSE40272 | X7271  | 22888 UBOX5      | -0,698894292 |
| GSE40272 | X3294  | 79014 C16orf67   | -0,698893235 |
| GSE40272 | X27011 | 89781 HPS4       | -0,698726744 |
| GSE40272 | X3862  | 1020 CDK5        | -0,698659619 |



# Supplementary\_table\_S3

|          |        |                  |              |
|----------|--------|------------------|--------------|
| GSE40272 | X14167 | 4130 MAP1A       | -0,69865222  |
| GSE40272 | X8508  | 9392 TGFBRAP1    | -0,698211945 |
| GSE40272 | X22911 | 10524 KAT5       | -0,698163319 |
| GSE40272 | X25614 | 23598 PATZ1      | -0,697621036 |
| GSE40272 | X38385 | 29068 ZBTB44     | -0,697389535 |
| GSE40272 | X13122 | 23168 RTF1       | -0,697221987 |
| GSE40272 | X19188 | 5499 PPP1CA      | -0,697206131 |
| GSE40272 | X26619 | 5372 PMM1        | -0,697204545 |
| GSE40272 | X2221  | 56970 ATXN7L3    | -0,697141121 |
| GSE40272 | X30933 | 7572 ZNF24       | -0,696715116 |
| GSE40272 | X16603 | 8420 SNHG3       | -0,696462474 |
| GSE40272 | X17448 | 84219 WDR24      | -0,696358351 |
| GSE40272 | X10109 | 1982 EIF4G2      | -0,696273784 |
| GSE40272 | X18257 | 56999 ADAMTS9    | -0,696129493 |
| GSE40272 | X2314  | 55902 ACSS2      | -0,696069767 |
| GSE40272 | X9952  | 221078 NSUN6     | -0,695905391 |
| GSE40272 | X29712 | 4298 MLLT1       | -0,695420719 |
| GSE40272 | X6210  | 10726 NUDC       | -0,695264271 |
| GSE40272 | X6664  | 27231 ITGB1BP3   | -0,695153805 |
| GSE40272 | X13968 | 55743 CHFR       | -0,695113636 |
| GSE40272 | X13701 | 1855 DVL1        | -0,69496723  |
| GSE40272 | X16573 | 23001 WDFY3      | -0,694942918 |
| GSE40272 | X26864 | 64748 LPPR2      | -0,694783827 |
| GSE40272 | X1030  | 5376 PMP22       | -0,694187104 |
| GSE40272 | X34869 | 5253 PHF2        | -0,693972516 |
| GSE40272 | X4257  | 400470 LOC400470 | -0,693961416 |
| GSE40272 | X17526 | 1459 CSNK2A2     | -0,693306554 |
| GSE40272 | X10084 | 9657 IQCB1       | -0,693240486 |
| GSE40272 | X16233 | 5252 PHF1        | -0,693102537 |
| GSE40272 | X17799 | 11168 PSIP1      | -0,692263742 |
| GSE40272 | X2632  | 64837 KLC2       | -0,692169662 |
| GSE40272 | X42163 | 10734 STAG3      | -0,692160148 |
| GSE40272 | X40984 | 138429 PIP5KL1   | -0,692022727 |
| GSE40272 | X39618 | 163 AP2B1        | -0,691913319 |
| GSE40272 | X6546  | 54715 RBFOX1     | -0,691417019 |
| GSE40272 | X34048 | 10994 ILVBL      | -0,691385835 |
| GSE40272 | X26945 | 83986 ITFG3      | -0,691011628 |
| GSE40272 | X34978 | 5331 PLCB3       | -0,690915962 |
| GSE40272 | X26012 | 442248 LOC442248 | -0,690730444 |
| GSE40272 | X23084 | 150379 PNPLA5    | -0,690709302 |
| GSE40272 | X22732 | 54929 TMEM161A   | -0,690458774 |
| GSE40272 | X19827 | 56061 UBFD1      | -0,690129493 |
| GSE40272 | X1440  | 10163 WASF2      | -0,690042812 |
| GSE40272 | X17037 | 255022 CALHM1    | -0,6900074   |
| GSE40272 | X9112  | 8178 ELL         | -0,689631607 |
| GSE40272 | X33732 | 10809 STARD10    | -0,688901163 |
| GSE40272 | X5736  | 56853 CELF4      | -0,688786998 |
| GSE40272 | X33097 | 8994 LIMD1       | -0,688645877 |
| GSE40272 | X22984 | 949 SCARB1       | -0,688405391 |
| GSE40272 | X33442 | 5802 PTPRS       | -0,688403805 |
| GSE40272 | X43221 | 2011 MARK2       | -0,688152748 |
| GSE40272 | X31383 | 6720 SREBF1      | -0,68808351  |
| GSE40272 | X38640 | 441280 LOC441280 | -0,687744186 |

# Supplementary\_table\_S3

|          |        |                  |              |
|----------|--------|------------------|--------------|
| GSE40272 | X12701 | 6525 SMTN        | -0,687390592 |
| GSE40272 | X7992  | 23193 GANAB      | -0,687106765 |
| GSE40272 | X34590 | 288 ANK3         | -0,686504757 |
| GSE40272 | X23355 | 7542 ZFPL1       | -0,686426533 |
| GSE40272 | X7208  | 5306 PITPNA      | -0,686299154 |
| GSE40272 | X23339 | 2801 GOLGA2      | -0,686190803 |
| GSE40272 | X14861 | 11274 USP18      | -0,685947146 |
| GSE40272 | X8605  | 64342 HS1BP3     | -0,68563055  |
| GSE40272 | X35493 | 6625 SNRNP70     | -0,685356765 |
| GSE40272 | X35423 | 7293 TNFRSF4     | -0,685084567 |
| GSE40272 | X3245  | 54108 CHRAC1     | -0,685074524 |
| GSE40272 | X18176 | 4035 LRP1        | -0,684889535 |
| GSE40272 | X8377  | 439976 LOC439976 | -0,68470296  |
| GSE40272 | X42092 | 91828 EXOC3L4    | -0,684580867 |
| GSE40272 | X1556  | 55333 SYNJ2BP    | -0,684571353 |
| GSE40272 | X6074  | 157922 CAMSAP1   | -0,684561839 |
| GSE40272 | X8292  | 11160 ERLIN2     | -0,684318182 |
| GSE40272 | X16068 | 351 APP          | -0,684276427 |
| GSE40272 | X11384 | 8314 BAP1        | -0,684201374 |
| GSE40272 | X17227 | 59 ACTA2         | -0,683940803 |
| GSE40272 | X1028  | 10521 DDX17      | -0,683733087 |
| GSE40272 | X9908  | 5297 PI4KA       | -0,683663319 |
| GSE40272 | X40881 | 1364 CLDN4       | -0,683539641 |
| GSE40272 | X40823 | 4899 NRF1        | -0,683315539 |
| GSE40272 | X30980 | 25844 YIPF3      | -0,68313055  |
| GSE40272 | X26063 | 64423 INF2       | -0,682266913 |
| GSE40272 | X31245 | 54108 CHRAC1     | -0,682188161 |
| GSE40272 | X40645 | 51282 SCAND1     | -0,68161945  |
| GSE40272 | X37351 | 5905 RANGAP1     | -0,681426004 |
| GSE40272 | X23634 | 114757 CYGB      | -0,681363108 |
| GSE40272 | X24829 | 1459 CSNK2A2     | -0,681357294 |
| GSE40272 | X11009 | 25953 PNKD       | -0,681245243 |
| GSE40272 | X41250 | 2194 FASN        | -0,680661205 |
| GSE40272 | X5559  | 57186 RALGAPA2   | -0,680067125 |
| GSE40272 | X40541 | 9509 ADAMTS2     | -0,679854123 |
| GSE40272 | X41909 | 128 ADH5         | -0,679599894 |
| GSE40272 | X12353 | 4952 OCRL        | -0,679538055 |
| GSE40272 | X40727 | 23095 KIF1B      | -0,679310782 |
| GSE40272 | X37381 | 1031 CDKN2C      | -0,679040169 |
| GSE40272 | X39376 | 4952 OCRL        | -0,67894926  |
| GSE40272 | X27602 | 55909 BIN3       | -0,678442918 |
| GSE40272 | X31748 | 6714 SRC         | -0,678092495 |
| GSE40272 | X23729 | 84152 PPP1R1B    | -0,677869979 |
| GSE40272 | X17764 | 400675 LOC400675 | -0,677858879 |
| GSE40272 | X163   | 3761 KCNJ4       | -0,677233087 |
| GSE40272 | X12759 | 10608 MXD4       | -0,677179704 |
| GSE40272 | X24051 | 1613 DAPK3       | -0,677153277 |
| GSE40272 | X14986 | 389322 HNRNPKP1  | -0,676970402 |
| GSE40272 | X12229 | 5791 PTPRE       | -0,67687685  |
| GSE40272 | X12705 | 23373 CRTC1      | -0,676824524 |
| GSE40272 | X35842 | 23001 WDFY3      | -0,676653805 |
| GSE40272 | X30240 | 7094 TLN1        | -0,676146406 |
| GSE40272 | X4246  | 23218 NBEAL2     | -0,675995772 |

# Supplementary\_table\_S3

|          |        |                  |              |
|----------|--------|------------------|--------------|
| GSE40272 | X7589  | 8668 EIF3I       | -0,67567019  |
| GSE40272 | X24141 | 80319 CXXC4      | -0,675664376 |
| GSE40272 | X17380 | 167359 NIM1      | -0,675534355 |
| GSE40272 | X5343  | 4734 NEDD4       | -0,675160148 |
| GSE40272 | X10096 | 84629 TNRC18     | -0,675082981 |
| GSE40272 | X26545 | 112936 VPS26B    | -0,674908034 |
| GSE40272 | X7678  | 3609 ILF3        | -0,674874207 |
| GSE40272 | X42456 | 22955 SCMH1      | -0,674737844 |
| GSE40272 | X4070  | 55823 VPS11      | -0,674704545 |
| GSE40272 | X42855 | 9846 GAB2        | -0,674642706 |
| GSE40272 | X37478 | 26001 RNF167     | -0,67459778  |
| GSE40272 | X27189 | 57474 ZNF490     | -0,674399577 |
| GSE40272 | X29312 | 4035 LRP1        | -0,674354651 |
| GSE40272 | X38872 | 80144 FRAS1      | -0,674174947 |
| GSE40272 | X38058 | 22933 SIRT2      | -0,674090909 |
| GSE40272 | X132   | 57706 DENND1A    | -0,674078753 |
| GSE40272 | X8411  | 8848 TSC22D1     | -0,673654863 |
| GSE40272 | X12307 | 79147 FKRP       | -0,673523256 |
| GSE40272 | X22572 | 441485 LOC441485 | -0,673306025 |
| GSE40272 | X21932 | 51286 CEND1      | -0,672327167 |
| GSE40272 | X17924 | 351 APP          | -0,672197146 |
| GSE40272 | X36092 | 22827 PUF60      | -0,672087209 |
| GSE40272 | X28449 | 5396 PRRX1       | -0,67177537  |
| GSE40272 | X44160 | 4035 LRP1        | -0,67170296  |
| GSE40272 | X19180 | 3782 KCNN3       | -0,6709963   |
| GSE40272 | X35594 | 286128 ZFP41     | -0,670784884 |
| GSE40272 | X36020 | 1849 DUSP7       | -0,670751586 |
| GSE40272 | X41467 | 29781 NCAPH2     | -0,670481501 |
| GSE40272 | X13694 | 64866 CDCP1      | -0,670158562 |
| GSE40272 | X20046 | 342371 ATXN1L    | -0,670099366 |
| GSE40272 | X18852 | 351 APP          | -0,670085095 |
| GSE40272 | X37622 | 2874 GPS2        | -0,670051797 |
| GSE40272 | X14874 | 54751 FBLIM1     | -0,669957717 |
| GSE40272 | X20917 | 23001 WDFY3      | -0,66983351  |
| GSE40272 | X38693 | 84108 PCGF6      | -0,669727273 |
| GSE40272 | X12102 | 10523 CHERP      | -0,669598837 |
| GSE40272 | X20761 | 7310 ZRSR1       | -0,669327167 |
| GSE40272 | X41191 | 404744 AAA1      | -0,669313953 |
| GSE40272 | X32254 | 84942 WDR73      | -0,669113108 |
| GSE40272 | X5864  | 3850 KRT3        | -0,668942389 |
| GSE40272 | X3876  | 1312 COMT        | -0,668874207 |
| GSE40272 | X29397 | 8720 MBTPS1      | -0,66879704  |
| GSE40272 | X22305 | 376412 RNF126P1  | -0,66852907  |
| GSE40272 | X11907 | 5573 PRKAR1A     | -0,668436575 |
| GSE40272 | X11638 | 27315 PGAP2      | -0,668207188 |
| GSE40272 | X24899 | 55898 UNC45A     | -0,667716173 |
| GSE40272 | X17772 | 53635 PTOV1      | -0,667643235 |
| GSE40272 | X40999 | 9604 RNF14       | -0,667335624 |
| GSE40272 | X24197 | 84519 ACRBP      | -0,667231501 |
| GSE40272 | X16439 | 81926 FAM108A1   | -0,667184989 |
| GSE40272 | X32350 | 10777 ARPP21     | -0,666714059 |
| GSE40272 | X32380 | 29967 LRP12      | -0,6664963   |
| GSE40272 | X28366 | 388407 C17orf82  | -0,666495243 |

# Supplementary\_table\_S3

|          |        |                  |              |
|----------|--------|------------------|--------------|
| GSE40272 | X4106  | 4035 LRP1        | -0,666336152 |
| GSE40272 | X28569 | 343531 C1orf224  | -0,666304968 |
| GSE40272 | X1743  | 4041 LRP5        | -0,665383192 |
| GSE40272 | X6652  | 3985 LIMK2       | -0,665154863 |
| GSE40272 | X3434  | 5202 PFDN2       | -0,664931818 |
| GSE40272 | X29334 | 389473 LOC389473 | -0,664884778 |
| GSE40272 | X7587  | 4237 MFAP2       | -0,664771142 |
| GSE40272 | X21576 | 5792 PTPRF       | -0,664612051 |
| GSE40272 | X35765 | 7837 PXDN        | -0,664415433 |
| GSE40272 | X42051 | 4952 OCRL        | -0,664307082 |
| GSE40272 | X31143 | 610 HCN2         | -0,664057611 |
| GSE40272 | X3526  | 55009 C19orf24   | -0,663955074 |
| GSE40272 | X12867 | 10072 DPP3       | -0,663751586 |
| GSE40272 | X15305 | 9448 MAP4K4      | -0,66357981  |
| GSE40272 | X38592 | 4035 LRP1        | -0,663463002 |
| GSE40272 | X22371 | 26994 RNF11      | -0,663299683 |
| GSE40272 | X32264 | 65265 C8orf33    | -0,663264799 |
| GSE40272 | X721   | 84335 AKT1S1     | -0,663264271 |
| GSE40272 | X22218 | 1174 AP1S1       | -0,663089852 |
| GSE40272 | X359   | 54815 GATAD2A    | -0,663073996 |
| GSE40272 | X36725 | 5339 PLEC        | -0,662643235 |
| GSE40272 | X7591  | 816 CAMK2B       | -0,662570296 |
| GSE40272 | X7818  | 4035 LRP1        | -0,66238055  |
| GSE40272 | X631   | 23224 SYNE2      | -0,6622426   |
| GSE40272 | X41407 | 8704 B4GALT2     | -0,662146934 |
| GSE40272 | X27208 | 5763 PTMS        | -0,662056025 |
| GSE40272 | X14678 | 11021 RAB35      | -0,661942918 |
| GSE40272 | X23356 | 9961 MVP         | -0,661695032 |
| GSE40272 | X7659  | 1,00E+04 AKT3    | -0,661588795 |
| GSE40272 | X17284 | 23499 MACF1      | -0,661288584 |
| GSE40272 | X26085 | 8864 PER2        | -0,661256342 |
| GSE40272 | X9824  | 4035 LRP1        | -0,661202431 |
| GSE40272 | X24924 | 140460 ASB7      | -0,66116649  |
| GSE40272 | X30973 | 84271 POLDIP3    | -0,660960359 |
| GSE40272 | X10088 | 9144 SYNGR2      | -0,660884778 |
| GSE40272 | X38581 | 2022 ENG         | -0,660656977 |
| GSE40272 | X25093 | 9535 GMFG        | -0,660417548 |
| GSE40272 | X43330 | 1981 EIF4G1      | -0,660361522 |
| GSE40272 | X7299  | 79794 C12orf49   | -0,659993658 |
| GSE40272 | X34967 | 7436 VLDLR       | -0,659803383 |
| GSE40272 | X965   | 79080 CCDC86     | -0,659267442 |
| GSE40272 | X25222 | 7275 TUB         | -0,659236258 |
| GSE40272 | X29124 | 23498 HAAO       | -0,658975159 |
| GSE40272 | X4577  | 55349 CHDH       | -0,658751586 |
| GSE40272 | X22736 | 58513 EPS15L1    | -0,658561839 |
| GSE40272 | X38372 | 9260 PDLIM7      | -0,658332452 |
| GSE40272 | X7327  | 84572 GNPTG      | -0,658328753 |
| GSE40272 | X38875 | 7389 UROD        | -0,658061839 |
| GSE40272 | X9696  | 25870 SUMF2      | -0,657838266 |
| GSE40272 | X22735 | 26100 WIPI2      | -0,657544926 |
| GSE40272 | X22465 | 4756 NEO1        | -0,657530127 |
| GSE40272 | X35507 | 6323 SCN1A       | -0,657077696 |
| GSE40272 | X28905 | 84875 PARP10     | -0,657073467 |

# Supplementary\_table\_S3

|          |        |                  |              |
|----------|--------|------------------|--------------|
| GSE40272 | X31722 | 6887 TAL2        | -0,656596195 |
| GSE40272 | X15424 | 9294 S1PR2       | -0,656553383 |
| GSE40272 | X22203 | 10093 ARPC4      | -0,65644186  |
| GSE40272 | X28111 | 9145 SYNGR1      | -0,656160148 |
| GSE40272 | X21850 | 7581 ZNF33A      | -0,656032241 |
| GSE40272 | X7881  | 23001 WDFY3      | -0,655827167 |
| GSE40272 | X15680 | 4440 MSI1        | -0,655654863 |
| GSE40272 | X26618 | 10755 GIPC1      | -0,655613636 |
| GSE40272 | X4256  | 4035 LRP1        | -0,655596195 |
| GSE40272 | X1156  | 6892 TAPBP       | -0,655449789 |
| GSE40272 | X40906 | 1435 CSF1        | -0,655412791 |
| GSE40272 | X29798 | 23476 BRD4       | -0,65502537  |
| GSE40272 | X29831 | 266675 BEST4     | -0,654948732 |
| GSE40272 | X5174  | 55806 HR         | -0,654533827 |
| GSE40272 | X38749 | 23001 WDFY3      | -0,654298626 |
| GSE40272 | X16122 | 10383 TUBB2C     | -0,65422463  |
| GSE40272 | X4926  | 91966 CXorf40A   | -0,654002114 |
| GSE40272 | X743   | 254863 C17orf61  | -0,653989958 |
| GSE40272 | X8547  | 71 ACTG1         | -0,65385518  |
| GSE40272 | X30471 | 57158 JPH2       | -0,653825053 |
| GSE40272 | X11300 | 7188 TRAF5       | -0,653750529 |
| GSE40272 | X5193  | 64145 ZFYVE20    | -0,653645877 |
| GSE40272 | X42534 | 56114 PCDHGA1    | -0,65358351  |
| GSE40272 | X41834 | 8717 TRADD       | -0,653301268 |
| GSE40272 | X15925 | 92285 ZNF585B    | -0,652518499 |
| GSE40272 | X12528 | 10400 PEMT       | -0,651463002 |
| GSE40272 | X32748 | 23095 KIF1B      | -0,651268499 |
| GSE40272 | X21996 | 256364 EML3      | -0,651255285 |
| GSE40272 | X4296  | 23001 WDFY3      | -0,650864165 |
| GSE40272 | X37944 | 7511 XPNPEP1     | -0,65080814  |
| GSE40272 | X5220  | 8496 PPFBP1      | -0,650617336 |
| GSE40272 | X41689 | 81890 QTRT1      | -0,650470402 |
| GSE40272 | X16778 | 6926 TBX3        | -0,650419662 |
| GSE40272 | X16789 | 400726 LOC400726 | -0,65027167  |
| GSE40272 | X31346 | 8971 H1FX        | -0,649954545 |
| GSE40272 | X33237 | 91526 ANKRD44    | -0,649936047 |
| GSE40272 | X42268 | 1523 CUX1        | -0,649868393 |
| GSE40272 | X19023 | 93589 CACNA2D4   | -0,649840909 |
| GSE40272 | X41618 | 127540 HMGB4     | -0,649532241 |
| GSE40272 | X17403 | 55572 FOXRED1    | -0,649511628 |
| GSE40272 | X17784 | 6305 SBF1        | -0,649296512 |
| GSE40272 | X34177 | 5297 PI4KA       | -0,649062896 |
| GSE40272 | X24417 | 351 APP          | -0,649036469 |
| GSE40272 | X6102  | 51031 GLOD4      | -0,648569239 |
| GSE40272 | X41335 | 1175 AP2S1       | -0,648553911 |
| GSE40272 | X6089  | 10526 IPO8       | -0,648309197 |
| GSE40272 | X12388 | 55627 SMPD4      | -0,64797463  |
| GSE40272 | X1219  | 310 ANXA7        | -0,647342495 |
| GSE40272 | X18785 | 1398 CRK         | -0,64709778  |
| GSE40272 | X10756 | 400664 LOC400664 | -0,64705814  |
| GSE40272 | X34240 | 55846 ITFG2      | -0,646990486 |
| GSE40272 | X24701 | 3693 ITGB5       | -0,646926533 |
| GSE40272 | X168   | 816 CAMK2B       | -0,646722516 |

# Supplementary\_table\_S3

|          |        |                  |              |
|----------|--------|------------------|--------------|
| GSE40272 | X21156 | 64943 NT5DC2     | -0,646667548 |
| GSE40272 | X29034 | 23095 KIF1B      | -0,64639852  |
| GSE40272 | X1298  | 8861 LDB1        | -0,646280655 |
| GSE40272 | X44141 | 23383 MAU2       | -0,645997357 |
| GSE40272 | X19953 | 949 SCARB1       | -0,645994186 |
| GSE40272 | X37814 | 442174 LOC442174 | -0,645862579 |
| GSE40272 | X13018 | 389860 PAGE2B    | -0,645587209 |
| GSE40272 | X38457 | 440476 LOC440476 | -0,64557241  |
| GSE40272 | X28066 | 51308 REEP2      | -0,645395349 |
| GSE40272 | X31408 | 10106 CTDSP2     | -0,644961416 |
| GSE40272 | X18260 | 4204 MECP2       | -0,644895877 |
| GSE40272 | X4987  | 59338 PLEKHA1    | -0,644694503 |
| GSE40272 | X35093 | 4240 MFGE8       | -0,644615222 |
| GSE40272 | X9944  | 3297 HSF1        | -0,644302854 |
| GSE40272 | X36348 | 442503 LOC442503 | -0,64427537  |
| GSE40272 | X5034  | 4035 LRP1        | -0,64427167  |
| GSE40272 | X26482 | 89870 TRIM15     | -0,644184461 |
| GSE40272 | X9335  | 79705 LRRK1      | -0,644168605 |
| GSE40272 | X13534 | 1509 CTSD        | -0,644123679 |
| GSE40272 | X6213  | 2886 GRB7        | -0,644091966 |
| GSE40272 | X32258 | 29904 EEF2K      | -0,644014271 |
| GSE40272 | X12894 | 51226 COPZ2      | -0,643763214 |
| GSE40272 | X23893 | 23519 ANP32D     | -0,643201374 |
| GSE40272 | X22588 | 5576 PRKAR2A     | -0,642831395 |
| GSE40272 | X6426  | 4795 NFKBIL1     | -0,64278277  |
| GSE40272 | X6330  | 3972 LHB         | -0,642739958 |
| GSE40272 | X17871 | 3304 HSPA1B      | -0,642491015 |
| GSE40272 | X12249 | 9522 SCAMP1      | -0,642488372 |
| GSE40272 | X6661  | 9784 SNX17       | -0,642477273 |
| GSE40272 | X34872 | 2048 EPHB2       | -0,642349366 |
| GSE40272 | X16310 | 4794 NFKBIE      | -0,642229387 |
| GSE40272 | X9690  | 389710 LOC389710 | -0,642091966 |
| GSE40272 | X5449  | 1727 CYB5R3      | -0,641883721 |
| GSE40272 | X7656  | 6584 SLC22A5     | -0,641826638 |
| GSE40272 | X6324  | 124245 ZC3H18    | -0,641752643 |
| GSE40272 | X23744 | 4035 LRP1        | -0,641259514 |
| GSE40272 | X27225 | 26115 TANC2      | -0,641221987 |
| GSE40272 | X30915 | 4952 OCRL        | -0,641090381 |
| GSE40272 | X3508  | 2516 NR5A1       | -0,64104334  |
| GSE40272 | X19318 | 80776 B9D2       | -0,640837738 |
| GSE40272 | X6815  | 93953 ACRC       | -0,640776427 |
| GSE40272 | X35953 | 344165 LOC344165 | -0,640690275 |
| GSE40272 | X23730 | 29803 REPIN1     | -0,640439218 |
| GSE40272 | X4792  | 131185 LOC131185 | -0,640214059 |
| GSE40272 | X11185 | 114609 TIRAP     | -0,640182875 |
| GSE40272 | X5407  | 29801 ZDHHC8     | -0,640078753 |
| GSE40272 | X1454  | 50700 RDH8       | -0,639761099 |
| GSE40272 | X33463 | 1945 EFNA4       | -0,639744186 |
| GSE40272 | X9628  | 387644 LINC00202 | -0,639382664 |
| GSE40272 | X24269 | 8045 RASSF7      | -0,63848203  |
| GSE40272 | X24274 | 84224 NBPFF3     | -0,638479915 |
| GSE40272 | X1560  | 84164 ASCC2      | -0,63834778  |
| GSE40272 | X5483  | 55577 NAGK       | -0,63802167  |

# Supplementary\_table\_S3

|          |        |                     |              |
|----------|--------|---------------------|--------------|
| GSE40272 | X30288 | 2820 GPD2           | -0,637966702 |
| GSE40272 | X43081 | 4035 LRP1           | -0,637954017 |
| GSE40272 | X41221 | 6651 SON            | -0,63762685  |
| GSE40272 | X248   | 8085 MLL2           | -0,637352537 |
| GSE40272 | X33444 | 79683 ZDHHC14       | -0,637233087 |
| GSE40272 | X34410 | 84861 KLHL22        | -0,637204545 |
| GSE40272 | X28700 | 27153 ZNF777        | -0,63717389  |
| GSE40272 | X5431  | 6239 RREB1          | -0,637016385 |
| GSE40272 | X27986 | 84656 GLYR1         | -0,636239958 |
| GSE40272 | X9513  | 3081 HGD            | -0,636149577 |
| GSE40272 | X23425 | 2909 ARHGAP35       | -0,636027484 |
| GSE40272 | X23891 | 3732 CD82           | -0,636027484 |
| GSE40272 | X8621  | 84255 SLC37A3       | -0,635953488 |
| GSE40272 | X39862 | 80139 ZNF703        | -0,635660677 |
| GSE40272 | X27378 | 10134 BCAP31        | -0,635536469 |
| GSE40272 | X27440 | 284338 PRR19        | -0,634454545 |
| GSE40272 | X21813 | 388799 C20orf107    | -0,634390592 |
| GSE40272 | X16169 | 4035 LRP1           | -0,634343023 |
| GSE40272 | X27455 | 5430 POLR2A         | -0,634075053 |
| GSE40272 | X11425 | 4952 OCRL           | -0,633608879 |
| GSE40272 | X9790  | 29123 ANKRD11       | -0,633548626 |
| GSE40272 | X30877 | 5524 PPP2R4         | -0,633420719 |
| GSE40272 | X17922 | 5788 PTPRC          | -0,633330338 |
| GSE40272 | X35837 | 3762 KCNJ5          | -0,633261628 |
| GSE40272 | X8429  | 113178 SCAMP4       | -0,632910677 |
| GSE40272 | X1220  | 4952 OCRL           | -0,632354651 |
| GSE40272 | X37131 | 55547 HAB1          | -0,632354123 |
| GSE40272 | X2004  | 266655 LINC00094    | -0,632332452 |
| GSE40272 | X12314 | 5297 PI4KA          | -0,631613636 |
| GSE40272 | X4900  | 23001 WDFY3         | -0,630791755 |
| GSE40272 | X33602 | 5338 PLD2           | -0,630689218 |
| GSE40272 | X30270 | 54436 SH3TC1        | -0,630567653 |
| GSE40272 | X38851 | 84331 FAM195A       | -0,630413848 |
| GSE40272 | X5517  | 10963 STIP1         | -0,630384249 |
| GSE40272 | X40009 | 125144 C17orf76-AS1 | -0,630306025 |
| GSE40272 | X3076  | 4952 OCRL           | -0,630304968 |
| GSE40272 | X34724 | 4043 LRPAP1         | -0,630279598 |
| GSE40272 | X27707 | 5297 PI4KA          | -0,630127907 |
| GSE40272 | X20450 | 5087 PBX1           | -0,629862051 |
| GSE40272 | X27903 | 89910 UBE3B         | -0,629469345 |
| GSE40272 | X28543 | 79089 TMUB2         | -0,629437632 |
| GSE40272 | X33941 | 51160 VPS28         | -0,629259514 |
| GSE40272 | X10340 | 3936 LCP1           | -0,629110465 |
| GSE40272 | X25691 | 27 ABL2             | -0,628807611 |
| GSE40272 | X4806  | 6573 SLC19A1        | -0,628751586 |
| GSE40272 | X16996 | 351 APP             | -0,628604651 |
| GSE40272 | X43634 | 4046 LSP1           | -0,628360994 |
| GSE40272 | X17097 | 7094 TLN1           | -0,628339852 |
| GSE40272 | X36034 | 7799 PRDM2          | -0,628263214 |
| GSE40272 | X5382  | 1819 DRG2           | -0,627859937 |
| GSE40272 | X16046 | 1459 CSNK2A2        | -0,627803383 |
| GSE40272 | X29845 | 80149 ZC3H12A       | -0,627628964 |
| GSE40272 | X26332 | 285601 GPR150       | -0,627613636 |

# Supplementary\_table\_S3

|          |        |                   |              |
|----------|--------|-------------------|--------------|
| GSE40272 | X6343  | 10902 BRD8        | -0,627578753 |
| GSE40272 | X3856  | 391039 CFL1P2     | -0,627299683 |
| GSE40272 | X14503 | 1741 DLG3         | -0,62728277  |
| GSE40272 | X17518 | 7392 USF2         | -0,626867865 |
| GSE40272 | X12880 | 6238 RRBP1        | -0,626499471 |
| GSE40272 | X25699 | 3136 HLA-H        | -0,626396934 |
| GSE40272 | X12163 | 10494 STK25       | -0,626365222 |
| GSE40272 | X33967 | 5865 RAB3B        | -0,626290698 |
| GSE40272 | X17277 | 348825 TPRXL      | -0,626012156 |
| GSE40272 | X7524  | 7536 SF1          | -0,625942389 |
| GSE40272 | X22759 | 79068 FTO         | -0,62580814  |
| GSE40272 | X29828 | 63941 NECAB3      | -0,625723044 |
| GSE40272 | X18278 | 1325 CORT         | -0,625662791 |
| GSE40272 | X11717 | 55191 NADSYN1     | -0,624705603 |
| GSE40272 | X18849 | 351 APP           | -0,624537526 |
| GSE40272 | X32565 | 64592 CLONE795723 | -0,624384778 |
| GSE40272 | X15833 | 9375 TM9SF2       | -0,624375264 |
| GSE40272 | X44338 | 441686 LOC441686  | -0,623889535 |
| GSE40272 | X37756 | 6687 SPG7         | -0,623827696 |
| GSE40272 | X7798  | 54956 PARP16      | -0,62351797  |
| GSE40272 | X29945 | 5826 ABCD4        | -0,623252643 |
| GSE40272 | X6383  | 170961 ANKRD24    | -0,623164905 |
| GSE40272 | X31184 | 56957 OTUD7B      | -0,623100423 |
| GSE40272 | X34698 | 401330 LOC401330  | -0,622983615 |
| GSE40272 | X37767 | 401367 LOC401367  | -0,622530655 |
| GSE40272 | X4243  | 23187 PHLDB1      | -0,622450846 |
| GSE40272 | X16019 | 7922 SLC39A7      | -0,622322939 |
| GSE40272 | X38410 | 401330 LOC401330  | -0,621912262 |
| GSE40272 | X6394  | 114049 WBSCR22    | -0,62182611  |
| GSE40272 | X22797 | 56834 GPR137      | -0,621743658 |
| GSE40272 | X6272  | 10295 BCKDK       | -0,621739958 |
| GSE40272 | X14723 | 1488 CTBP2        | -0,621566068 |
| GSE40272 | X37273 | 23547 LILRA4      | -0,621495772 |
| GSE40272 | X23275 | 3487 IGFBP4       | -0,621388478 |
| GSE40272 | X4285  | 442123 LOC442123  | -0,620763214 |
| GSE40272 | X5401  | 6043 SNORA63      | -0,620717759 |
| GSE40272 | X27078 | 6468 FBXW4        | -0,619910148 |
| GSE40272 | X30679 | 9811 CTIF         | -0,619642706 |
| GSE40272 | X42533 | 435 ASL           | -0,619071882 |
| GSE40272 | X15800 | 51684 SUFU        | -0,61904704  |
| GSE40272 | X6150  | 7072 TIA1         | -0,618708774 |
| GSE40272 | X4628  | 196264 MPZL3      | -0,618665433 |
| GSE40272 | X23350 | 345375 LOC345375  | -0,618339323 |
| GSE40272 | X19618 | 283578 TMED8      | -0,61802167  |
| GSE40272 | X42010 | 1384 CRAT         | -0,617875264 |
| GSE40272 | X10750 | 2934 GSN          | -0,617736786 |
| GSE40272 | X7918  | 5611 DNAJC3       | -0,617372622 |
| GSE40272 | X10095 | 23030 KDM4B       | -0,617079281 |
| GSE40272 | X29029 | 23648 SSBP3       | -0,616909091 |
| GSE40272 | X13625 | 23476 BRD4        | -0,616877907 |
| GSE40272 | X5589  | 1656 DDX6         | -0,616090909 |
| GSE40272 | X7217  | 26502 NARF        | -0,61602907  |
| GSE40272 | X78    | 25855 BRMS1       | -0,616016385 |



# Supplementary\_table\_S3

|          |        |                  |              |
|----------|--------|------------------|--------------|
| GSE40272 | X30995 | 22827 PUF60      | -0,615763214 |
| GSE40272 | X15302 | 163859 C1orf55   | -0,615760042 |
| GSE40272 | X8067  | 23020 SNRNP200   | -0,615660677 |
| GSE40272 | X44073 | 2972 BRF1        | -0,615263214 |
| GSE40272 | X28667 | 581 BAX          | -0,614754228 |
| GSE40272 | X38147 | 8398 PLA2G6      | -0,614656448 |
| GSE40272 | X42272 | 2787 GNG5        | -0,614329281 |
| GSE40272 | X22523 | 56927 GPR108     | -0,614156977 |
| GSE40272 | X4239  | 2907 GRINA       | -0,614150106 |
| GSE40272 | X12917 | 63898 SH2D4A     | -0,614028541 |
| GSE40272 | X11301 | 9962 SLC23A2     | -0,613903805 |
| GSE40272 | X10671 | 5892 RAD51D      | -0,613837209 |
| GSE40272 | X11672 | 8751 ADAM15      | -0,613820296 |
| GSE40272 | X174   | 7402 UTRN        | -0,61372093  |
| GSE40272 | X10743 | 3985 LIMK2       | -0,61358351  |
| GSE40272 | X30711 | 196120 LOC196120 | -0,613501586 |
| GSE40272 | X3226  | 11149 BVES       | -0,613385835 |
| GSE40272 | X2664  | 58508 MLL3       | -0,613204545 |
| GSE40272 | X9789  | 114757 CYGB      | -0,613188161 |
| GSE40272 | X8182  | 80121 FLJ23022   | -0,612930233 |
| GSE40272 | X37181 | 64834 ELOVL1     | -0,612834567 |
| GSE40272 | X30507 | 10664 CTCF       | -0,612235729 |
| GSE40272 | X30119 | 117584 RFFL      | -0,611078224 |
| GSE40272 | X30399 | 1639 DCTN1       | -0,610960888 |
| GSE40272 | X43536 | 23396 PIP5K1C    | -0,610817653 |
| GSE40272 | X9529  | 3275 PRMT2       | -0,610763214 |
| GSE40272 | X6121  | 55558 PLXNA3     | -0,61069556  |
| GSE40272 | X19617 | 26108 PYGO1      | -0,610654334 |
| GSE40272 | X13362 | 81566 CSRN2P     | -0,61005444  |
| GSE40272 | X43782 | 29925 GMPPB      | -0,609880021 |
| GSE40272 | X9534  | 80196 RNF34      | -0,609835095 |
| GSE40272 | X18074 | 54869 EPS8L1     | -0,609498943 |
| GSE40272 | X11469 | 442646 LOC442646 | -0,609491543 |
| GSE40272 | X34049 | 84960 KIAA1984   | -0,609479915 |
| GSE40272 | X2158  | 55954 ZMAT5      | -0,609424947 |
| GSE40272 | X19642 | 125875 CLDND2    | -0,609276427 |
| GSE40272 | X32141 | 8106 PABPN1      | -0,60894186  |
| GSE40272 | X26567 | 80144 FRAS1      | -0,608732558 |
| GSE40272 | X2916  | 391723 HELT      | -0,608729915 |
| GSE40272 | X11671 | 576 BAI2         | -0,608686575 |
| GSE40272 | X36044 | 89887 ZNF628     | -0,608653277 |
| GSE40272 | X28091 | 4134 MAP4        | -0,608649577 |
| GSE40272 | X19777 | 351 APP          | -0,608465116 |
| GSE40272 | X23138 | 57862 ZNF410     | -0,608221987 |
| GSE40272 | X34862 | 55004 LAMTOR1    | -0,608078753 |
| GSE40272 | X27246 | 4323 MMP14       | -0,608034884 |
| GSE40272 | X33486 | 27 ABL2          | -0,608007928 |
| GSE40272 | X18863 | 221937 FOXK1     | -0,607913848 |
| GSE40272 | X544   | 5430 POLR2A      | -0,607865222 |
| GSE40272 | X5922  | 85007 AGXT2L2    | -0,607715645 |
| GSE40272 | X28551 | 581 BAX          | -0,607093023 |
| GSE40272 | X1672  | 126119 JOSD2     | -0,607028013 |
| GSE40272 | X42571 | 55291 PPP6R3     | -0,607006871 |

# Supplementary\_table\_S3

|          |        |                  |              |
|----------|--------|------------------|--------------|
| GSE40272 | X17098 | 4035 LRP1        | -0,60667759  |
| GSE40272 | X7794  | 9703 KIAA0100    | -0,60665222  |
| GSE40272 | X12199 | 219 ALDH1B1      | -0,606650106 |
| GSE40272 | X12413 | 6159 RPL29       | -0,606365751 |
| GSE40272 | X30238 | 1509 CTSD        | -0,606187104 |
| GSE40272 | X30885 | 10171 RCL1       | -0,606131607 |
| GSE40272 | X22896 | 9527 GOSR1       | -0,60577537  |
| GSE40272 | X20579 | 3185 HNRNPF      | -0,605602008 |
| GSE40272 | X31112 | 7090 TLE3        | -0,605510571 |
| GSE40272 | X13311 | 11237 RNF24      | -0,605458245 |
| GSE40272 | X20281 | 85363 TRIM5      | -0,605418605 |
| GSE40272 | X20679 | 23001 WDFY3      | -0,605390063 |
| GSE40272 | X6747  | 23095 KIF1B      | -0,605189218 |
| GSE40272 | X17053 | 22994 AZI1       | -0,604899577 |
| GSE40272 | X34238 | 79641 ROGDI      | -0,604887949 |
| GSE40272 | X31713 | 2580 GAK         | -0,604747886 |
| GSE40272 | X14327 | 440271 LOC440271 | -0,604374207 |
| GSE40272 | X43400 | 6610 SMPD2       | -0,604294397 |
| GSE40272 | X20576 | 81794 ADAMTS10   | -0,604284884 |
| GSE40272 | X15383 | 9246 UBE2L6      | -0,604108879 |
| GSE40272 | X11310 | 79144 PDPF       | -0,603994715 |
| GSE40272 | X15918 | 1889 ECE1        | -0,603558668 |
| GSE40272 | X31158 | 8241 RBM10       | -0,603514799 |
| GSE40272 | X14076 | 401065 LOC401065 | -0,603462474 |
| GSE40272 | X1576  | 9524 TECR        | -0,602688689 |
| GSE40272 | X1696  | 442145 LOC442145 | -0,602249471 |
| GSE40272 | X13687 | 79643 CHMP6      | -0,601926533 |
| GSE40272 | X20031 | 7094 TLN1        | -0,601701903 |
| GSE40272 | X24944 | 347088 GPR144    | -0,60159408  |
| GSE40272 | X35577 | 23185 LARP4B     | -0,60091649  |
| GSE40272 | X14060 | 5326 PLAGL2      | -0,600655391 |
| GSE40272 | X37828 | 1107 CHD3        | -0,600528541 |
| GSE40272 | X42018 | 23001 WDFY3      | -0,600415962 |
| GSE40272 | X10730 | 9149 DYRK1B      | -0,599772199 |
| GSE40272 | X14955 | 51816 CECR1      | -0,599682875 |
| GSE40272 | X1570  | 401911 RPL29P33  | -0,599478858 |
| GSE40272 | X32509 | 2002 ELK1        | -0,599352537 |
| GSE40272 | X37160 | 8751 ADAM15      | -0,59934408  |
| GSE40272 | X11966 | 8209 C21orf33    | -0,599106237 |
| GSE40272 | X18710 | 1995 ELAVL3      | -0,599033298 |
| GSE40272 | X7342  | 55898 UNC45A     | -0,598842495 |
| GSE40272 | X16281 | 3297 HSF1        | -0,598805497 |
| GSE40272 | X4668  | 441221 LOC441221 | -0,59845666  |
| GSE40272 | X41985 | 23095 KIF1B      | -0,598309197 |
| GSE40272 | X41308 | 27125 AFF4       | -0,598122622 |
| GSE40272 | X41066 | 5795 PTPRJ       | -0,598010042 |
| GSE40272 | X22617 | 3329 HSPD1       | -0,597845666 |
| GSE40272 | X3767  | 146547 PRSS36    | -0,597511628 |
| GSE40272 | X13956 | 115098 CCDC124   | -0,597005285 |
| GSE40272 | X16280 | 120 ADD3         | -0,596847252 |
| GSE40272 | X22910 | 25 ABL1          | -0,596752114 |
| GSE40272 | X12583 | 394 ARHGAP5      | -0,596124207 |
| GSE40272 | X8641  | 4952 OCRL        | -0,59610148  |

Supplementary\_table\_S3

|          |        |                 |              |
|----------|--------|-----------------|--------------|
| GSE40272 | X28376 | 79092 CARD14    | -0,595738372 |
| GSE40272 | X12593 | 23476 BRD4      | -0,595106765 |
| GSE40272 | X15940 | 57396 CLK4      | -0,594819767 |
| GSE40272 | X35768 | 23001 WDFY3     | -0,594662791 |
| GSE40272 | X15381 | 64601 VPS16     | -0,594562896 |
| GSE40272 | X14176 | 351 APP         | -0,59436945  |
| GSE40272 | X17507 | 4234 METTL1     | -0,594274841 |
| GSE40272 | X40977 | 9230 RAB11B     | -0,594224101 |
| GSE40272 | X36945 | 6576 SLC25A1    | -0,593944503 |
| GSE40272 | X11680 | 5430 POLR2A     | -0,593867865 |
| GSE40272 | X37966 | 4152 MBD1       | -0,593842495 |
| GSE40272 | X22990 | 4214 MAP3K1     | -0,593820825 |
| GSE40272 | X25880 | 79368 FCRL2     | -0,593086681 |
| GSE40272 | X4994  | 10067 SCAMP3    | -0,592390592 |
| GSE40272 | X15967 | 6314 ATXN7      | -0,592291226 |
| GSE40272 | X30977 | 57216 VANG1     | -0,592138478 |
| GSE40272 | X17469 | 55527 FEM1A     | -0,591552854 |
| GSE40272 | X16422 | 144983 HNRNP1L2 | -0,59132241  |
| GSE40272 | X20293 | 26505 CNNM3     | -0,591290169 |
| GSE40272 | X11428 | 351 APP         | -0,591257928 |
| GSE40272 | X42153 | 4035 LRP1       | -0,591063425 |
| GSE40272 | X41100 | 5297 PI4KA      | -0,591024313 |
| GSE40272 | X32117 | 51700 CYB5R2    | -0,590901691 |
| GSE40272 | X23791 | 6294 SAFB       | -0,590680761 |
| GSE40272 | X30663 | 11316 COPE      | -0,590352008 |
| GSE40272 | X36047 | 79007 DBNDD1    | -0,590321353 |
| GSE40272 | X37317 | 23129 PLXND1    | -0,590051797 |
| GSE40272 | X23274 | 84305 WIBG      | -0,590036469 |
| GSE40272 | X707   | 8668 EIF3I      | -0,589904863 |
| GSE40272 | X8989  | 11155 LDB3      | -0,589236258 |
| GSE40272 | X15024 | 257364 SNX33    | -0,58915222  |
| GSE40272 | X37933 | 5606 MAP2K3     | -0,588665962 |
| GSE40272 | X36004 | 79924 ADM2      | -0,588512685 |
| GSE40272 | X24410 | 284415 VSTM1    | -0,588354123 |
| GSE40272 | X8243  | 5297 PI4KA      | -0,58830444  |
| GSE40272 | X35405 | 29882 ANAPC2    | -0,588229915 |
| GSE40272 | X7886  | 5339 PLEC       | -0,58822093  |
| GSE40272 | X1001  | 79575 ABHD8     | -0,588059197 |
| GSE40272 | X18724 | 83692 CD99L2    | -0,587938689 |
| GSE40272 | X33882 | 8573 CASK       | -0,58734408  |
| GSE40272 | X26946 | 1509 CTSD       | -0,587103594 |
| GSE40272 | X13145 | 6778 STAT6      | -0,586973044 |
| GSE40272 | X2201  | 55152 DALRD3    | -0,586729915 |
| GSE40272 | X40106 | 11313 LYPLA2    | -0,586386364 |
| GSE40272 | X23299 | 4781 NFIB       | -0,585374207 |
| GSE40272 | X34390 | 3892 KRT86      | -0,585314482 |
| GSE40272 | X21665 | 2130 EWSR1      | -0,584909619 |
| GSE40272 | X33611 | 5037 PEBP1      | -0,584799683 |
| GSE40272 | X635   | 1019 CDK4       | -0,584525899 |
| GSE40272 | X4105  | 7094 TLN1       | -0,584411734 |
| GSE40272 | X19301 | 2909 ARHGAP35   | -0,584042283 |
| GSE40272 | X764   | 1265 CNN2       | -0,583795983 |
| GSE40272 | X14461 | 1509 CTSD       | -0,583200317 |

# Supplementary\_table\_S3

|          |        |                  |              |
|----------|--------|------------------|--------------|
| GSE40272 | X11148 | 56243 KIAA1217   | -0,583128436 |
| GSE40272 | X29921 | 8396 PIP4K2B     | -0,583090909 |
| GSE40272 | X9413  | 80255 SLC35F5    | -0,583078224 |
| GSE40272 | X12817 | 23234 DNAJC9     | -0,583054968 |
| GSE40272 | X30046 | 7023 TFAP4       | -0,58282241  |
| GSE40272 | X7935  | 29984 RHOD       | -0,582751057 |
| GSE40272 | X27022 | 9334 B4GALT5     | -0,582245772 |
| GSE40272 | X11408 | 55250 ELP2       | -0,582026427 |
| GSE40272 | X41589 | 7916 PRRC2A      | -0,581865222 |
| GSE40272 | X3127  | 140460 ASB7      | -0,581850423 |
| GSE40272 | X22375 | 79947 DHDDS      | -0,581832452 |
| GSE40272 | X12806 | 23341 DNAJC16    | -0,581319767 |
| GSE40272 | X37768 | 56949 XAB2       | -0,580899577 |
| GSE40272 | X18809 | 10902 BRD8       | -0,58073203  |
| GSE40272 | X9379  | 3611 ILK         | -0,580658034 |
| GSE40272 | X6750  | 29763 PACSIN3    | -0,580504757 |
| GSE40272 | X4695  | 91300 C19orf22   | -0,580467759 |
| GSE40272 | X5147  | 794 CALB2        | -0,580006342 |
| GSE40272 | X35795 | 4784 NFIX        | -0,579636364 |
| GSE40272 | X20879 | 11078 TRIOBP     | -0,578858351 |
| GSE40272 | X43465 | 3933 LCN1        | -0,578646934 |
| GSE40272 | X33697 | 3156 HMGCR       | -0,578578753 |
| GSE40272 | X28352 | 442403 LOC442403 | -0,578528541 |
| GSE40272 | X27234 | 3190 HNRNPK      | -0,578453488 |
| GSE40272 | X24379 | 64866 CDCP1      | -0,578365222 |
| GSE40272 | X26273 | 351 APP          | -0,578347252 |
| GSE40272 | X40929 | 90161 HS6ST2     | -0,57822463  |
| GSE40272 | X23967 | 285444 LOC285444 | -0,577935518 |
| GSE40272 | X10784 | 5709 PSMD3       | -0,577780655 |
| GSE40272 | X44386 | 56910 STARD7     | -0,577674947 |
| GSE40272 | X9365  | 146206 RLTPR     | -0,577649577 |
| GSE40272 | X42844 | 6813 STXBP2      | -0,577617865 |
| GSE40272 | X21498 | 54434 SSH1       | -0,577469873 |
| GSE40272 | X35366 | 23476 BRD4       | -0,577182347 |
| GSE40272 | X38584 | 8704 B4GALT2     | -0,577127378 |
| GSE40272 | X2023  | 5150 PDE7A       | -0,576988372 |
| GSE40272 | X33582 | 83475 DOHH       | -0,576961416 |
| GSE40272 | X503   | 4651 MYO10       | -0,576951374 |
| GSE40272 | X12048 | 5089 PBX2        | -0,576936575 |
| GSE40272 | X43962 | 551 AVP          | -0,576936575 |
| GSE40272 | X38253 | 91219 FAM108A6P  | -0,576469345 |
| GSE40272 | X16293 | 84920 ALG10      | -0,576462474 |
| GSE40272 | X16971 | 3782 KCNN3       | -0,576312368 |
| GSE40272 | X3171  | 2783 GNB2        | -0,576196617 |
| GSE40272 | X43846 | 23112 TNRC6B     | -0,576133721 |
| GSE40272 | X24159 | 151987 PPP4R2    | -0,575983615 |
| GSE40272 | X11068 | 11338 U2AF2      | -0,575511099 |
| GSE40272 | X18026 | 4035 LRP1        | -0,57522833  |
| GSE40272 | X42294 | 9817 KEAP1       | -0,575063425 |
| GSE40272 | X7040  | 4035 LRP1        | -0,575035941 |
| GSE40272 | X13144 | 401180 LOC401180 | -0,5750037   |
| GSE40272 | X32636 | 442206 GPR166P   | -0,574976744 |
| GSE40272 | X35664 | 4952 OCRL        | -0,574609937 |

# Supplementary\_table\_S3

|          |        |                 |              |
|----------|--------|-----------------|--------------|
| GSE40272 | X41136 | 26043 UBXN7     | -0,574600423 |
| GSE40272 | X9778  | 5297 PI4KA      | -0,574273784 |
| GSE40272 | X5671  | 535 ATP6V0A1    | -0,573758457 |
| GSE40272 | X37425 | 147991 DPY19L3  | -0,573430761 |
| GSE40272 | X3630  | 55898 UNC45A    | -0,573304968 |
| GSE40272 | X15223 | 84922 FIZ1      | -0,573162791 |
| GSE40272 | X30722 | 23181 DIP2A     | -0,572896934 |
| GSE40272 | X9199  | 2909 ARHGAP35   | -0,572724101 |
| GSE40272 | X24729 | 81698 C15orf5   | -0,572708245 |
| GSE40272 | X12356 | 351 APP         | -0,57266649  |
| GSE40272 | X37744 | 9781 RNF144A    | -0,57260148  |
| GSE40272 | X4455  | 26469 PTPN18    | -0,572379493 |
| GSE40272 | X8202  | 5609 MAP2K7     | -0,572290698 |
| GSE40272 | X2225  | 7402 UTRN       | -0,572201903 |
| GSE40272 | X37272 | 135 ADORA2A     | -0,570696089 |
| GSE40272 | X34565 | 80790 CMIP      | -0,570673362 |
| GSE40272 | X30198 | 51763 INPP5K    | -0,570621564 |
| GSE40272 | X34736 | 4952 OCRL       | -0,570606237 |
| GSE40272 | X8266  | 27243 CHMP2A    | -0,570590909 |
| GSE40272 | X716   | 23677 SH3BP4    | -0,570487315 |
| GSE40272 | X33766 | 51 ACOX1        | -0,570244715 |
| GSE40272 | X9580  | 338785 KRT79    | -0,569962474 |
| GSE40272 | X14212 | 351 APP         | -0,569876321 |
| GSE40272 | X9349  | 8396 PIP4K2B    | -0,569855708 |
| GSE40272 | X15906 | 283578 TMED8    | -0,569553383 |
| GSE40272 | X38579 | 3665 IRF7       | -0,569469873 |
| GSE40272 | X27421 | 6618 SNAPC2     | -0,569456131 |
| GSE40272 | X16576 | 5316 PKNX1      | -0,569022727 |
| GSE40272 | X19983 | 6795 AURKC      | -0,568911734 |
| GSE40272 | X20952 | 11335 CBX3      | -0,568696617 |
| GSE40272 | X33767 | 23499 MACF1     | -0,568448732 |
| GSE40272 | X28300 | 23759 PPIL2     | -0,568438689 |
| GSE40272 | X13536 | 7094 TLN1       | -0,56819186  |
| GSE40272 | X34032 | 9746 CLSTN3     | -0,568178647 |
| GSE40272 | X26240 | 79701 C17orf101 | -0,567996829 |
| GSE40272 | X9445  | 54461 FBXW5     | -0,567937632 |
| GSE40272 | X863   | 9150 CTDP1      | -0,567915962 |
| GSE40272 | X38328 | 10423 CDIPT     | -0,567383192 |
| GSE40272 | X41159 | 348995 NUP43    | -0,567219873 |
| GSE40272 | X21488 | 11142 PKIG      | -0,566519556 |
| GSE40272 | X23723 | 84798 C19orf48  | -0,566374207 |
| GSE40272 | X37578 | 1912 PHC2       | -0,566324524 |
| GSE40272 | X2625  | 5297 PI4KA      | -0,566285941 |
| GSE40272 | X38686 | 11168 PSIP1     | -0,565739429 |
| GSE40272 | X31064 | 6844 VAMP2      | -0,56562315  |
| GSE40272 | X28137 | 118460 EXOSC6   | -0,565561311 |
| GSE40272 | X41797 | 9618 TRAF4      | -0,565209302 |
| GSE40272 | X8391  | 8926 SNURF      | -0,564908034 |
| GSE40272 | X24041 | 23133 PHF8      | -0,564615751 |
| GSE40272 | X28707 | 79813 EHMT1     | -0,56457981  |
| GSE40272 | X19186 | 8720 MBTPS1     | -0,564475159 |
| GSE40272 | X12098 | 9416 DDX23      | -0,564228858 |
| GSE40272 | X31973 | 4839 NOP2       | -0,564133192 |

# Supplementary\_table\_S3

|          |        |                  |              |
|----------|--------|------------------|--------------|
| GSE40272 | X38695 | 79031 PDCL3      | -0,5639963   |
| GSE40272 | X19423 | 954 ENTPD2       | -0,56394926  |
| GSE40272 | X229   | 54880 BCOR       | -0,563919662 |
| GSE40272 | X41160 | 55002 TMCO3      | -0,563788055 |
| GSE40272 | X9016  | 29123 ANKRD11    | -0,563733615 |
| GSE40272 | X6367  | 26154 ABCA12     | -0,563026956 |
| GSE40272 | X40991 | 23400 ATP13A2    | -0,563026956 |
| GSE40272 | X22842 | 9049 AIP         | -0,562969345 |
| GSE40272 | X39527 | 51228 GLTP       | -0,562789112 |
| GSE40272 | X15825 | 8672 EIF4G3      | -0,562765328 |
| GSE40272 | X8746  | 4035 LRP1        | -0,562696617 |
| GSE40272 | X18272 | 201163 FLCN      | -0,562427061 |
| GSE40272 | X5893  | 5352 PLOD2       | -0,562302326 |
| GSE40272 | X38902 | 79966 SCD5       | -0,562169662 |
| GSE40272 | X345   | 26226 FBXW4P1    | -0,562033827 |
| GSE40272 | X1189  | 23001 WDFY3      | -0,561742072 |
| GSE40272 | X22561 | 351 APP          | -0,561356765 |
| GSE40272 | X24587 | 114049 WBSCR22   | -0,561347252 |
| GSE40272 | X16008 | 54867 TMEM214    | -0,561179704 |
| GSE40272 | X3098  | 1774 DNASE1L1    | -0,560953488 |
| GSE40272 | X43232 | 7094 TLN1        | -0,560904334 |
| GSE40272 | X36928 | 29934 SNX12      | -0,560465645 |
| GSE40272 | X460   | 10454 TAB1       | -0,560169662 |
| GSE40272 | X18891 | 9859 CEP170      | -0,56013055  |
| GSE40272 | X13833 | 1500 CTNND1      | -0,559875793 |
| GSE40272 | X355   | 55227 LRRC1      | -0,5595      |
| GSE40272 | X13521 | 7317 UBA1        | -0,559451374 |
| GSE40272 | X7341  | 10922 FASTK      | -0,558758457 |
| GSE40272 | X30338 | 23633 KPNA6      | -0,558469873 |
| GSE40272 | X22388 | 283554 GPR137C   | -0,558264799 |
| GSE40272 | X27552 | 3241 HPCAL1      | -0,558200317 |
| GSE40272 | X29955 | 55719 FAM178A    | -0,557819239 |
| GSE40272 | X26776 | 80856 KIAA1715   | -0,557607294 |
| GSE40272 | X13608 | 4719 NDUFS1      | -0,557364165 |
| GSE40272 | X20664 | 5465 PPARA       | -0,557207188 |
| GSE40272 | X23405 | 55073 LRRC37A4   | -0,556958774 |
| GSE40272 | X9535  | 6601 SMARCC2     | -0,556484672 |
| GSE40272 | X30239 | 6185 RPN2        | -0,556348837 |
| GSE40272 | X33235 | 54958 TMEM160    | -0,556233087 |
| GSE40272 | X27845 | 3251 HPRT1       | -0,556171247 |
| GSE40272 | X6510  | 7067 THRA        | -0,556112051 |
| GSE40272 | X14990 | 10365 KLF2       | -0,556002643 |
| GSE40272 | X17732 | 23030 KDM4B      | -0,555954017 |
| GSE40272 | X19780 | 351 APP          | -0,555825053 |
| GSE40272 | X39332 | 9817 KEAP1       | -0,555434989 |
| GSE40272 | X38876 | 55827 DCAF6      | -0,555088795 |
| GSE40272 | X23741 | 5430 POLR2A      | -0,554917019 |
| GSE40272 | X17688 | 64223 MLST8      | -0,554900634 |
| GSE40272 | X5335  | 10362 HMG20B     | -0,554742072 |
| GSE40272 | X20241 | 23646 PLD3       | -0,55457981  |
| GSE40272 | X5422  | 391014 LOC391014 | -0,554536469 |
| GSE40272 | X41657 | 57447 NDRG2      | -0,554318182 |
| GSE40272 | X18802 | 4924 NUCB1       | -0,554087209 |

# Supplementary\_table\_S3

|          |        |                  |              |
|----------|--------|------------------|--------------|
| GSE40272 | X11018 | 55069 C7orf42    | -0,553711416 |
| GSE40272 | X10465 | 5297 PI4KA       | -0,553643763 |
| GSE40272 | X16882 | 6625 SNRNP70     | -0,553621036 |
| GSE40272 | X1386  | 6928 HNF1B       | -0,553598309 |
| GSE40272 | X34047 | 6405 SEMA3F      | -0,553528541 |
| GSE40272 | X23030 | 8189 SYMPK       | -0,553422833 |
| GSE40272 | X5502  | 158056 MAMDC4    | -0,552692389 |
| GSE40272 | X10500 | 351 APP          | -0,552681818 |
| GSE40272 | X19696 | 6460 SH3GLP3     | -0,552510042 |
| GSE40272 | X14998 | 150372 NFAM1     | -0,552281712 |
| GSE40272 | X28827 | 8396 PIP4K2B     | -0,552045455 |
| GSE40272 | X7135  | 51548 SIRT6      | -0,55180444  |
| GSE40272 | X31272 | 22800 RRAS2      | -0,551755285 |
| GSE40272 | X13866 | 147040 KCTD11    | -0,551414905 |
| GSE40272 | X16743 | 255057 C19orf26  | -0,551126321 |
| GSE40272 | X5376  | 441468 LOC441468 | -0,551113636 |
| GSE40272 | X25704 | 10106 CTDSP2     | -0,550252643 |
| GSE40272 | X2295  | 57120 GOPC       | -0,55005074  |
| GSE40272 | X40447 | 7094 TLN1        | -0,550008985 |
| GSE40272 | X38788 | 1628 DBP         | -0,549140063 |
| GSE40272 | X42253 | 54622 ARL15      | -0,548904334 |
| GSE40272 | X41222 | 79134 TMEM185B   | -0,548822939 |
| GSE40272 | X28084 | 7090 TLE3        | -0,548597252 |
| GSE40272 | X9578  | 1306 COL15A1     | -0,548356237 |
| GSE40272 | X6785  | 4952 OCRL        | -0,547331924 |
| GSE40272 | X37812 | 6182 MRPL12      | -0,547321882 |
| GSE40272 | X31130 | 4641 MYO1C       | -0,547265856 |
| GSE40272 | X36458 | 23499 MACF1      | -0,546575581 |
| GSE40272 | X23237 | 9024 BRSK2       | -0,546362579 |
| GSE40272 | X22372 | 84304 NUDT22     | -0,546317125 |
| GSE40272 | X19112 | 191 AHCY         | -0,54607611  |
| GSE40272 | X16320 | 7094 TLN1        | -0,545994715 |
| GSE40272 | X16586 | 35 ACADS         | -0,545911734 |
| GSE40272 | X27652 | 1453 CSNK1D      | -0,545839323 |
| GSE40272 | X12605 | 5430 POLR2A      | -0,545444503 |
| GSE40272 | X30614 | 4214 MAP3K1      | -0,545060782 |
| GSE40272 | X28421 | 23001 WDFY3      | -0,544968816 |
| GSE40272 | X24669 | 60 ACTB          | -0,544735201 |
| GSE40272 | X27553 | 29888 STRN4      | -0,544593023 |
| GSE40272 | X6696  | 285671 RNF180    | -0,544569239 |
| GSE40272 | X27691 | 9563 H6PD        | -0,544223044 |
| GSE40272 | X31387 | 390704 LOC390704 | -0,544041755 |
| GSE40272 | X28140 | 353324 SPATA12   | -0,543985201 |
| GSE40272 | X9350  | 8775 NAPA        | -0,543754757 |
| GSE40272 | X36459 | 1174 AP1S1       | -0,543357294 |
| GSE40272 | X2377  | 10488 CREB3      | -0,542938161 |
| GSE40272 | X35773 | 2621 GAS6        | -0,542838795 |
| GSE40272 | X26739 | 51043 ZBTB7B     | -0,542582452 |
| GSE40272 | X10436 | 114049 WBSCR22   | -0,542513214 |
| GSE40272 | X18977 | 158801 NKAPP1    | -0,542207188 |
| GSE40272 | X4908  | 64601 VPS16      | -0,541697674 |
| GSE40272 | X42411 | 51154 MRTO4      | -0,541654334 |
| GSE40272 | X36343 | 5297 PI4KA       | -0,541646406 |

Supplementary\_table\_S3

|          |        |                  |              |
|----------|--------|------------------|--------------|
| GSE40272 | X37020 | 84971 ATG4D      | -0,54162685  |
| GSE40272 | X38087 | 11333 PDAP1      | -0,541255814 |
| GSE40272 | X38512 | 6687 SPG7        | -0,541150106 |
| GSE40272 | X19844 | 81567 TXNDC5     | -0,540939746 |
| GSE40272 | X9983  | 58508 MLL3       | -0,540859408 |
| GSE40272 | X13454 | 6942 TCF20       | -0,540796512 |
| GSE40272 | X31317 | 23770 FKBP8      | -0,540509514 |
| GSE40272 | X6221  | 122525 C14orf28  | -0,540419662 |
| GSE40272 | X14682 | 387266 KRTAP5-3  | -0,540180233 |
| GSE40272 | X33658 | 114907 FBXO32    | -0,539676533 |
| GSE40272 | X41500 | 83544 DNAL1      | -0,539486786 |
| GSE40272 | X30773 | 10401 PIAS3      | -0,539417019 |
| GSE40272 | X26811 | 113452 TMEM54    | -0,538603066 |
| GSE40272 | X11797 | 8694 DGAT1       | -0,538362579 |
| GSE40272 | X292   | 4952 OCRL        | -0,538337209 |
| GSE40272 | X10991 | 54802 TRIT1      | -0,538057082 |
| GSE40272 | X36358 | 23001 WDFY3      | -0,537914905 |
| GSE40272 | X9504  | 60558 GUF1       | -0,537709302 |
| GSE40272 | X8366  | 9391 CIAO1       | -0,537558668 |
| GSE40272 | X5225  | 6141 RPL18       | -0,537526956 |
| GSE40272 | X10039 | 285741 LOC285741 | -0,537442389 |
| GSE40272 | X30513 | 29979 UBQLN1     | -0,53732981  |
| GSE40272 | X21000 | 23499 MACF1      | -0,5372463   |
| GSE40272 | X11457 | 5434 POLR2E      | -0,53721723  |
| GSE40272 | X4780  | 375513 GUSBP4    | -0,536828224 |
| GSE40272 | X35058 | 286336 FAM78A    | -0,536715116 |
| GSE40272 | X5717  | 28964 GIT1       | -0,536437104 |
| GSE40272 | X20958 | 5430 POLR2A      | -0,536046512 |
| GSE40272 | X41232 | 4952 OCRL        | -0,535850423 |
| GSE40272 | X35302 | 60314 C12orf10   | -0,535549683 |
| GSE40272 | X1487  | 54785 C17orf59   | -0,535086152 |
| GSE40272 | X17686 | 977 CD151        | -0,534437104 |
| GSE40272 | X3744  | 10794 ZNF460     | -0,53412685  |
| GSE40272 | X39224 | 5528 PPP2R5D     | -0,533473573 |
| GSE40272 | X22908 | 8522 GAS7        | -0,532165433 |
| GSE40272 | X33913 | 7430 EZR         | -0,532163848 |
| GSE40272 | X20440 | 440357 LOC440357 | -0,532008985 |
| GSE40272 | X22806 | 64236 PDLIM2     | -0,532005814 |
| GSE40272 | X10241 | 5822 PWP2        | -0,531992072 |
| GSE40272 | X41774 | 10945 KDELR1     | -0,531755814 |
| GSE40272 | X2946  | 54880 BCOR       | -0,531519027 |
| GSE40272 | X26299 | 55206 SBNO1      | -0,531113636 |
| GSE40272 | X22412 | 6132 RPL8        | -0,530903805 |
| GSE40272 | X19882 | 4035 LRP1        | -0,530602537 |
| GSE40272 | X12585 | 23145 SSPO       | -0,530596195 |
| GSE40272 | X33297 | 9567 GTPBP1      | -0,529791226 |
| GSE40272 | X29413 | 6510 SLC1A5      | -0,529694503 |
| GSE40272 | X18271 | 90522 YIF1B      | -0,529684461 |
| GSE40272 | X34395 | 11101 ATE1       | -0,528965116 |
| GSE40272 | X21038 | 5130 PCYT1A      | -0,52830074  |
| GSE40272 | X42663 | 65979 PHACTR4    | -0,528252643 |
| GSE40272 | X8380  | 441221 LOC441221 | -0,528039641 |
| GSE40272 | X18953 | 7094 TLN1        | -0,5277537   |



# Supplementary\_table\_S3

|          |        |                      |              |
|----------|--------|----------------------|--------------|
| GSE40272 | X26937 | 51132 RLIM           | -0,527210359 |
| GSE40272 | X11905 | 23001 WDFY3          | -0,527096723 |
| GSE40272 | X39004 | 4946 OAZ1            | -0,526872093 |
| GSE40272 | X38807 | 79068 FTO            | -0,526459831 |
| GSE40272 | X17643 | 2987 GUK1            | -0,525979387 |
| GSE40272 | X38179 | 54946 SLC41A3        | -0,525910148 |
| GSE40272 | X502   | 55227 LRRC1          | -0,525813425 |
| GSE40272 | X17164 | 3983 ABLIM1          | -0,525728858 |
| GSE40272 | X40937 | 2976 GTF3C2          | -0,525719873 |
| GSE40272 | X24163 | 442328 LOC442328     | -0,525016385 |
| GSE40272 | X2551  | 7343 UBTf            | -0,524122622 |
| GSE40272 | X1455  | 1613 DAPK3           | -0,523987315 |
| GSE40272 | X27633 | 80725 SRCIN1         | -0,523986786 |
| GSE40272 | X34466 | 284187 DKFZp761P0212 | -0,523551268 |
| GSE40272 | X27568 | 6576 SLC25A1         | -0,523341966 |
| GSE40272 | X41890 | 284749 LOC284749     | -0,523071353 |
| GSE40272 | X8895  | 7094 TLN1            | -0,522832981 |
| GSE40272 | X13699 | 57105 CYSLTR2        | -0,521696089 |
| GSE40272 | X38591 | 4035 LRP1            | -0,521318182 |
| GSE40272 | X11695 | 57720 GPR107         | -0,521312368 |
| GSE40272 | X40721 | 57062 DDX24          | -0,520983087 |
| GSE40272 | X43764 | 8502 PKP4            | -0,520874207 |
| GSE40272 | X20331 | 7260 TSSC1           | -0,52017389  |
| GSE40272 | X39439 | 25970 SH2B1          | -0,520078224 |
| GSE40272 | X42285 | 4928 NUP98           | -0,519995772 |
| GSE40272 | X517   | 2776 GNAQ            | -0,519336681 |
| GSE40272 | X33563 | 22913 RALY           | -0,518815011 |
| GSE40272 | X14907 | 23499 MACF1          | -0,518637421 |
| GSE40272 | X38561 | 400729 LOC400729     | -0,518487315 |
| GSE40272 | X29286 | 401607 LOC401607     | -0,518267442 |
| GSE40272 | X7930  | 8425 LTBP4           | -0,518248943 |
| GSE40272 | X30388 | 5936 RBM4            | -0,518211945 |
| GSE40272 | X16298 | 28973 MRPS18B        | -0,517326638 |
| GSE40272 | X39276 | 3712 IVD             | -0,516719873 |
| GSE40272 | X5628  | 23001 WDFY3          | -0,516383192 |
| GSE40272 | X38212 | 4173 MCM4            | -0,516258457 |
| GSE40272 | X24588 | 64924 SLC30A5        | -0,515714588 |
| GSE40272 | X19840 | 441133 KRT18P38      | -0,515628964 |
| GSE40272 | X7945  | 347735 SERINC2       | -0,515278013 |
| GSE40272 | X10370 | 84679 SLC9A7         | -0,514528013 |
| GSE40272 | X19091 | 8926 SNURF           | -0,514526956 |
| GSE40272 | X14629 | 11338 U2AF2          | -0,51444926  |
| GSE40272 | X22434 | 6709 SPTAN1          | -0,514104123 |
| GSE40272 | X30202 | 10749 KIF1C          | -0,513997357 |
| GSE40272 | X15269 | 57666 FBRSL1         | -0,513376321 |
| GSE40272 | X1554  | 23499 MACF1          | -0,513141121 |
| GSE40272 | X35555 | 4952 OCRL            | -0,512469873 |
| GSE40272 | X13284 | 351 APP              | -0,511865222 |
| GSE40272 | X1597  | 10521 DDX17          | -0,511864693 |
| GSE40272 | X3489  | 1454 CSNK1E          | -0,511801268 |
| GSE40272 | X26148 | 81857 MED25          | -0,510929704 |
| GSE40272 | X11617 | 886 CCKAR            | -0,510757928 |
| GSE40272 | X38589 | 4035 LRP1            | -0,51065592  |

# Supplementary\_table\_S3

|          |        |                  |              |
|----------|--------|------------------|--------------|
| GSE40272 | X24216 | 1975 EIF4B       | -0,510111522 |
| GSE40272 | X16414 | 6601 SMARCC2     | -0,509267442 |
| GSE40272 | X8816  | 23353 SUN1       | -0,50894926  |
| GSE40272 | X34403 | 4849 CNOT3       | -0,506915962 |
| GSE40272 | X14767 | 8455 ATRN        | -0,505822939 |
| GSE40272 | X546   | 27341 RRP7A      | -0,505683404 |
| GSE40272 | X5705  | 2496 FTH1P1      | -0,505137949 |
| GSE40272 | X25330 | 118987 PDZD8     | -0,504382664 |
| GSE40272 | X36036 | 1523 CUX1        | -0,504272727 |
| GSE40272 | X20935 | 388454 LOC388454 | -0,504193446 |
| GSE40272 | X33997 | 81 ACTN4         | -0,504054968 |
| GSE40272 | X15690 | 5725 PTBP1       | -0,503631078 |
| GSE40272 | X5192  | 80772 GLTPD1     | -0,503504228 |
| GSE40272 | X10848 | 4054 LTBP3       | -0,503337209 |
| GSE40272 | X32083 | 80700 UBXN6      | -0,503187104 |
| GSE40272 | X4721  | 6418 SET         | -0,503117336 |
| GSE40272 | X33327 | 22839 DLGAP4     | -0,502296512 |
| GSE40272 | X39034 | 10314 LANCL1     | -0,502221987 |
| GSE40272 | X11727 | 1973 EIF4A1      | -0,502001057 |
| GSE40272 | X5032  | 10994 ILVBL      | -0,501755814 |
| GSE40272 | X1130  | 390354 RPL18AP3  | -0,501727273 |
| GSE40272 | X23349 | 9567 GTPBP1      | -0,501376321 |
| GSE40272 | X17470 | 440245 LOC440245 | -0,500639006 |
| GSE40272 | X14086 | 116369 SLC26A8   | -0,500264271 |
| GSE40272 | X41719 | 22839 DLGAP4     | -0,499439218 |
| GSE40272 | X4059  | 60672 MIIP       | -0,498706131 |
| GSE40272 | X6262  | 131540 ZDHHC19   | -0,498593552 |
| GSE40272 | X21400 | 64320 RNF25      | -0,498197674 |
| GSE40272 | X39623 | 283651 HMGN2P46  | -0,498179175 |
| GSE40272 | X38687 | 8751 ADAM15      | -0,498091438 |
| GSE40272 | X6575  | 2819 GPD1        | -0,497986786 |
| GSE40272 | X44444 | 170463 SSBP4     | -0,497246829 |
| GSE40272 | X19353 | 64924 SLC30A5    | -0,497045455 |
| GSE40272 | X12152 | 162632 LOC162632 | -0,496730973 |
| GSE40272 | X2198  | 8932 MBD2        | -0,496337209 |
| GSE40272 | X8896  | 5430 POLR2A      | -0,496247357 |
| GSE40272 | X17337 | 3609 ILF3        | -0,494972516 |
| GSE40272 | X43229 | 7094 TLN1        | -0,493886892 |
| GSE40272 | X20022 | 10922 FASTK      | -0,493721459 |
| GSE40272 | X18463 | 23295 MGRN1      | -0,493639535 |
| GSE40272 | X19065 | 60672 MIIP       | -0,493413848 |
| GSE40272 | X64    | 23499 MACF1      | -0,493330338 |
| GSE40272 | X18733 | 64319 FBR3       | -0,492719345 |
| GSE40272 | X24757 | 23001 WDFY3      | -0,492479387 |
| GSE40272 | X30160 | 3609 ILF3        | -0,49202907  |
| GSE40272 | X24981 | 5351 PLOD1       | -0,49202537  |
| GSE40272 | X30441 | 1119 CHKA        | -0,491896406 |
| GSE40272 | X31362 | 23399 CTDNEP1    | -0,491582981 |
| GSE40272 | X42722 | 55001 TTC22      | -0,491489429 |
| GSE40272 | X7926  | 7536 SF1         | -0,491133721 |
| GSE40272 | X8456  | 9830 TRIM14      | -0,490599894 |
| GSE40272 | X44260 | 7001 PRDX2       | -0,489884249 |
| GSE40272 | X13158 | 9381 OTOF        | -0,489707717 |

# Supplementary\_table\_S3

|          |        |                  |              |
|----------|--------|------------------|--------------|
| GSE40272 | X11277 | 5878 RAB5C       | -0,489604651 |
| GSE40272 | X31486 | 1903 S1PR3       | -0,489603066 |
| GSE40272 | X15604 | 64423 INF2       | -0,489261628 |
| GSE40272 | X36114 | 51386 EIF3L      | -0,489178647 |
| GSE40272 | X26932 | 9807 IP6K1       | -0,488477273 |
| GSE40272 | X27446 | 11083 DIDO1      | -0,488453488 |
| GSE40272 | X34348 | 5395 PMS2        | -0,488313953 |
| GSE40272 | X5505  | 51150 SDF4       | -0,487689746 |
| GSE40272 | X38603 | 137994 LETM2     | -0,487626321 |
| GSE40272 | X37385 | 5297 PI4KA       | -0,487516385 |
| GSE40272 | X9552  | 79629 OCEL1      | -0,487113108 |
| GSE40272 | X21714 | 6598 SMARCB1     | -0,486998943 |
| GSE40272 | X27978 | 440359 CSDAP1    | -0,486759514 |
| GSE40272 | X26787 | 10477 UBE2E3     | -0,48662685  |
| GSE40272 | X19436 | 80005 DOCK5      | -0,486201374 |
| GSE40272 | X13939 | 6618 SNAPC2      | -0,485996829 |
| GSE40272 | X3609  | 8525 DGKZ        | -0,485803383 |
| GSE40272 | X9863  | 54882 ANKHD1     | -0,485225687 |
| GSE40272 | X35080 | 196463 PLBD2     | -0,483646406 |
| GSE40272 | X18876 | 5576 PRKAR2A     | -0,483337738 |
| GSE40272 | X34731 | 6908 TBP         | -0,482922304 |
| GSE40272 | X14085 | 10312 TCIRG1     | -0,482463002 |
| GSE40272 | X13414 | 51341 ZBTB7A     | -0,482328224 |
| GSE40272 | X35902 | 9777 TM9SF4      | -0,48216649  |
| GSE40272 | X41829 | 1059 CENPB       | -0,4820037   |
| GSE40272 | X9202  | 55643 BTBD2      | -0,48180444  |
| GSE40272 | X34971 | 2039 EPB49       | -0,481375264 |
| GSE40272 | X38814 | 143243 LOC143243 | -0,480913848 |
| GSE40272 | X16601 | 83862 TMEM120A   | -0,480858351 |
| GSE40272 | X25110 | 10174 SORBS3     | -0,480591438 |
| GSE40272 | X545   | 400470 LOC400470 | -0,480332452 |
| GSE40272 | X1362  | 112770 C1orf85   | -0,480091966 |
| GSE40272 | X41303 | 10102 TSFM       | -0,479497357 |
| GSE40272 | X8888  | 1742 DLG4        | -0,479302854 |
| GSE40272 | X26059 | 4054 LTBP3       | -0,479010571 |
| GSE40272 | X41919 | 10494 STK25      | -0,478865222 |
| GSE40272 | X32379 | 160 AP2A1        | -0,478725159 |
| GSE40272 | X12285 | 389224 LOC389224 | -0,47851797  |
| GSE40272 | X13187 | 5780 PTPN9       | -0,478454545 |
| GSE40272 | X31289 | 4125 MAN2B1      | -0,478326638 |
| GSE40272 | X41635 | 5315 PKM2        | -0,478108351 |
| GSE40272 | X36552 | 1198 CLK3        | -0,477896406 |
| GSE40272 | X21384 | 10456 HAX1       | -0,477859937 |
| GSE40272 | X11471 | 2355 FOSL2       | -0,477214588 |
| GSE40272 | X12121 | 11215 AKAP11     | -0,476861522 |
| GSE40272 | X3877  | 57805 KIAA1967   | -0,476684461 |
| GSE40272 | X15468 | 375748 C9orf102  | -0,476233087 |
| GSE40272 | X7437  | 11143 KAT7       | -0,476191332 |
| GSE40272 | X13455 | 3098 HK1         | -0,47605444  |
| GSE40272 | X15941 | 148022 TICAM1    | -0,475919133 |
| GSE40272 | X4932  | 4952 OCRL        | -0,474822939 |
| GSE40272 | X43519 | 11167 FSTL1      | -0,474154863 |
| GSE40272 | X845   | 2017 CTTN        | -0,473489429 |

# Supplementary\_table\_S3

|          |        |                  |              |
|----------|--------|------------------|--------------|
| GSE40272 | X43259 | 125950 RAVR1     | -0,473350423 |
| GSE40272 | X35166 | 1453 CSNK1D      | -0,473180761 |
| GSE40272 | X24570 | 54461 FBXW5      | -0,472544397 |
| GSE40272 | X7716  | 4952 OCRL        | -0,471975159 |
| GSE40272 | X25585 | 1394 CRHR1       | -0,471206131 |
| GSE40272 | X10244 | 11100 HNRNPUL1   | -0,471205603 |
| GSE40272 | X26855 | 5479 PPIB        | -0,471056025 |
| GSE40272 | X34849 | 91355 LRP5L      | -0,470849366 |
| GSE40272 | X9152  | 9043 SPAG9       | -0,47042019  |
| GSE40272 | X30222 | 7376 NR1H2       | -0,469946617 |
| GSE40272 | X11774 | 115557 ARHGEF25  | -0,469938689 |
| GSE40272 | X1836  | 389630 FAM90A15  | -0,469909619 |
| GSE40272 | X5871  | 9811 CTIF        | -0,469677061 |
| GSE40272 | X8116  | 57111 RAB25      | -0,469385307 |
| GSE40272 | X37663 | 5430 POLR2A      | -0,469339323 |
| GSE40272 | X6362  | 64924 SLC30A5    | -0,469128964 |
| GSE40272 | X34839 | 5297 PI4KA       | -0,469070296 |
| GSE40272 | X27327 | 283680 LOC283680 | -0,469037526 |
| GSE40272 | X40552 | 11337 GABARAP    | -0,468969873 |
| GSE40272 | X4035  | 23049 SMG1       | -0,468881078 |
| GSE40272 | X3366  | 94239 H2AFV      | -0,468831924 |
| GSE40272 | X3285  | 5636 PRPSAP2     | -0,468103594 |
| GSE40272 | X1451  | 8148 TAF15       | -0,46794926  |
| GSE40272 | X8275  | 23770 FKBP8      | -0,467925476 |
| GSE40272 | X4560  | 64419 MTMR14     | -0,467162791 |
| GSE40272 | X38844 | 23353 SUN1       | -0,466908034 |
| GSE40272 | X36084 | 26061 HACL1      | -0,466709302 |
| GSE40272 | X20816 | 310 ANXA7        | -0,466553911 |
| GSE40272 | X31122 | 53349 ZFYVE1     | -0,466184461 |
| GSE40272 | X10712 | 4134 MAP4        | -0,465709302 |
| GSE40272 | X33331 | 811 CALR         | -0,465607822 |
| GSE40272 | X3325  | 1509 CTSD        | -0,465566068 |
| GSE40272 | X6547  | 79026 AHNK       | -0,465516385 |
| GSE40272 | X19021 | 27430 MAT2B      | -0,465062896 |
| GSE40272 | X15951 | 1509 CTSD        | -0,464794397 |
| GSE40272 | X8862  | 760 CA2          | -0,464516913 |
| GSE40272 | X34845 | 6820 SULT2B1     | -0,462187104 |
| GSE40272 | X24077 | 115817 DHRS1     | -0,460589323 |
| GSE40272 | X22973 | 11215 AKAP11     | -0,459643235 |
| GSE40272 | X43952 | 80700 UBXN6      | -0,459510042 |
| GSE40272 | X36094 | 1500 CTNND1      | -0,459506342 |
| GSE40272 | X3320  | 5802 PTPRS       | -0,459315011 |
| GSE40272 | X37368 | 84818 IL17RC     | -0,459064482 |
| GSE40272 | X26515 | 158301 LOC158301 | -0,458307611 |
| GSE40272 | X13727 | 338427 SNORD108  | -0,457995243 |
| GSE40272 | X41963 | 9394 HS6ST1      | -0,457866808 |
| GSE40272 | X12527 | 4294 MAP3K10     | -0,457593552 |
| GSE40272 | X16487 | 6712 SPTBN2      | -0,457371036 |
| GSE40272 | X38893 | 8668 EIF3I       | -0,457240486 |
| GSE40272 | X40868 | 84232 MAF1       | -0,457239429 |
| GSE40272 | X8386  | 9409 PEX16       | -0,45660148  |
| GSE40272 | X769   | 22839 DLGAP4     | -0,456487315 |
| GSE40272 | X1446  | 2776 GNAQ        | -0,454965116 |

# Supplementary\_table\_S3

|          |        |                  |              |
|----------|--------|------------------|--------------|
| GSE40272 | X4652  | 51398 C19orf56   | -0,454035412 |
| GSE40272 | X5730  | 3184 HNRNPD      | -0,453701374 |
| GSE40272 | X26651 | 79148 MMP28      | -0,453420719 |
| GSE40272 | X11189 | 4082 MARCKS      | -0,453218816 |
| GSE40272 | X33542 | 10658 CELF1      | -0,452821353 |
| GSE40272 | X13509 | 441620 LOC441620 | -0,452165962 |
| GSE40272 | X2612  | 1186 CLCN7       | -0,452145349 |
| GSE40272 | X15012 | 10280 SIGMAR1    | -0,451745243 |
| GSE40272 | X8883  | 103 ADAR         | -0,451357294 |
| GSE40272 | X16620 | 142940 TRUB1     | -0,451198203 |
| GSE40272 | X39703 | 131909 FAM172BP  | -0,450336152 |
| GSE40272 | X37974 | 11277 TREX1      | -0,448690803 |
| GSE40272 | X38601 | 7332 UBE2L3      | -0,448383192 |
| GSE40272 | X23788 | 1936 EEF1D       | -0,446674947 |
| GSE40272 | X38867 | 1967 EIF2B1      | -0,446548626 |
| GSE40272 | X1776  | 178 AGL          | -0,446309197 |
| GSE40272 | X20441 | 391809 LOC391809 | -0,446137949 |
| GSE40272 | X7509  | 441236 LOC441236 | -0,44457241  |
| GSE40272 | X13973 | 85014 TMEM141    | -0,444448732 |
| GSE40272 | X1684  | 317762 CCDC85C   | -0,444349366 |
| GSE40272 | X33594 | 125058 TBC1D16   | -0,444267442 |
| GSE40272 | X13339 | 79095 C9orf16    | -0,444075053 |
| GSE40272 | X32204 | 51077 FCF1       | -0,443400634 |
| GSE40272 | X19812 | 26012 NELF       | -0,442102008 |
| GSE40272 | X361   | 440434 LOC440434 | -0,441770085 |
| GSE40272 | X15006 | 389 RHOC         | -0,441335624 |
| GSE40272 | X35502 | 2120 ETV6        | -0,440936047 |
| GSE40272 | X37280 | 2975 GTF3C1      | -0,440561839 |
| GSE40272 | X6828  | 56904 SH3GLB2    | -0,439739429 |
| GSE40272 | X15933 | 1456 CSNK1G3     | -0,439608351 |
| GSE40272 | X5860  | 4952 OCRL        | -0,437378964 |
| GSE40272 | X38201 | 10868 USP20      | -0,43670296  |
| GSE40272 | X4807  | 4154 MBNL1       | -0,436508985 |
| GSE40272 | X1470  | 60 ACTB          | -0,436441332 |
| GSE40272 | X29928 | 9685 CLINT1      | -0,436087738 |
| GSE40272 | X41611 | 147740 CPLP      | -0,434853066 |
| GSE40272 | X31851 | 3006 HIST1H1C    | -0,434633192 |
| GSE40272 | X33385 | 11140 CDC37      | -0,433739958 |
| GSE40272 | X17691 | 116985 ARAP1     | -0,433645349 |
| GSE40272 | X19945 | 5252 PHF1        | -0,432611522 |
| GSE40272 | X27650 | 23196 FAM120A    | -0,432463531 |
| GSE40272 | X38339 | 4952 OCRL        | -0,431722516 |
| GSE40272 | X39939 | 91368 CDKN2AIPNL | -0,43157611  |
| GSE40272 | X6427  | 196513 DCP1B     | -0,431394292 |
| GSE40272 | X11839 | 6711 SPTBN1      | -0,431027484 |
| GSE40272 | X20684 | 9043 SPAG9       | -0,43093129  |
| GSE40272 | X13755 | 441597 LOC441597 | -0,430819767 |
| GSE40272 | X9107  | 23513 SCRIB      | -0,430436047 |
| GSE40272 | X41099 | 6711 SPTBN1      | -0,430192389 |
| GSE40272 | X13690 | 4134 MAP4        | -0,429102008 |
| GSE40272 | X37936 | 25873 RPL36      | -0,427951374 |
| GSE40272 | X32260 | 7343 UBTF        | -0,427543869 |
| GSE40272 | X43655 | 84284 NTPCR      | -0,427502643 |

# Supplementary\_table\_S3

|          |        |                  |              |
|----------|--------|------------------|--------------|
| GSE40272 | X42501 | 1636 ACE         | -0,427262685 |
| GSE40272 | X20518 | 84193 SETD3      | -0,426628964 |
| GSE40272 | X6077  | 11054 OGFR       | -0,426268499 |
| GSE40272 | X2483  | 23001 WDFY3      | -0,426218288 |
| GSE40272 | X40973 | 4826 NNAT        | -0,424858351 |
| GSE40272 | X32120 | 1173 AP2M1       | -0,424496829 |
| GSE40272 | X8904  | 441619 LOC441619 | -0,424379493 |
| GSE40272 | X26828 | 10809 STARD10    | -0,423102537 |
| GSE40272 | X6156  | 10762 NUP50      | -0,422932347 |
| GSE40272 | X20880 | 5297 PI4KA       | -0,42214482  |
| GSE40272 | X16469 | 23143 LRCH1      | -0,422077696 |
| GSE40272 | X34837 | 23476 BRD4       | -0,42147093  |
| GSE40272 | X32455 | 57532 NUFIP2     | -0,420821882 |
| GSE40272 | X8644  | 4952 OCRL        | -0,420307611 |
| GSE40272 | X24630 | 10558 SPTLC1     | -0,41982241  |
| GSE40272 | X24680 | 6458 SH3GL1P1    | -0,418871036 |
| GSE40272 | X4671  | 389863 LOC389863 | -0,418006871 |
| GSE40272 | X878   | 22820 COPG       | -0,415945032 |
| GSE40272 | X17051 | 79735 TBC1D17    | -0,415715645 |
| GSE40272 | X42562 | 2990 GUSB        | -0,41459778  |
| GSE40272 | X26189 | 1975 EIF4B       | -0,41330444  |
| GSE40272 | X4702  | 10521 DDX17      | -0,413068182 |
| GSE40272 | X7484  | 51657 STYXL1     | -0,411131078 |
| GSE40272 | X19888 | 310 ANXA7        | -0,410603594 |
| GSE40272 | X32220 | 57605 PITPNM2    | -0,410309197 |
| GSE40272 | X8915  | 26173 INTS1      | -0,410285412 |
| GSE40272 | X24064 | 84266 ALKBH7     | -0,409052326 |
| GSE40272 | X38101 | 3029 HAGH        | -0,407218816 |
| GSE40272 | X587   | 388739 ZC3H11B   | -0,405450317 |
| GSE40272 | X43562 | 170394 PWWP2B    | -0,405266385 |
| GSE40272 | X30946 | 84163 GTF2IRD2   | -0,404126321 |
| GSE40272 | X23688 | 682 BSG          | -0,402299683 |
| GSE40272 | X25065 | 904 CCNT1        | -0,402266913 |
| GSE40272 | X5379  | 8733 GPAA1       | -0,401872622 |
| GSE40272 | X9980  | 85403 EAF1       | -0,401536469 |
| GSE40272 | X31214 | 27341 RRP7A      | -0,401374207 |
| GSE40272 | X1286  | 23499 MACF1      | -0,40115592  |
| GSE40272 | X38631 | 9665 KIAA0430    | -0,40014852  |
| GSE40272 | X37942 | 4771 NF2         | -0,397579281 |
| GSE40272 | X28255 | 253260 RICTOR    | -0,395801797 |
| GSE40272 | X38395 | 139431 FTH1P14   | -0,394008457 |
| GSE40272 | X30068 | 2969 GTF2I       | -0,391912262 |
| GSE40272 | X4964  | 23648 SSBP3      | -0,391618393 |
| GSE40272 | X28104 | 5594 MAPK1       | -0,390139006 |
| GSE40272 | X2174  | 738 C11orf2      | -0,389595666 |
| GSE40272 | X22901 | 23499 MACF1      | -0,389508457 |
| GSE40272 | X38813 | 390533 LOC390533 | -0,388414376 |
| GSE40272 | X38873 | 57488 ESYT2      | -0,387971459 |
| GSE40272 | X38204 | 10618 TGOLN2     | -0,387419133 |
| GSE40272 | X7045  | 284064 RPL29P31  | -0,385052854 |
| GSE40272 | X25209 | 4784 NFIX        | -0,384183404 |
| GSE40272 | X20876 | 57698 KIAA1598   | -0,383764271 |
| GSE40272 | X42122 | 8918 HERC2P6     | -0,38309408  |

# Supplementary\_table\_S3

|          |              |                       |              |
|----------|--------------|-----------------------|--------------|
| GSE40272 | X43720       | 23558 WBP2            | -0,382418076 |
| GSE40272 | X4237        | 5566 PRKACA           | -0,382250529 |
| GSE40272 | X14888       | 55765 C1orf106        | -0,38173203  |
| GSE40272 | X31384       | 10160 FARP1           | -0,380901163 |
| GSE40272 | X27557       | 7178 TPT1             | -0,380243658 |
| GSE40272 | X16993       | 4952 OCRL             | -0,379622093 |
| GSE40272 | X20121       | 25792 CIZ1            | -0,378943446 |
| GSE40272 | X14008       | 6142 RPL18A           | -0,376967759 |
| GSE40272 | X28185       | 79171 RBM42           | -0,374647463 |
| GSE40272 | X35506       | 387522 TMEM189-UBE2V1 | -0,373588795 |
| GSE40272 | X26744       | 374291 NDUFS7         | -0,372687632 |
| GSE40272 | X1773        | 2872 MKNK2            | -0,37171723  |
| GSE40272 | X28482       | 1452 CSNK1A1          | -0,371090381 |
| GSE40272 | X7500        | 4713 NDUFB7           | -0,370407505 |
| GSE40272 | X27393       | 8079 MLF2             | -0,369747357 |
| GSE40272 | X11193       | 4782 NFIC             | -0,369507928 |
| GSE40272 | X28384       | 5430 POLR2A           | -0,369498943 |
| GSE40272 | X31439       | 55611 OTUB1           | -0,367524841 |
| GSE40272 | X27922       | 339077 LOC339077      | -0,366088795 |
| GSE40272 | X25208       | 6598 SMARCB1          | -0,365944503 |
| GSE40272 | X4259        | 54998 AURKAIP1        | -0,364943975 |
| GSE40272 | X17562       | 513 ATP5D             | -0,364146406 |
| GSE40272 | X31587       | 4782 NFIC             | -0,359035412 |
| GSE40272 | X988         | 54882 ANKHD1          | -0,356963531 |
| GSE40272 | X10308       | 6430 SRSF5            | -0,353471459 |
| GSE40272 | X22776       | 23499 MACF1           | -0,351967759 |
| GSE40272 | X37577       | 831 CAST              | -0,351505814 |
| GSE40272 | X38026       | 26220 DGCR5           | -0,351504757 |
| GSE40272 | X30771       | 79090 TRAPPC6A        | -0,347726216 |
| GSE40272 | X40546       | 527 ATP6V0C           | -0,346060254 |
| GSE40272 | X42110       | 2767 GNA11            | -0,34509778  |
| GSE40272 | X5497        | 54461 FBXW5           | -0,344050211 |
| GSE40272 | X33548       | 6830 SUPT6H           | -0,343803911 |
| GSE40272 | X13194       | 8815 BANF1            | -0,343396934 |
| GSE40272 | X18702       | 51282 SCAND1          | -0,338220402 |
| GSE40272 | X23418       | 9817 KEAP1            | -0,337983615 |
| GSE40272 | X34373       | 92714 ARRDC1          | -0,335906977 |
| GSE40272 | X32140       | 147687 ZNF417         | -0,331207188 |
| GSE40272 | X27064       | 28974 C19orf53        | -0,3277426   |
| GSE70768 | ILMN_1722713 | 2192 FBLN1            | -0,705905423 |
| GSE70768 | ILMN_1664464 | 5730 PTGDS            | -0,699680137 |
| GSE70768 | ILMN_1677636 | 1311 COMP             | -0,694612953 |
| GSE70768 | ILMN_1700541 | 2192 FBLN1            | -0,685261012 |
| GSE70768 | ILMN_3230608 | 728841 NBPFF8         | -0,645852254 |
| GSE70768 | ILMN_1745607 | 2 A2M                 | -0,638612926 |
| GSE70768 | ILMN_1670305 | 710 SERPING1          | -0,630403793 |
| GSE70768 | ILMN_1774287 | 629 CFB               | -0,624864363 |
| GSE70768 | ILMN_1669362 | 3489 IGFBP6           | -0,624562152 |
| GSE70768 | ILMN_1740938 | 348 APOE              | -0,615886873 |
| GSE70768 | ILMN_1783909 | 1292 COL6A2           | -0,610793516 |
| GSE70768 | ILMN_2115490 | 400818 NBPFF20        | -0,610342342 |
| GSE70768 | ILMN_1788874 | 12 SERPINA3           | -0,603101172 |
| GSE70768 | ILMN_2359945 | 1066 CES1             | -0,599701522 |

# Supplementary\_table\_S3

|          |              |                  |              |
|----------|--------------|------------------|--------------|
| GSE70768 | ILMN_2380237 | 114897 C1QTNF1   | -0,583260843 |
| GSE70768 | ILMN_1665219 | 8425 LTBP4       | -0,568794478 |
| GSE70768 | ILMN_1723684 | 2532 DARC        | -0,55876952  |
| GSE70768 | ILMN_1717990 | 800 CALD1        | -0,549076459 |
| GSE70768 | ILMN_2193325 | 8510 MMP23B      | -0,546128207 |
| GSE70768 | ILMN_2379644 | 972 CD74         | -0,546110962 |
| GSE70768 | ILMN_2206746 | 633 BGN          | -0,545679023 |
| GSE70768 | ILMN_1747593 | 3671 ISLR        | -0,534617367 |
| GSE70768 | ILMN_1715748 | 2318 FLNC        | -0,533465552 |
| GSE70768 | ILMN_1677198 | 715 C1R          | -0,529459715 |
| GSE70768 | ILMN_1773389 | 5360 PLTP        | -0,527582737 |
| GSE70768 | ILMN_1736567 | 972 CD74         | -0,516908787 |
| GSE70768 | ILMN_1679401 | 54795 TRPM4      | -0,516115709 |
| GSE70768 | ILMN_1738116 | 338773 TMEM119   | -0,511129186 |
| GSE70768 | ILMN_1795484 | 5225 PGC         | -0,510713228 |
| GSE70768 | ILMN_1714861 | 968 CD68         | -0,510511785 |
| GSE70768 | ILMN_1736178 | 165 AEBP1        | -0,505332645 |
| GSE70768 | ILMN_3228294 | 729279 LOC729279 | -0,500382911 |
| GSE70768 | ILMN_1690034 | 6649 SOD3        | -0,490840603 |
| GSE70768 | ILMN_1780170 | 347 APOD         | -0,489945972 |
| GSE70768 | ILMN_1769129 | 6363 CCL19       | -0,488278383 |
| GSE70768 | ILMN_1781149 | 11185 INMT       | -0,485005573 |
| GSE70768 | ILMN_1660306 | 8516 ITGA8       | -0,483506617 |
| GSE70768 | ILMN_2115125 | 1490 CTGF        | -0,483299792 |
| GSE70768 | ILMN_1789733 | 25999 CLIP3      | -0,482536783 |
| GSE70768 | ILMN_1721283 | 126393 HSPB6     | -0,474982736 |
| GSE70768 | ILMN_1742450 | 6892 TAPBP       | -0,473676367 |
| GSE70768 | ILMN_1688780 | 6275 S100A4      | -0,472128063 |
| GSE70768 | ILMN_2098126 | 6352 CCL5        | -0,471751036 |
| GSE70768 | ILMN_1704286 | 53827 FXVD5      | -0,470056184 |
| GSE70768 | ILMN_1704985 | 1593 CYP27A1     | -0,467829778 |
| GSE70768 | ILMN_1684306 | 6275 S100A4      | -0,46773109  |
| GSE70768 | ILMN_3192001 | 6358 CCL14       | -0,467200783 |
| GSE70768 | ILMN_1743620 | 5918 RARRES1     | -0,465577791 |
| GSE70768 | ILMN_2309848 | 53827 FXVD5      | -0,465388954 |
| GSE70768 | ILMN_1701613 | 5920 RARRES3     | -0,463195763 |
| GSE70768 | ILMN_2376205 | 4050 LTB         | -0,458594389 |
| GSE70768 | ILMN_1745623 | 283229 EFCAB4A   | -0,458036918 |
| GSE70768 | ILMN_3302499 | 730990 LOC730990 | -0,45391822  |
| GSE70768 | ILMN_3225102 | 148203 ZNF738    | -0,450017275 |
| GSE70768 | ILMN_1687335 | 2316 FLNA        | -0,449792461 |
| GSE70768 | ILMN_1813561 | 85477 SCIN       | -0,445612691 |
| GSE70768 | ILMN_1756071 | 4240 MFGE8       | -0,443346008 |
| GSE70768 | ILMN_2066060 | 3128 HLA-DRB6    | -0,440567472 |
| GSE70768 | ILMN_1669599 | 55667 DENND4C    | -0,439117067 |
| GSE70768 | ILMN_1772359 | 7805 LAPTM5      | -0,437963047 |
| GSE70768 | ILMN_1763891 | 284297 FLJ35258  | -0,43641478  |
| GSE70768 | ILMN_2180239 | 9980 DOPEY2      | -0,435580086 |
| GSE70768 | ILMN_2387471 | 80164 FLJ22184   | -0,435005369 |
| GSE70768 | ILMN_2109708 | 1890 ECGF1       | -0,434467243 |
| GSE70768 | ILMN_1773352 | 6352 CCL5        | -0,434108355 |
| GSE70768 | ILMN_1790859 | 219348 PLAC9     | -0,433668215 |
| GSE70768 | ILMN_3213185 | 645452 LOC645452 | -0,431156572 |



Supplementary\_table\_S3

|          |              |                        |              |
|----------|--------------|------------------------|--------------|
| GSE70768 | ILMN_2155719 | 440673 NBPF10          | -0,431059797 |
| GSE70768 | ILMN_3181480 | 338999 FLJ36131        | -0,430286415 |
| GSE70768 | ILMN_3274790 | 648921 LOC648921       | -0,429794302 |
| GSE70768 | ILMN_1707070 | 5118 PCOLCE            | -0,42899706  |
| GSE70768 | ILMN_1774982 | 148170 CDC42EP5        | -0,42837969  |
| GSE70768 | ILMN_3231550 | 100131718 LOC100131718 | -0,426120553 |
| GSE70768 | ILMN_1674063 | 4939 OAS2              | -0,42450284  |
| GSE70768 | ILMN_3243238 | 64499 TPSB2            | -0,422499444 |
| GSE70768 | ILMN_2216265 | 83752 LONP2            | -0,42201193  |
| GSE70768 | ILMN_1786847 | 7053 TGM3              | -0,421106483 |
| GSE70768 | ILMN_1769779 | 11156 PTP4A3           | -0,420898713 |
| GSE70768 | ILMN_2066066 | 3128 HLA-DRB6          | -0,42029808  |
| GSE70768 | ILMN_1672536 | 2192 FBLN1             | -0,419754771 |
| GSE70768 | ILMN_2189222 | 57563 KLHL8            | -0,418834331 |
| GSE70768 | ILMN_1662340 | 140467 ZNF358          | -0,418812438 |
| GSE70768 | ILMN_1752592 | 3126 HLA-DRB4          | -0,417632351 |
| GSE70768 | ILMN_1676256 | 7177 TPSAB1            | -0,417554353 |
| GSE70768 | ILMN_2075794 | 126205 NLRP8           | -0,413863942 |
| GSE70768 | ILMN_1746919 | 643882 LOC643882       | -0,41247692  |
| GSE70768 | ILMN_2411282 | 5768 QSOX1             | -0,410671981 |
| GSE70768 | ILMN_3228688 | 730415 LOC730415       | -0,406604456 |
| GSE70768 | ILMN_2334296 | 10068 IL18BP           | -0,406494499 |
| GSE70768 | ILMN_3215461 | 100131989 LOC100131989 | -0,406148574 |
| GSE70768 | ILMN_1760778 | 2022 ENG               | -0,406064757 |
| GSE70768 | ILMN_2326712 | 25825 BACE2            | -0,405730453 |
| GSE70768 | ILMN_1740609 | 6359 CCL15             | -0,404934626 |
| GSE70768 | ILMN_1770290 | 1265 CNN2              | -0,40451607  |
| GSE70768 | ILMN_1661335 | 6711 SPTBN1            | -0,40406868  |
| GSE70768 | ILMN_1803810 | 6238 RRBP1             | -0,401136703 |
| GSE70768 | ILMN_1654396 | 3689 ITGB2             | -0,400887167 |
| GSE70768 | ILMN_2207505 | 3952 LEP               | -0,400211187 |
| GSE70768 | ILMN_1805377 | 7784 ZP3               | -0,400145815 |
| GSE70768 | ILMN_1801307 | 8743 TNFSF10           | -0,39955637  |
| GSE70768 | ILMN_1770800 | 127435 PODN            | -0,399200285 |
| GSE70768 | ILMN_1766914 | 4239 MFAP4             | -0,397891102 |
| GSE70768 | ILMN_3287996 | 400446 LOC400446       | -0,397144713 |
| GSE70768 | ILMN_1680948 | 25802 LMOD1            | -0,396820399 |
| GSE70768 | ILMN_3247256 | 646996 LOC646996       | -0,396808809 |
| GSE70768 | ILMN_1809928 | 1292 COL6A2            | -0,396467985 |
| GSE70768 | ILMN_1699829 | 1490 CTGF              | -0,396190222 |
| GSE70768 | ILMN_1663080 | 3955 LFNG              | -0,396087704 |
| GSE70768 | ILMN_1687384 | 2537 IFI6              | -0,394784306 |
| GSE70768 | ILMN_1673421 | 440704 LOC440704       | -0,394444548 |
| GSE70768 | ILMN_2404154 | 5265 SERPINA1          | -0,393959695 |
| GSE70768 | ILMN_2262044 | 84875 PARP10           | -0,393928951 |
| GSE70768 | ILMN_1774602 | 2199 FBLN2             | -0,393491536 |
| GSE70768 | ILMN_1764788 | 7133 TNFRSF1B          | -0,393203835 |
| GSE70768 | ILMN_1815895 | 649143 LOC649143       | -0,393202517 |
| GSE70768 | ILMN_1677200 | 26999 CYFIP2           | -0,39314924  |
| GSE70768 | ILMN_2089175 | 94056 SYAP1            | -0,392260567 |
| GSE70768 | ILMN_1801040 | 6693 SPN               | -0,392145271 |
| GSE70768 | ILMN_3243175 | 100132727 LOC100132727 | -0,391515005 |
| GSE70768 | ILMN_2359710 | 11156 PTP4A3           | -0,391453464 |

# Supplementary\_table\_S3

|          |              |                        |              |
|----------|--------------|------------------------|--------------|
| GSE70768 | ILMN_1761464 | 972 CD74               | -0,391277637 |
| GSE70768 | ILMN_1734742 | 396 ARHGDI             | -0,390903027 |
| GSE70768 | ILMN_1667748 | 341405 ANKRD33         | -0,390151188 |
| GSE70768 | ILMN_1680279 | 25862 USP49            | -0,389708937 |
| GSE70768 | ILMN_1673363 | 976 CD97               | -0,389684116 |
| GSE70768 | ILMN_2396272 | 27250 PDCD4            | -0,389628395 |
| GSE70768 | ILMN_1803855 | 23017 FAIM2            | -0,389579086 |
| GSE70768 | ILMN_2162367 | 11144 DMC1             | -0,388760755 |
| GSE70768 | ILMN_1711073 | 653489 LOC653489       | -0,388053174 |
| GSE70768 | ILMN_1768812 | 53826 FXVD6            | -0,387016654 |
| GSE70768 | ILMN_2389876 | 7041 TGFB11            | -0,38697817  |
| GSE70768 | ILMN_1686623 | 1436 CSF1R             | -0,386709796 |
| GSE70768 | ILMN_1675130 | 4782 NFIC              | -0,385680408 |
| GSE70768 | ILMN_1754220 | 8175 SF3A2             | -0,385508147 |
| GSE70768 | ILMN_2286014 | 117155 CATSPER2        | -0,385391413 |
| GSE70768 | ILMN_1651610 | 730525 LOC730525       | -0,383965633 |
| GSE70768 | ILMN_3294213 | 401098 LOC401098       | -0,383481751 |
| GSE70768 | ILMN_1760027 | 7454 WAS               | -0,383087519 |
| GSE70768 | ILMN_1665865 | 3487 IGFBP4            | -0,38294846  |
| GSE70768 | ILMN_1685433 | 1295 COL8A1            | -0,38214714  |
| GSE70768 | ILMN_1779875 | 7070 THY1              | -0,380830172 |
| GSE70768 | ILMN_1726666 | 2878 GPX3              | -0,380344984 |
| GSE70768 | ILMN_1790052 | 8511 MMP23A            | -0,37991266  |
| GSE70768 | ILMN_1764109 | 715 C1R                | -0,379783874 |
| GSE70768 | ILMN_1654072 | 6376 CX3CL1            | -0,379702701 |
| GSE70768 | ILMN_3239135 | 100132391 LOC100132391 | -0,379621281 |
| GSE70768 | ILMN_3294222 | 100132673 LOC100132673 | -0,379338626 |
| GSE70768 | ILMN_3176146 | 100128918 LOC100128918 | -0,378295934 |
| GSE70768 | ILMN_1788180 | 5872 RAB13             | -0,378080771 |
| GSE70768 | ILMN_3265143 | 100129502 LOC100129502 | -0,377384029 |
| GSE70768 | ILMN_1669323 | 25825 BACE2            | -0,376533104 |
| GSE70768 | ILMN_2113535 | 51449 PCYOX1           | -0,374575886 |
| GSE70768 | ILMN_2169801 | 7177 TPSAB1            | -0,373973043 |
| GSE70768 | ILMN_1703650 | 10318 TNIP1            | -0,373567509 |
| GSE70768 | ILMN_2186806 | 3134 HLA-F             | -0,372849865 |
| GSE70768 | ILMN_1772644 | 256364 EML3            | -0,372026405 |
| GSE70768 | ILMN_1789338 | 10174 SORBS3           | -0,371633736 |
| GSE70768 | ILMN_1709795 | 5880 RAC2              | -0,371536383 |
| GSE70768 | ILMN_2368530 | 9235 IL32              | -0,371073596 |
| GSE70768 | ILMN_1727532 | 56944 OLFML3           | -0,370325569 |
| GSE70768 | ILMN_1767446 | 57484 RNF150           | -0,369949903 |
| GSE70768 | ILMN_1796409 | 713 C1QB               | -0,369651754 |
| GSE70768 | ILMN_2224907 | 201895 C4orf34         | -0,369608004 |
| GSE70768 | ILMN_3294134 | 389765 LOC389765       | -0,369432688 |
| GSE70768 | ILMN_2367707 | 5585 PKN1              | -0,369274057 |
| GSE70768 | ILMN_1812105 | 8396 PIP5K2B           | -0,368874012 |
| GSE70768 | ILMN_2376458 | 1438 CSF2RA            | -0,368390671 |
| GSE70768 | ILMN_2249473 | 10558 SPTLC1           | -0,367797579 |
| GSE70768 | ILMN_2383107 | 27072 VPS41            | -0,367605546 |
| GSE70768 | ILMN_1687848 | 730 C7                 | -0,367216344 |
| GSE70768 | ILMN_1695311 | 3108 HLA-DMA           | -0,367046512 |
| GSE70768 | ILMN_1705750 | 7052 TGM2              | -0,36685622  |
| GSE70768 | ILMN_2359742 | 1508 CTSB              | -0,366818313 |

# Supplementary\_table\_S3

|          |              |                        |              |
|----------|--------------|------------------------|--------------|
| GSE70768 | ILMN_1808777 | 30846 EHD2             | -0,366249866 |
| GSE70768 | ILMN_1677691 | 648852 LOC648852       | -0,365700816 |
| GSE70768 | ILMN_1671295 | 83643 CCDC3            | -0,365540424 |
| GSE70768 | ILMN_1725534 | 81 ACTN4               | -0,364857018 |
| GSE70768 | ILMN_1717052 | 10809 STARD10          | -0,364744884 |
| GSE70768 | ILMN_1796316 | 4318 MMP9              | -0,364491335 |
| GSE70768 | ILMN_3249658 | 100134868 LOC100134868 | -0,364350357 |
| GSE70768 | ILMN_2107004 | 2825 GPR1              | -0,364092783 |
| GSE70768 | ILMN_1651832 | 10938 EHD1             | -0,364017769 |
| GSE70768 | ILMN_1752755 | 7450 VWF               | -0,363911746 |
| GSE70768 | ILMN_1664068 | 57222 ERGIC1           | -0,363451556 |
| GSE70768 | ILMN_1694731 | 1186 CLCN7             | -0,363338396 |
| GSE70768 | ILMN_2374352 | 79007 DBNDD1           | -0,362811776 |
| GSE70768 | ILMN_1772981 | 29924 EPN1             | -0,362717129 |
| GSE70768 | ILMN_1662358 | 4599 MX1               | -0,362322291 |
| GSE70768 | ILMN_1654320 | 644250 LOC644250       | -0,361823876 |
| GSE70768 | ILMN_1693789 | 250 ALPP               | -0,361456776 |
| GSE70768 | ILMN_1751851 | 51816 CECR1            | -0,36078365  |
| GSE70768 | ILMN_2085862 | 51296 SLC15A3          | -0,360710514 |
| GSE70768 | ILMN_2363392 | 8740 TNFSF14           | -0,36037865  |
| GSE70768 | ILMN_1800451 | 10025 MED16            | -0,360065274 |
| GSE70768 | ILMN_2175912 | 3689 ITGB2             | -0,35981408  |
| GSE70768 | ILMN_2048811 | 80224 NUBPL            | -0,35938372  |
| GSE70768 | ILMN_1781626 | 716 C1S                | -0,358916162 |
| GSE70768 | ILMN_2359907 | 968 CD68               | -0,358741876 |
| GSE70768 | ILMN_3249244 | 113277 TMEM106A        | -0,358193638 |
| GSE70768 | ILMN_1678841 | 10537 UBD              | -0,357668571 |
| GSE70768 | ILMN_2141482 | 5176 SERPINF1          | -0,357036634 |
| GSE70768 | ILMN_2053921 | 832 CAPZB              | -0,356975857 |
| GSE70768 | ILMN_1814039 | 653086 LOC653086       | -0,356202854 |
| GSE70768 | ILMN_1762204 | 148823 C1orf150        | -0,356160406 |
| GSE70768 | ILMN_3251723 | 87178 PNPT1            | -0,356070274 |
| GSE70768 | ILMN_1699931 | 10870 HCST             | -0,35606774  |
| GSE70768 | ILMN_2196078 | 114836 SLAMF6          | -0,354322538 |
| GSE70768 | ILMN_2392286 | 9807 IP6K1             | -0,353262845 |
| GSE70768 | ILMN_1728684 | 27043 PELP1            | -0,353001287 |
| GSE70768 | ILMN_3203444 | 100132535 LOC100132535 | -0,35260008  |
| GSE70768 | ILMN_1789639 | 2331 FMOD              | -0,352313283 |
| GSE70768 | ILMN_1703316 | 255783 LOC255783       | -0,351116245 |
| GSE70768 | ILMN_2222101 | 55728 N4BP2            | -0,350808619 |
| GSE70768 | ILMN_1778374 | 682 BSG                | -0,350333654 |
| GSE70768 | ILMN_2345292 | 5348 FXYP1             | -0,350136294 |
| GSE70768 | ILMN_1776519 | 5909 RAP1GAP           | -0,349720975 |
| GSE70768 | ILMN_3238053 | 100129211 LOC100129211 | -0,349567532 |
| GSE70768 | ILMN_2117809 | 503632 DUXAP3          | -0,34894065  |
| GSE70768 | ILMN_1790782 | 10025 MED16            | -0,34843072  |
| GSE70768 | ILMN_1715583 | 23246 BOP1             | -0,348132643 |
| GSE70768 | ILMN_3237404 | 100132585 LOC100132585 | -0,347472793 |
| GSE70768 | ILMN_2252309 | 29952 DPP7             | -0,347217293 |
| GSE70768 | ILMN_2130180 | 283345 RPL13L          | -0,34619323  |
| GSE70768 | ILMN_1701877 | 558 AXL                | -0,345612942 |
| GSE70768 | ILMN_2380938 | 9066 SYT7              | -0,345558099 |
| GSE70768 | ILMN_2405684 | 330 BIRC3              | -0,345242507 |

# Supplementary\_table\_S3

|          |              |                        |              |
|----------|--------------|------------------------|--------------|
| GSE70768 | ILMN_2402392 | 1295 COL8A1            | -0,344946313 |
| GSE70768 | ILMN_2390919 | 2199 FBLN2             | -0,34420311  |
| GSE70768 | ILMN_2407851 | 54756 IL17RD           | -0,342565055 |
| GSE70768 | ILMN_2054554 | 285605 DTWD2           | -0,342406791 |
| GSE70768 | ILMN_2183687 | 54923 LIME1            | -0,342245474 |
| GSE70768 | ILMN_1713829 | 9536 PTGES             | -0,342065974 |
| GSE70768 | ILMN_3281039 | 642909 LOC642909       | -0,3412454   |
| GSE70768 | ILMN_1731353 | 79586 CHPF             | -0,341056288 |
| GSE70768 | ILMN_1692956 | 643949 LOC643949       | -0,340816907 |
| GSE70768 | ILMN_1744604 | 1535 CYBA              | -0,340732051 |
| GSE70768 | ILMN_1767556 | 11067 C10orf10         | -0,340614679 |
| GSE70768 | ILMN_1680134 | 10498 CARM1            | -0,340395073 |
| GSE70768 | ILMN_1709439 | 5119 CHMP1A            | -0,339672662 |
| GSE70768 | ILMN_1675709 | 55738 ARFGAP1          | -0,339158946 |
| GSE70768 | ILMN_1801043 | 2934 GSN               | -0,337492283 |
| GSE70768 | ILMN_2299450 | 22953 P2RX2            | -0,337360886 |
| GSE70768 | ILMN_3239445 | 100128927 ZBTB42       | -0,337335677 |
| GSE70768 | ILMN_2313889 | 91120 ZNF682           | -0,33636043  |
| GSE70768 | ILMN_1673069 | 91039 DPP9             | -0,33571496  |
| GSE70768 | ILMN_1690114 | 401494 PTPLAD2         | -0,33567633  |
| GSE70768 | ILMN_3211132 | 645173 LOC645173       | -0,335522827 |
| GSE70768 | ILMN_1711439 | 11117 EMILIN1          | -0,334691499 |
| GSE70768 | ILMN_3200362 | 727908 LOC727908       | -0,334258627 |
| GSE70768 | ILMN_1713749 | 11151 CORO1A           | -0,334099033 |
| GSE70768 | ILMN_2327860 | 4118 MAL               | -0,333189679 |
| GSE70768 | ILMN_2055634 | 9220 TIAF1             | -0,333175486 |
| GSE70768 | ILMN_2122511 | 147372 CCBE1           | -0,332415058 |
| GSE70768 | ILMN_1721349 | 84061 MAGT1            | -0,332273599 |
| GSE70768 | ILMN_3242038 | 493869 GPX8            | -0,331699992 |
| GSE70768 | ILMN_1777794 | 5589 PRKCSH            | -0,331528915 |
| GSE70768 | ILMN_3223500 | 728903 LOC728903       | -0,331411179 |
| GSE70768 | ILMN_2415979 | 85452 KIAA1751         | -0,330779263 |
| GSE70768 | ILMN_2077094 | 738 C11orf2            | -0,330589541 |
| GSE70768 | ILMN_2371169 | 7791 ZYX               | -0,330561155 |
| GSE70768 | ILMN_2123559 | 374986 FAM73A          | -0,330218484 |
| GSE70768 | ILMN_1730670 | 10272 FSTL3            | -0,329823936 |
| GSE70768 | ILMN_2329735 | 1893 ECM1              | -0,329499649 |
| GSE70768 | ILMN_3261345 | 100130053 LOC100130053 | -0,329324525 |
| GSE70768 | ILMN_2342455 | 27068 PPA2             | -0,329302999 |
| GSE70768 | ILMN_1769508 | 54965 PIGX             | -0,329191674 |
| GSE70768 | ILMN_1684554 | 1307 COL16A1           | -0,32908048  |
| GSE70768 | ILMN_1785528 | 374666 FAM39DP         | -0,328717964 |
| GSE70768 | ILMN_3240838 | 293 SLC25A6            | -0,328672997 |
| GSE70768 | ILMN_1651788 | 4296 MAP3K11           | -0,32821412  |
| GSE70768 | ILMN_1656287 | 9806 SPOCK2            | -0,327862345 |
| GSE70768 | ILMN_2129161 | 2615 LRRC32            | -0,327654501 |
| GSE70768 | ILMN_3246255 | 100133516 LOC100133516 | -0,326584103 |
| GSE70768 | ILMN_1745374 | 3430 IFI35             | -0,326430693 |
| GSE70768 | ILMN_1739441 | 23193 GANAB            | -0,326123416 |
| GSE70768 | ILMN_1754103 | 5010 CLDN11            | -0,325811109 |
| GSE70768 | ILMN_2041222 | 284085 FLJ40504        | -0,325686115 |
| GSE70768 | ILMN_2059173 | 79939 SLC35E1          | -0,325665229 |
| GSE70768 | ILMN_1727402 | 3059 HCLS1             | -0,325470086 |

# Supplementary\_table\_S3

|          |              |                        |              |
|----------|--------------|------------------------|--------------|
| GSE70768 | ILMN_3239629 | 729679 LOC729679       | -0,32538949  |
| GSE70768 | ILMN_1669114 | 65266 WNK4             | -0,325373515 |
| GSE70768 | ILMN_2053538 | 54933 RHBDL2           | -0,325297399 |
| GSE70768 | ILMN_1655952 | 375690 FAM39E          | -0,324426147 |
| GSE70768 | ILMN_1806122 | 57680 CHD8             | -0,324259105 |
| GSE70768 | ILMN_1653203 | 30008 EFEMP2           | -0,323845722 |
| GSE70768 | ILMN_1701655 | 80024 SLC24A6          | -0,322515648 |
| GSE70768 | ILMN_2381537 | 27297 CRCP             | -0,322095341 |
| GSE70768 | ILMN_3239361 | 100133298 LOC100133298 | -0,321975218 |
| GSE70769 | ILMN_1660086 | 4629 MYH11             | -1,005844456 |
| GSE70769 | ILMN_1766914 | 4239 MFAP4             | -0,780085388 |
| GSE70769 | ILMN_2368834 | 4629 MYH11             | -0,768319741 |
| GSE70769 | ILMN_1713995 | 6337 SCNN1A            | -0,756332207 |
| GSE70769 | ILMN_1717990 | 800 CALD1              | -0,743563999 |
| GSE70769 | ILMN_1792363 | 9622 KLK4              | -0,738149104 |
| GSE70769 | ILMN_1665219 | 8425 LTBP4             | -0,692025407 |
| GSE70769 | ILMN_1721876 | 7077 TIMP2             | -0,649155663 |
| GSE70769 | ILMN_1688642 | 10319 LAMC3            | -0,604777275 |
| GSE70769 | ILMN_1808587 | 463 ZFHX3              | -0,60195566  |
| GSE70769 | ILMN_1789733 | 25999 CLIP3            | -0,599353997 |
| GSE70769 | ILMN_2099301 | 25777 UNC84B           | -0,595504409 |
| GSE70769 | ILMN_1670305 | 710 SERPING1           | -0,586634012 |
| GSE70769 | ILMN_1715748 | 2318 FLNC              | -0,582499261 |
| GSE70769 | ILMN_3241234 | 730278 LOC730278       | -0,570383555 |
| GSE70769 | ILMN_1795300 | 389337 FLJ41603        | -0,557746474 |
| GSE70769 | ILMN_1776953 | 10398 MYL9             | -0,556873169 |
| GSE70769 | ILMN_1674236 | 3315 HSPB1             | -0,555831781 |
| GSE70769 | ILMN_1772981 | 29924 EPN1             | -0,55330607  |
| GSE70769 | ILMN_1732060 | 392 ARHGAP1            | -0,541806343 |
| GSE70769 | ILMN_1777794 | 5589 PRKCSH            | -0,539807203 |
| GSE70769 | ILMN_1808238 | 348093 RBPMS2          | -0,534384294 |
| GSE70769 | ILMN_1674533 | 55503 TRPV6            | -0,529873918 |
| GSE70769 | ILMN_1721283 | 126393 HSPB6           | -0,523386589 |
| GSE70769 | ILMN_1752968 | 3913 LAMB2             | -0,521408951 |
| GSE70769 | ILMN_1719543 | 4094 MAF               | -0,514533262 |
| GSE70769 | ILMN_1768510 | 23324 MAN2B2           | -0,507559274 |
| GSE70769 | ILMN_1701875 | 7791 ZYX               | -0,507340974 |
| GSE70769 | ILMN_1675062 | 10398 MYL9             | -0,500331762 |
| GSE70769 | ILMN_2352097 | 9289 GPR56             | -0,494878672 |
| GSE70769 | ILMN_1773567 | 3911 LAMA5             | -0,492358769 |
| GSE70769 | ILMN_2308582 | 1727 CYB5R3            | -0,480851398 |
| GSE70769 | ILMN_1811702 | 2896 GRN               | -0,480678731 |
| GSE70769 | ILMN_1751851 | 51816 CECR1            | -0,478052362 |
| GSE70769 | ILMN_1770290 | 1265 CNN2              | -0,473767397 |
| GSE70769 | ILMN_2347097 | 55554 KLK15            | -0,471588299 |
| GSE70769 | ILMN_1729482 | 55554 KLK15            | -0,46917006  |
| GSE70769 | ILMN_1738401 | 2296 FOXC1             | -0,467002368 |
| GSE70769 | ILMN_1781983 | 162 AP1B1              | -0,465625903 |
| GSE70769 | ILMN_1748281 | 5602 MAPK10            | -0,464674504 |
| GSE70769 | ILMN_1763228 | 4209 MEF2D             | -0,461865306 |
| GSE70769 | ILMN_3246900 | 92249 LOC92249         | -0,460165728 |
| GSE70769 | ILMN_1702501 | 6196 RPS6KA2           | -0,456215507 |
| GSE70769 | ILMN_1786197 | 7025 NR2F1             | -0,456204268 |

# Supplementary\_table\_S3

|          |              |                  |              |
|----------|--------------|------------------|--------------|
| GSE70769 | ILMN_1651315 | 10362 HMG20B     | -0,450258424 |
| GSE70769 | ILMN_1722634 | 4924 NUCB1       | -0,433319659 |
| GSE70769 | ILMN_1696911 | 2501 FTHL8       | -0,432941086 |
| GSE70769 | ILMN_1672504 | 8566 PDXK        | -0,429529548 |
| GSE70769 | ILMN_1750101 | 6282 S100A11     | -0,428850591 |
| GSE70769 | ILMN_1783566 | 79748 LMAN1L     | -0,42610063  |
| GSE70769 | ILMN_1679919 | 84164 ASCC2      | -0,422542472 |
| GSE70769 | ILMN_1679797 | 104 ADARB1       | -0,418748754 |
| GSE70769 | ILMN_2130635 | 80020 FOXRED2    | -0,417808595 |
| GSE70769 | ILMN_1751097 | 64764 CREB3L2    | -0,417668651 |
| GSE70769 | ILMN_1757552 | 284119 PTRF      | -0,417010668 |
| GSE70769 | ILMN_1731353 | 79586 CHPF       | -0,412658794 |
| GSE70769 | ILMN_1729234 | 1200 TPP1        | -0,412393896 |
| GSE70769 | ILMN_2308849 | 91663 MYADM      | -0,409859017 |
| GSE70769 | ILMN_1779171 | 9905 SGSM2       | -0,409366486 |
| GSE70769 | ILMN_1719986 | 113791 PIK3IP1   | -0,409298573 |
| GSE70769 | ILMN_1666976 | 23646 PLD3       | -0,409013872 |
| GSE70769 | ILMN_1689456 | 26137 ZBTB20     | -0,402931956 |
| GSE70769 | ILMN_1725534 | 81 ACTN4         | -0,399668272 |
| GSE70769 | ILMN_1737833 | 1822 ATN1        | -0,398769667 |
| GSE70769 | ILMN_1666376 | 81844 TRIM56     | -0,39701323  |
| GSE70769 | ILMN_1660341 | 4043 LRPAP1      | -0,392264327 |
| GSE70769 | ILMN_1724250 | 2896 GRN         | -0,391943019 |
| GSE70769 | ILMN_1759023 | 7466 WFS1        | -0,390389239 |
| GSE70769 | ILMN_1803219 | 147798 TMC4      | -0,389218565 |
| GSE70769 | ILMN_1662198 | 5905 RANGAP1     | -0,387188265 |
| GSE70769 | ILMN_1782292 | 3916 LAMP1       | -0,386764549 |
| GSE70769 | ILMN_1740441 | 1727 CYB5R3      | -0,385049631 |
| GSE70769 | ILMN_1743763 | 93643 TJAP1      | -0,383463887 |
| GSE70769 | ILMN_2380237 | 114897 C1QTNF1   | -0,379927908 |
| GSE70769 | ILMN_1694731 | 1186 CLCN7       | -0,378272632 |
| GSE70769 | ILMN_1659206 | 5914 RARA        | -0,377876277 |
| GSE70769 | ILMN_1727574 | 152485 ZNF827    | -0,37688534  |
| GSE70769 | ILMN_1652797 | 400451 FAM174B   | -0,375829325 |
| GSE70769 | ILMN_1655952 | 375690 FAM39E    | -0,374627748 |
| GSE70769 | ILMN_1687921 | 339123 JMJD8     | -0,374204529 |
| GSE70769 | ILMN_1708143 | 8933 FAM127A     | -0,373933065 |
| GSE70769 | ILMN_1806030 | 5493 PPL         | -0,372738539 |
| GSE70769 | ILMN_2359742 | 1508 CTSB        | -0,372087651 |
| GSE70769 | ILMN_2400874 | 57410 SCYL1      | -0,370452963 |
| GSE70769 | ILMN_1668514 | 23396 PIP5K1C    | -0,369693553 |
| GSE70769 | ILMN_1779185 | 23384 CYTSA      | -0,36919643  |
| GSE70769 | ILMN_1704793 | 339344 MYPOP     | -0,368801032 |
| GSE70769 | ILMN_1800425 | 6548 SLC9A1      | -0,368386481 |
| GSE70769 | ILMN_2389876 | 7041 TGFB111     | -0,368308537 |
| GSE70769 | ILMN_3249366 | 339123 JMJD8     | -0,368229394 |
| GSE70769 | ILMN_1696027 | 642333 LOC642333 | -0,366292656 |
| GSE70769 | ILMN_1749478 | 85012 TCEAL3     | -0,364782934 |
| GSE70769 | ILMN_1682567 | 29903 CCDC106    | -0,363563139 |
| GSE70769 | ILMN_1800354 | 1471 CST3        | -0,362898144 |
| GSE70769 | ILMN_1667748 | 341405 ANKRD33   | -0,358124163 |
| GSE70769 | ILMN_1667883 | 8563 THOC5       | -0,357762955 |
| GSE70769 | ILMN_2371169 | 7791 ZYX         | -0,357264715 |

# Supplementary\_table\_S3

|          |              |                  |              |
|----------|--------------|------------------|--------------|
| GSE70769 | ILMN_1763447 | 23654 PLXNB2     | -0,356599769 |
| GSE70769 | ILMN_1763198 | 6778 STAT6       | -0,355708545 |
| GSE70769 | ILMN_1676665 | 404093 CUEDC1    | -0,355538532 |
| GSE70769 | ILMN_1709032 | 79443 FYCO1      | -0,3552015   |
| GSE70769 | ILMN_1775330 | 388115 C15orf52  | -0,353529355 |
| GSE70769 | ILMN_1712095 | 4303 FOXO4       | -0,352711546 |
| GSE70769 | ILMN_1784005 | 644615 LOC644615 | -0,35205942  |
| GSE70769 | ILMN_1696643 | 7094 TLN1        | -0,347220812 |
| GSE70769 | ILMN_1735788 | 11078 TRIOBP     | -0,346370023 |
| GSE70769 | ILMN_1684554 | 1307 COL16A1     | -0,344768303 |
| GSE70769 | ILMN_1726589 | 57124 CD248      | -0,344667553 |
| GSE70769 | ILMN_2373982 | 9463 PICK1       | -0,343700471 |
| GSE70769 | ILMN_1711994 | 10312 TCIRG1     | -0,341336013 |
| GSE70769 | ILMN_1786024 | 171568 POLR3H    | -0,337796947 |
| GSE70769 | ILMN_1764228 | 1601 DAB2        | -0,337594303 |
| GSE70769 | ILMN_1726456 | 6520 SLC3A2      | -0,337425157 |
| GSE70769 | ILMN_1733248 | 340371 NRBP2     | -0,331758903 |
| GSE70769 | ILMN_1739450 | 4779 NFE2L1      | -0,329626248 |
| GSE70769 | ILMN_1655990 | 55755 CDK5RAP2   | -0,328313968 |
| GSE70769 | ILMN_1761463 | 79180 EFHD2      | -0,327620687 |
| GSE70769 | ILMN_2350574 | 91663 MYADM      | -0,327604936 |
| GSE70769 | ILMN_2097793 | 57659 ZBTB4      | -0,325940951 |
| GSE70769 | ILMN_1690653 | 10263 CDK2AP2    | -0,325380161 |
| GSE70769 | ILMN_1803559 | 642477 FLJ39632  | -0,325026482 |
| GSE70769 | ILMN_1674038 | 1509 CTSD        | -0,322678358 |

# Supplementary\_table\_S3

| raw p value | pFDR        |
|-------------|-------------|
| 6,55E-04    | 0,025034302 |
| 2,79E-04    | 0,017124331 |
| 1,09E-04    | 0,010012856 |
| 0,00110878  | 0,034655925 |
| 6,41E-04    | 0,024927587 |
| 1,21E-05    | 0,002978487 |
| 2,12E-04    | 0,015539329 |
| 1,14E-04    | 0,010261049 |
| 0,001645283 | 0,044728393 |
| 4,57E-05    | 0,006375751 |
| 0,001696059 | 0,045306908 |
| 6,75E-05    | 0,007976403 |
| 5,96E-04    | 0,024242052 |
| 0,002039133 | 0,049716011 |
| 0,001955136 | 0,049030025 |
| 3,73E-04    | 0,019484281 |
| 7,40E-04    | 0,026489678 |
| 0,001676611 | 0,045180259 |
| 3,93E-04    | 0,019930822 |
| 8,80E-05    | 0,008861597 |
| 2,52E-05    | 0,004191273 |
| 0,001041682 | 0,033684696 |
| 7,84E-04    | 0,027529344 |
| 0,002066492 | 0,049835973 |
| 0,001834122 | 0,046758707 |
| 9,43E-05    | 0,009056788 |
| 4,11E-04    | 0,020260029 |
| 7,10E-04    | 0,026145281 |
| 7,11E-04    | 0,026145281 |
| 1,50E-05    | 0,001231244 |
| 2,15E-04    | 0,006520489 |
| 1,88E-05    | 0,00142228  |
| 3,14E-05    | 0,001939867 |
| 8,37E-04    | 0,015493983 |
| 1,43E-04    | 0,005056423 |
| 7,32E-04    | 0,014224695 |
| 0,004318149 | 0,044057139 |
| 0,001575175 | 0,023179586 |
| 0,002108681 | 0,027855599 |
| 0,00518137  | 0,049326557 |
| 0,003203311 | 0,036586739 |
| 0,002653811 | 0,032466731 |
| 3,85E-07    | 1,57E-04    |
| 0,002010906 | 0,026907114 |
| 0,002134374 | 0,028111635 |
| 5,71E-04    | 0,012176757 |
| 0,001238766 | 0,020036162 |
| 0,001163808 | 0,019303069 |
| 1,91E-04    | 0,006022449 |
| 0,004520108 | 0,045144306 |
| 0,001506015 | 0,022568821 |



# Supplementary\_table\_S3

|             |             |
|-------------|-------------|
| 2,70E-04    | 0,007600483 |
| 0,001596097 | 0,023356286 |
| 2,96E-07    | 1,27E-04    |
| 0,001451619 | 0,022038492 |
| 0,003194183 | 0,036538699 |
| 0,005228055 | 0,04957882  |
| 6,57E-04    | 0,013299131 |
| 0,002084942 | 0,027656832 |
| 0,005018088 | 0,04825685  |
| 5,40E-06    | 6,87E-04    |
| 0,004177223 | 0,043323191 |
| 0,001802361 | 0,025151746 |
| 4,01E-07    | 1,60E-04    |
| 9,56E-05    | 0,003872167 |
| 5,08E-05    | 0,002582144 |
| 8,17E-04    | 0,015269911 |
| 0,001404079 | 0,021574092 |
| 0,001778967 | 0,024981814 |
| 3,26E-06    | 5,07E-04    |
| 1,19E-05    | 0,001066623 |
| 9,05E-04    | 0,01638305  |
| 0,001610974 | 0,023481426 |
| 1,07E-05    | 0,001003929 |
| 2,75E-04    | 0,007651372 |
| 1,80E-04    | 0,005807147 |
| 1,34E-04    | 0,004865203 |
| 4,29E-04    | 0,010145058 |
| 0,003595563 | 0,039274342 |
| 1,41E-06    | 3,25E-04    |
| 1,04E-04    | 0,004101057 |
| 4,98E-07    | 1,80E-04    |
| 0,004316455 | 0,044057139 |
| 9,92E-05    | 0,003980781 |
| 3,65E-06    | 5,43E-04    |
| 3,75E-06    | 5,50E-04    |
| 3,20E-04    | 0,008374494 |
| 2,70E-07    | 1,25E-04    |
| 6,28E-05    | 0,00297339  |
| 1,11E-07    | 9,12E-05    |
| 2,04E-06    | 3,79E-04    |
| 0,001998063 | 0,02679967  |
| 0,004282553 | 0,043964518 |
| 0,00463557  | 0,045763928 |
| 4,06E-05    | 0,002284185 |
| 3,18E-04    | 0,00835234  |
| 0,002725661 | 0,033019266 |
| 0,002448002 | 0,03081204  |
| 0,003550083 | 0,038949484 |
| 1,92E-07    | 1,05E-04    |
| 0,001315607 | 0,020768119 |
| 0,002379201 | 0,030210695 |
| 2,77E-06    | 4,55E-04    |
| 0,002466579 | 0,030951043 |

# Supplementary\_table\_S3

|             |             |
|-------------|-------------|
| 5,87E-04    | 0,012347473 |
| 8,83E-07    | 2,43E-04    |
| 8,09E-05    | 0,00347139  |
| 7,35E-05    | 0,003273769 |
| 3,49E-04    | 0,008866778 |
| 2,17E-04    | 0,006538307 |
| 4,99E-05    | 0,00255176  |
| 3,26E-05    | 0,00197257  |
| 0,001007817 | 0,017563463 |
| 4,64E-04    | 0,010662758 |
| 3,17E-06    | 5,00E-04    |
| 2,72E-09    | 1,54E-05    |
| 0,002468609 | 0,030962498 |
| 9,43E-04    | 0,01685263  |
| 2,96E-05    | 0,001882462 |
| 1,08E-04    | 0,004173632 |
| 4,37E-05    | 0,002372014 |
| 0,004646906 | 0,045845351 |
| 0,003914114 | 0,04148648  |
| 9,62E-04    | 0,017050591 |
| 2,00E-05    | 0,001493338 |
| 6,50E-05    | 0,003042768 |
| 4,24E-06    | 5,89E-04    |
| 2,55E-06    | 4,32E-04    |
| 0,001123068 | 0,018927714 |
| 0,002556211 | 0,031637634 |
| 0,001236611 | 0,020027944 |
| 5,85E-06    | 7,20E-04    |
| 2,03E-05    | 0,001504204 |
| 2,63E-04    | 0,007469042 |
| 0,001453315 | 0,02205041  |
| 4,75E-05    | 0,002469869 |
| 8,57E-06    | 8,69E-04    |
| 1,67E-06    | 3,54E-04    |
| 2,84E-09    | 1,54E-05    |
| 3,11E-05    | 0,001929977 |
| 1,59E-05    | 0,001271059 |
| 0,00468061  | 0,046045291 |
| 1,42E-08    | 3,87E-05    |
| 1,34E-05    | 0,001153897 |
| 0,001645421 | 0,023775293 |
| 8,82E-07    | 2,43E-04    |
| 1,91E-04    | 0,006024593 |
| 8,34E-04    | 0,015461534 |
| 7,43E-08    | 7,36E-05    |
| 4,70E-04    | 0,010733718 |
| 1,83E-04    | 0,005859569 |
| 3,19E-04    | 0,008356089 |
| 0,005184623 | 0,049346975 |
| 1,13E-05    | 0,0010264   |
| 0,001721069 | 0,024454003 |
| 0,002062416 | 0,027431544 |
| 2,07E-05    | 0,001531483 |

# Supplementary\_table\_S3

|             |             |
|-------------|-------------|
| 9,55E-04    | 0,016963597 |
| 0,004641142 | 0,045798632 |
| 2,40E-04    | 0,007015557 |
| 3,76E-04    | 0,009305519 |
| 4,42E-04    | 0,010303274 |
| 1,23E-04    | 0,004584159 |
| 0,001663157 | 0,023894678 |
| 0,004715106 | 0,046262045 |
| 9,30E-07    | 2,51E-04    |
| 4,36E-05    | 0,002369675 |
| 1,59E-05    | 0,001271059 |
| 8,26E-06    | 8,55E-04    |
| 6,94E-06    | 7,89E-04    |
| 4,19E-05    | 0,002309922 |
| 2,00E-05    | 0,001493338 |
| 2,89E-05    | 0,001866567 |
| 0,001317661 | 0,020768119 |
| 2,69E-04    | 0,007582082 |
| 2,71E-06    | 4,52E-04    |
| 8,70E-05    | 0,003633354 |
| 6,81E-07    | 2,26E-04    |
| 4,22E-06    | 5,88E-04    |
| 0,002951104 | 0,03477618  |
| 4,54E-04    | 0,010499577 |
| 1,30E-06    | 3,11E-04    |
| 2,78E-07    | 1,25E-04    |
| 0,005134062 | 0,049054412 |
| 2,84E-05    | 0,001853066 |
| 4,01E-05    | 0,002271484 |
| 1,36E-05    | 0,001163626 |
| 1,69E-04    | 0,005589448 |
| 1,16E-05    | 0,001047143 |
| 0,002809233 | 0,033629258 |
| 0,001834165 | 0,025373107 |
| 4,98E-05    | 0,00255176  |
| 1,05E-04    | 0,004112788 |
| 0,001424909 | 0,021796405 |
| 8,74E-05    | 0,0036389   |
| 7,69E-04    | 0,014693293 |
| 9,39E-04    | 0,016823018 |
| 0,002828842 | 0,033791349 |
| 3,96E-04    | 0,009682712 |
| 4,36E-04    | 0,010246217 |
| 2,23E-05    | 0,001589936 |
| 1,72E-04    | 0,005640263 |
| 5,43E-05    | 0,002685209 |
| 5,26E-04    | 0,011631738 |
| 8,89E-05    | 0,003663147 |
| 5,72E-05    | 0,002796463 |
| 0,003653527 | 0,039638719 |
| 1,55E-04    | 0,00531987  |
| 4,57E-05    | 0,002421285 |
| 0,001659384 | 0,023851436 |

# Supplementary\_table\_S3

|             |             |
|-------------|-------------|
| 6,50E-07    | 2,19E-04    |
| 0,001719694 | 0,02445007  |
| 3,22E-04    | 0,008428463 |
| 5,55E-07    | 1,96E-04    |
| 5,63E-05    | 0,002766075 |
| 3,60E-05    | 0,002087579 |
| 0,003776759 | 0,040411233 |
| 1,12E-05    | 0,0010264   |
| 1,70E-04    | 0,005596861 |
| 4,15E-04    | 0,009972409 |
| 0,001511825 | 0,02262101  |
| 5,59E-05    | 0,002757279 |
| 0,001622018 | 0,02359607  |
| 1,48E-05    | 0,0012271   |
| 0,003614715 | 0,039415874 |
| 0,003172873 | 0,036331092 |
| 7,55E-05    | 0,003322643 |
| 1,82E-04    | 0,005859569 |
| 5,06E-05    | 0,002578156 |
| 3,65E-04    | 0,009118993 |
| 4,32E-04    | 0,010199607 |
| 4,68E-04    | 0,010712584 |
| 9,46E-06    | 9,29E-04    |
| 7,99E-06    | 8,41E-04    |
| 6,21E-04    | 0,012803766 |
| 1,14E-04    | 0,004330838 |
| 0,001586342 | 0,02326732  |
| 0,003191709 | 0,03651978  |
| 6,69E-05    | 0,003086377 |
| 0,001299804 | 0,020651518 |
| 4,05E-04    | 0,009828813 |
| 0,001080951 | 0,018469462 |
| 4,39E-04    | 0,010291188 |
| 2,33E-05    | 0,001631936 |
| 0,001415935 | 0,021715596 |
| 3,31E-05    | 0,001989127 |
| 0,002735779 | 0,033060917 |
| 8,65E-07    | 2,43E-04    |
| 5,07E-04    | 0,011347845 |
| 2,12E-04    | 0,006473832 |
| 2,00E-04    | 0,00621794  |
| 1,84E-04    | 0,005882942 |
| 5,36E-04    | 0,011772227 |
| 9,87E-05    | 0,003963071 |
| 0,000325685 | 0,008477337 |
| 2,74E-04    | 0,007631192 |
| 2,85E-04    | 0,007759204 |
| 8,76E-04    | 0,016017809 |
| 0,001505971 | 0,022568821 |
| 1,12E-08    | 3,58E-05    |
| 3,47E-08    | 5,53E-05    |
| 0,001350991 | 0,021135472 |
| 3,55E-04    | 0,008975952 |

# Supplementary\_table\_S3

|             |             |
|-------------|-------------|
| 5,25E-04    | 0,01161901  |
| 8,91E-05    | 0,003667905 |
| 5,21E-04    | 0,011567186 |
| 3,12E-04    | 0,008285523 |
| 1,23E-04    | 0,004577354 |
| 1,61E-05    | 0,001277097 |
| 1,07E-09    | 9,56E-06    |
| 5,02E-06    | 6,56E-04    |
| 0,001125098 | 0,0189374   |
| 0,003068169 | 0,035591387 |
| 0,005042044 | 0,048445384 |
| 7,09E-07    | 2,29E-04    |
| 0,002605758 | 0,032063786 |
| 1,45E-05    | 0,001208197 |
| 4,70E-06    | 6,32E-04    |
| 8,86E-05    | 0,003655625 |
| 7,58E-05    | 0,003331099 |
| 2,11E-05    | 0,001543562 |
| 1,09E-05    | 0,001016299 |
| 2,25E-05    | 0,001599003 |
| 3,02E-05    | 0,001903029 |
| 3,22E-05    | 0,001964194 |
| 0,00483648  | 0,047028192 |
| 8,28E-04    | 0,015382717 |
| 0,005086976 | 0,048750913 |
| 0,004178842 | 0,043329225 |
| 0,002986076 | 0,034967748 |
| 7,07E-05    | 0,003197124 |
| 1,41E-04    | 0,004993368 |
| 1,70E-07    | 1,01E-04    |
| 1,60E-05    | 0,001271059 |
| 3,81E-05    | 0,002179315 |
| 1,75E-06    | 3,58E-04    |
| 3,04E-06    | 4,86E-04    |
| 7,07E-04    | 0,013892214 |
| 2,48E-04    | 0,007181343 |
| 2,71E-04    | 0,007609606 |
| 0,003631562 | 0,039507038 |
| 0,002879518 | 0,034222313 |
| 5,76E-04    | 0,012214826 |
| 4,89E-07    | 1,80E-04    |
| 1,47E-04    | 0,005133223 |
| 2,50E-04    | 0,007214493 |
| 6,32E-06    | 7,54E-04    |
| 4,15E-05    | 0,002295678 |
| 0,002225451 | 0,02891788  |
| 0,00271891  | 0,032968933 |
| 2,83E-04    | 0,007759204 |
| 2,85E-04    | 0,007759204 |
| 4,85E-05    | 0,002511431 |
| 2,30E-04    | 0,006830579 |
| 4,12E-05    | 0,002295678 |
| 3,56E-05    | 0,002082716 |

# Supplementary\_table\_S3

|             |             |
|-------------|-------------|
| 2,15E-05    | 0,001561322 |
| 0,002219489 | 0,028865673 |
| 6,48E-06    | 7,62E-04    |
| 2,14E-05    | 0,00155716  |
| 0,001349939 | 0,021128483 |
| 8,07E-04    | 0,015146987 |
| 7,18E-07    | 2,30E-04    |
| 3,23E-06    | 5,06E-04    |
| 2,31E-05    | 0,001621293 |
| 0,002550969 | 0,031616682 |
| 0,005021568 | 0,048279886 |
| 2,92E-05    | 0,001866567 |
| 5,87E-04    | 0,012347473 |
| 2,99E-04    | 0,00802704  |
| 0,00139948  | 0,021539802 |
| 2,62E-05    | 0,001751934 |
| 1,74E-04    | 0,005710542 |
| 4,87E-08    | 5,81E-05    |
| 0,001008768 | 0,017572821 |
| 3,96E-05    | 0,002250044 |
| 5,04E-04    | 0,011292187 |
| 8,65E-05    | 0,003620006 |
| 0,001824258 | 0,025306679 |
| 1,90E-04    | 0,006020961 |
| 4,22E-05    | 0,002318163 |
| 1,60E-04    | 0,005409546 |
| 2,77E-06    | 4,55E-04    |
| 9,52E-04    | 0,016928334 |
| 7,01E-07    | 2,29E-04    |
| 2,91E-04    | 0,00787259  |
| 0,001861876 | 0,025605253 |
| 8,21E-05    | 0,003498171 |
| 2,03E-07    | 1,09E-04    |
| 2,32E-04    | 0,006865487 |
| 2,43E-07    | 1,19E-04    |
| 0,003334208 | 0,037586179 |
| 8,33E-06    | 8,57E-04    |
| 1,15E-05    | 0,001040261 |
| 1,29E-05    | 0,001122176 |
| 8,19E-05    | 0,003496598 |
| 2,16E-04    | 0,006532318 |
| 0,003437674 | 0,038291557 |
| 5,96E-06    | 7,30E-04    |
| 1,52E-04    | 0,005268767 |
| 1,75E-04    | 0,005725516 |
| 1,97E-05    | 0,001477876 |
| 1,25E-05    | 0,001100853 |
| 1,50E-07    | 1,01E-04    |
| 0,004090941 | 0,0428072   |
| 2,31E-04    | 0,006834019 |
| 1,26E-04    | 0,004674132 |
| 8,18E-04    | 0,015284899 |
| 4,03E-05    | 0,002279811 |

# Supplementary\_table\_S3

|             |             |
|-------------|-------------|
| 0,00514102  | 0,049089301 |
| 4,06E-07    | 1,60E-04    |
| 1,59E-07    | 1,01E-04    |
| 1,52E-06    | 3,40E-04    |
| 7,34E-05    | 0,003273769 |
| 3,88E-04    | 0,009536714 |
| 0,004651961 | 0,045874903 |
| 1,12E-05    | 0,0010264   |
| 0,001458081 | 0,022106452 |
| 5,73E-04    | 0,0121996   |
| 0,003095172 | 0,035752302 |
| 1,00E-05    | 9,62E-04    |
| 0,003636056 | 0,039511585 |
| 1,78E-04    | 0,005792816 |
| 4,94E-07    | 1,80E-04    |
| 0,001757152 | 0,02476917  |
| 4,45E-04    | 0,010352855 |
| 0,003243446 | 0,036912635 |
| 0,004128607 | 0,043089194 |
| 2,07E-04    | 0,006360711 |
| 8,86E-05    | 0,003655625 |
| 0,005248648 | 0,049690921 |
| 8,28E-04    | 0,01538217  |
| 0,002267891 | 0,029323929 |
| 2,24E-04    | 0,006689908 |
| 3,55E-04    | 0,008975952 |
| 2,33E-04    | 0,006866107 |
| 4,73E-07    | 1,80E-04    |
| 1,09E-04    | 0,004200837 |
| 7,79E-06    | 8,29E-04    |
| 0,003034831 | 0,03538835  |
| 5,77E-04    | 0,012214826 |
| 4,71E-04    | 0,010746062 |
| 1,20E-04    | 0,004520192 |
| 4,67E-05    | 0,002454888 |
| 8,75E-05    | 0,003638921 |
| 8,89E-04    | 0,016169339 |
| 8,63E-04    | 0,015840193 |
| 8,79E-05    | 0,003644185 |
| 2,83E-04    | 0,007759204 |
| 0,003069293 | 0,035594531 |
| 0,003473523 | 0,038488703 |
| 1,57E-04    | 0,005339261 |
| 0,00124166  | 0,020068391 |
| 5,20E-04    | 0,011542969 |
| 0,003624405 | 0,039470296 |
| 0,002150827 | 0,028300541 |
| 0,004071744 | 0,042707216 |
| 0,00133277  | 0,020918579 |
| 1,50E-04    | 0,005220536 |
| 8,72E-06    | 8,78E-04    |
| 0,002276914 | 0,029414981 |
| 1,12E-05    | 0,0010264   |

# Supplementary\_table\_S3

|             |             |
|-------------|-------------|
| 1,35E-04    | 0,004874403 |
| 1,17E-04    | 0,00442011  |
| 6,87E-06    | 7,85E-04    |
| 0,002206435 | 0,02875621  |
| 0,00212682  | 0,028045319 |
| 7,81E-04    | 0,014818336 |
| 8,28E-04    | 0,01538217  |
| 0,001942273 | 0,026336862 |
| 0,003915436 | 0,04148648  |
| 1,69E-07    | 1,01E-04    |
| 6,23E-04    | 0,01282632  |
| 0,001641236 | 0,023736113 |
| 9,66E-04    | 0,017066695 |
| 0,002549003 | 0,031601104 |
| 1,27E-04    | 0,004678451 |
| 1,09E-04    | 0,004200837 |
| 9,43E-05    | 0,003823755 |
| 8,78E-05    | 0,00364409  |
| 1,04E-05    | 9,89E-04    |
| 5,08E-04    | 0,011373556 |
| 2,72E-05    | 0,001791338 |
| 0,003249898 | 0,036976619 |
| 0,001043543 | 0,01798205  |
| 2,87E-05    | 0,001864815 |
| 0,001229738 | 0,019948081 |
| 5,60E-04    | 0,012055378 |
| 9,65E-04    | 0,017065388 |
| 0,003592097 | 0,039255732 |
| 2,77E-04    | 0,007698371 |
| 0,001351334 | 0,021135472 |
| 0,003700664 | 0,03998117  |
| 0,00152996  | 0,022754778 |
| 1,20E-04    | 0,004520192 |
| 0,001719127 | 0,02445007  |
| 5,65E-05    | 0,002769697 |
| 0,001958992 | 0,026490989 |
| 0,00463938  | 0,04579139  |
| 7,08E-05    | 0,003200438 |
| 2,12E-05    | 0,00154523  |
| 0,001336157 | 0,020956959 |
| 0,001586361 | 0,02326732  |
| 1,83E-05    | 0,001392836 |
| 0,001910481 | 0,02604851  |
| 6,04E-04    | 0,012577491 |
| 0,001758495 | 0,024780263 |
| 0,001108931 | 0,018788974 |
| 1,33E-06    | 3,11E-04    |
| 9,93E-04    | 0,01739428  |
| 0,002741081 | 0,033078498 |
| 4,99E-05    | 0,00255176  |
| 1,26E-07    | 9,51E-05    |
| 1,23E-05    | 0,001083856 |
| 3,19E-04    | 0,008357302 |



# Supplementary\_table\_S3

|             |             |
|-------------|-------------|
| 1,85E-04    | 0,005907665 |
| 0,001308753 | 0,020716799 |
| 0,003699258 | 0,039975681 |
| 0,001089623 | 0,018560672 |
| 6,69E-05    | 0,003086377 |
| 7,75E-04    | 0,014764852 |
| 9,18E-04    | 0,016581833 |
| 0,004920059 | 0,047664005 |
| 1,47E-05    | 0,001223516 |
| 1,12E-04    | 0,004291356 |
| 0,004257088 | 0,043795131 |
| 1,38E-04    | 0,00493993  |
| 0,001199274 | 0,019652056 |
| 8,07E-05    | 0,00347139  |
| 0,001378077 | 0,021345322 |
| 0,004717064 | 0,046271065 |
| 0,004816845 | 0,04690304  |
| 0,004054542 | 0,042595646 |
| 8,78E-04    | 0,01604366  |
| 2,04E-04    | 0,006298026 |
| 0,001798198 | 0,025109389 |
| 5,45E-04    | 0,011872371 |
| 0,003470114 | 0,038466303 |
| 0,002953274 | 0,034782604 |
| 1,22E-05    | 0,001083856 |
| 2,13E-04    | 0,006473832 |
| 0,001470902 | 0,022210119 |
| 8,89E-05    | 0,003663147 |
| 0,001877915 | 0,025754265 |
| 0,003982891 | 0,042001399 |
| 3,91E-08    | 5,53E-05    |
| 5,91E-04    | 0,012391163 |
| 1,20E-04    | 0,004520192 |
| 0,004175035 | 0,043320001 |
| 4,75E-05    | 0,002469869 |
| 0,002310572 | 0,029673229 |
| 1,38E-05    | 0,001168161 |
| 1,74E-04    | 0,005702482 |
| 2,84E-04    | 0,007759204 |
| 0,003882014 | 0,041220608 |
| 0,005255402 | 0,049744292 |
| 7,51E-05    | 0,003316898 |
| 0,004071874 | 0,042707216 |
| 8,07E-06    | 8,48E-04    |
| 3,14E-05    | 0,001938712 |
| 5,10E-04    | 0,011387241 |
| 5,96E-04    | 0,012454438 |
| 1,31E-04    | 0,004794554 |
| 2,95E-05    | 0,001878444 |
| 3,32E-06    | 5,11E-04    |
| 3,31E-04    | 0,008531228 |
| 3,48E-06    | 5,22E-04    |
| 0,00335662  | 0,037728312 |

# Supplementary\_table\_S3

|             |             |
|-------------|-------------|
| 3,59E-04    | 0,009017286 |
| 0,002330396 | 0,029818296 |
| 1,14E-04    | 0,004332165 |
| 0,00203235  | 0,027112609 |
| 0,003398774 | 0,03808679  |
| 0,001553999 | 0,022966602 |
| 0,001142626 | 0,019069743 |
| 2,46E-04    | 0,007151821 |
| 4,88E-06    | 6,43E-04    |
| 3,27E-06    | 5,07E-04    |
| 4,81E-06    | 6,42E-04    |
| 3,64E-06    | 5,42E-04    |
| 0,002464446 | 0,030944532 |
| 0,00344513  | 0,038329654 |
| 0,00100042  | 0,017461876 |
| 1,73E-05    | 0,001340171 |
| 2,41E-04    | 0,007039857 |
| 4,45E-04    | 0,010350471 |
| 6,25E-05    | 0,002966695 |
| 3,68E-04    | 0,009156433 |
| 8,83E-05    | 0,003654516 |
| 0,001913868 | 0,02607075  |
| 0,001199577 | 0,019652056 |
| 1,35E-04    | 0,004878962 |
| 1,50E-04    | 0,005236424 |
| 0,001787587 | 0,025021877 |
| 8,13E-05    | 0,003482339 |
| 3,63E-04    | 0,009093356 |
| 0,001607139 | 0,023448548 |
| 0,002877812 | 0,034211167 |
| 6,08E-05    | 0,002924537 |
| 0,00146455  | 0,022178925 |
| 3,33E-05    | 0,001997493 |
| 8,11E-04    | 0,015197903 |
| 8,21E-05    | 0,003498171 |
| 3,05E-05    | 0,001914476 |
| 6,73E-04    | 0,0134934   |
| 2,21E-04    | 0,00665431  |
| 2,70E-07    | 1,25E-04    |
| 7,93E-04    | 0,014958655 |
| 8,24E-06    | 8,55E-04    |
| 0,003064661 | 0,035591387 |
| 6,65E-04    | 0,013400091 |
| 2,28E-04    | 0,006772639 |
| 1,46E-04    | 0,005110857 |
| 7,30E-04    | 0,014205812 |
| 0,001379692 | 0,021354067 |
| 5,38E-04    | 0,011786355 |
| 5,77E-05    | 0,002815762 |
| 9,85E-07    | 2,61E-04    |
| 4,66E-04    | 0,010680699 |
| 2,02E-06    | 3,78E-04    |
| 4,39E-05    | 0,00237714  |

# Supplementary\_table\_S3

|             |             |
|-------------|-------------|
| 0,001313363 | 0,020745553 |
| 0,002730893 | 0,033037724 |
| 3,78E-05    | 0,002168435 |
| 0,002344361 | 0,029921995 |
| 1,29E-05    | 0,001124128 |
| 1,43E-04    | 0,005059531 |
| 0,001507534 | 0,022579552 |
| 1,01E-05    | 9,66E-04    |
| 7,86E-05    | 0,003413946 |
| 1,68E-04    | 0,005575242 |
| 0,001540861 | 0,02284063  |
| 6,64E-04    | 0,013380138 |
| 0,00340377  | 0,03813318  |
| 1,62E-06    | 3,50E-04    |
| 3,34E-05    | 0,001997493 |
| 0,001264578 | 0,020273251 |
| 1,31E-06    | 3,11E-04    |
| 8,71E-05    | 0,003634002 |
| 8,40E-04    | 0,015538615 |
| 0,004246814 | 0,043728635 |
| 0,002141955 | 0,02820315  |
| 0,004837559 | 0,047028419 |
| 0,001639795 | 0,023727325 |
| 0,002095795 | 0,027734734 |
| 1,06E-05    | 0,001003929 |
| 1,38E-04    | 0,00493993  |
| 6,38E-04    | 0,013033696 |
| 0,004603224 | 0,045625713 |
| 4,52E-05    | 0,002410418 |
| 0,001105336 | 0,018771646 |
| 0,002175648 | 0,028478286 |
| 9,87E-06    | 9,56E-04    |
| 0,003107972 | 0,035837818 |
| 9,23E-04    | 0,016653552 |
| 0,001532256 | 0,022773704 |
| 6,88E-04    | 0,013684083 |
| 0,001182502 | 0,019510932 |
| 2,68E-04    | 0,007573075 |
| 1,40E-07    | 1,01E-04    |
| 0,002363794 | 0,03009227  |
| 2,90E-05    | 0,001866567 |
| 1,44E-04    | 0,005076355 |
| 0,004897378 | 0,047464925 |
| 0,000219516 | 0,006606841 |
| 5,73E-04    | 0,012199818 |
| 9,07E-05    | 0,003710916 |
| 0,003868127 | 0,041102541 |
| 3,95E-04    | 0,009681935 |
| 1,53E-04    | 0,005277706 |
| 8,50E-04    | 0,015665073 |
| 7,90E-07    | 2,31E-04    |
| 6,96E-05    | 0,003165786 |
| 1,61E-07    | 1,01E-04    |

# Supplementary\_table\_S3

|             |             |
|-------------|-------------|
| 0,002527257 | 0,031418958 |
| 4,93E-04    | 0,011134576 |
| 5,86E-04    | 0,012342533 |
| 0,001601337 | 0,023409897 |
| 9,78E-04    | 0,017228877 |
| 1,67E-07    | 1,01E-04    |
| 2,29E-05    | 0,001612054 |
| 2,12E-04    | 0,006473832 |
| 0,002354107 | 0,030003244 |
| 2,54E-05    | 0,001709835 |
| 2,52E-04    | 0,007270392 |
| 3,48E-05    | 0,002050321 |
| 0,002280283 | 0,029441425 |
| 0,001360881 | 0,021217735 |
| 0,00101611  | 0,017645855 |
| 0,004040781 | 0,042481132 |
| 0,001400216 | 0,021539802 |
| 9,87E-04    | 0,017336748 |
| 2,23E-04    | 0,006675064 |
| 3,24E-04    | 0,008459166 |
| 0,003768424 | 0,040370532 |
| 1,52E-04    | 0,005270661 |
| 8,96E-04    | 0,016253823 |
| 0,004793047 | 0,046748741 |
| 1,63E-05    | 0,001283741 |
| 0,002921256 | 0,034552428 |
| 0,001600964 | 0,023409897 |
| 9,46E-04    | 0,016856745 |
| 1,06E-04    | 0,004117345 |
| 3,13E-06    | 4,96E-04    |
| 6,66E-05    | 0,003085695 |
| 9,97E-04    | 0,017433268 |
| 0,001192453 | 0,019596709 |
| 9,75E-04    | 0,017188545 |
| 9,21E-06    | 9,13E-04    |
| 0,002173774 | 0,028470627 |
| 4,90E-05    | 0,002527141 |
| 2,82E-04    | 0,007759204 |
| 1,83E-05    | 0,001392836 |
| 1,56E-04    | 0,005322108 |
| 0,002753043 | 0,03315805  |
| 7,77E-04    | 0,014772651 |
| 5,81E-04    | 0,012276461 |
| 8,93E-05    | 0,003672458 |
| 5,70E-04    | 0,012167981 |
| 0,002589442 | 0,031915916 |
| 2,40E-06    | 4,17E-04    |
| 5,35E-04    | 0,011763648 |
| 1,15E-04    | 0,004360192 |
| 0,00501177  | 0,048222952 |
| 7,50E-06    | 8,21E-04    |
| 1,59E-04    | 0,005386936 |
| 1,71E-04    | 0,005634328 |

# Supplementary\_table\_S3

|             |             |
|-------------|-------------|
| 3,86E-06    | 5,58E-04    |
| 6,74E-04    | 0,01350011  |
| 0,001159966 | 0,019258118 |
| 0,001654224 | 0,02381569  |
| 4,80E-04    | 0,010896177 |
| 5,78E-05    | 0,00281815  |
| 7,12E-05    | 0,003202345 |
| 7,53E-04    | 0,014499707 |
| 2,65E-05    | 0,001761829 |
| 6,24E-05    | 0,002966695 |
| 7,74E-06    | 8,29E-04    |
| 0,00169841  | 0,024232532 |
| 5,92E-04    | 0,012403501 |
| 5,19E-05    | 0,002607757 |
| 0,004390976 | 0,044432451 |
| 0,005118692 | 0,048950456 |
| 0,005287176 | 0,049960108 |
| 2,00E-05    | 0,001493338 |
| 0,00294651  | 0,034740424 |
| 0,002664202 | 0,032513486 |
| 2,87E-05    | 0,001864815 |
| 6,01E-06    | 7,30E-04    |
| 4,53E-04    | 0,010478695 |
| 0,001132931 | 0,018991869 |
| 0,001649418 | 0,02377568  |
| 3,57E-04    | 0,00899617  |
| 3,30E-05    | 0,001985972 |
| 3,19E-05    | 0,001953832 |
| 0,002019415 | 0,026972362 |
| 7,38E-07    | 2,31E-04    |
| 3,00E-04    | 0,008030125 |
| 1,27E-04    | 0,004678451 |
| 0,004934739 | 0,047755387 |
| 3,32E-04    | 0,008541105 |
| 5,14E-05    | 0,002590842 |
| 0,004369836 | 0,044336631 |
| 0,003762492 | 0,040343791 |
| 5,77E-04    | 0,012214826 |
| 0,001760268 | 0,024797396 |
| 2,44E-04    | 0,007110825 |
| 0,001226934 | 0,019931635 |
| 0,002985321 | 0,034967748 |
| 1,88E-06    | 3,66E-04    |
| 5,34E-04    | 0,011748472 |
| 0,004339011 | 0,044137222 |
| 0,001544176 | 0,022873018 |
| 0,004191525 | 0,043410208 |
| 1,63E-04    | 0,005463718 |
| 7,25E-04    | 0,014150598 |
| 1,47E-06    | 3,35E-04    |
| 0,004726658 | 0,046324367 |
| 4,41E-04    | 0,010291188 |
| 2,61E-04    | 0,007447042 |

# Supplementary\_table\_S3

|             |             |
|-------------|-------------|
| 4,54E-05    | 0,002413998 |
| 2,58E-04    | 0,007407658 |
| 0,002660729 | 0,032495221 |
| 1,81E-04    | 0,005841792 |
| 1,61E-04    | 0,005409546 |
| 1,07E-07    | 9,12E-05    |
| 2,71E-04    | 0,007609606 |
| 0,001558458 | 0,02301722  |
| 0,003067986 | 0,035591387 |
| 1,05E-04    | 0,004112788 |
| 0,002885138 | 0,034261687 |
| 1,55E-06    | 3,40E-04    |
| 0,00102809  | 0,017777655 |
| 0,001522544 | 0,022727947 |
| 2,13E-04    | 0,006473832 |
| 0,002917691 | 0,034537771 |
| 0,002785778 | 0,033447355 |
| 6,75E-04    | 0,013511038 |
| 0,00437496  | 0,044340892 |
| 1,50E-04    | 0,005235277 |
| 1,55E-04    | 0,00531987  |
| 4,93E-04    | 0,011129617 |
| 3,28E-04    | 0,008498288 |
| 8,18E-05    | 0,003495025 |
| 0,002457746 | 0,030908484 |
| 0,001088147 | 0,018549713 |
| 0,003894885 | 0,041337059 |
| 9,39E-06    | 9,25E-04    |
| 6,43E-06    | 7,62E-04    |
| 0,005050226 | 0,048492621 |
| 4,88E-04    | 0,011028096 |
| 0,002857698 | 0,034053857 |
| 0,003229582 | 0,036783045 |
| 2,92E-05    | 0,001866567 |
| 0,003585867 | 0,039206885 |
| 0,001009749 | 0,017576503 |
| 4,30E-05    | 0,002351749 |
| 0,002987771 | 0,034967748 |
| 1,82E-06    | 3,63E-04    |
| 1,66E-04    | 0,005525897 |
| 0,001891061 | 0,02589469  |
| 7,98E-05    | 0,003448841 |
| 0,002675795 | 0,032628141 |
| 0,002646603 | 0,032396337 |
| 5,27E-04    | 0,011631738 |
| 5,31E-06    | 6,78E-04    |
| 3,29E-04    | 0,008506843 |
| 2,85E-04    | 0,007759204 |
| 2,22E-04    | 0,006655488 |
| 0,004744116 | 0,046444376 |
| 0,005111829 | 0,048915426 |
| 5,13E-06    | 6,62E-04    |
| 5,82E-05    | 0,002828204 |

# Supplementary\_table\_S3

|             |             |
|-------------|-------------|
| 2,43E-04    | 0,007094663 |
| 6,28E-05    | 0,00297339  |
| 4,92E-05    | 0,002534058 |
| 0,00137707  | 0,021345322 |
| 4,07E-04    | 0,009842211 |
| 0,003823042 | 0,040769354 |
| 0,00216032  | 0,028352767 |
| 0,002567093 | 0,031737053 |
| 0,001221068 | 0,019858075 |
| 0,002466689 | 0,030951043 |
| 7,77E-06    | 8,29E-04    |
| 0,001564447 | 0,023067435 |
| 9,45E-04    | 0,01685263  |
| 0,001945044 | 0,0263584   |
| 2,57E-04    | 0,007369432 |
| 2,05E-07    | 1,09E-04    |
| 1,95E-06    | 3,70E-04    |
| 3,29E-06    | 5,08E-04    |
| 8,18E-06    | 8,55E-04    |
| 6,23E-05    | 0,002965203 |
| 0,001357613 | 0,021196471 |
| 2,59E-04    | 0,007407658 |
| 0,001477574 | 0,022274557 |
| 2,42E-04    | 0,00707096  |
| 0,005048261 | 0,048490649 |
| 2,06E-04    | 0,006351359 |
| 0,001961028 | 0,026502441 |
| 0,002464781 | 0,030944532 |
| 7,43E-04    | 0,014366294 |
| 0,002396995 | 0,030384677 |
| 2,62E-05    | 0,001751934 |
| 1,37E-04    | 0,00491802  |
| 2,34E-05    | 0,001631936 |
| 2,94E-06    | 4,74E-04    |
| 0,00200112  | 0,026832603 |
| 0,001320928 | 0,020777184 |
| 0,001081985 | 0,018472949 |
| 3,28E-04    | 0,008502437 |
| 0,002294538 | 0,02955694  |
| 1,80E-04    | 0,005807147 |
| 9,60E-05    | 0,0038798   |
| 4,66E-04    | 0,010679977 |
| 8,29E-05    | 0,003515744 |
| 9,84E-08    | 8,64E-05    |
| 4,15E-06    | 5,83E-04    |
| 1,76E-04    | 0,005735638 |
| 0,001741836 | 0,024662543 |
| 0,001765206 | 0,024827703 |
| 1,81E-06    | 3,63E-04    |
| 7,00E-05    | 0,003178087 |
| 1,01E-04    | 0,004043151 |
| 1,52E-04    | 0,005270661 |
| 6,53E-05    | 0,003046679 |

# Supplementary\_table\_S3

|             |             |
|-------------|-------------|
| 0,00143833  | 0,021946324 |
| 0,003095452 | 0,035752302 |
| 2,44E-05    | 0,001676124 |
| 1,57E-04    | 0,005339261 |
| 1,08E-05    | 0,001009308 |
| 0,00163159  | 0,023665653 |
| 0,004409441 | 0,044526934 |
| 8,28E-05    | 0,003514642 |
| 0,003634151 | 0,039511585 |
| 4,40E-07    | 1,70E-04    |
| 1,31E-04    | 0,004788126 |
| 5,56E-04    | 0,012019926 |
| 1,21E-04    | 0,004530468 |
| 0,003562823 | 0,039036452 |
| 4,68E-04    | 0,010705797 |
| 1,06E-04    | 0,004125438 |
| 8,11E-06    | 8,50E-04    |
| 1,13E-04    | 0,004314575 |
| 0,003239342 | 0,036875347 |
| 0,004301639 | 0,044022306 |
| 2,82E-05    | 0,001839391 |
| 0,001480528 | 0,02230255  |
| 2,04E-04    | 0,006298026 |
| 3,65E-04    | 0,009118993 |
| 0,004477116 | 0,044886035 |
| 2,24E-04    | 0,006689908 |
| 0,004749515 | 0,046487013 |
| 2,34E-06    | 0,000411684 |
| 5,74E-04    | 0,012206185 |
| 6,24E-04    | 0,012841012 |
| 4,34E-04    | 0,010215739 |
| 0,001671077 | 0,023957078 |
| 1,17E-07    | 9,12E-05    |
| 2,97E-05    | 0,001882462 |
| 0,004049346 | 0,042551087 |
| 0,002624357 | 0,032230315 |
| 0,002642187 | 0,032386787 |
| 0,001363392 | 0,021224826 |
| 0,00404049  | 0,042481132 |
| 2,16E-06    | 3,97E-04    |
| 3,95E-04    | 0,009682467 |
| 2,62E-04    | 0,007462687 |
| 8,38E-07    | 2,43E-04    |
| 0,002121084 | 0,027986248 |
| 2,99E-04    | 0,008020929 |
| 9,02E-04    | 0,016341619 |
| 7,44E-06    | 8,19E-04    |
| 2,83E-04    | 0,007759204 |
| 1,88E-04    | 0,005994917 |
| 1,38E-05    | 0,001168161 |
| 0,004839722 | 0,047035194 |
| 4,84E-06    | 6,43E-04    |
| 3,83E-04    | 0,009456708 |



# Supplementary\_table\_S3

|             |             |
|-------------|-------------|
| 0,00426101  | 0,043795131 |
| 5,95E-04    | 0,012448848 |
| 6,88E-04    | 0,013684083 |
| 1,99E-04    | 0,006191578 |
| 0,003946509 | 0,041749129 |
| 0,002929164 | 0,034618376 |
| 1,30E-04    | 0,004756747 |
| 0,003062325 | 0,035588358 |
| 1,41E-05    | 0,001183429 |
| 1,48E-06    | 3,36E-04    |
| 7,65E-05    | 0,00335817  |
| 0,00349619  | 0,038586294 |
| 1,98E-06    | 3,73E-04    |
| 2,18E-06    | 3,97E-04    |
| 0,003978305 | 0,041964524 |
| 0,00104259  | 0,017972571 |
| 0,002476456 | 0,031012437 |
| 5,74E-04    | 0,012206185 |
| 1,04E-04    | 0,004103487 |
| 5,29E-05    | 0,002642859 |
| 6,11E-04    | 0,012648831 |
| 0,004663705 | 0,045932222 |
| 2,76E-06    | 4,55E-04    |
| 3,00E-04    | 0,008039945 |
| 6,28E-04    | 0,012908933 |
| 0,003435969 | 0,038291557 |
| 0,001629015 | 0,023647584 |
| 9,29E-04    | 0,016717931 |
| 3,15E-04    | 0,008303463 |
| 8,33E-04    | 0,015452174 |
| 5,32E-04    | 0,01171802  |
| 0,003060341 | 0,035587889 |
| 4,15E-05    | 0,002295678 |
| 2,51E-04    | 0,007246812 |
| 1,03E-04    | 0,004082771 |
| 2,33E-04    | 0,00687271  |
| 6,57E-04    | 0,013299131 |
| 1,84E-04    | 0,005894564 |
| 4,22E-05    | 0,002318163 |
| 0,001882632 | 0,025808638 |
| 1,69E-04    | 0,005594526 |
| 9,02E-04    | 0,016341619 |
| 1,84E-05    | 0,001392836 |
| 0,004165131 | 0,043267631 |
| 0,002311113 | 0,029673229 |
| 0,001068279 | 0,018302682 |
| 0,001234821 | 0,020023242 |
| 9,66E-04    | 0,017066695 |
| 5,03E-04    | 0,011290289 |
| 1,24E-04    | 0,004605171 |
| 7,74E-04    | 0,014758005 |
| 0,003358731 | 0,037742512 |
| 0,004288975 | 0,04398676  |

# Supplementary\_table\_S3

|             |             |
|-------------|-------------|
| 0,002090937 | 0,027698834 |
| 0,005122649 | 0,048966369 |
| 3,03E-04    | 0,008083667 |
| 0,003571129 | 0,039093722 |
| 0,004840368 | 0,047035194 |
| 4,24E-05    | 0,002328808 |
| 8,82E-04    | 0,016080802 |
| 2,18E-05    | 0,001565683 |
| 3,84E-04    | 0,009471105 |
| 3,16E-04    | 0,008314475 |
| 9,38E-04    | 0,016823018 |
| 0,00316454  | 0,036264793 |
| 4,02E-06    | 5,74E-04    |
| 6,71E-05    | 0,003091112 |
| 0,002446713 | 0,03080452  |
| 8,94E-04    | 0,016230795 |
| 2,98E-04    | 0,008012556 |
| 6,47E-04    | 0,013154321 |
| 0,00319876  | 0,036572893 |
| 0,001640096 | 0,023727325 |
| 3,55E-04    | 0,008975952 |
| 0,001338777 | 0,020975899 |
| 3,24E-04    | 0,008459166 |
| 0,001112576 | 0,01881068  |
| 6,50E-05    | 0,003042768 |
| 0,00113327  | 0,018991869 |
| 0,004711488 | 0,046262045 |
| 0,003939071 | 0,041687333 |
| 3,49E-05    | 0,002054443 |
| 1,61E-04    | 0,005409546 |
| 7,59E-06    | 8,23E-04    |
| 8,61E-05    | 0,003611058 |
| 0,00441031  | 0,044526934 |
| 4,46E-05    | 0,002396026 |
| 1,53E-05    | 0,00124424  |
| 2,96E-07    | 1,27E-04    |
| 0,001216411 | 0,019833021 |
| 0,001425739 | 0,021801625 |
| 0,001720289 | 0,02445072  |
| 0,003631944 | 0,039507038 |
| 6,59E-04    | 0,013308319 |
| 6,57E-06    | 7,62E-04    |
| 0,004308241 | 0,044050124 |
| 0,001172227 | 0,019382212 |
| 0,004648862 | 0,045854495 |
| 0,003862172 | 0,041088269 |
| 3,75E-04    | 0,009304035 |
| 0,004818344 | 0,04690304  |
| 8,16E-04    | 0,015268608 |
| 1,12E-04    | 0,004291356 |
| 2,66E-05    | 0,001764572 |
| 0,003030796 | 0,035350561 |
| 4,72E-05    | 0,002463345 |

# Supplementary\_table\_S3

|             |             |
|-------------|-------------|
| 6,52E-05    | 0,003045123 |
| 0,001158072 | 0,019248187 |
| 1,66E-04    | 0,005536442 |
| 7,57E-04    | 0,014526523 |
| 0,003879605 | 0,041204846 |
| 1,74E-04    | 0,005705655 |
| 8,12E-04    | 0,015210917 |
| 5,62E-04    | 0,012061308 |
| 0,001722375 | 0,024459517 |
| 0,001751687 | 0,024711688 |
| 2,22E-05    | 0,001585299 |
| 0,002615919 | 0,032153285 |
| 0,003355991 | 0,037728312 |
| 1,98E-04    | 0,006169312 |
| 0,001102737 | 0,018755364 |
| 5,61E-04    | 0,012058374 |
| 0,001328002 | 0,020851081 |
| 0,002781533 | 0,033405393 |
| 3,94E-04    | 0,009666818 |
| 0,001676117 | 0,023991307 |
| 2,27E-04    | 0,00674015  |
| 2,96E-05    | 0,001882462 |
| 0,005219768 | 0,049543858 |
| 7,17E-06    | 8,02E-04    |
| 1,41E-04    | 0,004993368 |
| 3,30E-04    | 0,008531228 |
| 3,18E-05    | 0,001953832 |
| 4,59E-04    | 0,01057452  |
| 0,001934416 | 0,0262543   |
| 0,001309732 | 0,020722957 |
| 8,50E-04    | 0,015665073 |
| 0,00129903  | 0,020651518 |
| 0,001151987 | 0,019176536 |
| 1,56E-04    | 0,005322108 |
| 1,45E-04    | 0,005098506 |
| 7,92E-04    | 0,014953713 |
| 7,32E-04    | 0,014224695 |
| 7,45E-04    | 0,014396277 |
| 1,27E-04    | 0,004691206 |
| 7,46E-04    | 0,014403052 |
| 0,004588642 | 0,045563188 |
| 0,004371554 | 0,044336631 |
| 0,003646055 | 0,039583206 |
| 2,84E-06    | 4,64E-04    |
| 6,44E-04    | 0,013101756 |
| 0,002233272 | 0,028985678 |
| 0,001436515 | 0,02193219  |
| 2,89E-04    | 0,007847427 |
| 0,004473109 | 0,044866059 |
| 6,14E-05    | 0,002941117 |
| 1,15E-04    | 0,004377714 |
| 0,002937731 | 0,034673627 |
| 6,77E-05    | 0,003106515 |

# Supplementary\_table\_S3

|             |             |
|-------------|-------------|
| 3,84E-05    | 0,002192026 |
| 0,003818724 | 0,04073306  |
| 8,77E-07    | 2,43E-04    |
| 9,41E-04    | 0,016836698 |
| 0,004581073 | 0,045521965 |
| 0,001807166 | 0,02518723  |
| 2,09E-04    | 0,006393518 |
| 0,001435426 | 0,021927172 |
| 1,52E-04    | 0,005270661 |
| 0,002308967 | 0,029673229 |
| 0,002129626 | 0,028069027 |
| 0,002512297 | 0,031313984 |
| 0,004258368 | 0,043795131 |
| 0,001449376 | 0,022032446 |
| 2,33E-06    | 0,000411684 |
| 4,65E-04    | 0,010662758 |
| 0,004223399 | 0,043586852 |
| 0,004142933 | 0,04316791  |
| 3,30E-07    | 1,39E-04    |
| 8,82E-05    | 0,003653999 |
| 4,83E-04    | 0,010938256 |
| 2,58E-05    | 0,00173298  |
| 0,002741238 | 0,033078498 |
| 0,002468992 | 0,030962498 |
| 0,002117673 | 0,027949521 |
| 0,002163618 | 0,028365037 |
| 1,63E-04    | 0,005463718 |
| 1,73E-05    | 0,001338065 |
| 0,003439322 | 0,038291557 |
| 3,54E-04    | 0,008954783 |
| 2,42E-05    | 0,00167025  |
| 0,002613343 | 0,032140027 |
| 0,001448215 | 0,022032446 |
| 0,00142118  | 0,021774239 |
| 0,003312189 | 0,037464683 |
| 6,05E-04    | 0,012581609 |
| 2,52E-04    | 0,007276255 |
| 0,004373742 | 0,044340892 |
| 9,98E-04    | 0,017438748 |
| 8,55E-05    | 0,003591706 |
| 0,002526703 | 0,031418958 |
| 0,003690818 | 0,039923211 |
| 0,003233403 | 0,036817156 |
| 0,004174631 | 0,043320001 |
| 0,003563268 | 0,039036452 |
| 0,002321323 | 0,029746753 |
| 5,64E-04    | 0,012069922 |
| 0,00137428  | 0,021314731 |
| 4,29E-04    | 0,010144675 |
| 1,56E-04    | 0,005322108 |
| 1,80E-05    | 0,001380111 |
| 8,34E-08    | 7,90E-05    |
| 6,92E-05    | 0,003155149 |

# Supplementary\_table\_S3

|             |             |
|-------------|-------------|
| 0,004425377 | 0,044644282 |
| 0,001974616 | 0,026613398 |
| 3,35E-05    | 0,001998978 |
| 0,003428285 | 0,038263473 |
| 1,05E-04    | 0,004110075 |
| 5,32E-05    | 0,002651813 |
| 0,003867073 | 0,041102541 |
| 0,004130166 | 0,043095368 |
| 1,29E-07    | 9,58E-05    |
| 0,0010749   | 0,018401362 |
| 0,003698942 | 0,039975681 |
| 1,53E-05    | 0,00124424  |
| 2,92E-04    | 0,007884729 |
| 8,22E-06    | 8,55E-04    |
| 0,001433712 | 0,021908494 |
| 6,51E-04    | 0,013212306 |
| 8,51E-05    | 0,003580622 |
| 1,76E-04    | 0,005735638 |
| 0,002015935 | 0,026950126 |
| 0,001647409 | 0,023775293 |
| 4,33E-04    | 0,010205018 |
| 0,002690359 | 0,032755865 |
| 0,002303625 | 0,029639706 |
| 5,07E-06    | 6,59E-04    |
| 0,004160657 | 0,043260875 |
| 7,38E-05    | 0,003280167 |
| 5,74E-04    | 0,012206185 |
| 4,18E-04    | 0,009992372 |
| 1,28E-05    | 0,001116061 |
| 0,001024751 | 0,017740587 |
| 0,002603448 | 0,032044208 |
| 0,003484273 | 0,038527525 |
| 7,45E-04    | 0,014401012 |
| 4,00E-04    | 0,009757706 |
| 0,001118534 | 0,018872719 |
| 6,63E-04    | 0,013370653 |
| 0,002702724 | 0,032844303 |
| 0,002729962 | 0,033037724 |
| 1,38E-04    | 0,004951133 |
| 7,90E-04    | 0,01493436  |
| 9,04E-05    | 0,003700939 |
| 0,001129241 | 0,018952869 |
| 0,005052523 | 0,048504221 |
| 1,56E-05    | 0,001265534 |
| 0,001834173 | 0,025373107 |
| 0,0037539   | 0,040292468 |
| 0,002656358 | 0,032472829 |
| 0,001762594 | 0,024809113 |
| 0,0012279   | 0,019940053 |
| 0,002341952 | 0,029921995 |
| 1,52E-04    | 0,005270661 |
| 0,001168599 | 0,019338557 |
| 0,00516502  | 0,049234032 |

# Supplementary\_table\_S3

|             |             |
|-------------|-------------|
| 0,001871942 | 0,025704006 |
| 0,004313506 | 0,044050124 |
| 0,001623839 | 0,02359944  |
| 2,98E-04    | 0,008006245 |
| 5,98E-05    | 0,002884243 |
| 2,00E-04    | 0,00621794  |
| 7,07E-05    | 0,003197124 |
| 0,001805835 | 0,025184451 |
| 0,00181512  | 0,025258577 |
| 1,58E-04    | 0,005379686 |
| 0,004430953 | 0,044644282 |
| 0,003780676 | 0,040424009 |
| 0,001468178 | 0,022199084 |
| 4,44E-06    | 6,04E-04    |
| 6,09E-04    | 0,012641815 |
| 2,81E-07    | 1,25E-04    |
| 0,00350447  | 0,038620723 |
| 0,00215379  | 0,028317129 |
| 7,30E-04    | 0,014205812 |
| 5,82E-04    | 0,012279129 |
| 0,001400295 | 0,021539802 |
| 1,92E-04    | 0,006043514 |
| 1,07E-04    | 0,004163076 |
| 9,95E-06    | 9,59E-04    |
| 0,001666402 | 0,023921437 |
| 0,004843306 | 0,047043223 |
| 3,20E-04    | 0,008384205 |
| 0,001138829 | 0,019042637 |
| 1,22E-04    | 0,004562111 |
| 0,002920703 | 0,034552428 |
| 2,67E-05    | 0,001764845 |
| 2,19E-04    | 0,006591427 |
| 0,003449521 | 0,038337186 |
| 5,83E-06    | 7,20E-04    |
| 6,11E-05    | 0,002932428 |
| 0,002876548 | 0,034207985 |
| 0,001006541 | 0,01754809  |
| 1,44E-04    | 0,005077801 |
| 0,002378078 | 0,030205047 |
| 1,55E-04    | 0,005322108 |
| 2,98E-05    | 0,001883356 |
| 0,002006623 | 0,026874612 |
| 0,001687224 | 0,024111551 |
| 0,004079883 | 0,042750956 |
| 0,001168718 | 0,019338557 |
| 4,31E-05    | 0,002354334 |
| 0,001817745 | 0,025263805 |
| 0,00501025  | 0,048222952 |
| 0,002918872 | 0,034542571 |
| 4,10E-06    | 5,82E-04    |
| 8,54E-04    | 0,015726012 |
| 0,003737276 | 0,040191506 |
| 0,004153012 | 0,043222377 |

# Supplementary\_table\_S3

|             |             |
|-------------|-------------|
| 6,33E-06    | 7,54E-04    |
| 0,001164321 | 0,019303069 |
| 3,36E-04    | 0,008626328 |
| 3,77E-05    | 0,002167711 |
| 7,20E-04    | 0,014075675 |
| 0,004276756 | 0,043925254 |
| 1,31E-04    | 0,004774047 |
| 0,004227371 | 0,043598989 |
| 0,001251342 | 0,02015177  |
| 1,15E-05    | 0,001037438 |
| 2,73E-05    | 0,001793417 |
| 5,38E-04    | 0,011786355 |
| 0,000176947 | 0,005757422 |
| 0,002243521 | 0,029101749 |
| 0,001593616 | 0,023333191 |
| 0,002082177 | 0,027636613 |
| 1,84E-08    | 4,10E-05    |
| 1,75E-04    | 0,005718737 |
| 3,27E-04    | 0,008488641 |
| 7,09E-06    | 7,98E-04    |
| 2,90E-04    | 0,007855215 |
| 0,001593827 | 0,023333191 |
| 0,003333113 | 0,037586179 |
| 0,002462247 | 0,030930157 |
| 4,26E-04    | 0,010101098 |
| 1,39E-04    | 0,004974003 |
| 4,96E-08    | 5,81E-05    |
| 0,00500797  | 0,048222011 |
| 1,98E-04    | 0,006182214 |
| 0,00461524  | 0,045669692 |
| 0,004218778 | 0,043551851 |
| 0,001794231 | 0,025061851 |
| 2,64E-05    | 0,001757859 |
| 3,38E-06    | 5,13E-04    |
| 0,001228788 | 0,019940761 |
| 3,57E-05    | 0,002082716 |
| 1,59E-04    | 0,005386936 |
| 3,25E-04    | 0,008477337 |
| 1,50E-06    | 3,40E-04    |
| 1,55E-06    | 3,40E-04    |
| 0,003468434 | 0,038466303 |
| 0,00257209  | 0,03176919  |
| 0,001894968 | 0,02590398  |
| 1,17E-04    | 0,004418184 |
| 3,75E-04    | 0,009304035 |
| 1,68E-04    | 0,005564865 |
| 7,13E-04    | 0,013975994 |
| 2,69E-08    | 5,25E-05    |
| 7,35E-05    | 0,003273769 |
| 4,16E-04    | 0,009985253 |
| 8,09E-04    | 0,015169896 |
| 0,00169456  | 0,02419311  |
| 1,39E-07    | 1,01E-04    |

# Supplementary\_table\_S3

|             |             |
|-------------|-------------|
| 2,23E-04    | 0,006680424 |
| 0,00197795  | 0,026629479 |
| 0,002555552 | 0,031637634 |
| 0,005229196 | 0,04957882  |
| 4,82E-04    | 0,010938256 |
| 1,92E-04    | 0,006043514 |
| 3,61E-04    | 0,009040081 |
| 9,67E-05    | 0,003903316 |
| 6,14E-06    | 7,39E-04    |
| 7,31E-04    | 0,01421294  |
| 3,45E-06    | 5,19E-04    |
| 4,93E-05    | 0,002534058 |
| 7,82E-04    | 0,014830676 |
| 0,003560774 | 0,039036452 |
| 0,001218015 | 0,019839004 |
| 0,005011612 | 0,048222952 |
| 3,87E-04    | 0,009532953 |
| 2,27E-07    | 1,19E-04    |
| 0,003417358 | 0,03822436  |
| 4,01E-04    | 0,009759681 |
| 0,004763893 | 0,046545917 |
| 9,28E-04    | 0,016717931 |
| 0,002322961 | 0,029746753 |
| 0,002060608 | 0,027415694 |
| 5,61E-05    | 0,002759222 |
| 2,00E-06    | 3,76E-04    |
| 2,62E-04    | 0,007450983 |
| 1,17E-04    | 0,004416739 |
| 0,003427559 | 0,038263473 |
| 4,11E-06    | 5,82E-04    |
| 2,10E-04    | 0,006411917 |
| 0,002803932 | 0,033583853 |
| 2,03E-05    | 0,001507424 |
| 7,55E-04    | 0,01451881  |
| 6,42E-04    | 0,013101756 |
| 0,001924899 | 0,026172987 |
| 2,15E-04    | 0,006519425 |
| 7,38E-05    | 0,003280167 |
| 4,03E-04    | 0,009804907 |
| 5,76E-04    | 0,012214826 |
| 1,79E-04    | 0,005797805 |
| 0,002799246 | 0,033572859 |
| 3,59E-04    | 0,009018869 |
| 4,15E-04    | 0,00997453  |
| 4,41E-04    | 0,010291188 |
| 1,03E-04    | 0,004085683 |
| 4,37E-05    | 0,002371746 |
| 1,75E-04    | 0,005718737 |
| 7,72E-04    | 0,014727512 |
| 5,54E-06    | 6,97E-04    |
| 3,41E-05    | 0,002032448 |
| 0,001442196 | 0,021977819 |
| 2,13E-04    | 0,006473832 |



# Supplementary\_table\_S3

|             |             |
|-------------|-------------|
| 9,63E-04    | 0,017063875 |
| 1,98E-05    | 0,001481202 |
| 0,003950175 | 0,041767024 |
| 0,002898249 | 0,03438429  |
| 0,004539838 | 0,045260189 |
| 3,58E-04    | 0,009013238 |
| 0,003484828 | 0,038527525 |
| 0,00483242  | 0,047019514 |
| 3,06E-04    | 0,008148423 |
| 9,83E-04    | 0,017295325 |
| 5,73E-04    | 0,01220151  |
| 0,001622552 | 0,023596133 |
| 0,002562319 | 0,031686822 |
| 0,002400854 | 0,030424927 |
| 7,20E-04    | 0,014075384 |
| 0,001601219 | 0,023409897 |
| 0,001418805 | 0,021747848 |
| 5,50E-04    | 0,011952792 |
| 0,002729074 | 0,033037724 |
| 1,34E-05    | 0,001151746 |
| 2,26E-05    | 0,00159964  |
| 2,99E-05    | 0,001883356 |
| 0,001926807 | 0,02618295  |
| 0,003224338 | 0,036754061 |
| 5,42E-05    | 0,002685163 |
| 7,56E-04    | 0,014526523 |
| 5,90E-04    | 0,012379986 |
| 6,33E-04    | 0,012983688 |
| 6,00E-04    | 0,012516413 |
| 0,003622899 | 0,039466469 |
| 8,77E-05    | 0,00364231  |
| 1,20E-04    | 0,004519526 |
| 2,94E-04    | 0,007923834 |
| 0,004126821 | 0,043080646 |
| 3,66E-04    | 0,009122502 |
| 3,11E-05    | 0,001929977 |
| 0,001274281 | 0,020373852 |
| 0,004659052 | 0,045924498 |
| 0,005073948 | 0,048678429 |
| 0,004260502 | 0,043795131 |
| 0,001274276 | 0,020373852 |
| 9,99E-05    | 0,004003347 |
| 2,98E-04    | 0,008010879 |
| 0,002570084 | 0,031756406 |
| 1,66E-05    | 0,001297315 |
| 0,001615248 | 0,023536014 |
| 5,69E-04    | 0,012160583 |
| 2,77E-04    | 0,007697044 |
| 1,65E-06    | 3,53E-04    |
| 1,79E-04    | 0,005792816 |
| 9,84E-04    | 0,017302304 |
| 7,10E-05    | 0,003200508 |
| 0,001030134 | 0,017792285 |

# Supplementary\_table\_S3

|             |             |
|-------------|-------------|
| 2,79E-05    | 0,001821904 |
| 0,003588086 | 0,039221525 |
| 0,004301848 | 0,044022306 |
| 0,004955543 | 0,047885375 |
| 4,55E-05    | 0,002418132 |
| 0,004531617 | 0,045214564 |
| 2,34E-04    | 0,006878806 |
| 0,001103927 | 0,018761291 |
| 0,004454047 | 0,044763926 |
| 3,47E-04    | 0,008824545 |
| 1,20E-04    | 0,004520192 |
| 0,003955894 | 0,041805776 |
| 3,42E-04    | 0,008746876 |
| 0,003618586 | 0,03944843  |
| 0,001337929 | 0,020969983 |
| 5,16E-05    | 0,002595405 |
| 4,07E-05    | 0,002284185 |
| 0,001099897 | 0,018714212 |
| 0,001786904 | 0,025021877 |
| 0,001695187 | 0,024194301 |
| 9,97E-04    | 0,017434949 |
| 0,003482857 | 0,038527525 |
| 0,005243397 | 0,049672876 |
| 6,83E-04    | 0,013641033 |
| 0,002724099 | 0,033009317 |
| 0,001124467 | 0,0189374   |
| 2,43E-04    | 0,007086625 |
| 0,002009658 | 0,026898495 |
| 0,001352036 | 0,021139027 |
| 0,004617131 | 0,045669692 |
| 6,40E-04    | 0,013081285 |
| 0,004286398 | 0,043985926 |
| 0,002795334 | 0,033544009 |
| 3,83E-04    | 0,009456708 |
| 1,02E-05    | 9,73E-04    |
| 2,32E-06    | 0,000411684 |
| 3,07E-06    | 4,88E-04    |
| 0,004189129 | 0,04339548  |
| 4,66E-05    | 0,002454062 |
| 2,96E-07    | 1,27E-04    |
| 1,08E-04    | 0,004178917 |
| 0,002546768 | 0,031582189 |
| 0,00353233  | 0,038821639 |
| 4,16E-04    | 0,009989073 |
| 2,53E-04    | 0,007297007 |
| 0,001960931 | 0,026502441 |
| 3,65E-04    | 0,009109573 |
| 9,94E-04    | 0,017403249 |
| 0,001735166 | 0,024590606 |
| 8,79E-06    | 8,83E-04    |
| 0,005213184 | 0,049523578 |
| 3,50E-04    | 0,008889481 |
| 0,004818276 | 0,04690304  |

# Supplementary\_table\_S3

|             |             |
|-------------|-------------|
| 0,004060879 | 0,042642106 |
| 0,001784091 | 0,025021877 |
| 6,02E-04    | 0,01255853  |
| 4,37E-04    | 0,010251693 |
| 2,53E-05    | 0,001707921 |
| 0,003826579 | 0,040797302 |
| 6,37E-04    | 0,013027684 |
| 4,01E-04    | 0,009759681 |
| 0,001689473 | 0,024135954 |
| 1,46E-04    | 0,005110857 |
| 0,001374013 | 0,021314731 |
| 1,34E-04    | 0,004847912 |
| 9,40E-05    | 0,003816287 |
| 0,001535075 | 0,02279192  |
| 8,08E-05    | 0,00347139  |
| 8,99E-04    | 0,016302792 |
| 0,004429547 | 0,044644282 |
| 0,001632114 | 0,023665653 |
| 0,001308751 | 0,020716799 |
| 0,002535093 | 0,031490015 |
| 1,41E-04    | 0,004993368 |
| 0,002821137 | 0,033717389 |
| 1,57E-05    | 0,001270376 |
| 0,004576648 | 0,045521965 |
| 5,58E-04    | 0,0120336   |
| 4,52E-05    | 0,002410418 |
| 0,00188476  | 0,025824284 |
| 2,07E-04    | 0,006360711 |
| 9,68E-04    | 0,017088492 |
| 4,64E-04    | 0,010648788 |
| 4,18E-04    | 0,009992372 |
| 2,24E-04    | 0,006686662 |
| 7,18E-04    | 0,014053956 |
| 0,001202405 | 0,019655014 |
| 0,001317733 | 0,020768119 |
| 4,88E-04    | 0,011028096 |
| 1,84E-06    | 3,66E-04    |
| 2,31E-05    | 0,001621293 |
| 9,48E-04    | 0,016890477 |
| 0,003228135 | 0,036775973 |
| 3,97E-05    | 0,002253253 |
| 9,27E-07    | 2,51E-04    |
| 0,005079816 | 0,04872423  |
| 0,00461805  | 0,045669692 |
| 0,003417915 | 0,03822436  |
| 0,003341363 | 0,037613762 |
| 0,001964659 | 0,026535403 |
| 1,44E-05    | 0,001208197 |
| 0,001144639 | 0,01909618  |
| 1,09E-04    | 0,004200343 |
| 0,00146508  | 0,022178925 |
| 9,12E-04    | 0,016497282 |
| 3,07E-05    | 0,001919648 |

# Supplementary\_table\_S3

|             |             |
|-------------|-------------|
| 0,003978452 | 0,041964524 |
| 0,003073488 | 0,035615356 |
| 0,004708264 | 0,046256047 |
| 0,00327033  | 0,037161631 |
| 0,00467802  | 0,046029983 |
| 0,001026637 | 0,017760055 |
| 9,88E-04    | 0,017336748 |
| 9,18E-04    | 0,016573771 |
| 1,64E-04    | 0,005488906 |
| 1,12E-05    | 0,0010264   |
| 0,002711949 | 0,032924787 |
| 3,69E-05    | 0,002124084 |
| 0,001709126 | 0,02435422  |
| 0,003470637 | 0,038466303 |
| 0,001202265 | 0,019655014 |
| 5,03E-06    | 6,56E-04    |
| 2,74E-04    | 0,007634833 |
| 4,22E-04    | 0,010048386 |
| 2,90E-05    | 0,001866567 |
| 0,001186487 | 0,019538685 |
| 7,83E-06    | 8,29E-04    |
| 7,01E-04    | 0,013816656 |
| 4,09E-04    | 0,00988419  |
| 0,001190313 | 0,019579511 |
| 6,71E-04    | 0,013489501 |
| 0,001829325 | 0,025345402 |
| 0,003154369 | 0,036185484 |
| 1,79E-04    | 0,005799286 |
| 0,001238609 | 0,020036162 |
| 0,0037174   | 0,040089514 |
| 2,72E-04    | 0,007617476 |
| 6,30E-04    | 0,012932089 |
| 7,79E-04    | 0,01478302  |
| 1,36E-04    | 0,004905178 |
| 5,02E-05    | 0,002559682 |
| 8,23E-04    | 0,015353242 |
| 6,53E-06    | 7,62E-04    |
| 0,003255606 | 0,03702265  |
| 0,005187791 | 0,049366577 |
| 0,002006667 | 0,026874612 |
| 0,001523529 | 0,022734408 |
| 1,27E-05    | 0,001115057 |
| 0,001151597 | 0,019176536 |
| 1,58E-05    | 0,001271059 |
| 8,20E-04    | 0,015322631 |
| 0,001949545 | 0,026401073 |
| 1,18E-05    | 0,001061429 |
| 2,11E-05    | 0,00154523  |
| 2,66E-04    | 0,007518484 |
| 2,24E-04    | 0,006689908 |
| 0,001607892 | 0,023451846 |
| 4,51E-04    | 0,010459831 |
| 0,003593761 | 0,039264289 |

# Supplementary\_table\_S3

|             |             |
|-------------|-------------|
| 6,88E-04    | 0,013684083 |
| 3,47E-04    | 0,008833663 |
| 6,18E-04    | 0,012741219 |
| 0,003997178 | 0,042112182 |
| 7,21E-04    | 0,014080753 |
| 2,31E-06    | 0,000411684 |
| 6,14E-04    | 0,012676115 |
| 8,65E-04    | 0,015860623 |
| 0,002422275 | 0,030600633 |
| 0,002008868 | 0,026896004 |
| 0,002359225 | 0,030056421 |
| 0,002365941 | 0,030106589 |
| 0,004963778 | 0,04790003  |
| 3,93E-04    | 0,009655384 |
| 0,002111168 | 0,027880183 |
| 0,001371182 | 0,021303779 |
| 0,001830407 | 0,025352507 |
| 0,003723081 | 0,040114248 |
| 0,005118786 | 0,048950456 |
| 0,004579993 | 0,045521965 |
| 0,001979174 | 0,026634533 |
| 3,38E-04    | 0,008677538 |
| 0,00108942  | 0,018560672 |
| 9,97E-04    | 0,017433268 |
| 6,90E-05    | 0,003150412 |
| 3,15E-04    | 0,008303463 |
| 0,005041331 | 0,048445384 |
| 0,00331075  | 0,037458868 |
| 4,54E-04    | 0,010499577 |
| 6,48E-06    | 7,62E-04    |
| 0,001395015 | 0,021516466 |
| 0,004966759 | 0,047908361 |
| 8,64E-07    | 2,43E-04    |
| 8,87E-04    | 0,016145962 |
| 2,97E-04    | 0,008005569 |
| 0,001519056 | 0,022698709 |
| 0,00528002  | 0,049924262 |
| 0,002639673 | 0,032365309 |
| 4,51E-05    | 0,002410418 |
| 0,001734831 | 0,024590606 |
| 0,001922085 | 0,026150688 |
| 1,46E-05    | 0,001214474 |
| 0,00151315  | 0,022629764 |
| 2,04E-04    | 0,006298026 |
| 0,001964294 | 0,026535403 |
| 4,75E-04    | 0,010812604 |
| 0,002310686 | 0,029673229 |
| 0,001709082 | 0,02435422  |
| 3,63E-04    | 0,009093356 |
| 0,002937096 | 0,034673627 |
| 9,11E-04    | 0,016485881 |
| 4,12E-05    | 0,002295678 |
| 9,78E-04    | 0,017228877 |

# Supplementary\_table\_S3

|             |             |
|-------------|-------------|
| 0,001149034 | 0,019155156 |
| 6,75E-04    | 0,013511038 |
| 4,90E-05    | 0,002527132 |
| 0,003211448 | 0,03664209  |
| 1,59E-05    | 0,001271059 |
| 0,002729878 | 0,033037724 |
| 2,75E-04    | 0,007651372 |
| 0,00226081  | 0,029273677 |
| 7,18E-05    | 0,003220404 |
| 0,004672099 | 0,045981879 |
| 0,001297472 | 0,020648298 |
| 0,001305084 | 0,020687854 |
| 9,51E-04    | 0,016928334 |
| 7,30E-04    | 0,014205812 |
| 7,42E-04    | 0,014366294 |
| 7,02E-04    | 0,013825838 |
| 0,002778278 | 0,033375307 |
| 5,18E-04    | 0,011520963 |
| 0,004885974 | 0,047385332 |
| 4,18E-04    | 0,009992372 |
| 0,001310214 | 0,020722957 |
| 0,002203728 | 0,028736201 |
| 0,002472473 | 0,030994418 |
| 0,004336636 | 0,044125511 |
| 4,25E-04    | 0,010084929 |
| 8,77E-04    | 0,016034867 |
| 0,003435788 | 0,038291557 |
| 7,17E-05    | 0,003220404 |
| 1,82E-05    | 0,001392836 |
| 0,002770024 | 0,033294102 |
| 0,001138159 | 0,019042637 |
| 1,24E-04    | 0,004612877 |
| 2,14E-04    | 0,006512592 |
| 4,67E-04    | 0,010690728 |
| 9,58E-04    | 0,016998476 |
| 2,06E-04    | 0,00635911  |
| 0,002385045 | 0,030267654 |
| 1,22E-05    | 0,001083856 |
| 0,002366344 | 0,030106589 |
| 0,004962154 | 0,04790003  |
| 9,28E-04    | 0,016717931 |
| 3,51E-04    | 0,008905894 |
| 0,004812789 | 0,046900214 |
| 7,91E-04    | 0,014950988 |
| 0,004605579 | 0,045629652 |
| 0,00231034  | 0,029673229 |
| 0,001750989 | 0,024711688 |
| 4,24E-04    | 0,010084929 |
| 0,004584029 | 0,045536162 |
| 5,60E-04    | 0,012055378 |
| 2,86E-04    | 0,007769726 |
| 3,24E-05    | 0,001970335 |
| 0,002257788 | 0,029252731 |

# Supplementary\_table\_S3

|             |             |
|-------------|-------------|
| 0,004182384 | 0,043345768 |
| 1,87E-04    | 0,005969942 |
| 1,02E-04    | 0,004076022 |
| 0,002953991 | 0,034782604 |
| 0,001183878 | 0,019524128 |
| 0,002273984 | 0,029385655 |
| 0,005138642 | 0,049077118 |
| 0,004323929 | 0,044057139 |
| 0,004252371 | 0,043766556 |
| 7,23E-07    | 2,30E-04    |
| 2,71E-04    | 0,007609606 |
| 0,001147607 | 0,01913852  |
| 5,32E-04    | 0,011721604 |
| 0,003780447 | 0,040424009 |
| 0,001317138 | 0,020768119 |
| 0,002296618 | 0,029566639 |
| 0,002173127 | 0,028470518 |
| 4,80E-05    | 0,002485274 |
| 4,03E-04    | 0,009799538 |
| 0,001783984 | 0,025021877 |
| 0,005160684 | 0,049204246 |
| 3,55E-04    | 0,008975952 |
| 0,001362328 | 0,021224826 |
| 1,04E-04    | 0,004095153 |
| 5,22E-04    | 0,011582641 |
| 0,004915752 | 0,047632641 |
| 2,73E-04    | 0,00762624  |
| 4,82E-06    | 6,42E-04    |
| 0,002843843 | 0,033906886 |
| 0,001401335 | 0,021546795 |
| 0,001022214 | 0,017724208 |
| 0,002647499 | 0,032398409 |
| 0,003128185 | 0,036014957 |
| 3,37E-04    | 0,008663696 |
| 4,89E-05    | 0,002526561 |
| 0,005092308 | 0,048781028 |
| 0,0015829   | 0,0232544   |
| 1,30E-04    | 0,004770434 |
| 0,001908108 | 0,026024114 |
| 0,001996896 | 0,02679967  |
| 0,003317504 | 0,037481244 |
| 0,005248581 | 0,049690921 |
| 0,004117632 | 0,043028072 |
| 0,001686204 | 0,024104704 |
| 0,002436867 | 0,030715287 |
| 0,001359855 | 0,021216589 |
| 3,30E-04    | 0,00852095  |
| 1,97E-04    | 0,006161377 |
| 0,005067902 | 0,048630898 |
| 0,001066196 | 0,018294399 |
| 8,11E-04    | 0,015200244 |
| 9,59E-05    | 0,0038798   |
| 7,15E-04    | 0,014009871 |

# Supplementary\_table\_S3

|             |             |
|-------------|-------------|
| 1,30E-04    | 0,004770434 |
| 0,00346016  | 0,038426674 |
| 0,001014626 | 0,017640707 |
| 0,003152875 | 0,036178889 |
| 0,001602754 | 0,02342293  |
| 0,002405787 | 0,030470105 |
| 0,004497982 | 0,045014181 |
| 6,08E-04    | 0,012639164 |
| 1,56E-06    | 3,40E-04    |
| 1,06E-04    | 0,00412822  |
| 2,99E-06    | 4,82E-04    |
| 1,29E-04    | 0,00474455  |
| 0,002509977 | 0,031300605 |
| 0,0024185   | 0,030578951 |
| 5,63E-04    | 0,012069922 |
| 7,86E-04    | 0,014882775 |
| 0,003200511 | 0,036573513 |
| 3,81E-05    | 0,002179315 |
| 0,004327539 | 0,044070848 |
| 0,003477981 | 0,03851823  |
| 0,001400191 | 0,021539802 |
| 2,68E-04    | 0,00757574  |
| 3,10E-04    | 0,008216898 |
| 2,53E-04    | 0,007298502 |
| 4,08E-05    | 0,002285797 |
| 0,001258771 | 0,020240478 |
| 0,00299964  | 0,035088221 |
| 0,003518037 | 0,038712308 |
| 1,06E-04    | 0,004139016 |
| 2,15E-04    | 0,006519425 |
| 0,002426538 | 0,030619749 |
| 6,46E-04    | 0,013149017 |
| 0,004963521 | 0,04790003  |
| 3,62E-05    | 0,002091933 |
| 0,001603878 | 0,023426388 |
| 0,001610623 | 0,023481426 |
| 0,001985576 | 0,026677878 |
| 0,004600117 | 0,045625713 |
| 0,004085772 | 0,042792531 |
| 4,14E-04    | 0,009972409 |
| 0,001262035 | 0,020265359 |
| 0,002390545 | 0,030327004 |
| 5,95E-04    | 0,012448848 |
| 0,001907995 | 0,026024114 |
| 5,64E-04    | 0,012069922 |
| 0,002434281 | 0,030691371 |
| 0,001644763 | 0,023775293 |
| 0,003494817 | 0,0385807   |
| 0,003625352 | 0,039470296 |
| 0,002037343 | 0,027162949 |
| 0,004950755 | 0,047870248 |
| 2,98E-04    | 0,008012556 |
| 5,79E-04    | 0,012245694 |



# Supplementary\_table\_S3

|             |             |
|-------------|-------------|
| 0,003795443 | 0,040527535 |
| 0,004409734 | 0,044526934 |
| 0,002892702 | 0,034333201 |
| 9,65E-04    | 0,017065388 |
| 5,58E-04    | 0,012038809 |
| 1,62E-04    | 0,005437884 |
| 0,001044783 | 0,017996454 |
| 0,001363164 | 0,021224826 |
| 0,000556966 | 0,012025919 |
| 0,003353326 | 0,037710316 |
| 3,44E-04    | 0,008779164 |
| 9,34E-04    | 0,016784777 |
| 5,01E-04    | 0,011267972 |
| 0,00309085  | 0,03572362  |
| 0,00107192  | 0,018357401 |
| 2,37E-04    | 0,006957223 |
| 0,004300157 | 0,044022306 |
| 0,003465588 | 0,038466303 |
| 0,003730133 | 0,040148235 |
| 2,49E-05    | 0,001693963 |
| 2,18E-06    | 3,97E-04    |
| 8,36E-05    | 0,003536734 |
| 0,001184723 | 0,019530823 |
| 6,35E-05    | 0,003004509 |
| 7,67E-04    | 0,014672831 |
| 5,41E-04    | 0,011834327 |
| 0,003962551 | 0,041863512 |
| 0,001537022 | 0,02279891  |
| 0,001422212 | 0,021774239 |
| 0,003377351 | 0,037894385 |
| 5,78E-05    | 0,00281815  |
| 6,26E-05    | 0,002969723 |
| 0,004147962 | 0,043200097 |
| 0,001763761 | 0,02481521  |
| 0,004697186 | 0,046177768 |
| 8,97E-04    | 0,016261879 |
| 0,003392849 | 0,038029959 |
| 4,14E-05    | 0,002295678 |
| 3,57E-04    | 0,008998966 |
| 0,002815719 | 0,033688795 |
| 0,00202037  | 0,026977021 |
| 0,001115676 | 0,018831632 |
| 0,002344373 | 0,029921995 |
| 0,003133677 | 0,036040925 |
| 6,00E-04    | 0,012513933 |
| 0,001575852 | 0,023181892 |
| 9,34E-04    | 0,016784777 |
| 0,003274929 | 0,037204392 |
| 2,12E-04    | 0,006473832 |
| 2,10E-04    | 0,006411917 |
| 7,77E-04    | 0,014772651 |
| 0,003684607 | 0,039885092 |
| 1,91E-04    | 0,006024593 |

# Supplementary\_table\_S3

|             |             |
|-------------|-------------|
| 0,003558229 | 0,039019636 |
| 4,28E-06    | 5,92E-04    |
| 5,92E-04    | 0,012401212 |
| 0,001524883 | 0,022734408 |
| 6,24E-04    | 0,012836055 |
| 0,003492988 | 0,038570065 |
| 0,002661247 | 0,032495221 |
| 4,63E-05    | 0,002438348 |
| 0,004293107 | 0,044012005 |
| 6,85E-04    | 0,013662559 |
| 0,002091399 | 0,027698834 |
| 0,004079181 | 0,042750956 |
| 0,002834182 | 0,033832436 |
| 0,004389934 | 0,044432451 |
| 0,001066598 | 0,018294399 |
| 0,001977319 | 0,026629479 |
| 9,14E-04    | 0,016525274 |
| 0,001931841 | 0,026227345 |
| 2,56E-04    | 0,007369432 |
| 0,001134126 | 0,018999057 |
| 0,001170508 | 0,019360979 |
| 0,002031777 | 0,027112609 |
| 0,005209778 | 0,049512338 |
| 4,41E-05    | 0,002382911 |
| 5,65E-05    | 0,002769697 |
| 0,003367941 | 0,037807857 |
| 0,005097642 | 0,048800639 |
| 5,99E-04    | 0,012507238 |
| 3,86E-05    | 0,00219759  |
| 0,001835582 | 0,025384717 |
| 0,00147767  | 0,022274557 |
| 2,39E-05    | 0,001656458 |
| 6,55E-04    | 0,013279859 |
| 0,003511741 | 0,038661921 |
| 3,74E-05    | 0,002150716 |
| 1,72E-06    | 3,58E-04    |
| 1,08E-04    | 0,004167086 |
| 0,004289657 | 0,04398676  |
| 2,45E-05    | 0,001676124 |
| 5,61E-04    | 0,012058374 |
| 2,14E-04    | 0,006504651 |
| 1,95E-04    | 0,006103403 |
| 0,004236065 | 0,043644536 |
| 0,001634646 | 0,023694657 |
| 0,001836497 | 0,025389482 |
| 0,004230685 | 0,043619232 |
| 3,97E-04    | 0,009705451 |
| 5,26E-04    | 0,011623799 |
| 0,003486236 | 0,038527525 |
| 0,001585212 | 0,02326732  |
| 6,05E-04    | 0,012583736 |
| 0,001843932 | 0,025468558 |
| 2,72E-04    | 0,00761885  |

# Supplementary\_table\_S3

|             |             |
|-------------|-------------|
| 0,003999178 | 0,042123287 |
| 1,27E-04    | 0,004691206 |
| 0,00475809  | 0,046530153 |
| 0,0042999   | 0,044022306 |
| 0,001981227 | 0,026646067 |
| 5,40E-04    | 0,011807297 |
| 0,002881596 | 0,03423788  |
| 0,004310379 | 0,044050124 |
| 1,13E-05    | 0,0010264   |
| 0,004302688 | 0,044022306 |
| 0,001997986 | 0,02679967  |
| 2,68E-04    | 0,007573075 |
| 6,78E-07    | 2,26E-04    |
| 0,003850067 | 0,04099866  |
| 8,51E-04    | 0,015668624 |
| 0,004455892 | 0,044763926 |
| 3,26E-04    | 0,008477337 |
| 8,16E-04    | 0,015268608 |
| 0,001265258 | 0,020273251 |
| 7,49E-04    | 0,014450483 |
| 1,55E-04    | 0,005321469 |
| 0,003052302 | 0,0355177   |
| 7,09E-04    | 0,013915804 |
| 5,49E-04    | 0,011948678 |
| 0,00350033  | 0,038612848 |
| 7,58E-04    | 0,014543309 |
| 0,004150836 | 0,043219923 |
| 0,001658253 | 0,023842872 |
| 0,002391084 | 0,030327004 |
| 0,005215726 | 0,049537166 |
| 2,49E-04    | 0,007213766 |
| 7,71E-05    | 0,00337013  |
| 0,004136314 | 0,04312921  |
| 7,86E-04    | 0,014882775 |
| 5,50E-06    | 6,94E-04    |
| 2,49E-04    | 0,007213766 |
| 0,001551638 | 0,022939322 |
| 5,91E-04    | 0,012391163 |
| 0,001049508 | 0,018056885 |
| 0,001023519 | 0,017728772 |
| 6,11E-05    | 0,002932428 |
| 0,005172451 | 0,049283773 |
| 0,001526491 | 0,022741149 |
| 1,60E-04    | 0,005400576 |
| 0,00433404  | 0,044125511 |
| 0,005179839 | 0,049322516 |
| 0,001304937 | 0,020687854 |
| 4,39E-04    | 0,010291188 |
| 1,52E-04    | 0,005270661 |
| 0,001585677 | 0,02326732  |
| 0,001931556 | 0,026227345 |
| 0,003026379 | 0,035317539 |
| 3,33E-04    | 0,008570208 |

# Supplementary\_table\_S3

|             |             |
|-------------|-------------|
| 0,001390525 | 0,021484405 |
| 4,25E-04    | 0,010088567 |
| 9,38E-04    | 0,016823018 |
| 0,004323681 | 0,044057139 |
| 0,001946724 | 0,02637313  |
| 4,71E-05    | 0,002458825 |
| 0,001793954 | 0,025061851 |
| 0,003445401 | 0,038329654 |
| 8,12E-04    | 0,01520184  |
| 0,001682264 | 0,024063833 |
| 0,003672726 | 0,039785485 |
| 3,00E-04    | 0,008040175 |
| 5,27E-04    | 0,011631738 |
| 8,83E-04    | 0,016091292 |
| 2,91E-04    | 0,00787259  |
| 0,004978757 | 0,047988148 |
| 0,001076964 | 0,018422534 |
| 0,001942251 | 0,026336862 |
| 7,96E-04    | 0,014994559 |
| 0,004622195 | 0,045689369 |
| 4,39E-04    | 0,010291188 |
| 0,004100242 | 0,042883582 |
| 0,001107065 | 0,018771646 |
| 0,001489719 | 0,022387997 |
| 0,004166227 | 0,043268926 |
| 5,25E-04    | 0,01161901  |
| 0,005275096 | 0,049909489 |
| 0,002699773 | 0,03283065  |
| 0,004276709 | 0,043925254 |
| 4,26E-05    | 0,002334633 |
| 0,004152656 | 0,043222377 |
| 0,001627889 | 0,023642872 |
| 0,001373294 | 0,021314731 |
| 2,59E-04    | 0,007413927 |
| 8,24E-04    | 0,015357341 |
| 8,43E-04    | 0,015594173 |
| 0,001128818 | 0,018952869 |
| 4,83E-04    | 0,010945766 |
| 0,002975949 | 0,03490276  |
| 2,90E-04    | 0,007855215 |
| 5,34E-04    | 0,011749934 |
| 5,13E-06    | 6,62E-04    |
| 9,17E-05    | 0,003739465 |
| 4,34E-04    | 0,010215739 |
| 0,001626638 | 0,023632412 |
| 0,002697419 | 0,032810988 |
| 0,001164387 | 0,019303069 |
| 0,004310581 | 0,044050124 |
| 0,00186114  | 0,025603035 |
| 0,002945843 | 0,034740424 |
| 0,004408803 | 0,044526934 |
| 0,001159054 | 0,019250152 |
| 0,00495581  | 0,047885375 |

# Supplementary\_table\_S3

|             |             |
|-------------|-------------|
| 2,90E-06    | 4,70E-04    |
| 0,004728229 | 0,046324648 |
| 0,004972304 | 0,047951138 |
| 0,001307468 | 0,020711193 |
| 0,003753563 | 0,040292468 |
| 0,003620916 | 0,039454522 |
| 2,80E-04    | 0,007735047 |
| 0,004040084 | 0,042481132 |
| 0,001903469 | 0,025976754 |
| 3,75E-04    | 0,009305519 |
| 8,28E-04    | 0,01538217  |
| 0,004520762 | 0,045144306 |
| 3,08E-04    | 0,008176057 |
| 0,001583392 | 0,0232544   |
| 7,01E-04    | 0,013813889 |
| 0,002380755 | 0,030221812 |
| 0,003687131 | 0,039893015 |
| 0,002322259 | 0,029746753 |
| 0,002377126 | 0,030201568 |
| 0,002960971 | 0,034837167 |
| 0,002792675 | 0,033521135 |
| 0,001469198 | 0,022199283 |
| 0,003619602 | 0,039449849 |
| 0,003306751 | 0,037456486 |
| 1,56E-04    | 0,005322108 |
| 0,002089675 | 0,027694876 |
| 1,37E-04    | 0,004938084 |
| 6,21E-04    | 0,012795968 |
| 2,82E-04    | 0,007759204 |
| 0,002143386 | 0,028213653 |
| 0,003174403 | 0,036331092 |
| 0,001084318 | 0,018505696 |
| 0,003410563 | 0,038170886 |
| 0,002394399 | 0,030360405 |
| 1,11E-04    | 0,004239262 |
| 7,91E-04    | 0,014953713 |
| 3,07E-04    | 0,008161353 |
| 0,001671574 | 0,023957078 |
| 4,94E-04    | 0,011134909 |
| 0,005005745 | 0,048211005 |
| 5,79E-04    | 0,012241441 |
| 0,00131948  | 0,020768523 |
| 0,003003285 | 0,035112418 |
| 0,002444313 | 0,030783005 |
| 7,79E-05    | 0,00339329  |
| 0,00259672  | 0,031979066 |
| 0,003425642 | 0,038263473 |
| 0,001729736 | 0,024543788 |
| 5,92E-04    | 0,012401157 |
| 5,46E-05    | 0,002695226 |
| 5,84E-04    | 0,012311296 |
| 0,00163677  | 0,023708445 |
| 4,08E-05    | 0,002285797 |

# Supplementary\_table\_S3

|             |             |
|-------------|-------------|
| 4,48E-04    | 0,010398045 |
| 0,001300518 | 0,020651518 |
| 2,15E-04    | 0,006513156 |
| 4,54E-04    | 0,010505805 |
| 3,50E-04    | 0,008889481 |
| 9,30E-04    | 0,016723162 |
| 0,001336106 | 0,020956959 |
| 0,002102483 | 0,027798459 |
| 0,005108911 | 0,048898012 |
| 0,001623714 | 0,02359944  |
| 0,002054682 | 0,027353185 |
| 7,28E-04    | 0,014192911 |
| 6,69E-04    | 0,013459969 |
| 0,004756589 | 0,046530153 |
| 1,27E-04    | 0,004678451 |
| 0,002085818 | 0,027660213 |
| 0,003603781 | 0,039325529 |
| 8,85E-04    | 0,016113681 |
| 0,004467408 | 0,044829065 |
| 8,34E-04    | 0,015461534 |
| 0,002036502 | 0,027159869 |
| 0,002194738 | 0,02866933  |
| 0,001450314 | 0,022033696 |
| 0,001751965 | 0,024711688 |
| 0,002196233 | 0,028672035 |
| 5,53E-04    | 0,011999145 |
| 2,45E-05    | 0,001676453 |
| 0,001730498 | 0,024543788 |
| 3,07E-04    | 0,008161353 |
| 0,002082896 | 0,02763793  |
| 0,001219204 | 0,019839004 |
| 0,003435431 | 0,038291557 |
| 6,70E-04    | 0,013480137 |
| 1,87E-04    | 0,005973147 |
| 6,49E-04    | 0,013183055 |
| 0,00455805  | 0,045401115 |
| 0,003284092 | 0,03728947  |
| 5,22E-04    | 0,011582641 |
| 1,63E-04    | 0,005463718 |
| 0,002557079 | 0,03163959  |
| 0,002311225 | 0,029673229 |
| 0,002903845 | 0,034406175 |
| 0,003653838 | 0,039638719 |
| 1,97E-04    | 0,006161377 |
| 0,004173948 | 0,043320001 |
| 0,002656497 | 0,032472829 |
| 0,001394564 | 0,021516466 |
| 5,67E-04    | 0,012117436 |
| 0,00231943  | 0,029731417 |
| 0,00306778  | 0,035591387 |
| 0,005012398 | 0,048222952 |
| 7,07E-04    | 0,013892214 |
| 4,21E-04    | 0,010043777 |

# Supplementary\_table\_S3

|             |             |
|-------------|-------------|
| 0,001831806 | 0,025362448 |
| 2,72E-04    | 0,007613874 |
| 0,002442512 | 0,030769022 |
| 7,94E-04    | 0,014979276 |
| 0,004755176 | 0,046530153 |
| 0,002757976 | 0,033194079 |
| 1,07E-04    | 0,004154984 |
| 4,38E-04    | 0,010280709 |
| 0,004393968 | 0,044452625 |
| 0,003499144 | 0,038609332 |
| 0,00124787  | 0,020125971 |
| 0,001054162 | 0,018122969 |
| 6,72E-04    | 0,01349285  |
| 0,001818332 | 0,025263805 |
| 4,97E-04    | 0,011186736 |
| 0,003646021 | 0,039583206 |
| 5,51E-04    | 0,01196545  |
| 0,002831472 | 0,033813702 |
| 0,004982041 | 0,048003471 |
| 7,58E-06    | 8,23E-04    |
| 6,12E-04    | 0,012657493 |
| 0,001828611 | 0,025343382 |
| 4,74E-04    | 0,010790451 |
| 1,04E-04    | 0,004103487 |
| 0,001019839 | 0,017689924 |
| 0,004214654 | 0,04353839  |
| 2,71E-04    | 0,007609606 |
| 0,002800897 | 0,033582054 |
| 6,26E-04    | 0,012868205 |
| 5,36E-04    | 0,011767563 |
| 0,004928583 | 0,047725977 |
| 1,65E-04    | 0,005521668 |
| 4,36E-04    | 0,010251693 |
| 0,004163972 | 0,043265678 |
| 3,15E-04    | 0,008303463 |
| 4,07E-04    | 0,009842211 |
| 4,68E-05    | 0,002454888 |
| 0,001885919 | 0,025832217 |
| 0,004369042 | 0,044336631 |
| 0,00112634  | 0,0189374   |
| 0,004763657 | 0,046545917 |
| 0,002769732 | 0,033294102 |
| 6,53E-04    | 0,013252761 |
| 0,001618239 | 0,023564177 |
| 0,002732913 | 0,033053188 |
| 0,002890977 | 0,03432188  |
| 6,56E-04    | 0,013291068 |
| 0,003120954 | 0,035959592 |
| 0,001499098 | 0,022498591 |
| 8,97E-05    | 0,003687375 |
| 9,39E-04    | 0,016823018 |
| 0,004932503 | 0,0477534   |
| 0,002559654 | 0,031662659 |

# Supplementary\_table\_S3

|             |             |
|-------------|-------------|
| 0,002543138 | 0,031549285 |
| 0,001299597 | 0,020651518 |
| 0,001673769 | 0,023973111 |
| 2,34E-04    | 0,006879052 |
| 0,002623694 | 0,032230315 |
| 0,003310301 | 0,037458868 |
| 0,004433081 | 0,044650533 |
| 5,53E-04    | 0,011999145 |
| 4,72E-04    | 0,010752547 |
| 0,004507069 | 0,045064623 |
| 4,86E-04    | 0,010996548 |
| 5,68E-04    | 0,012137467 |
| 3,60E-04    | 0,009031112 |
| 0,004841525 | 0,047036177 |
| 0,004428868 | 0,044644282 |
| 0,002573048 | 0,03176919  |
| 0,003626859 | 0,039471001 |
| 0,004216476 | 0,043547112 |
| 9,30E-04    | 0,016723162 |
| 0,001009143 | 0,017572821 |
| 0,001592172 | 0,023333191 |
| 0,004594355 | 0,04560975  |
| 0,001900568 | 0,025945864 |
| 0,003567424 | 0,039062766 |
| 0,00189687  | 0,025918464 |
| 0,003795817 | 0,040527535 |
| 1,24E-04    | 0,00462176  |
| 0,003641939 | 0,039557801 |
| 0,001529892 | 0,022754778 |
| 0,005085687 | 0,048749053 |
| 2,06E-04    | 0,006347481 |
| 3,02E-04    | 0,008078368 |
| 0,004286613 | 0,043985926 |
| 7,95E-04    | 0,014990935 |
| 0,00143674  | 0,02193219  |
| 0,005091631 | 0,048781028 |
| 0,002904257 | 0,034406175 |
| 0,003337282 | 0,037592756 |
| 0,001865823 | 0,025643697 |
| 0,004740736 | 0,046421491 |
| 0,004379987 | 0,044351479 |
| 6,72E-04    | 0,013489501 |
| 2,08E-04    | 0,006393518 |
| 0,004352006 | 0,044218926 |
| 0,001751931 | 0,024711688 |
| 0,003062369 | 0,035588358 |
| 3,06E-04    | 0,008157315 |
| 0,002012172 | 0,026907889 |
| 0,00117313  | 0,019389949 |
| 3,81E-04    | 0,009415446 |
| 0,004203029 | 0,043475742 |
| 0,002551836 | 0,031618632 |
| 7,63E-05    | 0,003352357 |



# Supplementary\_table\_S3

|             |             |
|-------------|-------------|
| 0,001010398 | 0,01758093  |
| 0,003678353 | 0,039836755 |
| 0,002482936 | 0,031076115 |
| 0,004532216 | 0,045214564 |
| 0,004976495 | 0,047981165 |
| 0,005144922 | 0,049105512 |
| 0,003152982 | 0,036178889 |
| 0,002836079 | 0,033832436 |
| 0,002639708 | 0,032365309 |
| 0,001606526 | 0,023448548 |
| 1,11E-05    | 0,001024278 |
| 0,001124965 | 0,0189374   |
| 0,001918852 | 0,026122662 |
| 0,002803855 | 0,033583853 |
| 0,002333881 | 0,029839382 |
| 0,003366911 | 0,037805816 |
| 0,00228264  | 0,029463311 |
| 0,004089803 | 0,0428072   |
| 0,003298609 | 0,037392715 |
| 0,002092446 | 0,027698834 |
| 2,81E-04    | 0,007751197 |
| 0,00180854  | 0,025190624 |
| 7,46E-04    | 0,014408568 |
| 0,001032064 | 0,017811796 |
| 5,18E-05    | 0,002604444 |
| 0,004537685 | 0,045248855 |
| 0,00495102  | 0,047870248 |
| 0,001547258 | 0,022882163 |
| 0,005221646 | 0,049551127 |
| 0,002953561 | 0,034782604 |
| 0,002970075 | 0,034879204 |
| 0,005082123 | 0,048735866 |
| 0,001310537 | 0,020722957 |
| 0,001469686 | 0,022199283 |
| 0,002038272 | 0,027166206 |
| 0,001449204 | 0,022032446 |
| 0,002522938 | 0,031400318 |
| 0,002681229 | 0,032667575 |
| 5,75E-04    | 0,012214826 |
| 4,24E-04    | 0,010081807 |
| 0,001106097 | 0,018771646 |
| 0,001113777 | 0,018816132 |
| 0,002543406 | 0,031549285 |
| 0,004499904 | 0,0450233   |
| 3,06E-05    | 0,001915156 |
| 0,003319999 | 0,037481244 |
| 0,001747498 | 0,024703447 |
| 7,68E-05    | 0,003364229 |
| 5,85E-05    | 0,002837575 |
| 0,002161722 | 0,028354466 |
| 0,001391139 | 0,021486439 |
| 0,002351947 | 0,029992883 |
| 0,001218819 | 0,019839004 |

# Supplementary\_table\_S3

|             |             |
|-------------|-------------|
| 0,001122621 | 0,018927333 |
| 0,00466777  | 0,045959583 |
| 0,004556081 | 0,045391652 |
| 8,64E-04    | 0,015857839 |
| 8,43E-04    | 0,015594173 |
| 0,003580316 | 0,039165418 |
| 0,004758958 | 0,046530153 |
| 0,001693973 | 0,024192478 |
| 0,00242388  | 0,030609623 |
| 0,003774669 | 0,040398574 |
| 0,00277413  | 0,033334466 |
| 0,003318668 | 0,037481244 |
| 0,001240194 | 0,02005198  |
| 0,001236909 | 0,020027944 |
| 0,001271614 | 0,020353128 |
| 0,00129043  | 0,02057299  |
| 0,0017852   | 0,025021877 |
| 8,72E-04    | 0,015953486 |
| 0,004063348 | 0,042657971 |
| 0,001900623 | 0,025945864 |
| 0,002198556 | 0,028690769 |
| 0,003050981 | 0,035516784 |
| 7,64E-04    | 0,014638178 |
| 0,001816635 | 0,025263805 |
| 0,002931492 | 0,034634759 |
| 0,001064155 | 0,018273606 |
| 0,001955022 | 0,026461413 |
| 0,002679509 | 0,032655552 |
| 0,00157783  | 0,023203326 |
| 0,004343928 | 0,044167066 |
| 4,06E-04    | 0,009835591 |
| 0,002156824 | 0,028340286 |
| 0,004076253 | 0,042733022 |
| 2,91E-04    | 0,007875447 |
| 0,002327349 | 0,029790072 |
| 0,004232272 | 0,043619232 |
| 0,001439636 | 0,021946324 |
| 0,003602283 | 0,039322658 |
| 0,001513426 | 0,022629764 |
| 6,93E-04    | 0,013724255 |
| 0,005178491 | 0,049320227 |
| 0,002161708 | 0,028354466 |
| 0,003724689 | 0,040114248 |
| 0,003098214 | 0,035762334 |
| 0,001715168 | 0,024409086 |
| 1,32E-04    | 0,004810941 |
| 0,001460623 | 0,022137465 |
| 0,002190925 | 0,028636321 |
| 0,00341966  | 0,038225654 |
| 1,67E-04    | 0,005552262 |
| 0,005048932 | 0,048490649 |
| 0,003610904 | 0,039383965 |
| 0,00412638  | 0,043080646 |

# Supplementary\_table\_S3

|             |             |
|-------------|-------------|
| 0,001895229 | 0,02590398  |
| 2,78E-04    | 0,007702264 |
| 0,00235064  | 0,029984793 |
| 0,003132869 | 0,036040925 |
| 0,004488714 | 0,044957809 |
| 4,43E-04    | 0,01031814  |
| 0,002278889 | 0,029431956 |
| 1,05E-05    | 9,92E-04    |
| 0,001250263 | 0,020141666 |
| 2,33E-04    | 0,00687271  |
| 0,002533063 | 0,031473572 |
| 0,00421889  | 0,043551851 |
| 0,002692219 | 0,032759963 |
| 0,003133327 | 0,036040925 |
| 0,00386042  | 0,041079444 |
| 0,002421415 | 0,030600633 |
| 0,002739378 | 0,033078498 |
| 0,003585748 | 0,039206885 |
| 0,001112746 | 0,01881068  |
| 0,002735315 | 0,033060917 |
| 0,004467333 | 0,044829065 |
| 0,004204789 | 0,043475742 |
| 9,99E-05    | 0,004003347 |
| 4,40E-04    | 0,010291188 |
| 0,004036644 | 0,042467703 |
| 0,002416983 | 0,030568455 |
| 0,004115357 | 0,043021465 |
| 0,002584491 | 0,03187253  |
| 0,001298003 | 0,020649366 |
| 0,001767592 | 0,024853421 |
| 0,002408375 | 0,030482475 |
| 3,93E-04    | 0,009656822 |
| 0,001858029 | 0,025571453 |
| 0,001059933 | 0,018215151 |
| 2,73E-04    | 0,00762624  |
| 0,004618848 | 0,045669692 |
| 2,83E-04    | 0,007759204 |
| 0,001140029 | 0,01904781  |
| 0,001005547 | 0,017544498 |
| 0,002742892 | 0,033084044 |
| 0,001320963 | 0,020777184 |
| 0,002493803 | 0,031177086 |
| 1,93E-04    | 0,006055447 |
| 0,004186005 | 0,043373204 |
| 0,005284315 | 0,049943673 |
| 0,001132624 | 0,018991869 |
| 7,63E-04    | 0,014610922 |
| 0,001019267 | 0,017686879 |
| 0,005093971 | 0,048784879 |
| 0,001212608 | 0,019799998 |
| 0,004604133 | 0,045625713 |
| 0,002218123 | 0,028856324 |
| 0,003553487 | 0,03897723  |

# Supplementary\_table\_S3

|             |             |
|-------------|-------------|
| 0,003544864 | 0,038924547 |
| 6,94E-04    | 0,013734888 |
| 0,003914817 | 0,04148648  |
| 0,005124801 | 0,048976433 |
| 0,003625908 | 0,039470296 |
| 5,30E-04    | 0,011699133 |
| 0,004245874 | 0,043728635 |
| 0,003818581 | 0,04073306  |
| 0,002569656 | 0,031756406 |
| 0,004569445 | 0,045494415 |
| 0,003963237 | 0,041863512 |
| 0,001305531 | 0,020687854 |
| 0,002730243 | 0,033037724 |
| 7,69E-05    | 0,003364229 |
| 0,004785128 | 0,046684697 |
| 2,47E-04    | 0,007178612 |
| 0,004634975 | 0,045763928 |
| 0,002940736 | 0,034699901 |
| 0,002802836 | 0,033583853 |
| 0,001491223 | 0,022395495 |
| 0,002285354 | 0,029472729 |
| 0,003740358 | 0,040205241 |
| 0,004778415 | 0,04665711  |
| 0,002151725 | 0,028300541 |
| 0,002573259 | 0,03176919  |
| 0,001395931 | 0,021523135 |
| 0,004065126 | 0,042666581 |
| 0,004205868 | 0,043475742 |
| 0,001684514 | 0,024088282 |
| 0,003773612 | 0,040396969 |
| 0,002575124 | 0,031783409 |
| 0,002323297 | 0,029746753 |
| 0,00352632  | 0,038765156 |
| 0,001373866 | 0,021314731 |
| 0,003501494 | 0,038614365 |
| 0,002579013 | 0,031813784 |
| 0,001735652 | 0,024590606 |
| 0,004324144 | 0,044057139 |
| 0,001536084 | 0,02279258  |
| 0,004601948 | 0,045625713 |
| 0,003925182 | 0,041560093 |
| 0,002475898 | 0,031012437 |
| 0,004225528 | 0,043590067 |
| 0,00298701  | 0,034967748 |
| 0,003347677 | 0,037665803 |
| 0,004224238 | 0,043586852 |
| 2,93E-04    | 0,007912851 |
| 0,001672277 | 0,02395944  |
| 0,002835816 | 0,033832436 |
| 0,003015708 | 0,035211452 |
| 0,002217541 | 0,028856324 |
| 3,40E-04    | 0,008716565 |
| 0,004713173 | 0,046262045 |

# Supplementary\_table\_S3

|             |             |
|-------------|-------------|
| 0,003487405 | 0,038527525 |
| 0,002176916 | 0,028478286 |
| 1,04E-04    | 0,004103487 |
| 0,002674262 | 0,032618377 |
| 0,002457677 | 0,030908484 |
| 2,84E-04    | 0,007759204 |
| 1,96E-04    | 0,006141048 |
| 0,003952002 | 0,04177456  |
| 0,004632334 | 0,045762839 |
| 0,003521214 | 0,038728136 |
| 0,001303518 | 0,020678024 |
| 0,003779979 | 0,040424009 |
| 4,95E-04    | 0,011164485 |
| 0,004403741 | 0,044500959 |
| 0,004600156 | 0,045625713 |
| 5,72E-04    | 0,012188658 |
| 0,005211999 | 0,049522888 |
| 0,003318042 | 0,037481244 |
| 2,85E-04    | 0,007759204 |
| 0,002368523 | 0,030118042 |
| 8,55E-04    | 0,015738799 |
| 2,82E-04    | 0,007759204 |
| 0,002151893 | 0,028300541 |
| 0,004147306 | 0,043200097 |
| 0,001409795 | 0,021632066 |
| 0,00135267  | 0,021141526 |
| 0,002453461 | 0,030872029 |
| 0,004092635 | 0,042814077 |
| 0,004450155 | 0,044754424 |
| 0,003911878 | 0,041484741 |
| 3,26E-04    | 0,008484423 |
| 0,003602346 | 0,039322658 |
| 8,61E-04    | 0,015823685 |
| 0,001569293 | 0,023120972 |
| 0,003222392 | 0,036748139 |
| 0,002586202 | 0,031884795 |
| 0,003325261 | 0,03751784  |
| 0,001186112 | 0,019538685 |
| 0,001647047 | 0,023775293 |
| 0,003067537 | 0,035591387 |
| 0,004177288 | 0,043323191 |
| 0,002210669 | 0,028794261 |
| 0,001528786 | 0,022752499 |
| 0,003415596 | 0,038217611 |
| 0,002489493 | 0,031140682 |
| 0,00329062  | 0,037335046 |
| 0,005197717 | 0,049439911 |
| 0,004698915 | 0,04618457  |
| 4,60E-04    | 0,010578988 |
| 0,003349387 | 0,037675528 |
| 0,002206554 | 0,02875621  |
| 5,12E-04    | 0,011426534 |
| 0,005206515 | 0,049502454 |

# Supplementary\_table\_S3

|             |             |
|-------------|-------------|
| 0,003738517 | 0,040195154 |
| 0,003965792 | 0,041880565 |
| 0,002088086 | 0,027682058 |
| 0,004478283 | 0,044887637 |
| 0,003011246 | 0,035183003 |
| 0,004363832 | 0,044318858 |
| 4,21E-04    | 0,010043777 |
| 0,004297276 | 0,044022306 |
| 0,001554567 | 0,022967372 |
| 0,004966793 | 0,047908361 |
| 4,37E-04    | 0,010251693 |
| 0,001110626 | 0,018793982 |
| 0,004011452 | 0,042242579 |
| 0,00281094  | 0,033640656 |
| 0,004351241 | 0,044218926 |
| 9,28E-04    | 0,016717931 |
| 0,004398324 | 0,044486586 |
| 0,003404961 | 0,038136935 |
| 0,00328179  | 0,037272835 |
| 0,00445175  | 0,044754424 |
| 0,003158817 | 0,036217847 |
| 7,66E-04    | 0,014662644 |
| 4,52E-04    | 0,010473851 |
| 0,001258763 | 0,020240478 |
| 0,001293755 | 0,02061018  |
| 0,00457863  | 0,045521965 |
| 0,00118264  | 0,019510932 |
| 0,003609243 | 0,039375488 |
| 0,004046049 | 0,042526474 |
| 0,001370065 | 0,021293858 |
| 0,003289884 | 0,037335046 |
| 0,001562059 | 0,023039854 |
| 0,001354961 | 0,021169892 |
| 0,001378792 | 0,021347549 |
| 0,003489223 | 0,038538044 |
| 0,00265628  | 0,032472829 |
| 0,003102436 | 0,035792929 |
| 0,003721006 | 0,040110054 |
| 0,002531057 | 0,031457426 |
| 3,40E-07    | 1,39E-05    |
| 2,97E-05    | 5,74E-04    |
| 4,69E-04    | 0,005354007 |
| 6,48E-06    | 1,64E-04    |
| 6,11E-07    | 2,27E-05    |
| 1,15E-05    | 2,64E-04    |
| 1,25E-08    | 9,30E-07    |
| 0,002035004 | 0,016877408 |
| 2,31E-05    | 4,66E-04    |
| 1,92E-04    | 0,002625626 |
| 3,24E-06    | 9,23E-05    |
| 4,18E-04    | 0,004891921 |
| 0,003642309 | 0,026271146 |
| 1,06E-04    | 0,001612446 |

# Supplementary\_table\_S3

|             |             |
|-------------|-------------|
| 4,91E-06    | 1,31E-04    |
| 2,37E-05    | 4,76E-04    |
| 1,14E-05    | 2,64E-04    |
| 2,29E-04    | 0,003012816 |
| 1,20E-06    | 4,04E-05    |
| 3,39E-06    | 9,57E-05    |
| 9,63E-06    | 2,28E-04    |
| 2,04E-06    | 6,32E-05    |
| 0,002055648 | 0,017003919 |
| 1,35E-05    | 3,02E-04    |
| 3,16E-07    | 1,32E-05    |
| 5,48E-06    | 1,44E-04    |
| 0,002271954 | 0,018429155 |
| 4,76E-06    | 1,28E-04    |
| 0,007714309 | 0,046322071 |
| 5,77E-07    | 2,16E-05    |
| 2,05E-04    | 0,002762548 |
| 1,14E-13    | 6,93E-11    |
| 9,19E-09    | 7,27E-07    |
| 3,62E-04    | 0,0043475   |
| 0,001526618 | 0,013458301 |
| 4,39E-05    | 7,87E-04    |
| 7,25E-04    | 0,007546525 |
| 7,77E-05    | 0,00125915  |
| 2,37E-04    | 0,0030924   |
| 0,001872612 | 0,015799183 |
| 2,49E-11    | 6,14E-09    |
| 8,59E-05    | 0,001363396 |
| 6,39E-07    | 2,36E-05    |
| 8,62E-08    | 4,51E-06    |
| 8,49E-04    | 0,008547689 |
| 1,37E-04    | 0,002000202 |
| 6,85E-05    | 0,001130419 |
| 5,16E-04    | 0,005782885 |
| 4,03E-07    | 1,62E-05    |
| 5,63E-05    | 9,65E-04    |
| 6,01E-04    | 0,006526248 |
| 6,75E-05    | 0,001117472 |
| 3,50E-05    | 6,56E-04    |
| 1,55E-04    | 0,002204961 |
| 0,001198099 | 0,011115545 |
| 1,23E-04    | 0,00182043  |
| 4,71E-05    | 8,34E-04    |
| 0,004648667 | 0,031703249 |
| 7,23E-07    | 2,63E-05    |
| 1,61E-08    | 1,14E-06    |
| 2,07E-05    | 4,27E-04    |
| 2,78E-07    | 1,19E-05    |
| 6,66E-04    | 0,007061723 |
| 2,26E-05    | 4,59E-04    |
| 1,35E-06    | 4,46E-05    |
| 0,005277147 | 0,034820193 |
| 3,44E-04    | 0,004192843 |

# Supplementary\_table\_S3

|             |             |
|-------------|-------------|
| 0,00457012  | 0,031293846 |
| 4,79E-05    | 8,45E-04    |
| 1,29E-04    | 0,001897486 |
| 1,13E-05    | 2,62E-04    |
| 0,003124592 | 0,023465141 |
| 2,79E-04    | 0,003544198 |
| 5,47E-04    | 0,00605356  |
| 2,60E-05    | 5,14E-04    |
| 2,28E-05    | 4,62E-04    |
| 8,57E-04    | 0,008607667 |
| 3,69E-04    | 0,004420096 |
| 6,20E-06    | 1,58E-04    |
| 4,43E-04    | 0,005122897 |
| 1,01E-06    | 3,48E-05    |
| 2,25E-11    | 5,71E-09    |
| 4,93E-04    | 0,00557171  |
| 1,52E-04    | 0,002172887 |
| 0,001522174 | 0,01343414  |
| 4,23E-07    | 1,67E-05    |
| 4,26E-05    | 7,69E-04    |
| 4,40E-05    | 7,90E-04    |
| 1,29E-06    | 4,30E-05    |
| 2,52E-04    | 0,003256891 |
| 3,49E-06    | 9,83E-05    |
| 1,42E-05    | 3,15E-04    |
| 7,60E-05    | 0,001235203 |
| 1,31E-06    | 4,35E-05    |
| 5,82E-04    | 0,006349659 |
| 8,72E-08    | 4,56E-06    |
| 5,21E-05    | 9,04E-04    |
| 5,41E-04    | 0,006006055 |
| 5,02E-05    | 8,78E-04    |
| 8,65E-05    | 0,001371831 |
| 2,33E-04    | 0,003052723 |
| 0,001810181 | 0,015395969 |
| 1,68E-05    | 3,59E-04    |
| 7,80E-05    | 0,001261629 |
| 3,70E-05    | 6,86E-04    |
| 3,89E-04    | 0,004620309 |
| 0,001657418 | 0,014378366 |
| 3,33E-04    | 0,004087251 |
| 6,10E-04    | 0,006601397 |
| 1,37E-07    | 6,67E-06    |
| 1,07E-05    | 2,48E-04    |
| 1,39E-06    | 4,56E-05    |
| 0,001242296 | 0,011442037 |
| 2,03E-06    | 6,29E-05    |
| 0,001200325 | 0,011131293 |
| 4,98E-07    | 1,91E-05    |
| 1,36E-05    | 3,03E-04    |
| 2,17E-04    | 0,002894101 |
| 2,02E-04    | 0,002727523 |
| 6,31E-05    | 0,001056984 |



# Supplementary\_table\_S3

|             |             |
|-------------|-------------|
| 4,84E-05    | 8,53E-04    |
| 4,60E-09    | 4,10E-07    |
| 7,40E-10    | 9,52E-08    |
| 6,71E-04    | 0,00710691  |
| 2,97E-06    | 8,60E-05    |
| 3,19E-05    | 6,09E-04    |
| 3,49E-07    | 1,42E-05    |
| 0,001158392 | 0,010842755 |
| 3,34E-04    | 0,004087251 |
| 8,42E-04    | 0,008496684 |
| 0,001185479 | 0,011023864 |
| 4,67E-06    | 1,26E-04    |
| 2,16E-05    | 4,42E-04    |
| 5,33E-10    | 7,35E-08    |
| 6,41E-05    | 0,001071665 |
| 3,13E-04    | 0,003889242 |
| 0,001243425 | 0,011450201 |
| 1,39E-07    | 6,77E-06    |
| 3,13E-04    | 0,003889242 |
| 0,001753338 | 0,015042277 |
| 8,20E-05    | 0,001311074 |
| 0,002354533 | 0,018956034 |
| 1,28E-06    | 4,26E-05    |
| 7,08E-05    | 0,001163048 |
| 7,47E-05    | 0,001216901 |
| 5,19E-05    | 9,00E-04    |
| 8,56E-04    | 0,008596826 |
| 1,15E-07    | 5,78E-06    |
| 2,33E-09    | 2,33E-07    |
| 4,24E-05    | 7,67E-04    |
| 1,63E-06    | 5,21E-05    |
| 7,18E-05    | 0,001178368 |
| 3,21E-04    | 0,003972859 |
| 2,74E-17    | 1,62E-13    |
| 5,88E-04    | 0,006412217 |
| 1,09E-08    | 8,34E-07    |
| 2,77E-08    | 1,78E-06    |
| 3,29E-04    | 0,004048616 |
| 6,48E-05    | 0,001079201 |
| 2,50E-05    | 4,97E-04    |
| 0,002529953 | 0,01999749  |
| 1,07E-04    | 0,001623086 |
| 1,32E-05    | 2,97E-04    |
| 1,81E-04    | 0,002506106 |
| 7,53E-09    | 6,12E-07    |
| 0,002693637 | 0,020982879 |
| 1,94E-04    | 0,002657345 |
| 1,06E-04    | 0,001611026 |
| 3,06E-04    | 0,003823825 |
| 0,007327041 | 0,044699954 |
| 8,67E-05    | 0,001374272 |
| 0,002111924 | 0,017402505 |
| 5,30E-04    | 0,005909947 |

# Supplementary\_table\_S3

|             |             |
|-------------|-------------|
| 4,54E-06    | 1,23E-04    |
| 1,28E-04    | 0,001892159 |
| 7,79E-04    | 0,007994096 |
| 1,85E-07    | 8,55E-06    |
| 3,93E-06    | 1,09E-04    |
| 0,008067954 | 0,04788659  |
| 5,00E-04    | 0,00563742  |
| 0,001359256 | 0,012274801 |
| 1,12E-06    | 3,81E-05    |
| 1,22E-04    | 0,001819321 |
| 2,96E-05    | 5,72E-04    |
| 4,50E-08    | 2,66E-06    |
| 0,001573642 | 0,01380086  |
| 4,51E-10    | 6,42E-08    |
| 0,002529903 | 0,01999749  |
| 0,001284868 | 0,011758619 |
| 0,002336422 | 0,018829441 |
| 2,62E-04    | 0,003371267 |
| 2,55E-06    | 7,61E-05    |
| 0,00122861  | 0,011357527 |
| 2,49E-08    | 1,64E-06    |
| 1,51E-04    | 0,002158707 |
| 4,02E-04    | 0,004736826 |
| 8,14E-04    | 0,008261043 |
| 4,30E-05    | 7,75E-04    |
| 0,001273859 | 0,011683958 |
| 0,002694895 | 0,02098922  |
| 7,56E-04    | 0,007803246 |
| 1,65E-09    | 1,76E-07    |
| 0,001341018 | 0,012154953 |
| 2,00E-05    | 4,14E-04    |
| 0,00347481  | 0,025360644 |
| 1,35E-05    | 3,01E-04    |
| 3,86E-05    | 7,10E-04    |
| 1,19E-09    | 1,36E-07    |
| 5,73E-11    | 1,23E-08    |
| 4,02E-06    | 1,11E-04    |
| 5,88E-04    | 0,006409575 |
| 1,11E-09    | 1,30E-07    |
| 0,00333994  | 0,024623151 |
| 4,74E-07    | 1,83E-05    |
| 7,18E-04    | 0,007493067 |
| 0,007193174 | 0,044115711 |
| 5,00E-05    | 8,76E-04    |
| 0,001324187 | 0,012034666 |
| 1,13E-09    | 1,30E-07    |
| 8,13E-06    | 1,98E-04    |
| 0,001537824 | 0,013539427 |
| 9,34E-06    | 2,22E-04    |
| 4,65E-06    | 1,26E-04    |
| 2,65E-05    | 5,22E-04    |
| 9,76E-04    | 0,009500354 |
| 3,81E-04    | 0,004546991 |

# Supplementary\_table\_S3

|             |             |
|-------------|-------------|
| 6,36E-04    | 0,006822034 |
| 0,004542931 | 0,031157266 |
| 0,002608756 | 0,020463143 |
| 0,001672613 | 0,014483634 |
| 1,57E-06    | 5,05E-05    |
| 1,04E-06    | 3,57E-05    |
| 6,13E-08    | 3,43E-06    |
| 5,46E-06    | 1,43E-04    |
| 2,09E-08    | 1,42E-06    |
| 1,23E-04    | 0,001825858 |
| 0,001299524 | 0,01186521  |
| 1,53E-06    | 4,96E-05    |
| 2,42E-07    | 1,07E-05    |
| 5,97E-07    | 2,23E-05    |
| 6,90E-04    | 0,007267999 |
| 8,01E-06    | 1,96E-04    |
| 4,15E-06    | 1,14E-04    |
| 0,001481532 | 0,013149012 |
| 1,49E-07    | 7,18E-06    |
| 6,54E-04    | 0,006972785 |
| 0,001242108 | 0,011442037 |
| 5,78E-04    | 0,006311931 |
| 1,06E-06    | 3,61E-05    |
| 6,66E-07    | 2,44E-05    |
| 0,003576611 | 0,025910319 |
| 2,69E-06    | 7,91E-05    |
| 0,001788646 | 0,015245692 |
| 0,007857679 | 0,046968415 |
| 0,001067817 | 0,010167464 |
| 6,81E-09    | 5,67E-07    |
| 1,45E-04    | 0,002088884 |
| 0,001990063 | 0,016588997 |
| 8,62E-11    | 1,70E-08    |
| 7,04E-05    | 0,001157544 |
| 1,18E-04    | 0,001760126 |
| 1,03E-04    | 0,001568774 |
| 2,86E-05    | 5,54E-04    |
| 0,004368184 | 0,030252537 |
| 0,005994788 | 0,038414538 |
| 1,18E-04    | 0,001759162 |
| 7,44E-04    | 0,00770221  |
| 4,88E-04    | 0,005528131 |
| 7,25E-06    | 1,80E-04    |
| 5,22E-11    | 1,13E-08    |
| 2,65E-04    | 0,00339641  |
| 9,12E-06    | 2,18E-04    |
| 0,003337586 | 0,024609629 |
| 2,90E-07    | 1,23E-05    |
| 2,03E-05    | 4,19E-04    |
| 3,31E-04    | 0,004068835 |
| 0,001069449 | 0,010178912 |
| 6,06E-05    | 0,001023502 |
| 1,71E-05    | 3,65E-04    |

# Supplementary\_table\_S3

|             |             |
|-------------|-------------|
| 9,18E-04    | 0,009087822 |
| 0,003317993 | 0,024530135 |
| 1,41E-04    | 0,002045186 |
| 2,03E-04    | 0,002745538 |
| 9,69E-05    | 0,001497372 |
| 2,07E-04    | 0,002780151 |
| 1,94E-10    | 3,21E-08    |
| 0,00128445  | 0,011757065 |
| 2,32E-04    | 0,00304943  |
| 1,36E-04    | 0,016882991 |
| 1,78E-04    | 0,019439782 |
| 9,33E-05    | 0,013579379 |
| 4,90E-04    | 0,034305533 |
| 1,29E-06    | 0,001152854 |
| 5,23E-04    | 0,035505411 |
| 3,39E-04    | 0,027998024 |
| 7,22E-04    | 0,042358384 |
| 1,30E-04    | 0,016429027 |
| 1,80E-04    | 0,019484542 |
| 1,43E-04    | 0,017266589 |
| 1,26E-05    | 0,004226654 |
| 8,10E-05    | 0,012443541 |
| 2,26E-04    | 0,022206068 |
| 1,22E-04    | 0,015760865 |
| 5,08E-07    | 7,67E-04    |
| 8,44E-04    | 0,046503963 |
| 1,58E-04    | 0,018352647 |
| 1,20E-04    | 0,015601692 |
| 2,27E-04    | 0,022213247 |
| 2,06E-04    | 0,021106946 |
| 2,81E-05    | 0,006992473 |
| 9,57E-04    | 0,049982263 |
| 4,94E-04    | 0,034317837 |
| 6,92E-05    | 0,011523876 |
| 8,03E-04    | 0,044891022 |
| 1,03E-04    | 0,014398836 |
| 2,21E-05    | 0,005964272 |
| 4,65E-04    | 0,033513331 |
| 7,49E-04    | 0,043227023 |
| 7,80E-04    | 0,044317107 |
| 2,99E-04    | 0,026094038 |
| 9,34E-06    | 0,003535583 |
| 1,78E-04    | 0,019439782 |
| 1,01E-05    | 0,003672926 |
| 3,31E-04    | 0,027861269 |
| 3,12E-04    | 0,026702677 |
| 6,32E-04    | 0,039216081 |
| 8,14E-05    | 0,01246144  |
| 9,55E-04    | 0,049982263 |
| 5,94E-05    | 0,010417307 |
| 3,13E-06    | 0,001751528 |
| 5,05E-06    | 0,002411591 |
| 5,93E-04    | 0,037986282 |

# Supplementary\_table\_S3

|          |             |
|----------|-------------|
| 1,87E-04 | 0,019927339 |
| 5,24E-04 | 0,035505411 |
| 8,88E-04 | 0,047765231 |
| 5,23E-05 | 0,00951812  |
| 1,36E-04 | 0,016892705 |
| 2,73E-04 | 0,024809457 |
| 1,23E-04 | 0,015865113 |
| 4,62E-04 | 0,033513331 |
| 4,40E-04 | 0,032646375 |
| 3,36E-04 | 0,027973661 |
| 8,92E-04 | 0,047826835 |
| 3,08E-04 | 0,026550941 |
| 8,19E-05 | 0,01247171  |
| 3,02E-05 | 0,00708452  |
| 4,76E-04 | 0,03378353  |
| 8,09E-05 | 0,012443541 |
| 2,02E-05 | 0,005729914 |
| 3,72E-04 | 0,029190575 |
| 2,15E-05 | 0,005847929 |
| 6,63E-05 | 0,01120797  |
| 4,88E-06 | 0,002354376 |
| 6,05E-07 | 7,75E-04    |
| 2,16E-04 | 0,021595182 |
| 2,51E-04 | 0,023542712 |
| 1,78E-04 | 0,019439782 |
| 6,10E-04 | 0,03854472  |
| 1,70E-06 | 0,001295115 |
| 2,48E-04 | 0,023488274 |
| 1,24E-05 | 0,004226654 |
| 3,98E-04 | 0,030412786 |
| 2,05E-05 | 0,005729914 |
| 7,31E-05 | 0,011730084 |
| 5,02E-04 | 0,034476343 |
| 9,09E-05 | 0,013402036 |
| 3,23E-04 | 0,02739287  |
| 7,23E-05 | 0,011638237 |
| 6,99E-04 | 0,041601568 |
| 1,05E-04 | 0,014518195 |
| 4,56E-05 | 0,008837876 |
| 6,58E-05 | 0,01120797  |
| 1,11E-04 | 0,015115844 |
| 2,46E-04 | 0,02344981  |
| 8,16E-04 | 0,045485195 |
| 2,94E-04 | 0,025757313 |
| 4,37E-04 | 0,032533679 |
| 2,48E-04 | 0,023488274 |
| 1,18E-04 | 0,015492309 |
| 3,73E-04 | 0,029190575 |
| 1,67E-04 | 0,018864685 |
| 3,17E-05 | 0,00721118  |
| 2,99E-06 | 0,001751528 |
| 7,33E-04 | 0,042800566 |
| 1,28E-05 | 0,004226654 |

# Supplementary\_table\_S3

|          |             |
|----------|-------------|
| 6,67E-04 | 0,040629127 |
| 2,84E-04 | 0,025373872 |
| 5,01E-05 | 0,00937219  |
| 2,81E-04 | 0,025262574 |
| 2,73E-04 | 0,024809457 |
| 4,16E-05 | 0,008263491 |
| 5,10E-05 | 0,009373727 |
| 5,07E-04 | 0,034745851 |
| 7,05E-04 | 0,041723078 |
| 3,53E-04 | 0,028507442 |
| 1,05E-04 | 0,014554497 |
| 8,85E-05 | 0,013165715 |
| 7,03E-04 | 0,041662442 |
| 6,05E-04 | 0,0383575   |
| 4,98E-05 | 0,009356118 |
| 3,31E-05 | 0,007354242 |
| 7,03E-04 | 0,041662442 |
| 2,97E-04 | 0,025957956 |
| 5,68E-04 | 0,037379805 |
| 2,35E-04 | 0,022688356 |
| 1,02E-04 | 0,014338997 |
| 5,77E-04 | 0,037633883 |
| 1,92E-04 | 0,020193039 |
| 4,61E-04 | 0,033513331 |
| 1,54E-04 | 0,017959918 |
