# Supplementary material for: The Impact of Cand1 in Prostate Cancer
Source: MDPI journal article supplement (doi:10.3390/cancers12020428), 2020-02-12
Supplement: s1 [file s1]

## Supplementary\_Table\_S6

### GO term

GO:0045159~myosin II binding  
GO:0005024~transforming growth factor beta-activated receptor activity  
GO:0017166~vinculin binding  
GO:0043394~proteoglycan binding  
GO:0009268~response to pH  
GO:0051693~actin filament capping  
GO:0051016~barbed-end actin filament capping  
GO:0017049~GTP-Rho binding  
GO:0050431~transforming growth factor beta binding  
GO:0005539~glycosaminoglycan binding  
GO:0030506~ankyrin binding  
GO:0046697~decidualization  
GO:0017015~regulation of transforming growth factor beta receptor signaling pathway  
GO:0048844~artery morphogenesis  
GO:0010906~regulation of glucose metabolic process  
GO:0072661~protein targeting to plasma membrane  
GO:0005080~protein kinase C binding  
GO:0001974~blood vessel remodeling  
GO:0004190~aspartic-type endopeptidase activity  
GO:0005178~integrin binding  
GO:0006911~phagocytosis, engulfment  
GO:0042475~odontogenesis of dentin-containing tooth  
GO:0006695~cholesterol biosynthetic process  
GO:0001756~somitogenesis  
GO:0050681~androgen receptor binding  
GO:0030521~androgen receptor signaling pathway  
GO:0030163~protein catabolic process  
GO:0001541~ovarian follicle development  
GO:0008015~blood circulation  
GO:0071260~cellular response to mechanical stimulus  
GO:0035914~skeletal muscle cell differentiation  
GO:0030374~ligand-dependent nuclear receptor transcription coactivator activity  
GO:0022617~extracellular matrix disassembly  
GO:0051015~actin filament binding  
GO:0043410~positive regulation of MAPK cascade  
GO:0006928~movement of cell or subcellular component  
GO:0005518~collagen binding  
GO:0044267~cellular protein metabolic process  
GO:0004197~cysteine-type endopeptidase activity  
GO:0019903~protein phosphatase binding  
GO:0030336~negative regulation of cell migration  
GO:0030512~negative regulation of transforming growth factor beta receptor signaling pathway  
GO:0030574~collagen catabolic process  
GO:0002576~platelet degranulation  
GO:0030855~epithelial cell differentiation  
GO:0006936~muscle contraction  
GO:0005200~structural constituent of cytoskeleton  
GO:0007219~Notch signaling pathway  
GO:0001558~regulation of cell growth  
GO:0042060~wound healing  
GO:0046718~viral entry into host cell

## Supplementary\_Table\_S6

GO:0019904~protein domain specific binding  
GO:0006890~retrograde vesicle-mediated transport, Golgi to ER  
GO:0006914~autophagy  
GO:0007565~female pregnancy  
GO:0006457~protein folding  
GO:0007179~transforming growth factor beta receptor signaling pathway  
GO:0003824~catalytic activity  
GO:0005516~calmodulin binding  
GO:0046854~phosphatidylinositol phosphorylation  
GO:0098641~cadherin binding involved in cell-cell adhesion  
GO:0008289~lipid binding  
GO:0007229~integrin-mediated signaling pathway  
GO:0016337~single organismal cell-cell adhesion  
GO:0008201~heparin binding  
GO:0051082~unfolded protein binding  
GO:0098609~cell-cell adhesion  
GO:0003779~actin binding  
GO:0044325~ion channel binding  
GO:0001666~response to hypoxia  
GO:0007155~cell adhesion  
GO:0042127~regulation of cell proliferation  
GO:0001701~in utero embryonic development  
GO:0001934~positive regulation of protein phosphorylation  
GO:0030198~extracellular matrix organization  
GO:0010628~positive regulation of gene expression  
GO:0019221~cytokine-mediated signaling pathway  
GO:0051056~regulation of small GTPase mediated signal transduction  
GO:0010629~negative regulation of gene expression  
GO:0001501~skeletal system development  
GO:0016192~vesicle-mediated transport  
GO:0007010~cytoskeleton organization  
GO:0008152~metabolic process  
GO:0016477~cell migration  
GO:0051260~protein homooligomerization  
GO:0005096~GTPase activator activity  
GO:0005215~transporter activity  
GO:0016032~viral process  
GO:0006508~proteolysis  
GO:0008017~microtubule binding  
GO:0000977~RNA polymerase II regulatory region sequence-specific DNA binding  
GO:0034220~ion transmembrane transport  
GO:0004872~receptor activity  
GO:0042981~regulation of apoptotic process  
GO:0003924~GTPase activity  
GO:0005102~receptor binding  
GO:0005509~calcium ion binding  
GO:0042803~protein homodimerization activity  
GO:0003713~transcription coactivator activity  
GO:0004252~serine-type endopeptidase activity  
GO:0006366~transcription from RNA polymerase II promoter  
GO:0000165~MAPK cascade  
GO:0015031~protein transport  
GO:0008134~transcription factor binding

### Supplementary\_Table\_S6

GO:0031625~ubiquitin protein ligase binding  
GO:0043547~positive regulation of GTPase activity  
GO:0000122~negative regulation of transcription from RNA polymerase II promoter  
GO:0007165~signal transduction  
GO:0006357~regulation of transcription from RNA polymerase II promoter  
GO:0043065~positive regulation of apoptotic process  
GO:0019899~enzyme binding  
GO:0045893~positive regulation of transcription, DNA-templated  
GO:0051301~cell division  
GO:0008283~cell proliferation  
GO:0005515~protein binding  
GO:0042802~identical protein binding  
GO:0044822~poly(A) RNA binding  
GO:0043066~negative regulation of apoptotic process  
GO:0006468~protein phosphorylation  
GO:0008270~zinc ion binding  
GO:0045944~positive regulation of transcription from RNA polymerase II promoter  
GO:0007275~multicellular organism development  
GO:0005524~ATP binding  
GO:0055114~oxidation-reduction process  
GO:0003700~transcription factor activity, sequence-specific DNA binding  
GO:0006351~transcription, DNA-templated  
GO:0003677~DNA binding  
GO:0006355~regulation of transcription, DNA-templated  
GO:0046872~metal ion binding

Supplementary\_Table\_S6

| Fold enrichment | P <sub>EA</sub> SE | P <sub>FDR</sub> | Gene Symbols             |
|-----------------|--------------------|------------------|--------------------------|
| 163,1014493     | 0,012036689        | 0,325353058      | TRIOBP, GSN              |
| 69,90062112     | 0,027863799        | 0,45788988       | LTBP4, ENG               |
| 48,93043478     | 0,039569934        | 0,544925956      | TLN1, SORBS3             |
| 44,48221344     | 0,043441029        | 0,486339425      | CECR1, CTBS              |
| 39,98095238     | 0,048225371        | 0,944658146      | ARSA, CLCN7              |
| 36,90549451     | 0,052139104        | 0,923112587      | GSN, SPTBN1              |
| 34,26938776     | 0,056036977        | 0,920547729      | TRIOBP, GSN              |
| 30,58152174     | 0,062567091        | 0,593400339      | TRIOBP, PKN1             |
| 30,58152174     | 0,062567091        | 0,593400339      | LTBP4, ENG               |
| 27,18357488     | 0,070111568        | 0,611312134      | LTBP4, ENG               |
| 24,46521739     | 0,077596214        | 0,604064797      | SPTBN1, FLNC             |
| 23,98857143     | 0,079094657        | 0,933727811      | BSG, CTBS                |
| 23,98857143     | 0,079094657        | 0,933727811      | LTBP4, ENG               |
| 22,8462585      | 0,082883261        | 0,920589785      | FOXC1, ENG               |
| 21,80779221     | 0,086656504        | 0,919068914      | C1QTNF1, IGFBP4          |
| 18,45274725     | 0,101597086        | 0,932025271      | BSG, SPTBN1              |
| 15,95557656     | 0,014763253        | 0,339215849      | PICK1, PKN1, PRKCSH      |
| 14,99285714     | 0,123557441        | 0,951289778      | TGM2, FOXC1              |
| 14,82740448     | 0,124819944        | 0,745471394      | PGC, CTSD                |
| 13,98012422     | 6,46E-05           | 0,012518759      | TLN1, ACTN4, ICAM4, LTB  |
| 13,7077551      | 0,134338376        | 0,95790116       | GSN, MFGE8               |
| 13,08467532     | 0,021481146        | 0,977954374      | BSG, FOXC1, NFIC         |
| 12,62556391     | 0,144988595        | 0,96318983       | CYB5R3, CES1             |
| 12,3018315      | 0,14850989         | 0,961559028      | FOXC1, LFNG              |
| 12,2326087      | 0,14925298         | 0,77708109       | PKN1, TGFB1I1            |
| 11,70174216     | 0,15550966         | 0,958465678      | MED16, TGFB1I1           |
| 11,70174216     | 0,15550966         | 0,958465678      | PGC, CTSD                |
| 11,42312925     | 0,158988249        | 0,952244552      | FOXC1, LFNG              |
| 10,6615873      | 0,169339507        | 0,957322355      | CYB5R3, SERPING1         |
| 10,1360161      | 0,034472993        | 0,97521605       | CNN2, ENG, ARHGDIA       |
| 9,791253644     | 0,182946098        | 0,956359876      | ANKRD33, HMG20B          |
| 9,594202899     | 0,186296346        | 0,812699725      | ACTN4, PKN1              |
| 9,469172932     | 0,039024308        | 0,950055132      | BSG, GSN, ENG            |
| 9,2671278       | 0,001975844        | 0,175382271      | TRIOBP, TLN1, ACTN4, PIK |
| 8,884656085     | 0,043790709        | 0,947648856      | SORBS3, C1QTNF1, IGFBP4  |
| 8,368106312     | 0,048761817        | 0,928246222      | TLN1, CALD1, ARHGDIA     |
| 8,155072464     | 0,215418652        | 0,849278142      | C1QTNF1, CTBS            |
| 8,131719128     | 0,012659645        | 0,965164266      | GSN, CECR1, MFGE8, IGF   |
| 8,021382751     | 0,218590373        | 0,842749991      | CTSD, CTBS               |
| 7,76673568      | 0,224895964        | 0,841169713      | STAT6, KCNN4             |
| 7,575338346     | 0,058193766        | 0,912008293      | CNN2, ENG, ARHGDIA       |
| 7,496428571     | 0,232042422        | 0,976728184      | TGFB1I1, ENG             |
| 7,496428571     | 0,232042422        | 0,976728184      | CTSD, CTBS               |
| 6,986962552     | 0,067061885        | 0,926688073      | TLN1, ACTN4, SERPING1    |
| 6,853877551     | 0,250856412        | 0,981785572      | CES1, CTBS               |
| 6,72576769      | 0,071654482        | 0,926627689      | TLN1, SORBS3, CALD1      |
| 6,672332016     | 0,072623926        | 0,601038377      | TLN1, SORBS3, SPTBN1     |
| 6,257888199     | 0,081134314        | 0,927420657      | PTP4A3, FOXC1, EPN1      |
| 5,997142857     | 0,281208633        | 0,988457495      | LTBP4, IGFBP4            |
| 5,997142857     | 0,281208633        | 0,988457495      | CNN2, ENG                |
| 5,997142857     | 0,281208633        | 0,988457495      | LAMP1, CTBS              |

# Supplementary\_Table\_S6

|             |             |             |                         |
|-------------|-------------|-------------|-------------------------|
| 5,881061873 | 0,009867133 | 0,320725042 | LAMP1, CHMP1A, GSN, PI  |
| 5,85087108  | 0,287132005 | 0,988428355 | PICK1, TAPBP            |
| 5,410955961 | 0,103746029 | 0,92747154  | LAMP1, ARSA, CTSD       |
| 5,390690209 | 0,30748745  | 0,991109801 | COL16A1, EPN1           |
| 5,330793651 | 0,037915459 | 0,966460036 | GANAB, LTBP4, PRKCSH,   |
| 5,214906832 | 0,316034852 | 0,991487265 | ZYX, ENG                |
| 5,205365402 | 0,040207848 | 0,516885289 | PLD3, SPTLC1, MED16, AF |
| 5,177823787 | 0,040741875 | 0,491311807 | KCNN4, CALD1, SPTBN1, I |
| 5,103951368 | 0,321675272 | 0,991407269 | PIP5K1C, IP6K1          |
| 5,061769115 | 0,006238826 | 0,33421867  | TLN1, BSG, CALD1, SPTBI |
| 4,860639217 | 0,123771568 | 0,761023866 | STARD10, PLTP, EPN1     |
| 4,846176046 | 0,335576548 | 0,992529068 | ZYX, COL16A1            |
| 4,750212164 | 0,341058108 | 0,992440406 | ICAM4, PIP5K1C          |
| 4,587228261 | 0,135936439 | 0,759386226 | CECR1, SOD3, LRPAP1     |
| 4,448221344 | 0,359457082 | 0,949973094 | LRPAP1, TAPBP           |
| 4,425935688 | 0,025312514 | 0,965879517 | BSG, CALD1, SPTBN1, RA  |
| 4,400218955 | 0,025760224 | 0,470665423 | ACTN4, GSN, CALD1, SPT  |
| 4,330126972 | 0,367217465 | 0,948931377 | ACTN4, PRKCSH           |
| 4,184053156 | 0,157408784 | 0,955508196 | ACTN4, ENG, SOD3        |
| 4,181014628 | 0,002727335 | 0,762898986 | SORBS3, ICAM4, MFGE8,   |
| 3,89003861  | 0,176308967 | 0,959003768 | STAT6, CNN2, ENG        |
| 3,848433919 | 0,179249315 | 0,95734404  | FOXC1, PRKCSH, EPN1     |
| 3,777727784 | 0,408389435 | 0,996466354 | CLIP3, ENG              |
| 3,671720117 | 0,192572432 | 0,960074972 | BSG, ICAM4, COL16A1     |
| 3,662377317 | 0,093089108 | 0,923822332 | GSN, C1QTNF1, CNN2, EN  |
| 3,662377317 | 0,418127673 | 0,996285621 | TGM2, IL17RD            |
| 3,580383795 | 0,425327517 | 0,996353986 | RAP1GAP, ARHGDI         |
| 3,50198123  | 0,432439549 | 0,996418664 | PARP10, ENG             |
| 3,50198123  | 0,432439549 | 0,996418664 | FOXC1, IGFBP4           |
| 3,156390977 | 0,466719027 | 0,997835819 | CHMP1A, LRPAP1          |
| 2,979946761 | 0,486298619 | 0,998105122 | SPTBN1, CNN2            |
| 2,855782313 | 0,501035825 | 0,998383909 | CES1, ARSA              |
| 2,789368771 | 0,509269184 | 0,998447833 | FOXC1, ENG              |
| 2,710573043 | 0,519372808 | 0,998561707 | C1QTNF1, TGM2           |
| 2,630668537 | 0,310150203 | 0,924657409 | RAP1GAP, RANGAP1, ARH   |
| 2,422298752 | 0,55967499  | 0,993250931 | TCIRG1, STARD10         |
| 2,406880076 | 0,348582735 | 0,991818226 | TLN1, MFGE8, ZYX        |
| 2,398857143 | 0,149796767 | 0,957889681 | CHMP1A, PGC, CTSD, DPI  |
| 2,352424749 | 0,570338568 | 0,993206237 | EML3, CLIP3             |
| 2,352424749 | 0,570338568 | 0,993206237 | ACTN4, FOXC1            |
| 2,28462585  | 0,581101348 | 0,999456413 | TCIRG1, CLCN7           |
| 2,254858746 | 0,585858551 | 0,993628595 | RRBP1, MED16            |
| 2,252448021 | 0,586309217 | 0,999448247 | ACTN4, CTSB             |
| 2,091044221 | 0,613681912 | 0,994210794 | RAP1GAP, TGM2           |
| 2,079196945 | 0,417530221 | 0,966619415 | PICK1, IGFBP4, LRPAP1   |
| 2,047298526 | 0,161979415 | 0,791187039 | NUCB1, ACTN4, GSN, LTB  |
| 2,010839786 | 0,170562644 | 0,795154656 | CHMP1A, RAP1GAP, HSPH   |
| 1,973001403 | 0,635205545 | 0,995081012 | MED16, TGFB1I1          |
| 1,91884058  | 0,64551983  | 0,995116901 | CTSD, CTSB              |
| 1,870453913 | 0,352998165 | 0,991607331 | MED16, FOXC1, TGFB1I1,  |
| 1,831188659 | 0,662871716 | 0,999870673 | SPTBN1, IL17RD          |
| 1,821916817 | 0,485271969 | 0,99827658  | CHMP1A, ACTN4, RRBP1    |
| 1,722902633 | 0,685274956 | 0,99643208  | SORBS3, FOXC1           |

# Supplementary\_Table\_S6

|             |             |             |                         |
|-------------|-------------|-------------|-------------------------|
| 1,704893198 | 0,689127764 | 0,996139263 | TRIOBP, RANGAP1         |
| 1,698305942 | 0,411296022 | 0,9962441   | RAP1GAP, SPTBN1, RANG   |
| 1,665873016 | 0,343200745 | 0,991901339 | STAT6, SORBS3, ANKRD3   |
| 1,652959272 | 0,198462946 | 0,960776322 | STAT6, RAP1GAP, PKN1, I |
| 1,631875607 | 0,544442004 | 0,998997983 | STAT6, MED16, PKN1      |
| 1,599238095 | 0,712468531 | 0,99995915  | TGM2, CLIP3             |
| 1,469382426 | 0,742701795 | 0,997879691 | LAMP1, PICK1            |
| 1,39739251  | 0,629539055 | 0,999753114 | MED16, FOXC1, TGFB111   |
| 1,37077551  | 0,76691844  | 0,999991095 | TRIOBP, CHMP1A          |
| 1,310850898 | 0,78209237  | 0,999992559 | FOXC1, IGFBP4           |
| 1,308896093 | 0,006496117 | 0,27219256  | TLN1, RAP1GAP, CALD1, I |
| 1,306553666 | 0,586229787 | 0,992675105 | STAT6, CHMP1A, PICK1, C |
| 1,083490584 | 0,675125576 | 0,996381091 | GANAB, ACTN4, RRB1, S   |
| 1,0544427   | 0,850332525 | 0,999999499 | TGM2, ARHGDI            |
| 1,052130326 | 0,850964652 | 0,999999403 | PICK1, PKN1             |
| 1,046416484 | 0,701877981 | 0,996371838 | CHMP1A, CECR1, TGFB11   |
| 0,978127275 | 0,775772021 | 0,999992188 | STAT6, FOXC1, NFIC, ENC |
| 0,920866466 | 0,886872722 | 0,999999906 | LTBP4, CECR1            |
| 0,818234695 | 0,863415548 | 0,999852682 | TGM2, PKN1, PIP5K1C, IP |
| 0,81042471  | 0,916392503 | 0,999999983 | CYB5R3, SOD3            |
| 0,763742478 | 0,905603642 | 0,999963847 | STAT6, FOXC1, NFIC      |
| 0,736222141 | 0,916186129 | 0,999999987 | STAT6, CHMP1A, ASCC2,   |
| 0,73074126  | 0,915613544 | 0,999971924 | NUCB1, STAT6, HMG20B,   |
| 0,637993921 | 0,953288547 | 1           | ASCC2, HMG20B, FOXC1,   |
| 0,5912329   | 0,97385718  | 0,999999729 | CHPF, PICK1, TGM2, LFNC |

## Supplementary\_Table\_S6

ICAM4, LTBP4, MFGE8, COL16A1

, ACTN4, PICK1, FLNC  
TNF1, IGFBP4

MFGE8, IGFBP4

Supplementary\_Table\_S6

P1A, GSN, PICK1, TGM2

4, PRKCSH, LRPAP1

1, MED16, ARSA  
1, SPTBN1, CNN2

ALD1, SPTBN1, RANGAP1, CNN2

SPTBN1, RANGAP1, CNN2  
CALD1, SPTBN1, CNN2

M4, MFGE8, TGFB111, ZYX, MFAP4, COL16A1, ENG

F1, CNN2, ENG

NGAP1, ARHGDIA

C, CTSD, DPP9, CTSB

4, GSN, LTBP4, ARSA, PRKCSH  
P1GAP, HSPB6, ACTN4, CECR1, ENG

C1, TGFB111, NFIC



Supplementary\_Table\_S6

TBN1, RANGAP1, ARHGDIA  
S3, ANKRD33, NFIC, ENG  
GAP, PKN1, RANGAP1, RASSF7, ZYX, IL17RD, IGFBP4

AP, CALD1, LTBP4, PIP5K1C, RANGAP1, STARD10, RASSF7, TAPBP, STAT6, SORBS3, GSN, C1QTNF1, TGM2, ZYX, IP6K1, CCD  
1A, PICK1, DPP9  
4, RRBP1, SPTBN1, ZYX

CR1, TGFB1I1, ZYX, SOD3  
1, NFIC, ENG

PIP5K1C, IP6K1, CLCN7

1A, ASCC2, PKN1, HMG20B, NFIC  
6, HMG20B, FOXC1, NFIC  
20B, FOXC1, ENG  
TGM2, LFNG, SOD3

## Supplementary\_Table\_S6

## Supplementary\_Table\_S6

## Supplementary\_Table\_S6

1, TGM2, ZYX, IP6K1, CCDC106, ARHGDIA, PLD3, BSG, SPTLC1, ACTN4, PICK1, PKN1, HMG20B, SERPING1, PARP10, FLNC, C

## Supplementary\_Table\_S6

## Supplementary\_Table\_S6

## Supplementary\_Table\_S6

PING1, PARP10, FLNC, COL16A1, SOD3, LRPAP1, NUCB1, KCNN4, LAMP1, CHMP1A, HSPB6, MED16, ARSA, CTSD, SPTBN1, F

## Supplementary\_Table\_S6



## Supplementary\_Table\_S6

## Supplementary\_Table\_S6

ARSA, CTSD, SPTBN1, FOXC1, CTSB, TGFB1I1, CLIP3, MFAP4, ENG, EPN1
