# Supplementary material for: The Impact of Cand1 in Prostate Cancer
Source: MDPI journal article supplement (doi:10.3390/cancers12020428), 2020-02-12
Supplement: s1 [file s1]

Supplementary\_table\_S4

| Regulation in Cand1 <sup>hi</sup> samples | Entrez Gene ID | Gene Symbol |
|-------------------------------------------|----------------|-------------|
| downregulated                             | 3783           | KCNN4       |
| downregulated                             | 8045           | RASSF7      |
| downregulated                             | 410            | ARSA        |
| downregulated                             | 3386           | ICAM4       |
| downregulated                             | 2934           | GSN         |
| downregulated                             | 1265           | CNN2        |
| downregulated                             | 1307           | COL16A1     |
| downregulated                             | 29924          | EPN1        |
| downregulated                             | 6892           | TAPBP       |
| downregulated                             | 738            | C11orf2     |
| downregulated                             | 1186           | CLCN7       |
| downregulated                             | 7052           | TGM2        |
| downregulated                             | 8425           | LTBP4       |
| downregulated                             | 23193          | GANAB       |
| downregulated                             | 11156          | PTP4A3      |
| downregulated                             | 4782           | NFIC        |
| downregulated                             | 6711           | SPTBN1      |
| downregulated                             | 6238           | RRBP1       |
| downregulated                             | 5119           | CHMP1A      |
| downregulated                             | 51816          | CECR1       |
| downregulated                             | 396            | ARHGDIA     |
| downregulated                             | 5589           | PRKCSH      |
| downregulated                             | 5909           | RAP1GAP     |
| downregulated                             | 256364         | EML3        |
| downregulated                             | 91039          | DPP9        |
| downregulated                             | 3487           | IGFBP4      |
| downregulated                             | 81             | ACTN4       |
| downregulated                             | 3955           | LFNG        |
| downregulated                             | 6649           | SOD3        |
| downregulated                             | 682            | BSG         |
| downregulated                             | 10558          | SPTLC1      |
| downregulated                             | 10174          | SORBS3      |
| downregulated                             | 5360           | PLTP        |
| downregulated                             | 10809          | STARD10     |
| downregulated                             | 9807           | IP6K1       |
| downregulated                             | 5225           | PGC         |
| downregulated                             | 84875          | PARP10      |
| downregulated                             | 1066           | CES1        |
| downregulated                             | 4240           | MFGE8       |
| downregulated                             | 5585           | PKN1        |
| downregulated                             | 79007          | DBNDD1      |
| downregulated                             | 2022           | ENG         |
| downregulated                             | 80024          | SLC24A6     |
| downregulated                             | 54756          | IL17RD      |
| downregulated                             | 10025          | MED16       |
| downregulated                             | 7094           | TLN1        |
| downregulated                             | 84164          | ASCC2       |
| downregulated                             | 10312          | TCIRG1      |
| downregulated                             | 1509           | CTSD        |
| downregulated                             | 10362          | HMG20B      |
| downregulated                             | 1727           | CYB5R3      |

# Supplementary\_table\_S4

|               |                 |
|---------------|-----------------|
| downregulated | 9289 GPR56      |
| downregulated | 6778 STAT6      |
| downregulated | 4924 NUCB1      |
| downregulated | 23646 PLD3      |
| downregulated | 11078 TRIOBP    |
| downregulated | 29903 CCDC106   |
| downregulated | 2296 FOXC1      |
| downregulated | 3916 LAMP1      |
| downregulated | 9463 PICK1      |
| downregulated | 4043 LRPAP1     |
| downregulated | 5905 RANGAP1    |
| downregulated | 23396 PIP5K1C   |
| downregulated | 375690 FAM39E   |
| downregulated | 341405 ANKRD33  |
| downregulated | 710 SERPING1    |
| downregulated | 2318 FLNC       |
| downregulated | 800 CALD1       |
| downregulated | 126393 HSPB6    |
| downregulated | 79586 CHPF      |
| downregulated | 4239 MFAP4      |
| downregulated | 25999 CLIP3     |
| downregulated | 1508 CTSB       |
| downregulated | 7791 ZYX        |
| downregulated | 114897 C1QTNF1  |
| downregulated | 7041 TGFB11     |
| upregulated   | 10797 MTHFD2    |
| upregulated   | 2961 GTF2E2     |
| upregulated   | 55832 CAND1     |
| upregulated   | 483 ATP1B3      |
| upregulated   | 3251 HPRT1      |
| upregulated   | 51053 GMNN      |
| upregulated   | 56967 C14orf132 |
| upregulated   | 7323 UBE2D3     |
| upregulated   | 10987 COPS5     |
| upregulated   | 9791 PTDSS1     |
| upregulated   | 3781 KCNN2      |
| upregulated   | 4085 MAD2L1     |
| upregulated   | 10651 MTX2      |
| upregulated   | 5889 RAD51C     |
| upregulated   | 51474 LIMA1     |
| upregulated   | 51566 ARMCX3    |
| upregulated   | 55907 CMAS      |
| upregulated   | 84661 DPY30     |
| upregulated   | 6726 SRP9       |
| upregulated   | 58515 SELK      |
| upregulated   | 10558 SPTLC1    |
| upregulated   | 4190 MDH1       |
| upregulated   | 28972 SPCS1     |
| upregulated   | 221154 EFHA1    |
| upregulated   | 515 ATP5F1      |
| upregulated   | 9117 SEC22C     |
| upregulated   | 9039 UBA3       |
| upregulated   | 11235 PDCD10    |

# Supplementary\_table\_S4

|             |        |           |
|-------------|--------|-----------|
| upregulated | 51639  | SF3B14    |
| upregulated | 2958   | GTF2A2    |
| upregulated | 51014  | TMED7     |
| upregulated | 648    | BMI1      |
| upregulated | 10247  | HRSP12    |
| upregulated | 8334   | HIST1H2AC |
| upregulated | 5706   | PSMC6     |
| upregulated | 6392   | SDHD      |
| upregulated | 7073   | TIAL1     |
| upregulated | 55958  | KLHL9     |
| upregulated | 11345  | GABARAPL2 |
| upregulated | 10447  | FAM3C     |
| upregulated | 4709   | NDUFB3    |
| upregulated | 10542  | HBXIP     |
| upregulated | 5934   | RBL2      |
| upregulated | 25874  | BRP44     |
| upregulated | 10935  | PRDX3     |
| upregulated | 58478  | ENOPH1    |
| upregulated | 1315   | COPB1     |
| upregulated | 51510  | CHMP5     |
| upregulated | 4179   | CD46      |
| upregulated | 84191  | FAM96A    |
| upregulated | 84233  | TMEM126A  |
| upregulated | 4780   | NFE2L2    |
| upregulated | 6856   | SYPL1     |
| upregulated | 50999  | TMED5     |
| upregulated | 9326   | ZNHIT3    |
| upregulated | 10959  | TMED2     |
| upregulated | 113402 | SFT2D1    |
| upregulated | 58505  | OSTC      |
| upregulated | 54880  | BCOR      |
| upregulated | 9525   | VPS4B     |
| upregulated | 6729   | SRP54     |
| upregulated | 55863  | TMEM126B  |
| upregulated | 7534   | YWHAZ     |
| upregulated | 6993   | DYNLT1    |
| upregulated | 6713   | SQLE      |
| upregulated | 10175  | CNIH      |
| upregulated | 54497  | HEATR5B   |
| upregulated | 11017  | SNRNP27   |
| upregulated | 83891  | SNX25     |
| upregulated | 388962 | BOLA3     |
| upregulated | 5217   | PFN2      |
| upregulated | 3094   | HINT1     |
| upregulated | 4259   | MGST3     |
| upregulated | 57092  | PCNP      |
| upregulated | 80349  | WDR61     |
| upregulated | 55848  | C9orf46   |
| upregulated | 6309   | SC5DL     |
| upregulated | 10049  | DNAJB6    |
| upregulated | 7319   | UBE2A     |
| upregulated | 64083  | GOLPH3    |
| upregulated | 60592  | SCOC      |

# Supplementary\_table\_S4

|             |                 |
|-------------|-----------------|
| upregulated | 6637 SNRPG      |
| upregulated | 55276 PGM2      |
| upregulated | 8895 CPNE3      |
| upregulated | 2739 GLO1       |
| upregulated | 51522 TMEM14C   |
| upregulated | 55849 ALG13     |
| upregulated | 29979 UBQLN1    |
| upregulated | 28978 TMEM14A   |
| upregulated | 26273 FBXO3     |
| upregulated | 9908 G3BP2      |
| upregulated | 7764 ZNF217     |
| upregulated | 6814 STXBP3     |
| upregulated | 54874 FNBP1L    |
| upregulated | 83787 ARMC10    |
| upregulated | 9728 SECISBP2L  |
| upregulated | 3685 ITGAV      |
| upregulated | 6845 VAMP7      |
| upregulated | 56650 CLDND1    |
| upregulated | 5716 PSMD10     |
| upregulated | 1027 CDKN1B     |
| upregulated | 25994 HIGD1A    |
| upregulated | 8813 DPM1       |
| upregulated | 1982 EIF4G2     |
| upregulated | 6902 TBCA       |
| upregulated | 79718 TBL1XR1   |
| upregulated | 33 ACADL        |
| upregulated | 51026 GOLT1B    |
| upregulated | 285636 C5orf51  |
| upregulated | 5718 PSMD12     |
| upregulated | 523 ATP6V1A     |
| upregulated | 127018 LYPLAL1  |
| upregulated | 3187 HNRNPH1    |
| upregulated | 29081 METTL5    |
| upregulated | 6611 SMS        |
| upregulated | 23204 ARL6IP1   |
| upregulated | 51635 DHRS7     |
| upregulated | 57579 FAM135A   |
| upregulated | 3320 HSP90AA1   |
| upregulated | 3336 HSPE1      |
| upregulated | 7381 UQCRB      |
| upregulated | 27258 LSM3      |
| upregulated | 64430 C14orf135 |
| upregulated | 3920 LAMP2      |
| upregulated | 1665 DHX15      |
| upregulated | 54505 DHX29     |
| upregulated | 51765 MST4      |
| upregulated | 10477 UBE2E3    |
| upregulated | 83930 STARD3NL  |
| upregulated | 55783 FTSJD1    |
| upregulated | 122809 SOCS4    |
| upregulated | 119032 C10orf32 |
| upregulated | 26175 C14orf109 |
| upregulated | 10159 ATP6AP2   |

# Supplementary\_table\_S4

|             |                 |
|-------------|-----------------|
| upregulated | 7155 TOP2B      |
| upregulated | 8939 FUBP3      |
| upregulated | 84992 PIGY      |
| upregulated | 2339 FNTA       |
| upregulated | 54918 CMTM6     |
| upregulated | 171586 ABHD3    |
| upregulated | 84693 MCEE      |
| upregulated | 56942 C16orf61  |
| upregulated | 378 ARF4        |
| upregulated | 55854 ZC3H15    |
| upregulated | 27230 SERP1     |
| upregulated | 114883 OSBPL9   |
| upregulated | 28998 MRPL13    |
| upregulated | 145815 MGC18216 |
| upregulated | 5805 PTS        |
| upregulated | 51247 PAIP2     |
| upregulated | 1655 DDX5       |
| upregulated | 11171 STRAP     |
| upregulated | 3417 IDH1       |
| upregulated | 55030 FBXO34    |
| upregulated | 56943 ENY2      |
| upregulated | 6059 ABCE1      |
| upregulated | 6596 HLTF       |
| upregulated | 152559 PAQR3    |
| upregulated | 3638 INSIG1     |
| upregulated | 6741 SSB        |
| upregulated | 6613 SUMO2      |
| upregulated | 25842 ASF1A     |
| upregulated | 6227 RPS21      |
| upregulated | 10988 METAP2    |
| upregulated | 5901 RAN        |
| upregulated | 253943 YTHDF3   |
| upregulated | 23219 FBXO28    |
| upregulated | 5911 RAP2A      |
| upregulated | 6477 SIAH1      |
| upregulated | 51003 MED31     |
| upregulated | 8545 CGGBP1     |
| upregulated | 55326 AGPAT5    |
| upregulated | 375743 PTAR1    |
| upregulated | 6164 RPL34      |
| upregulated | 1456 CSNK1G3    |
| upregulated | 26996 GPR160    |
| upregulated | 27075 TSPAN13   |
| upregulated | 51527 C14orf129 |
| upregulated | 905 CCNT2       |
| upregulated | 6428 SFRS3      |
| upregulated | 114908 TMEM123  |
| upregulated | 10923 SUB1      |
| upregulated | 1810 DR1        |
| upregulated | 892 CCNC        |
| upregulated | 27249 C2orf25   |
| upregulated | 91408 BTF3L4    |
| upregulated | 80255 SLC35F5   |

# Supplementary\_table\_S4

|             |           |              |
|-------------|-----------|--------------|
| upregulated | 25843     | MOBKL3       |
| upregulated | 100128266 | LOC100128266 |
| upregulated | 58516     | FAM60A       |

## Supplementary\_table\_S4

### Gene Name

potassium intermediate/small conductance calcium-activated channel, subfamily N, member 4  
Ras association (RalGDS/AF-6) domain family 7  
arylsulfatase A  
intercellular adhesion molecule 4 (Landsteiner-Wiener blood group)  
gelsolin (amyloidosis, Finnish type)  
calponin 2  
collagen, type XVI, alpha 1  
Homo sapiens epsin 1 (EPN1), mRNA.  
Homo sapiens TAP binding protein (tapasin) (TAPBP), transcript variant 1, mRNA.  
Homo sapiens chromosome 11 open reading frame 2 (C11orf2), mRNA.  
chloride channel 7  
transglutaminase 2 (C polypeptide, protein-glutamine-gamma-glutamyltransferase)  
latent transforming growth factor beta binding protein 4  
glucosidase, alpha; neutral AB  
protein tyrosine phosphatase type IVA, member 3  
nuclear factor I/C (CCAAT-binding transcription factor)  
spectrin, beta, non-erythrocytic 1  
ribosome binding protein 1 homolog 180kDa (dog)  
chromatin modifying protein 1A  
cat eye syndrome chromosome region, candidate 1  
Rho GDP dissociation inhibitor (GDI) alpha  
protein kinase C substrate 80K-H  
RAP1 GTPase activating protein  
Homo sapiens echinoderm microtubule associated protein like 3 (EML3), mRNA.  
Homo sapiens dipeptidyl-peptidase 9 (DPP9), mRNA.  
insulin-like growth factor binding protein 4  
Homo sapiens actinin, alpha 4 (ACTN4), mRNA.  
Homo sapiens LFNG O-fucosylpeptide 3-beta-N-acetylglucosaminyltransferase (LFNG), transcript variant 1, mRNA.  
superoxide dismutase 3, extracellular  
basigin (Ok blood group)  
serine palmitoyltransferase, long chain base subunit 1  
sorbin and SH3 domain containing 3  
phospholipid transfer protein  
Homo sapiens StAR-related lipid transfer (START) domain containing 10 (STARD10), mRNA.  
Inositol Hexakisphosphate Kinase 1  
progastricsin (pepsinogen C)  
PREDICTED: Homo sapiens poly (ADP-ribose) polymerase family, member 10 (PARP10), mRNA.  
carboxylesterase 1 (monocyte/macrophage serine esterase 1)  
milk fat globule-EGF factor 8 protein  
protein kinase N1  
Homo sapiens dysbindin (dystrobrevin binding protein 1) domain containing 1 (DBNDD1), transcript variant 1, mRNA.  
endoglin (Osler-Rendu-Weber syndrome 1)  
Homo sapiens solute carrier family 24 (sodium/potassium/calcium exchanger), member 6 (SLC24A6), mRNA.  
Homo sapiens interleukin 17 receptor D (IL17RD), mRNA.  
mediator complex subunit 16  
talin 1  
Homo sapiens activating signal cointegrator 1 complex subunit 2 (ASCC2), mRNA.  
T-cell, immune regulator 1, ATPase, H<sup>+</sup> transporting, lysosomal V0 subunit A3  
cathepsin D  
high-mobility group 20B  
cytochrome b5 reductase 3

## Supplementary\_table\_S4

G protein-coupled receptor 56  
signal transducer and activator of transcription 6, interleukin-4 induced  
nucleobindin 1  
phospholipase D family, member 3  
Homo sapiens TRIO and F-actin binding protein (TRIOBP), transcript variant 6, mRNA.  
coiled-coil domain containing 106  
forkhead box C1  
lysosomal-associated membrane protein 1  
protein interacting with PRKCA 1  
low density lipoprotein receptor-related protein associated protein 1  
Ran GTPase activating protein 1  
Homo sapiens phosphatidylinositol-4-phosphate 5-kinase, type I, gamma (PIP5K1C), mRNA.  
Homo sapiens family with sequence similarity 39, member E (FAM39E), mRNA.  
Homo sapiens ankyrin repeat domain 33 (ANKRD33), mRNA.  
serpin peptidase inhibitor, clade G (C1 inhibitor), member 1, (angioedema, hereditary)  
filamin C, gamma (actin binding protein 280)  
caldesmon 1  
Homo sapiens heat shock protein, alpha-crystallin-related, B6 (HSPB6), mRNA.  
chondroitin polymerizing factor  
microfibrillar-associated protein 4  
CAP-GLY domain containing linker protein 3  
Homo sapiens cathepsin B (CTSB), transcript variant 2, mRNA.  
zyxin  
Homo sapiens C1q and tumor necrosis factor related protein 1 (C1QTNF1), transcript variant 2, mRNA.  
transforming growth factor beta 1 induced transcript 1  
methylenetetrahydrofolate dehydrogenase (NADP+ dependent) 2, methenyltetrahydrofolate cyclohydrolase  
general transcription factor IIE, polypeptide 2, beta 34kDa  
cullin-associated and neddylation-dissociated 1  
ATPase, Na<sup>+</sup>/K<sup>+</sup> transporting, beta 3 polypeptide  
hypoxanthine phosphoribosyltransferase 1 (Lesch-Nyhan syndrome)  
geminin, DNA replication inhibitor  
chromosome 14 open reading frame 132  
ubiquitin-conjugating enzyme E2D 3 (UBC4/5 homolog, yeast)  
COP9 constitutive photomorphogenic homolog subunit 5 (Arabidopsis)  
phosphatidylserine synthase 1  
potassium intermediate/small conductance calcium-activated channel, subfamily N, member 2  
MAD2 mitotic arrest deficient-like 1 (yeast)  
metaxin 2  
Homo sapiens RAD51 homolog C (S. cerevisiae) (RAD51C), transcript variant 2, mRNA.  
Homo sapiens LIM domain and actin binding 1 (LIMA1), mRNA.  
Homo sapiens armadillo repeat containing, X-linked 3 (ARMCX3), transcript variant 3, mRNA.  
Homo sapiens cytidine monophosphate N-acetylneuraminic acid synthetase (CMAS), mRNA.  
Homo sapiens dpy-30 homolog (C. elegans) (DPY30), mRNA.  
signal recognition particle 9kDa  
Homo sapiens selenoprotein K (SELK), mRNA.  
serine palmitoyltransferase, long chain base subunit 1  
malate dehydrogenase 1, NAD (soluble)  
Homo sapiens signal peptidase complex subunit 1 homolog (S. cerevisiae) (SPCS1), mRNA.  
Homo sapiens EF-hand domain family, member A1 (EFHA1), mRNA.  
Homo sapiens ATP synthase, H<sup>+</sup> transporting, mitochondrial F0 complex, subunit B1 (ATP5F1), nuclear gene encoding  
Homo sapiens SEC22 vesicle trafficking protein homolog C (S. cerevisiae) (SEC22C), transcript variant 1, mRNA.  
ubiquitin like modifier activating enzyme 3  
Homo sapiens programmed cell death 10 (PDCD10), transcript variant 2, mRNA.



#### Supplementary\_table\_S4

Homo sapiens splicing factor 3B, 14 kDa subunit (SF3B14), mRNA.  
general transcription factor IIA, 2, 12kDa  
Homo sapiens transmembrane emp24 protein transport domain containing 7 (TMED7), mRNA.  
BMI1 polycomb ring finger oncogene  
heat-responsive protein 12  
histone cluster 1, H2ac  
proteasome (prosome, macropain) 26S subunit, ATPase, 6  
succinate dehydrogenase complex, subunit D, integral membrane protein  
TIA1 cytotoxic granule-associated RNA binding protein-like 1  
Homo sapiens kelch-like 9 (Drosophila) (KLHL9), mRNA.  
Homo sapiens GABA(A) receptor-associated protein-like 2 (GABARAPL2), mRNA.  
family with sequence similarity 3, member C  
NADH dehydrogenase (ubiquinone) 1 beta subcomplex, 3, 12kDa  
hepatitis B virus x interacting protein  
retinoblastoma-like 2 (p130)  
brain protein 44  
peroxiredoxin 3  
Homo sapiens enolase-phosphatase 1 (ENOPH1), mRNA.  
coatomer protein complex, subunit beta 1  
Homo sapiens chromatin modifying protein 5 (CHMP5), mRNA.  
CD46 molecule, complement regulatory protein  
Homo sapiens family with sequence similarity 96, member A (FAM96A), transcript variant 1, mRNA.  
Homo sapiens transmembrane protein 126A (TMEM126A), mRNA.  
nuclear factor (erythroid-derived 2)-like 2  
synaptophysin-like 1  
transmembrane emp24 protein transport domain containing 5  
Homo sapiens zinc finger, HIT type 3 (ZNHIT3), transcript variant 1, mRNA.  
transmembrane emp24 domain trafficking protein 2  
Homo sapiens SFT2 domain containing 1 (SFT2D1), mRNA.  
Homo sapiens oligosaccharyltransferase complex subunit (OSTC), mRNA.  
Homo sapiens BCL6 co-repressor (BCOR), transcript variant 2, mRNA.  
Homo sapiens vacuolar protein sorting 4 homolog B (*S. cerevisiae*) (VPS4B), mRNA.  
signal recognition particle 54kDa  
Homo sapiens transmembrane protein 126B (TMEM126B), mRNA.  
tyrosine 3-monooxygenase/tryptophan 5-monooxygenase activation protein, zeta polypeptide  
dynein, light chain, Tctex-type 1  
squalene epoxidase  
cornichon homolog (Drosophila)  
Homo sapiens HEAT repeat containing 5B (HEATR5B), mRNA.  
Homo sapiens small nuclear ribonucleoprotein 27kDa (U4/U6.U5) (SNRNP27), mRNA.  
Homo sapiens sorting nexin 25 (SNX25), mRNA.  
Homo sapiens bolA homolog 3 (*E. coli*) (BOLA3), transcript variant 2, mRNA.  
profilin 2  
histidine triad nucleotide binding protein 1  
microsomal glutathione S-transferase 3  
Homo sapiens PEST proteolytic signal containing nuclear protein (PCNP), mRNA.  
Homo sapiens WD repeat domain 61 (WDR61), mRNA.  
Homo sapiens chromosome 9 open reading frame 46 (C9orf46), mRNA.  
sterol-C5-desaturase (ERG3 delta-5-desaturase homolog, *S. cerevisiae*)-like  
Homo sapiens DnaJ (Hsp40) homolog, subfamily B, member 6 (DNAJB6), transcript variant 1, mRNA.  
ubiquitin-conjugating enzyme E2A (RAD6 homolog)  
Homo sapiens golgi phosphoprotein 3 (coat-protein) (GOLPH3), mRNA.  
Homo sapiens short coiled-coil protein (SCOC), mRNA.

## Supplementary\_table\_S4

small nuclear ribonucleoprotein polypeptide G  
 Homo sapiens phosphoglucomutase 2 (PGM2), mRNA.  
 Homo sapiens copine III (CPNE3), mRNA.  
 glyoxalase I  
 Homo sapiens transmembrane protein 14C (TMEM14C), mRNA.  
 Homo sapiens asparagine-linked glycosylation 13 homolog (*S. cerevisiae*) (ALG13), mRNA.  
 Homo sapiens ubiquilin 1 (UBQLN1), transcript variant 1, mRNA.  
 Homo sapiens transmembrane protein 14A (TMEM14A), mRNA.  
 Homo sapiens F-box protein 3 (FBXO3), transcript variant 2, mRNA.  
 GTPase activating protein (SH3 domain) binding protein 2  
 zinc finger protein 217  
 syntaxin binding protein 3  
 Homo sapiens formin binding protein 1-like (FNBP1L), transcript variant 1, mRNA.  
 Homo sapiens armadillo repeat containing 10 (ARMC10), mRNA.  
 SECIS binding protein 2 like  
 integrin, alpha V (vitronectin receptor, alpha polypeptide, antigen CD51)  
 vesicle associated membrane protein 7  
 Homo sapiens claudin domain containing 1 (CLDND1), transcript variant 1, mRNA.  
 proteasome (prosome, macropain) 26S subunit, non-ATPase, 10  
 cyclin-dependent kinase inhibitor 1B (p27, Kip1)  
 Homo sapiens HIG1 hypoxia inducible domain family, member 1A (HIGD1A), transcript variant 1, mRNA.  
 dolichyl-phosphate mannosyltransferase polypeptide 1, catalytic subunit  
 eukaryotic translation initiation factor 4 gamma, 2  
 tubulin folding cofactor A  
 Homo sapiens transducin (beta)-like 1X-linked receptor 1 (TBL1XR1), mRNA.  
 acyl-Coenzyme A dehydrogenase, long chain  
 Homo sapiens golgi transport 1 homolog B (*S. cerevisiae*) (GOLT1B), mRNA.  
 Homo sapiens chromosome 5 open reading frame 51 (C5orf51), mRNA.  
 proteasome (prosome, macropain) 26S subunit, non-ATPase, 12  
 ATPase, H<sup>+</sup> transporting, lysosomal 70kDa, V1 subunit A  
 Homo sapiens lysophospholipase-like 1 (LYPLAL1), mRNA.  
 heterogeneous nuclear ribonucleoprotein H1  
 Homo sapiens methyltransferase like 5 (METTL5), mRNA.  
 spermine synthase  
 Homo sapiens ADP-ribosylation factor-like 6 interacting protein 1 (ARL6IP1), mRNA.  
 Homo sapiens dehydrogenase/reductase (SDR family) member 7 (DHRS7), mRNA.  
 Homo sapiens family with sequence similarity 135, member A (FAM135A), mRNA.  
 Homo sapiens heat shock protein 90kDa alpha (cytosolic), class A member 1 (HSP90AA1), transcript variant 1, mRNA.  
 heat shock 10kDa protein 1 (chaperonin 10)  
 ubiquinol-cytochrome c reductase binding protein  
 LSM3 homolog, U6 small nuclear RNA associated (*S. cerevisiae*)  
 Homo sapiens chromosome 14 open reading frame 135 (C14orf135), mRNA.  
 lysosomal-associated membrane protein 2  
 DEAH (Asp-Glu-Ala-His) box polypeptide 15  
 Homo sapiens DEAH (Asp-Glu-Ala-His) box polypeptide 29 (DHX29), mRNA.  
 Homo sapiens serine/threonine protein kinase MST4 (MST4), transcript variant 1, mRNA.  
 PREDICTED: Homo sapiens ubiquitin-conjugating enzyme E2E 3 (UBC4/5 homolog, yeast), transcript variant 2 (UBE2E)  
 Homo sapiens STARD3 N-terminal like (STARD3NL), mRNA.  
 Homo sapiens FtsJ methyltransferase domain containing 1 (FTSJD1), transcript variant 1, mRNA.  
 Homo sapiens suppressor of cytokine signaling 4 (SOCS4), transcript variant 1, mRNA.  
 Homo sapiens chromosome 10 open reading frame 32 (C10orf32), mRNA.  
 Homo sapiens chromosome 14 open reading frame 109 (C14orf109), transcript variant 2, mRNA.  
 ATPase, H<sup>+</sup> transporting, lysosomal accessory protein 2

## Supplementary\_table\_S4

topoisomerase (DNA) II beta 180kDa  
PREDICTED: Homo sapiens far upstream element (FUSE) binding protein 3 (FUBP3), mRNA.  
Homo sapiens phosphatidylinositol glycan anchor biosynthesis, class Y (PIGY), transcript variant 2, mRNA.  
farnesyltransferase, CAAX box, alpha  
Homo sapiens CKLF-like MARVEL transmembrane domain containing 6 (CMTM6), mRNA.  
Homo sapiens abhydrolase domain containing 3 (ABHD3), mRNA.  
Homo sapiens methylmalonyl CoA epimerase (MCEE), mRNA.  
Homo sapiens chromosome 16 open reading frame 61 (C16orf61), mRNA.  
ADP-ribosylation factor 4  
zinc finger CCCH-type containing 15  
stress associated endoplasmic reticulum protein 1  
Homo sapiens oxysterol binding protein-like 9 (OSBPL9), transcript variant 7, mRNA.  
Homo sapiens mitochondrial ribosomal protein L13 (MRPL13), nuclear gene encoding mitochondrial protein, mRNA.  
PREDICTED: Homo sapiens hypothetical protein MGC18216 (MGC18216), mRNA.  
6-pyruvoyltetrahydropterin synthase  
Homo sapiens poly(A) binding protein interacting protein 2 (PAIP2), transcript variant 2, mRNA.  
DEAD (Asp-Glu-Ala-Asp) box polypeptide 5  
serine/threonine kinase receptor associated protein  
isocitrate dehydrogenase 1 (NADP+), soluble  
Homo sapiens F-box protein 34 (FBXO34), mRNA.  
Homo sapiens enhancer of yellow 2 homolog (Drosophila) (ENY2), mRNA.  
ATP-binding cassette, sub-family E (OABP), member 1  
helicase-like transcription factor  
Homo sapiens progesterone and adipoQ receptor family member III (PAQR3), mRNA.  
insulin induced gene 1  
Sjogren syndrome antigen B (autoantigen La)  
Homo sapiens SMT3 suppressor of mif two 3 homolog 2 (S. cerevisiae) (SUMO2), transcript variant 2, mRNA.  
ASF1 anti-silencing function 1 homolog A (S. cerevisiae)  
ribosomal protein S21  
Homo sapiens methionyl aminopeptidase 2 (METAP2), mRNA.  
RAN, member RAS oncogene family  
Homo sapiens YTH domain family, member 3 (YTHDF3), mRNA.  
Homo sapiens F-box protein 28 (FBXO28), mRNA.  
Homo sapiens RAP2A, member of RAS oncogene family (RAP2A), mRNA.  
seven in absentia homolog 1 (Drosophila)  
Homo sapiens mediator complex subunit 31 (MED31), mRNA.  
Homo sapiens CGG triplet repeat binding protein 1 (CGGBP1), transcript variant 1, mRNA.  
Homo sapiens 1-acylglycerol-3-phosphate O-acyltransferase 5 (lysophosphatidic acid acyltransferase, epsilon) (AGP)  
Homo sapiens protein prenyltransferase alpha subunit repeat containing 1 (PTAR1), mRNA.  
ribosomal protein L34  
Homo sapiens casein kinase 1, gamma 3 (CSNK1G3), transcript variant 2, mRNA.  
Homo sapiens G protein-coupled receptor 160 (GPR160), mRNA.  
tetraspanin 13  
Homo sapiens chromosome 14 open reading frame 129 (C14orf129), mRNA.  
Homo sapiens cyclin T2 (CCNT2), transcript variant b, mRNA.  
splicing factor, arginine/serine-rich 3  
Homo sapiens transmembrane protein 123 (TMEM123), mRNA.  
SUB1 homolog (S. cerevisiae)  
down-regulator of transcription 1, TBP-binding (negative cofactor 2)  
Homo sapiens cyclin C (CCNC), transcript variant 1, mRNA.  
Homo sapiens chromosome 2 open reading frame 25 (C2orf25), mRNA.  
Homo sapiens basic transcription factor 3-like 4 (BTF3L4), mRNA.  
Homo sapiens solute carrier family 35, member F5 (SLC35F5), mRNA.

#### Supplementary\_table\_S4

MOB family member 4, phocein

PREDICTED: Homo sapiens misc\_RNA (LOC100128266), miscRNA.

Homo sapiens family with sequence similarity 60, member A (FAM60A), transcript variant 2, mRNA.
